# Supplementary material for: Gold(i)-catalyzed tandem cyclization of cyclopropylidene-tethered propargylic alcohols: an approach to functionalized naphtho[2,3-c]pyrans
Source: Royal Society of Chemistry journal article supplement (doi:10.1039/d0cc03285a), 2020-01-01

## Electronic Supplementary Information

---

### Electronic Supplementary Information

# Gold(I)-Catalyzed Tandem Cyclization of Cyclopropylidene-tethered Propargylic Alcohols: An Approach to Functionalized Naphtho[2,3-c]pyrans

Jian Li<sup>a,b</sup>, Fang Yang<sup>a</sup>, Weiwei Hu<sup>a</sup>, Bo Ren<sup>a</sup>, Zi-Sheng Chen,<sup>a,\*</sup> and Kegong Ji<sup>a,\*</sup>

<sup>a</sup> Shaanxi Key Laboratory of Natural Products & Chemical Biology, College of Chemistry and Pharmacy, Northwest A&F University, Yangling 712100, Shaanxi, P. R. China.

<sup>b</sup> College of Plant Protection, Northwest A&F University, Yangling, Shaanxi 712100, China.

E-mail: [chenzsh@nwsuaf.edu.cn](mailto:chenzsh@nwsuaf.edu.cn); [jikegong@nwsuaf.edu.cn](mailto:jikegong@nwsuaf.edu.cn)

### Contents

|   |                                                                               |        |
|---|-------------------------------------------------------------------------------|--------|
| 1 | General                                                                       | S3     |
| 2 | Table S1 Screening conditions                                                 | S4     |
| 3 | Experimental procedures                                                       | S5-16  |
| 4 | General procedure of the gold catalysis                                       | S16-24 |
| 5 | Preparation of compound <b>3</b>                                              | S25    |
| 6 | Mechanistic studies                                                           | S25-26 |
| 7 | X-ray structure of <b>2v</b>                                                  | S27-32 |
| 8 | References                                                                    | S32    |
| 9 | Copies of <sup>1</sup> H NMR and <sup>13</sup> C NMR Spectra of all compounds | S33    |

### 1. General:

Dry tetrahydrofuran (THF) and toluene were distilled over sodium under N<sub>2</sub> prior to use. Anhydrous 1,2-dichloroethane, PhCl and PhF were bought from Energy Chemical. Dry DCM was distilled over calcium hydride at least for 1 h prior to use. All reactions sensitive to air or moisture were conducted under nitrogen atmosphere in dry solvents. All glassware and stir bars were washed with aquaregia prior to use.

<sup>1</sup>H NMR and <sup>13</sup>C NMR spectra were recorded on a Bruker Advance spectrometer at 500 MHz and 125 MHz in CDCl<sub>3</sub>, *d*-Acetone or *d*-DMSO with reference to residual solvents signals [<sup>1</sup>H NMR CDCl<sub>3</sub> (7.26); <sup>13</sup>C NMR CDCl<sub>3</sub> (77.16)]. Chemical shift values were given in δ (ppm) and coupling constants were mentioned in Hz. Proton multiplicity is reported as a singlet (s), a broad singlet (br), a doublet (d), a triplet (t), a triplet double (td) or a multiplet (m). High resolution mass spectrometry (HRMS) was performed with a Thermo Scientific LTQ Orbitrap XL unless otherwise noted.

2. Table S1 Screening conditions.

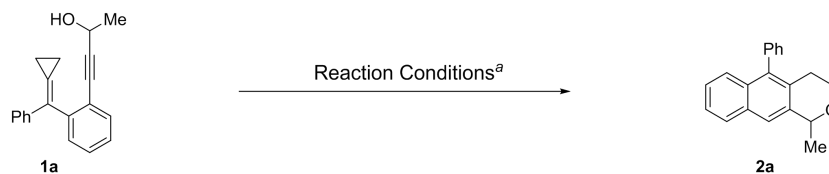

| Entry | Catalyst<br>(5 mol %)                                      | Solvents          | T<br>(°C) | Additive<br>(5 mol %) | Time<br>(h) | Yield(%)<br><b>2a</b> |
|-------|------------------------------------------------------------|-------------------|-----------|-----------------------|-------------|-----------------------|
| 1     | IPrAuCl                                                    | DCE               | 75        | AgNTf <sub>2</sub>    | 36          | messy                 |
| 2     | BrettPhosAuCl                                              | DCE               | 75        | AgNTf <sub>2</sub>    | 36          | messy                 |
| 3     | (2,4- <sup>t</sup> Bu <sub>2</sub> PhO) <sub>3</sub> PAuCl | DCE               | 75        | AgNTf <sub>2</sub>    | 36          | messy                 |
| 4     | Ph <sub>3</sub> PAuCl                                      | DCE               | 75        | AgNTf <sub>2</sub>    | 36          | No reaction           |
| 5     | Me <sub>4</sub> <sup>t</sup> BuXPhosAuCl                   | DCE               | 75        | AgNTf <sub>2</sub>    | 36          | 44                    |
| 6     | XPhosAuCl                                                  | DCE               | 75        | AgNTf <sub>2</sub>    | 36          | messy                 |
| 7     | PicAuCl <sub>2</sub>                                       | DCE               | 75        | -                     | 36          | messy                 |
| 8     | Me <sub>4</sub> <sup>t</sup> BuXPhosAuNTf <sub>2</sub>     | toluene           | 75        | -                     | 36          | 60                    |
| 9     | Me <sub>4</sub> <sup>t</sup> BuXPhosAuNTf <sub>2</sub>     | PhCF <sub>3</sub> | 75        | -                     | 36          | 55                    |
| 10    | Me <sub>4</sub> <sup>t</sup> BuXPhosAuNTf <sub>2</sub>     | PhCl              | 75        | -                     | 36          | 77                    |
| 11    | Me <sub>4</sub> <sup>t</sup> BuXPhosAuNTf <sub>2</sub>     | PhF               | 75        | -                     | 36          | 81                    |
| 12    | Me <sub>4</sub> <sup>t</sup> BuXPhosAuNTf <sub>2</sub>     | PhF               | 85        | -                     | 24          | 83                    |
| 13    | Me <sub>4</sub> <sup>t</sup> BuXPhosAuCl                   | PhF               | 85        | NaBARF                | 24          | messy                 |
| 14    | Me <sub>4</sub> <sup>t</sup> BuXPhosAuCl                   | PhF               | 85        | AgOTs                 | 24          | No reaction           |
| 15    | Me <sub>4</sub> <sup>t</sup> BuXPhosAuCl                   | PhF               | 85        | AgOTf                 | 24          | 24                    |
| 16    | Me <sub>4</sub> <sup>t</sup> BuXPhosAuCl                   | PhF               | 85        | AgSbF <sub>6</sub>    | 24          | messy                 |

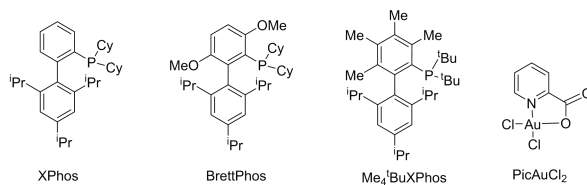

<sup>a</sup> Reaction conditions: All reactions were run in vials in the presence of **1a** (0.2 mmol); [**1a**] = 0.05 M.

## 3. Experimental procedures:

## Procedure 1.

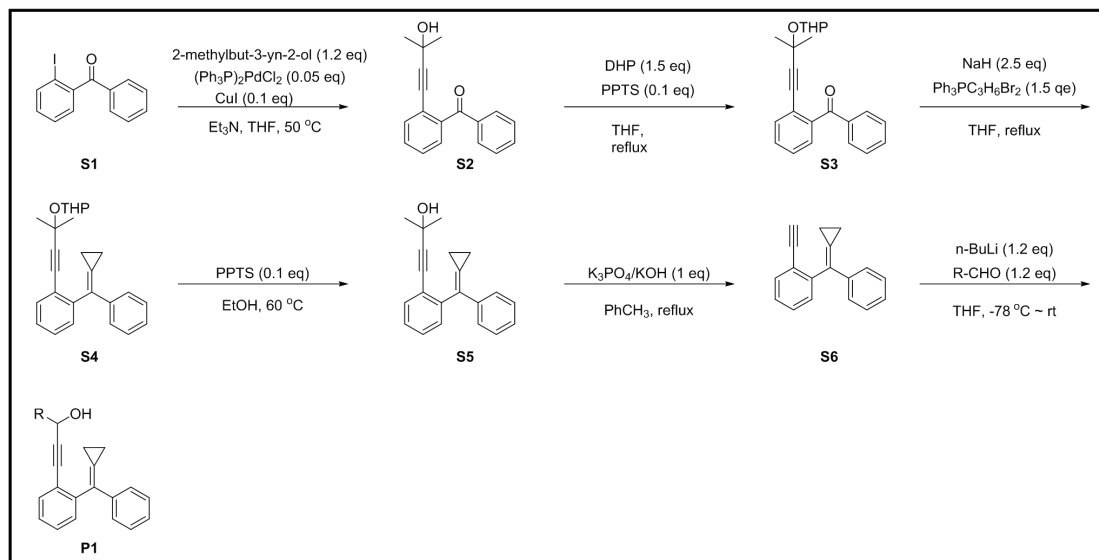

Figure S1. Procedure 1

**S1**<sup>1</sup> (6.16 g, 20 mmol, 1 eq) was dissolved in 40 mL dry THF and 20 mL  $\text{Et}_3\text{N}$  and the resulting mixture was degassed and flushed with  $\text{N}_2$  for three times at room temperature.  $(\text{PPh}_3)_2\text{PdCl}_2$  (5 mol %) and CuI (10 mol %) was added to the above mixture successively, and the resulting mixture was degassed and flushed with  $\text{N}_2$  for three times at room temperature, and then 2-methylbut-3-yn-2-ol (2.0 g, 24 mmol, 1.2 eq) was added to the above mixture dropwise at room temperature. The reaction mixture was heated at 50 °C for 12 h, upon completion, the mixture was quenched with saturated  $\text{NH}_4\text{Cl}$  solution, extracted with EtOAc, washed with brine, dried over  $\text{Na}_2\text{SO}_4$ , filtered, and concentrated to get the crude product which was purified by chromatography to get the desired compound **S2** (4.84 g, 18.3 mmol, 92%).

To a solution of **S2** (3.96 g, 15 mmol, 1 eq) in 40 mL dry DCM was added PPTS (378 mg, 0.1 eq) at 0 °C, and then DHP (1.89g, 22.5 mmol, 1.2 eq) was added to the above mixture dropwise. After addition, the reaction mixture was stirred at room temperature for 5 h. Upon completion, the mixture was quenched with saturated  $\text{NaHCO}_3$  solution, extracted with DCM, washed with brine, dried over  $\text{Na}_2\text{SO}_4$ , filtered, and concentrated to get the crude product which was purified by

chromatography to get the desired compound **S3** (4.7 g, 13.5 mmol, 90 %).

$\text{Ph}_3\text{PC}_3\text{H}_6\text{Br}_2$  (6.96 g, 15 mmol, 1.5 eq) was suspended in 80 mL dry THF and NaH (1 g, 25 mmol, 2.5 eq) was added to the above reaction mixture in one portion at room temperature. The resulting mixture was heated at 70 °C for 18 h under a nitrogen atmosphere, then **S3** (3.48 g, 10 mmol, 1.0 eq) dissolved in 10 mL dry THF was added to the above mixture dropwise within 5 min. The mixture was heated at 70 °C for another 4 h. Upon completion, the reaction was quenched with saturated  $\text{NH}_4\text{Cl}$  solution, extracted with EtOAc, washed with brine, dried over  $\text{Na}_2\text{SO}_4$ , filtered, and concentrated to get the crude product which was purified by chromatography to get the desired compound **S4** (3.18 g, 85 %).

To a solution of **S4** (1 eq) in EtOH was added PPTS (0.1 eq) at room temperature, the resulting mixture was heated at 60 °C for 8 hours. Upon completion, the reaction was quenched with saturated  $\text{NaHCO}_3$  solution, and evaporated nearly to dry, diluted with water, extracted with EtOAc, washed with brine, dried over  $\text{Na}_2\text{SO}_4$ , filtered, and concentrated to get the crude product which was purified by chromatography to get the desired compound **S5** (96 %).

To a solution of **S6** (1 eq) in dry toluene was added KOH (1 eq) and  $\text{K}_3\text{PO}_4$  (1 eq), and then the resulting mixture was heated at 120 °C for 2 h. Upon completion, the reaction mixture was filtered through a celite plug and concentrated to get the crude product which was purified by chromatography to get the desired compound **S6** (91 %).<sup>2</sup>

To a solution of **S6** (1.0 eq) in THF at -78 °C was added n-BuLi (1.2 eq) dropwise under a nitrogen atmosphere. After stirring at -78 °C for 1 h, the substituted aldehydes (1.2 eq), dissolved in 5 mL THF, were added to the above mixture dropwise. After addition, the mixture was allowed to warm up to rt and stirred for another 1 h. Upon completion, the mixture was quenched with saturated  $\text{NH}_4\text{Cl}$  solution, extracted with EtOAc, washed with brine, dried over  $\text{Na}_2\text{SO}_4$ , filtered, and concentrated to get the crude product which was purified by chromatography to get the desired compound **P1**.

## Procedure 2.

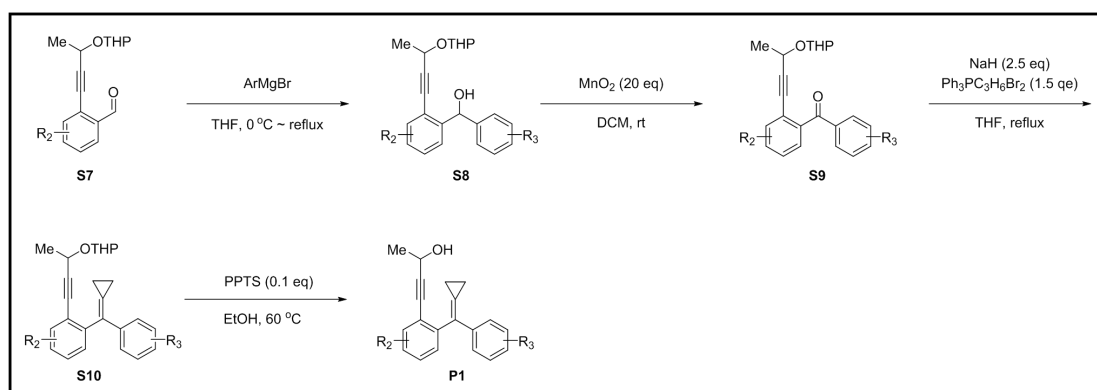

Figure S2. Procedure 2

To a solution of **S7** (10 mmol, 1 eq) in 30 mL dry THF was added  $\text{ArMgBr}$  (12 mmol, 1.2 eq) dropwise under a nitrogen atmosphere at  $0^\circ\text{C}$ . After addition the resulting mixture was stirred at  $75^\circ\text{C}$  for two hours. Upon completion, the mixture was quenched with saturated  $\text{NH}_4\text{Cl}$  solution, extracted with EtOAc, washed with brine, dried over  $\text{Na}_2\text{SO}_4$ , filtered, and concentrated to get the crude product which was purified by chromatography to get the desired compound **S8**.

To a solution of **S8** (1.0 eq) in dry  $\text{CH}_2\text{Cl}_2$  was added  $\text{MnO}_2$  (20 eq) in one portion at rt and then the mixture was stirred at rt for 5 h. Upon completion, the mixture was filtered through a celite plug, concentrated to give the crude product and the residue was purified by chromatography to get the desired substrate **S9**.

$\text{Ph}_3\text{PC}_3\text{H}_6\text{Br}_2$  (1.5 eq) was suspended in dry THF and  $\text{NaH}$  (2.5 eq) was added to the above reaction mixture in one portion at room temperature. The resulting mixture was heated at  $70^\circ\text{C}$  for 18 h under a nitrogen atmosphere, then **S9** (1.0 eq) dissolved in 10 mL dry THF was added to the above mixture dropwise within 5 min. The mixture was heated at  $70^\circ\text{C}$  for another 7 h. Upon completion, the reaction was quenched with saturated  $\text{NH}_4\text{Cl}$  solution, extracted with EtOAc, washed with brine, dried over  $\text{Na}_2\text{SO}_4$ , filtered, and concentrated to get the crude product which was purified by chromatography to get the desired compound **S10**.

To a solution of **S10** (1 eq) in EtOH was added PPTS (0.1 eq) at room temperature, the resulting mixture was heated at  $60^\circ\text{C}$  for 8 hours. Upon completion, the reaction was quenched with saturated  $\text{NaHCO}_3$  solution, and evaporated nearly to

dry, diluted with water, extracted with EtOAc, washed with brine, dried over Na<sub>2</sub>SO<sub>4</sub>, filtered, and concentrated to get the crude product which was purified by chromatography to get the desired compound **P1**.

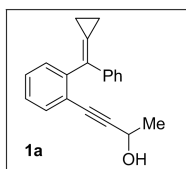

**4-(2-(cyclopropylidene(phenyl)methyl)phenyl)but-3-yn-2-ol, 1a**, overall yield 56%, light yellow oil; <sup>1</sup>H NMR (500 MHz, CDCl<sub>3</sub>): δ = 7.47 - 7.43 (m, 3H), 7.37 - 7.36 (m, 2H), 7.34 - 7.22 (m, 4H), 4.37 (q, *J* = 6.5 Hz, 1H), 1.61 - 1.57 (m, 2H), 1.28 - 1.25 (m, 3H), 1.19 (d, *J* = 7.0 Hz, 3H); <sup>13</sup>C NMR (125 MHz, CDCl<sub>3</sub>): δ = 144.0, 141.0, 132.5, 130.4, 129.4, 128.5, 128.2, 127.3, 127.1, 126.7, 126.4, 122.3, 95.1, 83.9, 58.7, 24.0, 5.3, 2.4; HRMS (ESI) *m/z* calcd for C<sub>20</sub>H<sub>19</sub>O<sup>+</sup> (M+H)<sup>+</sup> 275.1430, found 275.1435.

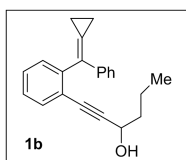

**1-(2-(cyclopropylidene(phenyl)methyl)phenyl)hex-1-yn-3-ol, 1b**, overall yield 51%, light yellow oil; <sup>1</sup>H NMR (500 MHz, CDCl<sub>3</sub>): δ = 7.50 - 7.45 (m, 3H), 7.37 - 7.28 (m, 5H), 7.26 - 7.23 (m, 1H), 4.25 (t, *J* = 6.5 Hz, 1H), 1.62 - 1.59 (m, 2H), 1.52 - 1.35 (m, 3H), 1.30 - 1.24 (m, 4H), 0.86 (t, *J* = 7.0 Hz, 3H); <sup>13</sup>C NMR (125 MHz, CDCl<sub>3</sub>): δ = 144.0, 140.8, 132.5, 130.4, 129.4, 128.4, 128.2, 127.1, 127.0, 126.7, 126.1, 122.5, 94.2, 84.6, 62.6, 39.7, 18.3, 13.8, 5.3, 2.2; HRMS (ESI) *m/z* calcd for C<sub>22</sub>H<sub>23</sub>O<sup>+</sup> (M+H)<sup>+</sup> 303.1743, found 303.1745.

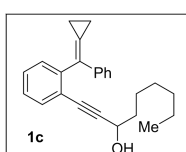

**1-(2-(cyclopropylidene(phenyl)methyl)phenyl)non-1-yn-3-ol, 1c**, overall yield 55%, light yellow oil; <sup>1</sup>H NMR (500 MHz, CDCl<sub>3</sub>): δ = 7.47 - 7.43 (m, 3H), 7.36 - 7.35 (m, 2H), 7.33 - 7.27 (m, 3H), 7.24 - 7.21 (m, 1H), 4.22 (t, *J* = 6.5 Hz, 1H), 1.60 - 1.57 (m, 2H), 1.49 - 1.37 (m, 2H), 1.29 - 1.21 (m, 11H), 0.88 (t, *J* = 7.0 Hz, 3H); <sup>13</sup>C NMR (125 MHz, CDCl<sub>3</sub>): δ = 144.0, 140.8, 132.5, 130.4, 129.4, 128.4, 128.2, 127.2, 127.1, 126.7, 126.2, 122.5, 94.2, 84.7, 62.9, 37.6, 31.8, 29.1, 25.1, 22.7, 14.2, 5.4, 2.3; HRMS (ESI) *m/z* calcd for C<sub>25</sub>H<sub>29</sub>O<sup>+</sup> (M+H)<sup>+</sup> 345.2213, found 345.2216.

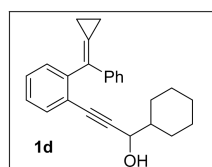

**1-cyclohexyl-3-(2-(cyclopropylidene(phenyl)methyl)phenyl)prop-2-yn-1-ol, 1d**, overall yield 49%, light yellow oil; <sup>1</sup>H NMR (500



**MHz, CDCl<sub>3</sub>**):  $\delta$  = 7.48 (d,  $J$  = 7.5 Hz, 1H), 7.43 (d,  $J$  = 7.5 Hz, 2H), 7.37 - 7.27 (m, 5H), 7.22 (t,  $J$  = 7.0 Hz, 1H), 4.03 (t,  $J$  = 5.5 Hz, 1H), 1.67 - 1.56 (m, 7H), 1.35 - 1.27 (m, 1H), 1.22 (t,  $J$  = 8.0 Hz, 2H), 1.17 - 1.09 (m, 3H), 1.05 - 0.97 (m, 1H), 0.91 - 0.79 (m, 2H); **<sup>13</sup>C NMR (125 MHz, CDCl<sub>3</sub>)**:  $\delta$  = 144.0, 140.6, 132.5, 130.3, 129.3, 128.4, 128.2, 127.0, 126.7, 125.9, 122.6, 93.0, 85.4, 67.6, 44.1, 28.5, 27.9, 26.4, 26.0, 26.0, 5.5, 2.1; **HRMS (ESI)**  $m/z$  calcd for C<sub>25</sub>H<sub>27</sub>O<sup>+</sup> (M+H)<sup>+</sup> 343.2056, found 343.2059.

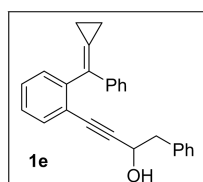

**4-(2-(cyclopropylidene(phenyl)methyl)phenyl)-1-phenylbut-3-yn-2-ol, 1e**, overall yield 46%, light yellow oil; **<sup>1</sup>H NMR (500 MHz, CDCl<sub>3</sub>)**:  $\delta$  = 7.46 (d,  $J$  = 8.0 Hz, 1H), 7.42 (d,  $J$  = 7.5 Hz, 2H), 7.39 (d,  $J$  = 4.0 Hz, 2H), 7.35 - 7.29 (m, 3H), 7.27 - 7.22 (m, 4H), 7.17 - 7.15 (m, 2H), 4.46 - 4.44 (m, 1H), 2.75 (d,  $J$  = 6.5 Hz, 2H), 1.59 - 1.56 (m, 2H), 1.35 (br, 1H), 1.28 - 1.25 (m, 2H); **<sup>13</sup>C NMR (125 MHz, CDCl<sub>3</sub>)**:  $\delta$  = 144.0, 141.0, 136.7, 132.6, 130.4, 129.9, 129.3, 128.5, 128.3, 128.2, 127.3, 127.1, 126.8, 126.7, 126.4, 122.3, 93.4, 85.6, 63.5, 43.8, 5.2, 2.4; **HRMS (ESI)**  $m/z$  calcd for C<sub>26</sub>H<sub>23</sub>O<sup>+</sup> (M+H)<sup>+</sup> 351.1743, found 351.1745.

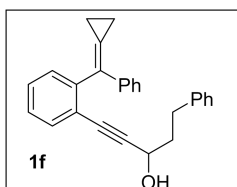

**1-(2-(cyclopropylidene(phenyl)methyl)phenyl)-5-phenylpent-1-yn-3-ol, 1f**, overall yield 55%, light yellow oil; **<sup>1</sup>H NMR (500 MHz, CDCl<sub>3</sub>)**:  $\delta$  = 7.50 (d,  $J$  = 7.5 Hz, 1H), 7.47 - 7.45 (m, 2H), 7.40 - 7.36 (m, 2H), 7.33 - 7.29 (m, 3H), 7.28 - 7.17 (m, 4H), 7.10 - 7.09 (m, 2H), 4.25 (t,  $J$  = 6.5 Hz, 1H), 2.62 - 2.54 (m, 2H), 1.84 - 1.71 (m, 2H), 1.60 - 1.57 (m, 2H), 1.28 - 1.25 (m, 3H); **<sup>13</sup>C NMR (125 MHz, CDCl<sub>3</sub>)**:  $\delta$  = 144.1, 141.5, 140.8, 132.6, 130.4, 129.4, 128.6, 128.5, 128.5, 128.2, 127.2, 127.1, 126.8, 126.2, 126.0, 122.4, 93.7, 85.1, 62.2, 39.0, 31.3, 5.4, 2.3; **HRMS (ESI)**  $m/z$  calcd for C<sub>27</sub>H<sub>25</sub>O<sup>+</sup> (M+H)<sup>+</sup> 365.1900, found 365.1899.

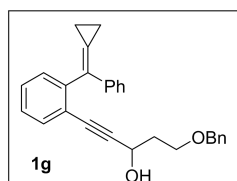

**5-(benzyloxy)-1-(2-(cyclopropylidene(phenyl)methyl)phenyl)pent-1-yn-3-ol, 1g**, overall yield 42%, light yellow oil; **<sup>1</sup>H NMR (500 MHz, CDCl<sub>3</sub>)**:  $\delta$  = 7.50 (d,  $J$  = 7.5 Hz, 1H), 7.44 (d,  $J$  = 7.5

Hz, 2H), 7.38 - 7.26 (m, 10H), 7.21 (t,  $J = 7.0$  Hz, 1H), 4.52 (q,  $J = 5.5$  Hz, 1H), 4.37 (dd,  $J = 19.5, 8.0$  Hz, 2H), 3.59 - 3.54 (m, 1H), 3.46 - 3.42 (m, 1H), 2.45 (d,  $J = 6.0$  Hz, 1H), 1.85 - 1.79 (m, 1H), 1.69 - 1.63 (m, 1H), 1.59 - 1.56 (m, 2H), 1.26 - 1.22 (m, 2H);  $^{13}\text{C}$  NMR (125 MHz,  $\text{CDCl}_3$ ):  $\delta = 143.9, 140.7, 138.1, 132.7, 130.3, 129.2, 128.5, 128.4, 128.2, 127.8, 127.7, 127.1, 127.0, 126.7, 126.2, 122.6, 93.2, 84.7, 73.2, 67.5, 61.6, 36.8, 5.4, 2.3$ ; HRMS (ESI)  $m/z$  calcd for  $\text{C}_{28}\text{H}_{27}\text{O}_2^+$  ( $\text{M}+\text{H}$ ) $^+$  395.2006, found 395.2005.

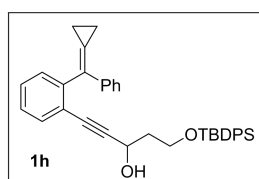

**5-((tert-butyl-diphenylsilyloxy)methyl)-1-(2-(cyclopropylidene(phenyl)methyl)phenyl)pent-1-yn-3-ol, 1h**, overall yield 40%, light yellow oil;  $^1\text{H}$  NMR (500 MHz,  $\text{CDCl}_3$ ):  $\delta = 7.68 - 7.66$  (m, 4H), 7.52 (d,  $J = 7.5$  Hz, 1H), 7.46 - 7.30 (m, 11H), 7.22 (t,  $J =$

7.5 Hz, 2H), 7.15 (t,  $J = 7.0$  Hz, 1H), 4.61 - 4.59 (m, 1H), 3.82 - 3.77 (m, 1H), 3.65 - 3.59 (m, 1H), 2.60 (s, 1H), 1.77 - 1.71 (m, 1H), 1.63 - 1.57 (m, 1H), 1.54 (t,  $J = 7.5$  Hz, 2H), 1.24 - 1.20 (m, 2H), 1.05 (s, 9H);  $^{13}\text{C}$  NMR (125 MHz,  $\text{CDCl}_3$ ):  $\delta = 144.0, 140.7, 135.7, 134.9, 133.3, 133.2, 132.7, 130.4, 129.9, 129.8, 129.7, 129.3, 128.4, 128.1, 127.8, 127.1, 127.0, 126.6, 126.2, 122.6, 93.7, 84.7, 61.6, 61.5, 39.0, 26.9, 19.2, 5.3, 2.3$ ; HRMS (ESI)  $m/z$  calcd for  $\text{C}_{37}\text{H}_{39}\text{O}_2\text{Si}^+$  ( $\text{M}+\text{H}$ ) $^+$  543.2714, found 543.2714.

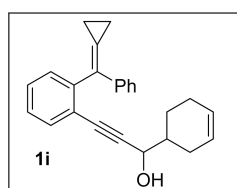

**1-(cyclohex-3-en-1-yl)-3-(2-(cyclopropylidene(phenyl)methyl)phenyl)prop-2-yn-1-ol, 1i**, overall yield 58%, light yellow oil;  $^1\text{H}$  NMR (500 MHz,  $\text{CDCl}_3$ ):  $\delta = 7.53$  (d,  $J = 7.5$  Hz, 1H), 7.48 (d,  $J = 8.0$  Hz, 2H), 7.43 - 7.32 (m, 5H), 7.27 (t,  $J = 7.5$  Hz, 1H),

5.69 - 5.62 (m, 2H), 4.19 - 4.11 (m, 1H), 2.07 - 1.91 (m, 3H), 1.77 - 1.62 (m, 5H), 1.31 - 1.13 (m, 4H);  $^{13}\text{C}$  NMR (125 MHz,  $\text{CDCl}_3$ ): (*isomers*)  $\delta = 144.0, 140.5, 132.6, 130.4, 129.3, 128.5, 128.2, 127.1, 127.0, 127.0, 126.8, 126.7, 126.1, 126.0, 125.9, 122.5, 92.7, 85.4, 66.9, 40.2, 27.3, 25.0, 23.9, 5.5, 2.1$ ; HRMS (ESI)  $m/z$  calcd for  $\text{C}_{25}\text{H}_{25}\text{O}^+$  ( $\text{M}+\text{H}$ ) $^+$  341.1900, found 341.1896.

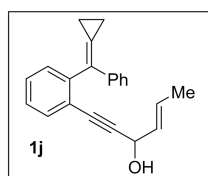

**(E)-1-(2-(cyclopropylidene(phenyl)methyl)phenyl)hex-4-en-1-yn**

**-3-ol, 1j**, overall yield 54%, light yellow oil;  $^1\text{H NMR}$  (500 MHz,  $\text{CDCl}_3$ ): (*E/Z* > 10:1)  $\delta = 7.49$  (d,  $J = 7.5$  Hz, 1H), 7.43 (d,  $J = 7.5$  Hz, 2H), 7.36 - 7.29 (m, 5H), 7.23 (t,  $J = 7.5$  Hz, 1H), 5.67 - 5.60 (m, 1H), 5.37 - 5.32 (m, 1H), 4.68 (t,  $J = 6.0$  Hz, 1H), 1.64 - 1.63 (m, 3H), 1.58 - 1.55 (m, 2H), 1.26 - 1.23 (m, 3H);  $^{13}\text{C NMR}$  (125 MHz,  $\text{CDCl}_3$ ):  $\delta = 144.1, 140.9, 132.6, 130.4, 129.9, 129.3, 128.6, 128.5, 128.2, 127.2, 127.1, 126.7, 126.4, 122.3, 92.3, 85.8, 63.2, 17.6, 5.3, 2.4$ ; **HRMS (ESI)**  $m/z$  calcd for  $\text{C}_{22}\text{H}_{21}\text{O}^+$  ( $\text{M}+\text{H}$ ) $^+$  301.1587, found 301.1586.

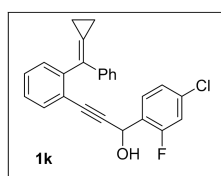

**1-(4-chloro-2-fluorophenyl)-3-(2-(cyclopropylidene(phenyl)methyl)phenyl)prop-2-yn-1-ol, 1k**, overall yield 43%, light yellow oil;  $^1\text{H NMR}$  (500 MHz,  $\text{CDCl}_3$ ):  $\delta = 7.51$  (d,  $J = 7.5$  Hz, 1H), 7.43 (d,  $J = 7.5$  Hz, 2H), 7.40 - 7.35 (m, 2H), 7.33 - 7.29 (m, 4H), 7.24 - 7.21 (m, 1H), 7.20 - 7.17 (m, 1H), 6.95 (t,  $J = 8.0$  Hz, 1H), 5.62 (d,  $J = 6.0$  Hz, 1H), 1.83 (d,  $J = 6.0$  Hz, 1H), 1.57 - 1.50 (m, 2H), 1.22 - 1.19 (m, 2H);  $^{13}\text{C NMR}$  (125 MHz,  $\text{CDCl}_3$ ):  $\delta = 155.66$  ( $J_{\text{CF}} = 250.00$  Hz), 144.3, 140.6, 132.6, 130.6, 130.4, 129.5 ( $J_{\text{CF}} = 12.5$  Hz), 129.1, 129.0, 128.3, 127.1, 127.1, 126.8, 126.8, 126.5, 124.7 ( $J_{\text{CF}} = 3.75$  Hz), 121.9, 121.2 ( $J_{\text{CF}} = 17.50$  Hz), 90.7, 86.8, 59.2 ( $J_{\text{CF}} = 5.00$  Hz), 5.4, 2.2; **HRMS (ESI)**  $m/z$  calcd for  $\text{C}_{25}\text{H}_{19}\text{ClFO}^+$  ( $\text{M}+\text{H}$ ) $^+$  389.1103, found 389.1104.

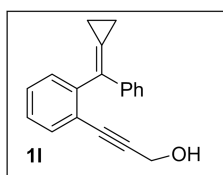

**3-(2-(cyclopropylidene(phenyl)methyl)phenyl)prop-2-yn-1-ol, 1l**, overall yield 53%, light yellow oil;  $^1\text{H NMR}$  (500 MHz,  $\text{CDCl}_3$ ):  $\delta = 7.47 - 7.43$  (m, 3H), 7.38 - 7.27 (m, 5H), 7.26 - 7.23 (m, 1H), 4.10 (d,  $J = 5.5$  Hz, 2H), 1.60 - 1.57 (m, 2H), 1.29 - 1.26 (m, 2H), 0.91 (t,  $J = 6.0$  Hz, 1H);  $^{13}\text{C NMR}$  (125 MHz,  $\text{CDCl}_3$ ):  $\delta = 144.1, 141.1, 132.5, 130.4, 129.3, 128.5, 128.2, 127.4, 127.1, 126.7, 126.6, 122.3, 91.3, 85.7, 51.5, 5.2, 2.5$ ; **HRMS (ESI)**  $m/z$  calcd for  $\text{C}_{19}\text{H}_{17}\text{O}^+$  ( $\text{M}+\text{H}$ ) $^+$ : 261.1274, found: 261.1276

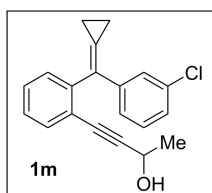

**4-(2-((3-chlorophenyl)(cyclopropylidene)methyl)phenyl)but-3-yn-2-ol, 1m**, overall yield 39%, light yellow oil;  $^1\text{H NMR}$  (500 MHz,  $\text{CDCl}_3$ ):  $\delta = 7.48$  (d,  $J = 7.5$  Hz, 2H), 7.42 (s, 1H), 7.38 -

7.26 (m, 4H), 7.24 - 7.20 (m, 2H), 4.42 (q,  $J = 5.5$  Hz, 1H), 1.61 - 1.56 (m, 3H), 1.28 - 1.25 (m, 2H), 1.21 (d,  $J = 6.5$  Hz, 3H);  $^{13}\text{C}$  NMR (125 MHz,  $\text{CDCl}_3$ ):  $\delta = 143.2, 142.7, 134.2, 132.7, 130.3, 129.4, 128.5, 128.4, 127.8, 127.3, 127.2, 126.6, 125.3, 122.4, 95.1, 83.6, 58.7, 24.1, 5.3, 2.5$ ; HRMS (ESI)  $m/z$  calcd for  $\text{C}_{20}\text{H}_{18}\text{ClO}^+$  ( $\text{M}+\text{H}$ ) $^+$  309.1041, found 309.1045.

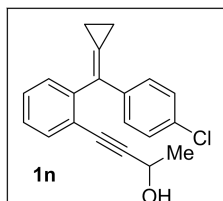

**4-(2-((4-chlorophenyl)(cyclopropylidene)methyl)phenyl)but-3-yn-2-ol, 1n**, overall yield 31%, light yellow oil;  $^1\text{H}$  NMR (500 MHz,  $\text{CDCl}_3$ ):  $\delta = 7.48$  (d,  $J = 7.0$  Hz, 1H), 7.37 - 7.34 (m, 3H), 7.32 - 7.27 (m, 4H), 4.42 (q,  $J = 5.5$  Hz, 1H), 1.72 (s, 1H), 1.59 - 1.55 (m, 2H), 1.27 - 1.24 (m, 2H), 1.21 (d,  $J = 6.5$  Hz, 3H);  $^{13}\text{C}$  NMR (125 MHz,  $\text{CDCl}_3$ ):  $\delta = 143.4, 139.2, 132.7, 132.4, 130.2, 128.5, 128.4, 128.3, 128.3, 127.2, 126.8, 122.4, 94.9, 83.6, 58.7, 24.0, 5.3, 2.4$ ; HRMS (ESI)  $m/z$  calcd for  $\text{C}_{20}\text{H}_{18}\text{ClO}^+$  ( $\text{M}+\text{H}$ ) $^+$  309.1041, found 309.1045.

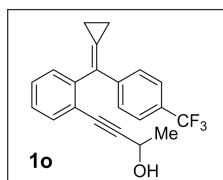

**4-(2-(cyclopropylidene(4-(trifluoromethyl)phenyl)methyl)phenyl)but-3-yn-2-ol, 1o**, overall yield 23%, light yellow oil;  $^1\text{H}$  NMR (500 MHz,  $\text{CDCl}_3$ ):  $\delta = 7.56$  (d,  $J = 8.5$  Hz, 2H), 7.52 (d,  $J = 8.5$  Hz, 2H), 7.48 (d,  $J = 8.0$  Hz, 1H), 7.39 - 7.36 (m, 1H), 7.33 - 7.29 (m, 2H), 4.39 (q,  $J = 6.5$  Hz, 1H), 1.63 - 1.60 (m, 2H), 1.42 (brs, 1H), 1.31 - 1.26 (m, 2H), 1.15 (d,  $J = 6.5$  Hz, 3H);  $^{13}\text{C}$  NMR (125 MHz,  $\text{CDCl}_3$ ): (one carbon merged to others)  $\delta = 144.2, 143.1, 132.8, 130.3, 129.0, 128.7, 128.6$  (q,  $J_{\text{CF}} = 16.25$  Hz), 127.5, 127.3, 125.1 (q,  $J_{\text{CF}} = 3.75$  Hz), 124.5 (q,  $J_{\text{CF}} = 270.0$  Hz), 122.4, 95.1, 83.6, 58.7, 24.0, 5.4, 2.6;  $^{19}\text{F}$  NMR (470 MHz,  $\text{CDCl}_3$ )  $\delta = -62.3$ ; HRMS (ESI)  $m/z$  calcd for  $\text{C}_{21}\text{H}_{18}\text{F}_3\text{O}^+$  ( $\text{M}+\text{H}$ ) $^+$  343.1304, found 343.1306

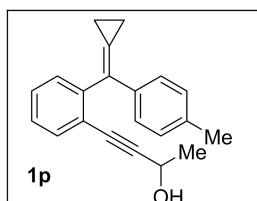

**4-(2-(cyclopropylidene(p-tolyl)methyl)phenyl)but-3-yn-2-ol, 1p**, overall yield 48%, light yellow oil;  $^1\text{H}$  NMR (500 MHz,  $\text{CDCl}_3$ ):  $\delta = 7.46$  (d,  $J = 7.5$  Hz, 1H), 7.36 - 7.26 (m, 5H), 7.14 (d,  $J = 8.0$  Hz, 2H), 4.38 (q,  $J = 6.5$  Hz, 1H), 2.35 (s, 3H), 1.60

- 1.55 (m, 2H), 1.29 - 1.23 (m, 3H), 1.21 (t,  $J = 6.5$  Hz, 3H);  $^{13}\text{C}$  NMR (125 MHz,  $\text{CDCl}_3$ ):  $\delta = 144.2, 138.2, 136.4, 132.5, 130.4, 129.2, 128.9, 128.4, 127.2, 127.0, 125.3, 122.3, 94.9, 84.0, 58.7, 24.0, 21.2, 5.2, 2.4$ ; HRMS (ESI)  $m/z$  calcd for  $\text{C}_{21}\text{H}_{21}\text{O}^+$  ( $\text{M}+\text{H}$ ) $^+$  289.1587, found 289.1589.

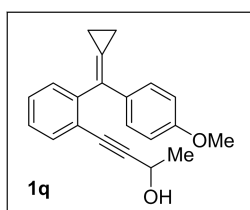

**4-(2-(cyclopropylidene(p-tolyl)methyl)phenyl)but-3-yn-2-ol, 1q**, overall yield 43%, light yellow oil;  $^1\text{H}$  NMR (500 MHz,  $\text{CDCl}_3$ ):  $\delta = 7.46$  (d,  $J = 8.0$  Hz, 1H), 7.37 - 7.33 (m, 4H), 7.29 - 7.25 (m, 1H), 6.87 - 6.85 (m, 2H), 4.41 (q,  $J = 6.5$  Hz, 1H), 3.80

(s, 3H), 1.56 - 1.53 (m, 2H), 1.41 (s, 1H), 1.24 - 1.22 (m, 5H);  $^{13}\text{C}$  NMR (125 MHz,  $\text{CDCl}_3$ ):  $\delta = 158.6, 144.3, 133.7, 132.5, 130.3, 128.8, 128.4, 128.4, 127.0, 124.1, 122.4, 113.6, 94.8, 83.9, 58.8, 55.5, 24.1, 5.1, 2.4$ ; HRMS (ESI)  $m/z$  calcd for  $\text{C}_{21}\text{H}_{21}\text{O}_2^+$  ( $\text{M}+\text{H}$ ) $^+$  305.1536, found 305.1534.

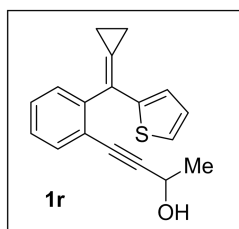

**4-(2-(cyclopropylidene(thiophen-2-yl)methyl)phenyl)but-3-yn-2-ol, 1r**, overall yield 53%, white solid;  $^1\text{H}$  NMR (500 MHz,  $\text{CDCl}_3$ ):  $\delta = 7.50$  (d,  $J = 7.5$  Hz, 1H), 7.40 - 7.34 (m, 2H), 7.30 (t,  $J = 7.0$  Hz, 1H), 7.21 (d,  $J = 5.0$  Hz, 1H), 6.95 (t,  $J = 4.5$  Hz, 1H),

6.72 (d,  $J = 3.0$  Hz, 1H), 4.51 - 4.46 (m, 1H), 1.73 (d,  $J = 5.0$  Hz, 1H), 1.56 - 1.53 (m, 2H), 1.35 - 1.32 (m, 2H), 1.29 (d,  $J = 6.5$  Hz, 3H);  $^{13}\text{C}$  NMR (125 MHz,  $\text{CDCl}_3$ ):  $\delta = 145.9, 142.9, 132.5, 129.8, 128.3, 127.4, 127.0, 125.1, 124.7, 124.6, 124.2, 122.4, 94.7, 83.5, 58.7, 24.2, 5.6, 3.9$ ; HRMS (ESI)  $m/z$  calcd for  $\text{C}_{18}\text{H}_{17}\text{OS}^+$  ( $\text{M}+\text{H}$ ) $^+$  281.0995, found 281.0992.

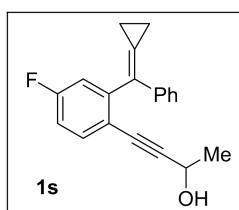

**4-(2-(cyclopropylidene(phenyl)methyl)-4-fluorophenyl)but-3-yn-2-ol, 1s**, overall yield 44%, light yellow oil;  $^1\text{H}$  NMR (500 MHz,  $\text{CDCl}_3$ ):  $\delta = 7.46 - 7.44$  (m, 3H), 7.34 (t,  $J = 7.5$  Hz, 2H), 7.26 (t,  $J = 7.5$  Hz, 1H), 7.11 - 7.09 (m, 1H), 7.00 (td,  $J = 2.5, 8.5$

Hz, 1H), 4.37 - 4.33 (m, 1H), 1.62 - 1.59 (m, 3H), 1.31 - 1.28 (m, 2H), 1.18 (d,  $J = 7.0$  Hz, 3H);  $^{13}\text{C}$  NMR (125 MHz,  $\text{CDCl}_3$ ):  $\delta = 162.4$  ( $J_{\text{CF}} = 247.5$  Hz), 146.3 ( $J_{\text{CF}} = 7.5$

Hz), 140.2 ( $J_{CF} = 8.75$  Hz), 134.3, 128.6 ( $J_{CF} = 2.5$  Hz), 128.2, 127.2, 127.2, 126.8, 118.5, 117.3 ( $J_{CF} = 22.5$  Hz), 114.3 ( $J_{CF} = 21.25$  Hz), 94.7, 82.8, 58.5, 23.9, 5.2, 2.4; **HRMS (ESI)**  $m/z$  calcd for  $C_{20}H_{18}FO^+$  ( $M+H$ ) $^+$  293.1336, found 293.1336.

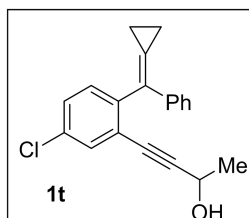

**4-(5-chloro-2-(cyclopropylidene(phenyl)methyl)phenyl)but-3-yn-2-ol, 1t**, overall yield 46%, light yellow oil;  **$^1H$  NMR (500 MHz,  $CDCl_3$ )**:  $\delta = 7.48$  (d,  $J = 6.5$  Hz, 1H), 7.42 (t,  $J = 1.5$  Hz, 1H), 7.38 - 7.28 (m, 4H), 7.24 - 7.19 (m, 2H), 4.43 (q,  $J = 6.5$

Hz, 1H), 1.61 - 1.58 (m, 2H), 1.55 (br, 1H), 1.28 - 1.25 (m, 2H), 1.21 (d,  $J = 6.5$  Hz, 3H);  **$^{13}C$  NMR (125 MHz,  $CDCl_3$ )**:  $\delta = 143.2, 142.7, 134.2, 132.7, 130.3, 129.4, 128.5, 128.3, 127.8, 127.3, 127.2, 126.6, 125.3, 122.4, 95.1, 83.6, 58.7, 24.1, 5.3, 2.5$ ; **HRMS (ESI)**  $m/z$  calcd for  $C_{20}H_{18}ClO^+$  ( $M+H$ ) $^+$  309.1041, found 309.1046.

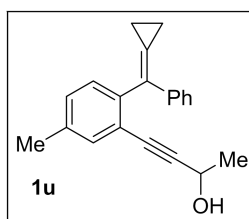

**4-(2-(cyclopropylidene(phenyl)methyl)-5-methylphenyl)but-3-yn-2-ol, 1u**, overall yield 46%, light yellow oil;  **$^1H$  NMR (500 MHz,  $CDCl_3$ )**:  $\delta = 7.47$  (d,  $J = 7.5$  Hz, 2H), 7.35 - 7.32 (m, 3H), 7.29 - 7.18 (m, 3H), 4.38 (q,  $J = 6.5$  Hz, 1H), 2.38 (s, 3H),

1.61 - 1.58 (m, 2H), 1.48 (br, 1H), 1.29 - 1.26 (m, 2H), 1.20 (d,  $J = 6.5$  Hz, 3H);  **$^{13}C$  NMR (125 MHz,  $CDCl_3$ )**:  $\delta = 141.1, 141.0, 136.7, 133.0, 130.3, 129.3, 129.2, 128.1, 127.3, 126.6, 125.9, 122.1, 94.7, 84.0, 58.6, 24.0, 21.0, 5.2, 2.4$ ; **HRMS (ESI)**  $m/z$  calcd for  $C_{21}H_{21}O_2^+$  ( $M+H$ ) $^+$ : 289.1587, found: 289.1588.

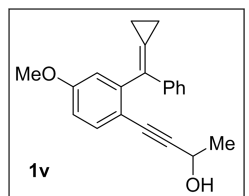

**4-(2-(cyclopropylidene(phenyl)methyl)-4-methoxyphenyl)but-3-yn-2-ol, 1v**, overall yield 44%, light yellow oil;  **$^1H$  NMR (500 MHz,  $CDCl_3$ )**:  $\delta = 7.46$  (d,  $J = 7.5$  Hz, 2H), 7.40 (d,  $J = 8.5$  Hz, 1H), 7.33 (t,  $J = 8.0$  Hz, 2H), 7.24 (t,  $J = 7.5$  Hz, 1H), 6.92

(d,  $J = 2.5$  Hz, 1H), 6.84 (dd,  $J = 8.5, 2.5$  Hz, 1H), 4.36 (q,  $J = 6.5$  Hz, 1H), 3.82 (s, 3H), 1.61 - 1.58 (m, 2H), 1.43 (br, 1H), 1.30 - 1.26 (m, 2H), 1.18 (d,  $J = 7.0$  Hz, 3H);  **$^{13}C$  NMR (125 MHz,  $CDCl_3$ )**:  $\delta = 159.6, 145.6, 140.7, 133.8, 129.4, 128.1, 127.2, 126.7, 126.2, 115.9, 114.7, 112.8, 93.5, 83.7, 58.7, 55.4, 24.0, 5.3, 2.4$ ; **HRMS (ESI)**

$m/z$  calcd for  $C_{21}H_{21}O_2^+$  ( $M+H$ ) $^+$  305.1536, found 305.1538.

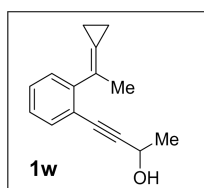

**4-(2-(1-cyclopropylideneethyl)phenyl)but-3-yn-2-ol, 1w**, overall yield 43%, light yellow oil;  $^1H$  NMR (500 MHz,  $CDCl_3$ ):  $\delta$  = 7.45 (d,  $J$  = 8.0 Hz, 1H), 7.30 - 7.26 (m, 2H), 7.20 - 7.17 (m, 1H), 4.72 (q,  $J$  = 6.5 Hz, 1H), 2.27 (t,  $J$  = 3.5 Hz, 3H), 2.14 (brs, 1H), 1.51 (d,  $J$  = 6.5 Hz, 3H), 1.22 - 1.18 (m, 4H);  $^{13}C$  NMR (125 MHz,  $CDCl_3$ ):  $\delta$  = 145.9, 133.1, 128.3, 128.3, 126.4, 124.4, 123.0, 120.7, 93.7, 84.3, 59.0, 24.4, 21.8, 4.8, 2.4; HRMS (ESI)  $m/z$  calcd for  $C_{15}H_{17}O^+$  ( $M+H$ ) $^+$  213.1274, found 213.1273

### Procedure 3

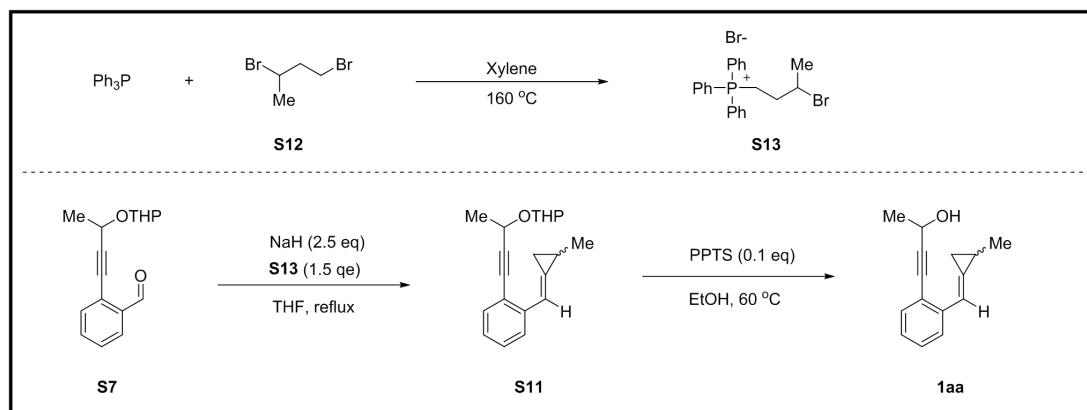

Figure S3. Procedure 3

To a solution of  $Ph_3P$  (1 eq) in Xylene was added **S13**, then the mixture was heated at 160 °C for 12 h. After cold to rt, the white solid was filtered, washed with  $Et_2O$  and dried to get the desired product **S13**.

**S13** (1.5 eq) was suspended in dry THF and NaH (2.5 eq) was added to the above reaction mixture in one portion at room temperature. The resulting mixture was heated at 70 °C for 18 h under a nitrogen atmosphere, then **S7** (1.0 eq) dissolved in 10 mL dry THF was added to the above mixture dropwise within 5 min. The mixture was heated at at 70 °C for another 4 h. Upon completion, the reaction was quenched with saturated  $NH_4Cl$  solution, extracted with  $EtOAc$ , washed with brine, dried over  $Na_2SO_4$ , filtered, and concentrated to get the crude product which was purified by chromatography to get the desired compound **S11**.

To a solution of **S11** (1 eq) in EtOH was added PPTS (0.1 eq) at room temperature, the resulting mixture was heated at 60 °C for 8 hours. Upon completion, the reaction was quenched with saturated NaHCO<sub>3</sub> solution, and evaporated nearly to dry, diluted with water, extracted with EtOAc, washed with brine, dried over Na<sub>2</sub>SO<sub>4</sub>, filtered, and concentrated to get the crude product which was purified by chromatography to get the desired compound **1aa**.

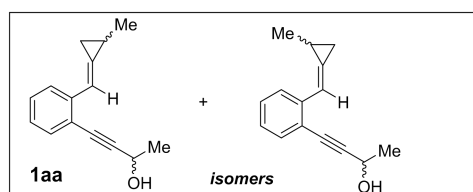

**1aa**, overall yield 35%, light yellow oil; <sup>1</sup>H NMR (500 MHz, CDCl<sub>3</sub>, major isomer): δ = 7.41 - 7.39 (m, 1H), 7.29 - 7.24 (m, 2H), 7.15 - 7.11 (m, 1H), 6.32 - 6.25 (m, 1H), 4.82 - 4.78 (m, 1H), 2.07 (brs, 1H), 1.88 (dd, *J* = 5.5, 1.5 Hz, 1H), 1.85 (d, *J* = 7.0 Hz, 3H), 1.60 - 1.58 (m, 3H), 1.57 - 1.54 (m, 2H); <sup>13</sup>C NMR (125 MHz, CDCl<sub>3</sub>): δ = 139.2, 132.9, 132.2, 131.2, 128.6, 127.6, 126.8, 124.5, 95.8, 82.7, 59.1, 33.1, 24.6, 18.5, 13.6.; HRMS (ESI) *m/z* calcd for C<sub>15</sub>H<sub>17</sub>O<sup>+</sup> (M+H)<sup>+</sup> 213.1274, found 213.1275

#### 4. General procedure of the gold catalysis

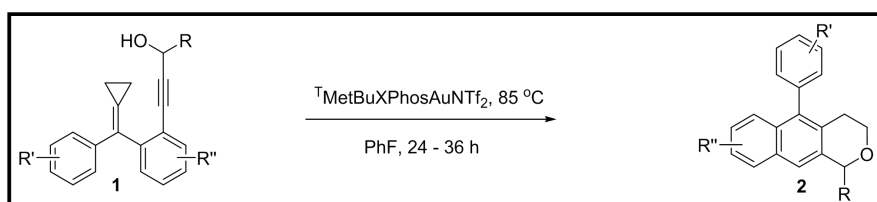

Figure S4. Procedure of gold catalysis

A dry schlenk tube was charged with <sup>1</sup>Me<sup>4</sup>BuXPhosAuNTf<sub>2</sub> (5 mol %), then ynone **1** dissolved in anhydrous PhF (4 mL) was added. Then the tube was sealed and stirred at 85 °C until the reaction was complete, as monitored by thin layer chromatography. The reaction mixture was purified by chromatography to get the desired compound **2**.

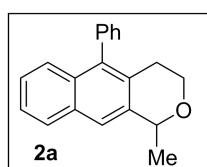

**1-methyl-5-phenyl-3,4-dihydro-1H-benzo[g]isochromene, 2a,**



yield 83%, 45.5 mg, light yellow oil; **<sup>1</sup>H NMR (500 MHz, CDCl<sub>3</sub>):**  $\delta$  = 7.83 (d,  $J$  = 7.5 Hz, 1H), 7.65 (s, 1H), 7.54 - 7.51 (m, 2H), 7.48 - 7.39 (m, 3H), 7.33 - 7.27 (m, 3H), 5.10 (q,  $J$  = 6.5 Hz, 1H), 4.16 - 4.12 (m, 1H), 3.81 (td,  $J$  = 11.0, 4.0 Hz, 1H), 2.91 - 2.85 (m, 1H), 2.54 (dt,  $J$  = 17.0, 3.5 Hz, 1H), 1.75 (d,  $J$  = 6.5 Hz, 3H); **<sup>13</sup>C NMR (125 MHz, CDCl<sub>3</sub>):**  $\delta$  = 139.2, 138.4, 138.1, 132.1, 131.6, 130.2, 130.0, 128.8, 128.6, 127.7, 127.3, 126.1, 125.6, 125.4, 123.1, 73.1, 64.3, 28.9, 22.4; **HRMS (ESI)**  $m/z$  calcd for C<sub>20</sub>H<sub>19</sub>O<sup>+</sup> (M+H)<sup>+</sup> 275.1430, found 275.1429.

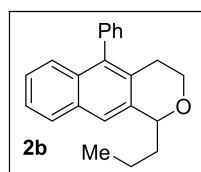

**5-phenyl-1-propyl-3,4-dihydro-1H-benzo[g]isochromene, 2b,**

yield 81%, 49 mg, light yellow oil; **<sup>1</sup>H NMR (500 MHz, CDCl<sub>3</sub>):**  $\delta$  = 7.82 (d,  $J$  = 7.5 Hz, 1H), 7.65 (s, 1H), 7.53 - 7.51 (m, 2H), 7.47 - 7.38 (m, 3H), 7.32 - 7.29 (m, 2H), 7.27 - 7.26 (m, 1H), 5.01 (dd,  $J$  = 9.0, 3.5 Hz, 1H), 4.13 - 4.09 (m, 1H), 3.76 (td,  $J$  = 10.0, 4.0 Hz, 1H), 2.85 - 2.79 (m, 1H), 2.53 (dt,  $J$  = 16.5, 4.0 Hz, 1H), 2.12 - 2.06 (m, 1H), 2.03 - 1.95 (m, 1H), 1.65 - 1.57 (m, 2H), 1.04 (t,  $J$  = 7.5 Hz, 3H); **<sup>13</sup>C NMR (125 MHz, CDCl<sub>3</sub>):**  $\delta$  = 139.2, 138.4, 137.2, 132.0, 131.5, 130.6, 130.3, 130.2, 128.7, 128.6, 127.7, 127.3, 126.1, 125.6, 125.4, 123.2, 76.4, 63.6, 38.9, 29.0, 18.8, 14.3; **HRMS (ESI)**  $m/z$  calcd for C<sub>22</sub>H<sub>23</sub>O<sup>+</sup> (M+H)<sup>+</sup> 303.1743, found 303.1742.

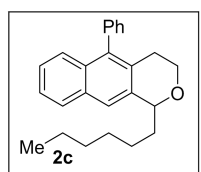

**1-hexyl-5-phenyl-3,4-dihydro-1H-benzo[g]isochromene, 2c,** yield

95%, 65 mg, light yellow oil; **<sup>1</sup>H NMR (500 MHz, CDCl<sub>3</sub>):**  $\delta$  = 7.83 (d,  $J$  = 7.5 Hz, 1H), 7.66 (s, 1H), 7.54 - 7.51 (m, 2H), 7.48 - 7.39 (m, 3H), 7.33 - 7.26 (m, 3H), 5.01 (dd,  $J$  = 7.5 Hz, 1H), 4.14 - 4.11 (m, 1H), 3.79 - 3.74 (m, 1H), 2.87 - 2.80 (m, 1H), 2.56 - 2.53 (m, 1H), 2.16 - 2.09 (m, 1H), 2.03 - 1.97 (m, 1H), 1.63 - 1.58 (m, 2H), 1.50 - 1.36 (m, 6H), 0.94 (t,  $J$  = 6.0 Hz, 3H); **<sup>13</sup>C NMR (125 MHz, CDCl<sub>3</sub>):**  $\delta$  = 139.2, 138.4, 137.2, 132.0, 131.5, 130.5, 130.3, 130.2, 128.7, 128.6, 127.7, 127.3, 126.1, 125.6, 125.3, 123.2, 76.6, 63.7, 36.8, 32.0, 29.6, 29.0, 25.5, 22.8, 14.3; **HRMS (ESI)**  $m/z$  calcd for C<sub>25</sub>H<sub>29</sub>O<sup>+</sup> (M+H)<sup>+</sup> 345.2213, found 345.2217.

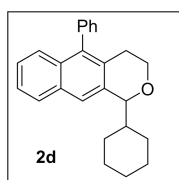

**1-cyclohexyl-5-phenyl-3,4-dihydro-1H-benzo[g]isochromene, 2d,**

yield 98%, 67 mg, light yellow oil;  $^1\text{H NMR}$  (500 MHz,  $\text{CDCl}_3$ ):  $\delta$  = 7.85 (d,  $J$  = 8.5 Hz, 1H), 7.68 (s, 1H), 7.55 - 7.51 (m, 2H), 7.48 - 7.43 (m, 3H), 7.35 - 7.27 (m, 3H), 4.92 (s, 1H), 4.16 - 4.13 (m, 1H), 3.68 (t,  $J$  = 11.0 Hz, 1H), 2.89 - 2.82 (m, 1H), 2.45 (d,  $J$  = 16.5 Hz, 1H), 2.08 (t,  $J$  = 11.5 Hz, 1H), 1.89 (t,  $J$  = 12.0 Hz, 2H), 1.73 - 1.60 (m, 3H), 1.47 - 1.19 (m, 5H);  $^{13}\text{C NMR}$  (125 MHz,  $\text{CDCl}_3$ ):  $\delta$  = 139.1, 138.1, 136.1, 132.0, 131.7, 131.3, 130.5, 130.2, 128.7, 128.5, 127.8, 127.3, 126.1, 125.5, 125.3, 123.3, 80.9, 64.4, 44.7, 30.6, 29.2, 27.1, 26.7, 26.6, 25.8; **HRMS (ESI)**  $m/z$  calcd for  $\text{C}_{25}\text{H}_{27}\text{O}^+$  ( $\text{M}+\text{H}$ ) $^+$  343.2056, found 343.2055.

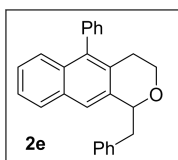

**1-benzyl-5-phenyl-3,4-dihydro-1H-benzo[g]isochromene, 2e**, yield 90%, 63.1 mg, colorless oil;  $^1\text{H NMR}$  (500 MHz,  $\text{CDCl}_3$ ):  $\delta$  = 7.84 (d,  $J$  = 8.0 Hz, 1H), 7.71 (s, 1H), 7.56 - 7.52 (m, 2H), 7.48 - 7.42 (m, 3H), 7.37 - 7.33 (m, 5H), 7.31 - 7.27 (m, 3H), 5.32 - 5.30 (m, 1H), 4.14 - 4.10 (m, 1H), 3.77 - 3.72 (m, 1H), 3.46 (dd,  $J$  = 14.0, 3.0 Hz, 1H), 3.27 - 3.23 (m, 1H), 2.79 - 2.73 (m, 1H), 2.55 (dt,  $J$  = 16.5, 3.5 Hz, 1H);  $^{13}\text{C NMR}$  (125 MHz,  $\text{CDCl}_3$ ):  $\delta$  = 139.0, 138.9, 138.5, 136.3, 131.9, 131.6, 130.7, 130.2, 130.2, 129.7, 128.7, 128.6, 128.4, 127.7, 127.4, 126.4, 126.1, 125.7, 125.4, 123.6, 77.4, 63.4, 43.4, 28.9; **HRMS (ESI)**  $m/z$  calcd for  $\text{C}_{26}\text{H}_{23}\text{O}^+$  ( $\text{M}+\text{H}$ ) $^+$  351.1743, found 351.1741.

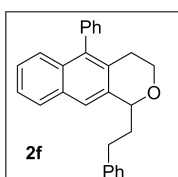

**1-phenethyl-5-phenyl-3,4-dihydro-1H-benzo[g]isochromene, 2f**, yield 97%, 70.7 mg, light yellow oil;  $^1\text{H NMR}$  (500 MHz,  $\text{CDCl}_3$ ):  $\delta$  = 7.84 (d,  $J$  = 8.5 Hz, 1H), 7.67 (s, 1H), 7.58 - 7.55 (m, 2H), 7.51 - 7.43 (m, 3H), 7.39 - 7.30 (m, 7H), 7.28 - 7.25 (m, 1H), 5.06 (d,  $J$  = 10.5 Hz, 1H), 4.23 - 4.19 (m, 1H), 3.84 (td,  $J$  = 10.0, 4.0 Hz, 1H), 3.01 - 2.88 (m, 3H), 2.60 (dt,  $J$  = 16.5, 3.5 Hz, 1H), 2.54 - 2.46 (m, 1H), 2.40 - 2.33 (m, 1H);  $^{13}\text{C NMR}$  (125 MHz,  $\text{CDCl}_3$ ):  $\delta$  = 142.5, 139.1, 138.5, 136.7, 132.0, 131.5, 130.4, 130.2, 130.2, 128.7, 128.7, 128.6, 128.5, 127.7, 127.3, 126.1, 125.9, 125.6, 125.4, 123.1, 75.8, 63.7, 38.4, 31.7, 28.9; **HRMS (ESI)**  $m/z$  calcd for  $\text{C}_{27}\text{H}_{25}\text{O}^+$  ( $\text{M}+\text{H}$ ) $^+$  365.1900, found 365.1899.

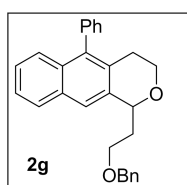

**1-(2-(benzyloxy)ethyl)-5-phenyl-3,4-dihydro-1H-benzo[g]isochromene, 2g**

mene, **2g**, yield 93%, 73.2 mg, light yellow oil;  $^1\text{H NMR}$  (500 MHz,  $\text{CDCl}_3$ ):  $\delta$  = 7.82 (d,  $J$  = 8.5 Hz, 1H), 7.69 (s, 1H), 7.54 (d,  $J$  = 7.5 Hz, 2H), 7.48 - 7.37 (m, 7H), 7.34 - 7.28 (m, 4H), 5.21 - 5.18 (m, 1H), 4.65 - 4.60 (m, 2H), 4.12 - 4.08 (m, 1H), 3.91 - 3.86 (m, 1H), 3.80 - 3.74 (m, 2H), 2.86 - 2.79 (m, 1H), 2.58 - 2.51 (m, 2H), 2.30 - 2.23 (m, 1H);  $^{13}\text{C NMR}$  (125 MHz,  $\text{CDCl}_3$ ):  $\delta$  = 139.1, 138.8, 138.4, 136.6, 132.0, 131.5, 130.3, 130.2, 128.7, 128.6, 128.5, 127.8, 127.8, 127.6, 127.3, 126.0, 125.7, 125.4, 123.3, 73.8, 73.3, 67.2, 63.6, 36.9, 28.9; **HRMS (ESI)**  $m/z$  calcd for  $\text{C}_{28}\text{H}_{27}\text{O}_2^+$  ( $\text{M}+\text{H}$ ) $^+$  395.2006, found 395.2007.

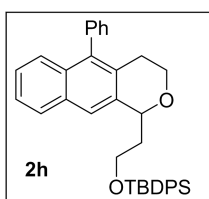

**tert-butyldiphenyl(2-(5-phenyl-3,4-dihydro-1H-benzo[g]isochromen-1-yl)ethoxy)silane, 2h**, yield 94%, 102 mg, light yellow oil;  $^1\text{H NMR}$  (500 MHz,  $\text{CDCl}_3$ ):  $\delta$  = 7.84 (d,  $J$  = 8.0 Hz, 1H), 7.80 - 7.78 (m, 4H), 7.65 (s, 1H), 7.55 - 7.52 (m, 2H), 7.49 - 7.40 (m, 9H),

7.35 - 7.28 (m, 3H), 5.26 - 5.23 (m, 1H), 4.16 - 4.11 (m, 1H), 4.08 - 4.04 (m, 1H), 4.00 - 3.96 (m, 1H), 3.78 - 3.73 (m, 1H), 2.83 - 2.77 (m, 1H), 2.59 - 2.54 (m, 1H), 2.50 - 2.43 (m, 1H), 2.21 - 2.14 (m, 1H), 1.15 (s, 9H);  $^{13}\text{C NMR}$  (125 MHz,  $\text{CDCl}_3$ ):  $\delta$  = 139.2, 138.4, 137.0, 135.8, 135.8, 134.3, 134.1, 132.0, 131.6, 130.3, 130.2, 130.2, 129.7, 129.7, 128.7, 128.6, 127.8, 127.8, 127.7, 127.3, 126.1, 125.6, 125.4, 123.2, 73.3, 63.4, 60.7, 39.5, 28.8, 27.1, 19.4; **HRMS (ESI)**  $m/z$  calcd for  $\text{C}_{37}\text{H}_{39}\text{O}_2\text{Si}^+$  ( $\text{M}+\text{H}$ ) $^+$  543.2714, found 543.2714.

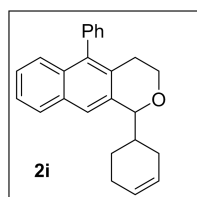

**1-(cyclohex-3-en-1-yl)-5-phenyl-3,4-dihydro-1H-benzo[g]isochromene, 2i**, yield 95%, 64.5 mg, light yellow oil;  $^1\text{H NMR}$  (500 MHz,  $\text{CDCl}_3$ ):  $\delta$  = 7.82 (t,  $J$  = 7.0 Hz, 1H), 7.68 (d,  $J$  = 4.5 Hz, 1H), 7.54 - 7.50 (m, 2H), 7.47 - 7.40 (m, 3H), 7.34 - 7.29 (m, 2H), 7.27 - 7.26

(m, 1H), 5.81 - 5.62 (m, 2H), 5.00 - 4.98 (m, 1H), 4.16 - 4.12 (m, 1H), 3.72 - 3.65 (m, 1H), 2.89 - 2.81 (m, 1H), 2.47 - 2.17 (m, 4H), 2.08 - 1.50 (m, 4H);  $^{13}\text{C NMR}$  (125 MHz,  $\text{CDCl}_3$ ): (*isomers*)  $\delta$  = 139.1, 138.2, 135.7, 132.1, 131.7, 131.4, 130.5, 130.2, 128.7, 128.5, 127.8, 127.3, 127.2, 126.7, 126.1, 125.6, 125.4, 123.4, 80.4, 64.5, 40.2, 29.1, 26.8, 26.3, 24.8; **HRMS (ESI)**  $m/z$  calcd for  $\text{C}_{25}\text{H}_{25}\text{O}^+$  ( $\text{M}+\text{H}$ ) $^+$  341.1900, found

341.1893.

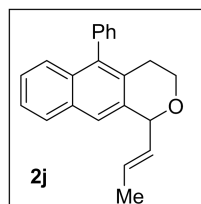

**(E)-5-phenyl-1-(prop-1-en-1-yl)-3,4-dihydro-1H-benzo[g]isochromene, 2j**, yield 68% (52% conversion), 21.4 mg, light yellow oil; **<sup>1</sup>H NMR (500 MHz, CDCl<sub>3</sub>)**:  $\delta$  = 7.81 (d,  $J$  = 8.5 Hz, 1H), 7.59 (s, 1H), 7.53 - 7.50 (m, 2H), 7.46 - 7.36 (m, 3H), 7.32 - 7.26 (m, 3H), 6.02 - 5.95 (m, 1H), 5.80 - 5.73 (m, 1H), 5.33 (d,  $J$  = 8.0 Hz, 1H), 4.16 - 4.12 (m, 1H), 3.83 (td,  $J$  = 11.5, 4.0 Hz, 1H), 2.87 - 2.80 (m, 1H), 2.54 (dt,  $J$  = 7.5, 4.0 Hz, 1H), 1.88 (d,  $J$  = 6.5 Hz, 3H); **<sup>13</sup>C NMR (125 MHz, CDCl<sub>3</sub>)**:  $\delta$  = 139.1, 138.5, 135.5, 131.9, 131.8, 131.6, 131.2, 130.2, 130.2, 130.0, 128.8, 128.6, 127.8, 127.4, 126.1, 125.7, 125.4, 124.7, 78.9, 64.1, 28.6, 18.1; **HRMS (ESI)**  $m/z$  calcd for C<sub>22</sub>H<sub>21</sub>O<sup>+</sup> (M+H)<sup>+</sup> 301.1587, found 301.1583.

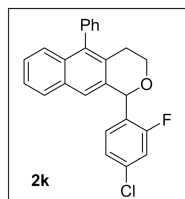

**1-(4-chloro-2-fluorophenyl)-5-phenyl-3,4-dihydro-1H-benzo[g]isochromene, 2k**, yield 72%, 55.9 mg, light yellow oil; **<sup>1</sup>H NMR (500 MHz, CDCl<sub>3</sub>)**:  $\delta$  = 7.70 (d,  $J$  = 8.0 Hz, 1H), 7.57 - 7.54 (m, 2H), 7.50 - 7.47 (m, 1H), 7.44 - 7.29 (m, 7H), 7.26 - 7.23 (m, 1H), 7.09 (t,  $J$  = 8.0 Hz, 1H), 6.35 (s, 1H), 4.22 - 4.18 (m, 1H), 3.96 (td,  $J$  = 10.5, 4.0 Hz, 1H), 3.04 - 2.97 (m, 1H), 2.66 (dt,  $J$  = 17.0, 3.5 Hz, 1H); **<sup>13</sup>C NMR (125 MHz, CDCl<sub>3</sub>)**: (*one carbon merged to others*)  $\delta$  = 156.6 ( $J_{CF}$  = 250.00 Hz), 138.8, 138.7, 134.6, 131.9, 131.9, 131.7 ( $J_{CF}$  = 13.75 Hz), 130.5, 130.2, 130.1, 129.0 ( $J_{CF}$  = 3.75 Hz), 128.8, 128.7, 127.8, 127.5, 126.1, 126.0, 125.6, 124.9, 124.8 ( $J_{CF}$  = 3.75 Hz), 121.5 ( $J_{CF}$  = 18.75 Hz), 73.8 ( $J_{CF}$  = 3.75 Hz), 64.9, 28.4; **HRMS (ESI)**  $m/z$  calcd for C<sub>25</sub>H<sub>19</sub>ClFO<sup>+</sup> (M+H)<sup>+</sup> 389.1103, found 389.1104.

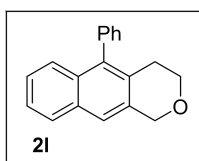

**(5-phenyl-3,4-dihydro-1H-benzo[g]isochromene, 2l**, yield 77%, 39.7 mg, white solid; **<sup>1</sup>H NMR (500 MHz, CDCl<sub>3</sub>)**:  $\delta$  = 7.80 (d,  $J$  = 8.5 Hz, 1H), 7.54 - 7.51 (m, 3H), 7.47 - 7.39 (m, 3H), 7.32 - 7.26 (m, 3H), 5.04 (s, 2H), 3.97 (t,  $J$  = 6.0 Hz, 2H), 2.70 (t,  $J$  = 6.0 Hz, 2H); **<sup>13</sup>C NMR (125 MHz, CDCl<sub>3</sub>)**:  $\delta$  = 138.9, 138.7, 133.2, 132.0, 131.9, 130.1, 129.7, 128.7, 127.5,

127.4, 126.2, 125.5, 125.5, 122.6, 68.9, 66.1, 28.2.

NMR spectroscopic signatures are matched with previously reported ones.<sup>3</sup>

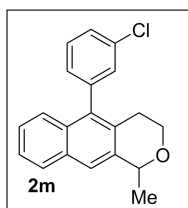

**5-(3-chlorophenyl)-1-methyl-3,4-dihydro-1H-benzo[gl]isochromene**

**e, 2m**, yield 66%, 40.7 mg, light yellow oil; **<sup>1</sup>H NMR (500 MHz, CDCl<sub>3</sub>)**:  $\delta$  = 7.82 (d,  $J$  = 8.0 Hz, 1H), 7.65 (s, 1H), 7.47 - 7.42 (m, 3H), 7.36 - 7.29 (m, 3H), 7.20 - 7.16 (m, 1H), 5.08 (q,  $J$  = 6.5 Hz,

1H), 4.16 - 4.12 (m, 1H), 3.83 - 3.77 (m, 1H), 2.91 - 2.82 (m, 1H), 2.55 - 2.48 (m, 1H), 1.73 (d,  $J$  = 6.5 Hz, 3H); **<sup>13</sup>C NMR (125 MHz, CDCl<sub>3</sub>)**: (*isomers*)  $\delta$  = 141.1, 138.1, 136.9, 134.6, 132.0, 131.3, 130.3, 130.1, 130.0, 128.5, 127.8, 127.6, 125.9, 125.7, 125.6, 123.6, 73.1, 64.2, 28.8, 22.4; **HRMS (ESI)**  $m/z$  calcd for C<sub>20</sub>H<sub>18</sub>ClO<sup>+</sup> (M+H)<sup>+</sup> 309.1041, found 309.1040.

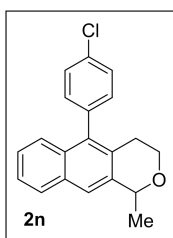

**5-(4-chlorophenyl)-1-methyl-3,4-dihydro-1H-benzo[gl]isochromene,**

**2n**, yield 60%, 40 mg, light yellow oil; **<sup>1</sup>H NMR (500 MHz, CDCl<sub>3</sub>)**:

$\delta$  = 7.82 (d,  $J$  = 8.5 Hz, 1H), 7.66 (s, 1H), 7.47 - 7.42 (m, 3H), 7.35 - 7.29 (m, 3H), 7.20 - 7.16 (m, 1H), 5.08 (q,  $J$  = 6.5 Hz, 1H), 4.16 - 4.12

(m, 1H), 3.83 - 3.77 (m, 1H), 2.91 - 2.82 (m, 1H), 2.54 - 2.48 (m, 1H), 1.73 (d,  $J$  = 6.5 Hz, 3H); **<sup>13</sup>C NMR (125 MHz, CDCl<sub>3</sub>)**:  $\delta$  = 141.1, 138.1, 136.8, 134.7, 132.0, 131.3, 130.3, 130.1, 130.0, 128.5, 127.8, 127.6, 125.9, 125.7, 125.6, 123.6, 73.1, 64.2, 28.8, 22.4; **HRMS (ESI)**  $m/z$  calcd for C<sub>20</sub>H<sub>18</sub>ClO<sup>+</sup> (M+H)<sup>+</sup> 309.1041, found 309.1040.

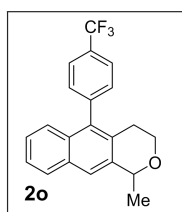

**1-methyl-5-(4-(trifluoromethyl)phenyl)-3,4-dihydro-1H-benzo[gl]i**

**sochromene, 2o**, yield 57%, 39.0 mg, light yellow oil; **<sup>1</sup>H NMR (500**

**MHz, CDCl<sub>3</sub>)**:  $\delta$  = 7.84 (d,  $J$  = 8.0 Hz, 1H), 7.80 (d,  $J$  = 8.5 Hz, 2H), 7.68 (s, 1H), 7.46 - 7.41 (m, 3H), 7.35 - 7.27 (m, 2H), 5.09 (q,  $J$  = 6.5

Hz, 1H), 4.16 - 4.12 (m, 1H), 3.80 (td,  $J$  = 11.0, 4.0 Hz, 1H), 2.88 - 2.81 (m, 1H), 2.47 (dt,  $J$  = 16.5, 3.5 Hz, 1H), 1.74 (d,  $J$  = 6.5 Hz, 3H); **<sup>13</sup>C NMR (125 MHz, CDCl<sub>3</sub>)**:  $\delta$  = 143.2, 138.1, 136.9, 132.1, 131.2, 130.7, 130.7, 130.0, 129.76 (q,  $J_{CF}$  = 32.5 Hz), 127.9, 126.0, 125.8 (q,  $J_{CF}$  = 3.75 Hz), 125.7, 125.7 (q,  $J_{CF}$  = 3.75 Hz), 125.6, 124.4 (q,  $J_{CF}$  = 270.0 Hz), 123.8, 73.1, 64.1, 28.9, 22.4; **<sup>19</sup>F NMR (470 MHz, CDCl<sub>3</sub>)**  $\delta$  =

-62.4; **HRMS (ESI)**  $m/z$  calcd for  $C_{21}H_{18}F_3O^+$  ( $M+H$ )<sup>+</sup> 343.1304, found 343.1303.

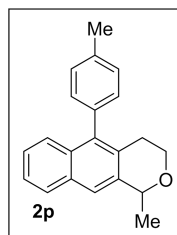

**1-methyl-5-(p-tolyl)-3,4-dihydro-1H-benzo[g]isochromene, 2p,**

yield 64%, 36.9 mg, light yellow oil; **<sup>1</sup>H NMR (500 MHz, CDCl<sub>3</sub>):**  $\delta$  = 7.82 (d,  $J$  = 8.0 Hz, 1H), 7.63 (s, 1H), 7.44 - 7.41 (m, 2H), 7.34 - 7.29 (m, 3H), 7.19 - 7.15 (m, 2H), 5.09 (q,  $J$  = 6.5 Hz, 1H), 4.15 - 4.11 (m, 1H), 3.79 (td,  $J$  = 11.0, 4.0 Hz, 1H), 2.92 - 2.85 (m, 1H), 2.54

(dt,  $J$  = 17.0, 3.5 Hz, 1H), 2.48 (s, 3H), 1.73 (d,  $J$  = 6.5 Hz, 3H); **<sup>13</sup>C NMR (125 MHz, CDCl<sub>3</sub>):** (*one carbon merged to others*)  $\delta$  = 138.4, 138.1, 136.9, 136.0, 132.0, 131.7, 130.1, 130.1, 129.5, 129.3, 127.7, 126.2, 125.6, 125.4, 123.0, 73.1, 64.3, 28.9, 22.4, 21.5; **HRMS (ESI)**  $m/z$  calcd for  $C_{21}H_{21}O^+$  ( $M+H$ )<sup>+</sup> 289.1587, found 289.1583.

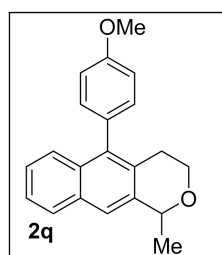

**5-(4-methoxyphenyl)-1-methyl-3,4-dihydro-1H-benzo[g]isochromene, 2q,** yield 71%, 43.2 mg, light yellow oil; **<sup>1</sup>H NMR (500 MHz, CDCl<sub>3</sub>):**  $\delta$  = 7.82 (d,  $J$  = 8.0 Hz, 1H), 7.63 (s, 1H), 7.44 - 7.40 (m, 2H), 7.33 - 7.30 (m, 1H), 7.22 - 7.18 (m, 2H), 7.07 - 7.05

(m, 2H), 5.09 (q,  $J$  = 6.5 Hz, 1H), 4.15 - 4.11 (m, 1H), 3.91 (s, 3H), 3.79 (td,  $J$  = 11.0, 3.5 Hz, 1H), 2.92 - 2.85 (m, 1H), 2.55 (dt,  $J$  = 17.0, 3.5 Hz, 1H), 1.73 (d,  $J$  = 6.5 Hz, 3H); **<sup>13</sup>C NMR (125 MHz, CDCl<sub>3</sub>):**  $\delta$  = 158.9, 138.1, 138.1, 132.0, 131.9, 131.3, 131.2, 131.2, 130.4, 127.7, 126.1, 125.6, 125.4, 123.0, 114.1, 114.1, 73.1, 64.3, 55.4, 29.0, 22.4; **HRMS (ESI)**  $m/z$  calcd for  $C_{21}H_{21}O_2^+$  ( $M+H$ )<sup>+</sup> 305.1536, found 305.1535.

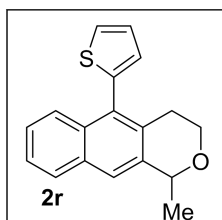

**1-methyl-5-(thiophen-2-yl)-3,4-dihydro-1H-benzo[g]isochromene, 2r,** yield 53%, 29.7 mg, light yellow oil; **<sup>1</sup>H NMR (500 MHz,**

**CDCl<sub>3</sub>):**  $\delta$  = 7.81 (d,  $J$  = 8.0 Hz, 1H), 7.66 (s, 1H), 7.58 (d,  $J$  = 8.5 Hz, 1H), 7.52 - 7.50 (m, 1H), 7.45 - 7.42 (m, 1H), 7.39 - 7.36 (m,

1H), 7.23 - 7.22 (m, 1H), 7.00 - 6.99 (m, 1H), 5.07 (q,  $J$  = 6.5 Hz, 1H), 4.18 - 4.14 (m, 1H), 3.82 (td,  $J$  = 11.0, 3.5 Hz, 1H), 3.02 - 2.95 (m, 1H), 2.69 (dt,  $J$  = 17.0, 3.5 Hz, 1H), 1.72 (d,  $J$  = 6.5 Hz, 3H); **<sup>13</sup>C NMR (125 MHz, CDCl<sub>3</sub>):**  $\delta$  = 139.2, 138.0, 132.8,

132.8, 131.9, 130.6, 128.1, 127.7, 127.4, 126.3, 126.1, 125.9, 125.6, 124.3, 73.0, 64.2, 28.8, 22.4; **HRMS (ESI)**  $m/z$  calcd for  $C_{18}H_{17}OS^+$  ( $M+H$ ) $^+$  281.0995, found 281.0996.

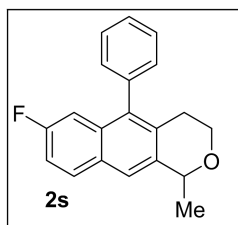

**7-fluoro-1-methyl-5-phenyl-3,4-dihydro-1H-benzo[g]isochromene, 2s**, yield 64%, 37.5 mg, light yellow oil;  **$^1H$  NMR (500 MHz,  $CDCl_3$ )**:  $\delta$  = 7.80 (dd,  $J$  = 9.0, 5.5 Hz, 1H), 7.63 (s, 1H), 7.54 - 7.51 (m, 2H), 7.48 - 7.44 (m, 1H), 7.27 - 7.22 (m, 2H), 7.20 (td,  $J$  = 8.5, 2.5 Hz, 1H), 6.98 (dd,  $J$  = 11.5, 2.5 Hz, 1H), 5.06 (q,  $J$  = 6.5 Hz, 1H), 4.14 - 4.10 (m, 1H), 3.79 (td,  $J$  = 10.5, 3.5 Hz, 1H), 2.89 - 2.83 (m, 1H), 2.52 (dt,  $J$  = 17.0, 3.5 Hz, 1H), 1.73 (d,  $J$  = 6.0 Hz, 3H);  **$^{13}C$  NMR (125 MHz,  $CDCl_3$ )**:  $\delta$  = 160.6 ( $J_{CF}$  = 243.75 Hz), 138.6, 138.0 ( $J_{CF}$  = 5.0 Hz), 137.4 ( $J_{CF}$  = 2.5 Hz), 132.5 ( $J_{CF}$  = 8.75 Hz), 131.2, 130.1, 130.1, 130.0, 129.1, 128.9, 128.8, 127.6, 123.0, 116.0 ( $J_{CF}$  = 26.25 Hz), 109.5 ( $J_{CF}$  = 22.5 Hz), 73.0, 64.2, 28.9, 22.3; **HRMS (ESI)**  $m/z$  calcd for  $C_{20}H_{18}FO^+$  ( $M+H$ ) $^+$  293.1336, found 293.1331.

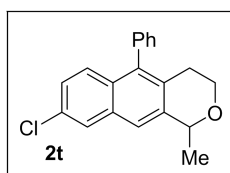

**7-chloro-1-methyl-5-phenyl-3,4-dihydro-1H-benzo[g]isochromene, 2t**, yield 53%, 32.6 mg, light yellow oil;  **$^1H$  NMR (500 MHz,  $CDCl_3$ )**:  $\delta$  = 7.74 (d,  $J$  = 8.5 Hz, 1H), 7.60 (s, 1H), 7.54 - 7.51 (m, 2H), 7.48 - 7.45 (m, 1H), 7.36 - 7.34 (m, 2H), 7.27 - 7.23 (m, 2H), 5.06 (q,  $J$  = 6.5 Hz, 1H), 4.14 - 4.10 (m, 1H), 3.78 (td,  $J$  = 11.0, 4.0 Hz, 1H), 2.88 - 2.81 (m, 1H), 2.50 (dt,  $J$  = 17.0, 3.5 Hz, 1H), 1.72 (d,  $J$  = 6.5 Hz, 3H);  **$^{13}C$  NMR (125 MHz,  $CDCl_3$ )**:  $\delta$  = 138.5, 138.3, 137.8, 132.3, 131.5, 131.3, 130.2, 130.1, 130.1, 129.4, 128.9, 128.8, 127.7, 126.4, 124.9, 123.0, 73.0, 64.1, 28.9, 22.3; **HRMS (ESI)**  $m/z$  calcd for  $C_{20}H_{18}ClO^+$  ( $M+H$ ) $^+$  309.1041, found 309.1041.

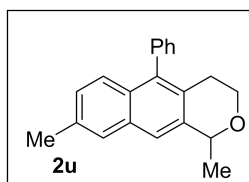

**1,8-dimethyl-5-phenyl-3,4-dihydro-1H-benzo[g]isochromene, 2u**, yield 68%, 39.2 mg, light yellow oil;  **$^1H$  NMR (500 MHz,  $CDCl_3$ )**:  $\delta$  = 7.60 (s, 1H), 7.56 (s, 1H), 7.52 (t,  $J$  = 7.5 Hz, 2H), 7.45 (t,  $J$  = 7.5 Hz, 1H), 7.30 - 7.26 (m, 3H), 7.15 (d,  $J$

= 8.5 Hz, 1H), 5.08 (q,  $J = 6.5$  Hz, 1H), 4.14 - 4.10 (m, 1H), 3.80 (td,  $J = 10.5, 3.5$  Hz, 1H), 2.89 - 2.82 (m, 1H), 2.53 - 2.49 (m, 4H), 1.73 (d,  $J = 6.5$  Hz, 3H);  $^{13}\text{C}$  NMR (125 MHz,  $\text{CDCl}_3$ ): (one carbon merged to others)  $\delta = 139.3, 138.2, 138.1, 135.0, 132.3, 130.2, 129.9, 129.0, 128.7, 128.6, 128.0, 127.3, 126.6, 125.9, 122.5, 73.2, 64.3, 28.8, 22.4, 21.6$ ; HRMS (ESI)  $m/z$  calcd for  $\text{C}_{21}\text{H}_{21}\text{O}^+$  ( $\text{M}+\text{H}$ ) $^+$  289.1587, found 289.1588.

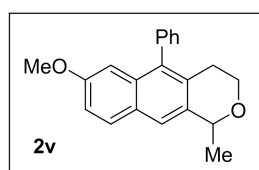

**7-methoxy-1-methyl-5-phenyl-3,4-dihydro-1H-benzo[gl]isochromene, 2v**, yield 95%, 57.8 mg, light yellow solid;  $^1\text{H}$  NMR (500 MHz,  $\text{CDCl}_3$ ):  $\delta = 7.73$  (d,  $J = 9.0$  Hz, 1H), 7.57 (s, 1H), 7.53 (t,  $J = 7.5$  Hz, 2H), 7.45 (t,  $J = 7.5$  Hz, 1H), 7.29 (t,  $J = 8.0$  Hz, 2H), 7.11 (dd,  $J = 9.0, 2.5$  Hz, 1H), 6.67 - 6.66 (m, 1H), 5.07 (q,  $J = 6.5$  Hz, 1H), 4.14 - 4.10 (m, 1H), 3.79 (td,  $J = 11.0, 4.0$  Hz, 1H), 3.67 (s, 3H), 2.89 - 2.82 (m, 1H), 2.49 (dt,  $J = 17.0, 3.0$  Hz, 1H), 1.72 (d,  $J = 6.5$  Hz, 3H);  $^{13}\text{C}$  NMR (125 MHz,  $\text{CDCl}_3$ ):  $\delta = 157.5, 139.3, 137.3, 135.7, 132.6, 130.5, 130.2, 130.1, 129.3, 128.9, 128.7, 127.7, 127.3, 122.9, 118.0, 104.5, 73.0, 64.3, 55.2, 29.0, 22.4$ ; HRMS (ESI)  $m/z$  calcd for  $\text{C}_{21}\text{H}_{21}\text{O}_2^+$  ( $\text{M}+\text{H}$ ) $^+$  305.1536, found 305.1535.

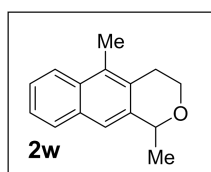

**1,5-dimethyl-3,4-dihydro-1H-benzo[gl]isochromene, 2w**, yield 76%, 32.3 mg, light yellow oil;  $^1\text{H}$  NMR (500 MHz,  $\text{CDCl}_3$ ):  $\delta = 8.03$  (d,  $J = 8.0$  Hz, 1H), 7.77 (d,  $J = 8.0$  Hz, 1H), 7.49 - 7.41 (m, 3H), 5.03 (q,  $J = 6.5$  Hz, 1H), 4.33 - 4.28 (m, 1H), 3.89 (td,  $J = 10.5, 4.0$  Hz, 1H), 3.15 - 3.08 (m, 1H), 2.89 (dt,  $J = 16.5, 3.5$  Hz, 1H), 2.58 (s, 3H), 1.67 (d,  $J = 6.5$  Hz, 3H);  $^{13}\text{C}$  NMR (125 MHz,  $\text{CDCl}_3$ ):  $\delta = 138.2, 132.0, 131.5, 131.4, 129.9, 128.4, 125.6, 125.2, 123.7, 121.7, 73.3, 64.3, 28.1, 22.4, 14.0$ ; HRMS (ESI)  $m/z$  calcd for  $\text{C}_{15}\text{H}_{17}\text{O}^+$  ( $\text{M}+\text{H}$ ) $^+$  213.1274, found 213.1275.



5. Preparation of compound **3**.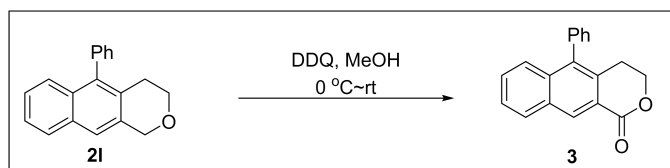Figure S5. Preparation of compound **3**

To a solution of **21** (50 mg, 0.19 mmol) in 2 mL MeOH was added DDQ (1.5 eq, 0.29 mmol) at 0 °C, then the mixture was stirred at rt for 16 h. Upon completion, the solvent was evaporated to dry and the residue was purified by chromatography to get the desired compound **3**.

**5-phenyl-3,4-dihydro-1H-benzo[ghi]isochromen-1-one, 3**, yield 95%, 50.4 mg, white solid;  $^1\text{H NMR}$  (500 MHz,  $\text{CDCl}_3$ ):  $\delta$  = 8.78 (s, 1H), 8.01 (d,  $J$  = 7.5 Hz, 1H), 7.55 - 7.47 (m, 6H), 7.29 - 7.28 (m, 2H), 4.48 (t,  $J$  = 6.0 Hz, 2H), 2.91 (t,  $J$  = 6.0 Hz, 2H);  $^{13}\text{C NMR}$  (125 MHz,  $\text{CDCl}_3$ ): (*three carbons merged to others*)  $\delta$  = 166.0, 137.6, 137.5, 135.1, 132.4, 132.3, 132.1, 130.2, 129.8, 129.1, 128.9, 128.0, 126.5, 123.1, 67.6, 27.1; **HRMS (ESI)**  $m/z$  calcd for  $\text{C}_{19}\text{H}_{15}\text{O}_2^+$  ( $\text{M}+\text{H}$ ) $^+$  275.1067, found 275.1069.

## 6. Mechanistic studies

In order seek into the mechanism of our reaction, the following experiments have been done.

The substrate **1w** with a methyl group instead of the aryl group on the  $\text{sp}^2$  carbon participated in this reaction smoothly and gave the desired product **2w** in high yield, indicating that the aryl ring on the  $\text{sp}^2$  carbon was not a requisite to stabilize the cation B. The aliphatic substituent could also stabilize the cation B (Figure S6 & S7).

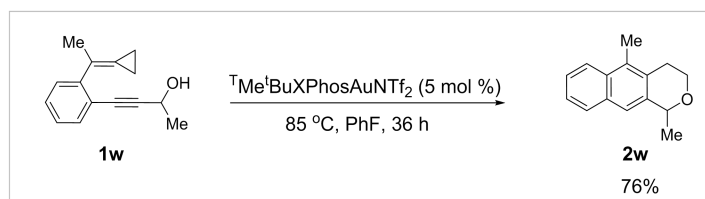Figure S6. Reaction of **1w**

The substrate **1aa** with a methyl group on the cyclopropane ring participated in the reaction led to unidentifiable messy products, indicating that the substituent on the cyclopropane could not stabilize the cation B.

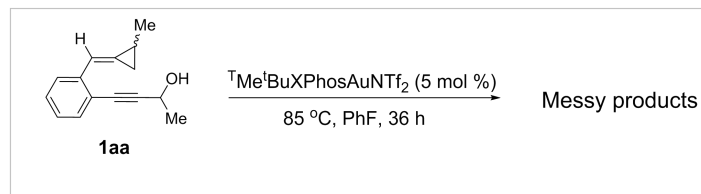

Figure S7. Reaction of **1aa**

The *6-endo-dig* cyclization product was the only product, this outcome led by the use of an electron-rich and sterically hindered ligand which would make the cationic intermediate less electropositive and then slowed the rate of deauration by proton. Furthermore, the naphthalene would be preferred due to its aromatic and thermodynamically stable characters. Thus, the *6-endo-dig* cyclization was favored. The *5-exo-dig* cyclization was disfavored because of the steric hindrance effect between R<sup>1</sup> and <sup>t</sup>Bu group of cation **B'** (Figure S8).

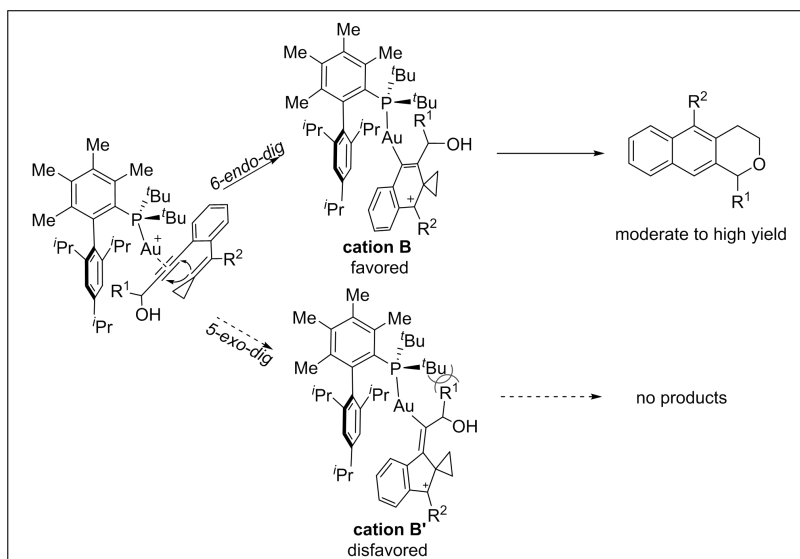

Figure S8. Analysis of reaction mechanisms

7. X-ray structure of **2v**.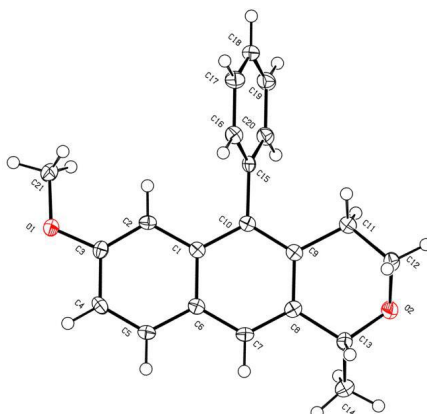Figure S9. X-ray structure of **2v****Table S2** Crystal data and structure refinement for **2v**.

|                                    |                                                               |
|------------------------------------|---------------------------------------------------------------|
| Identification code                | <b>2v</b>                                                     |
| Empirical formula                  | C <sub>21</sub> H <sub>20</sub> O <sub>2</sub>                |
| Formula weight                     | 304.37                                                        |
| Temperature/K                      | 100.00(10)                                                    |
| Crystal system                     | orthorhombic                                                  |
| Space group                        | Pbca                                                          |
| a/Å                                | 14.8226(12)                                                   |
| b/Å                                | 9.0342(7)                                                     |
| c/Å                                | 23.887(2)                                                     |
| α/°                                | 90                                                            |
| β/°                                | 90                                                            |
| γ/°                                | 90                                                            |
| Volume/Å <sup>3</sup>              | 3198.7(4)                                                     |
| Z                                  | 8                                                             |
| ρ <sub>calc</sub> /cm <sup>3</sup> | 1.264                                                         |
| μ/mm <sup>-1</sup>                 | 0.080                                                         |
| F(000)                             | 1296.0                                                        |
| Crystal size/mm <sup>3</sup>       | 0.14 × 0.12 × 0.11                                            |
| Radiation                          | Mo Kα (λ = 0.71073)                                           |
| 2θ range for data collection/°     | 4.38 to 49.998                                                |
| Index ranges                       | -17 ≤ h ≤ 17, -10 ≤ k ≤ 9, -19 ≤ l ≤ 28                       |
| Reflections collected              | 9295                                                          |
| Independent reflections            | 2822 [R <sub>int</sub> = 0.0433, R <sub>sigma</sub> = 0.0509] |
| Data/restraints/parameters         | 2822/0/210                                                    |
| Goodness-of-fit on F <sup>2</sup>  | 1.070                                                         |
| Final R indexes [I ≥ 2σ (I)]       | R <sub>1</sub> = 0.0457, wR <sub>2</sub> = 0.0904             |

## Electronic Supplementary Information

Final R indexes [all data]  $R_1 = 0.0683$ ,  $wR_2 = 0.1023$

Largest diff. peak/hole /  $e \text{ \AA}^{-3}$  0.21/-0.19

**Table S3** Fractional Atomic Coordinates ( $\times 10^4$ ) and Equivalent Isotropic Displacement Parameters ( $\text{\AA}^2 \times 10^3$ ) for **2v**.  $U_{\text{eq}}$  is defined as 1/3 of the trace of the orthogonalised  $U_{ij}$  tensor.

| Atom | x          | y          | z         | U(eq)   |
|------|------------|------------|-----------|---------|
| O1   | 3364.3(9)  | 4433.7(13) | 5139.0(5) | 22.6(3) |
| O2   | 3727.3(8)  | 8233.3(14) | 1770.6(5) | 23.8(3) |
| C9   | 4079.8(12) | 7603(2)    | 2902.6(8) | 16.4(4) |
| C1   | 3779.9(11) | 6147.5(19) | 3745.9(7) | 14.1(4) |
| C6   | 3321.9(11) | 5079(2)    | 3410.4(8) | 15.3(4) |
| C10  | 4172.8(11) | 7401.1(19) | 3476.5(7) | 14.8(4) |
| C3   | 3417.8(12) | 4708(2)    | 4574.5(8) | 17.4(4) |
| C8   | 3578.3(12) | 6572(2)    | 2575.9(8) | 17.2(4) |
| C15  | 4706.2(12) | 8485(2)    | 3816.8(7) | 16.7(4) |
| C5   | 2971.8(12) | 3792(2)    | 3672.6(8) | 17.2(4) |
| C4   | 3015.5(12) | 3599(2)    | 4236.1(8) | 19.3(4) |
| C2   | 3807.5(11) | 5930(2)    | 4337.1(8) | 15.9(4) |
| C7   | 3229.7(12) | 5333(2)    | 2831.1(8) | 16.5(4) |
| C16  | 5537.2(12) | 8063(2)    | 4036.6(8) | 21.0(5) |
| C20  | 4402.7(13) | 9922(2)    | 3922.1(8) | 20.8(5) |
| C13  | 3475.2(13) | 6777(2)    | 1945.3(8) | 20.2(4) |
| C18  | 5739.0(14) | 10447(2)   | 4457.4(8) | 24.7(5) |
| C11  | 4518.6(13) | 8905(2)    | 2610.2(8) | 21.5(5) |
| C17  | 6051.3(13) | 9036(2)    | 4354.9(8) | 24.8(5) |
| C19  | 4914.5(13) | 10894(2)   | 4238.9(8) | 24.0(5) |
| C12  | 4591.5(13) | 8641(2)    | 1986.4(8) | 24.6(5) |
| C21  | 3674.4(14) | 5582(2)    | 5504.0(8) | 25.1(5) |
| C14  | 2522.4(14) | 6557(2)    | 1734.8(8) | 28.1(5) |

**Table S4** Anisotropic Displacement Parameters ( $\text{\AA}^2 \times 10^3$ ) for **2v**. The Anisotropic displacement factor exponent takes the form:  $-2\pi^2[h^2a^*2U_{11}+2hka^*b^*U_{12}+\dots]$ .

| Atom | $U_{11}$ | $U_{22}$ | $U_{33}$ | $U_{23}$ | $U_{13}$ | $U_{12}$ |
|------|----------|----------|----------|----------|----------|----------|
| O1   | 32.1(8)  | 19.9(7)  | 15.6(7)  | 0.9(6)   | -0.1(6)  | -5.3(6)  |
| O2   | 24.4(7)  | 25.4(8)  | 21.7(8)  | 5.9(6)   | -4.8(6)  | -6.0(6)  |
| C9   | 14.5(9)  | 15.7(10) | 19.0(10) | -0.7(8)  | 1.3(8)   | 1.3(8)   |
| C1   | 10.1(9)  | 14.8(10) | 17.3(10) | -0.6(8)  | 1.7(7)   | 2.9(8)   |
| C6   | 10.9(9)  | 16.5(10) | 18.6(11) | -0.9(8)  | 1.0(8)   | 1.7(8)   |
| C10  | 13.0(9)  | 13.9(10) | 17.6(10) | -1.8(8)  | 1.5(8)   | 2.1(8)   |

## Electronic Supplementary Information

|     |          |          |          |         |         |           |
|-----|----------|----------|----------|---------|---------|-----------|
| C3  | 16.9(10) | 19.5(11) | 15.9(11) | 1.6(8)  | 1.1(8)  | 2.3(9)    |
| C8  | 15.4(10) | 18.6(10) | 17.5(11) | -1.8(8) | 0.6(8)  | 2.7(8)    |
| C15 | 17.9(10) | 19.5(10) | 12.8(10) | 0.8(8)  | 4.0(8)  | -3.9(8)   |
| C5  | 16.9(10) | 14.9(10) | 19.9(11) | -2.8(8) | -1.7(8) | -1.2(8)   |
| C4  | 18.4(10) | 15.5(10) | 23.9(11) | 3.8(9)  | 0.5(8)  | -3.2(8)   |
| C2  | 13.2(9)  | 16.4(10) | 18.1(11) | -3.5(8) | -0.5(8) | -0.5(8)   |
| C7  | 15.0(9)  | 16.1(10) | 18.3(11) | -4.3(8) | -1.1(8) | -0.2(8)   |
| C16 | 21.6(10) | 19.5(11) | 21.9(11) | 0.4(9)  | 0.2(9)  | -0.5(9)   |
| C20 | 20.6(10) | 20.5(11) | 21.3(11) | 0.9(8)  | 1.3(8)  | -1.4(9)   |
| C13 | 24.6(10) | 18.8(11) | 17.3(11) | 1.9(8)  | 0.3(8)  | -1.1(9)   |
| C18 | 31.9(12) | 24.3(11) | 17.9(11) | -1.5(9) | -1.1(9) | -11.4(10) |
| C11 | 21.6(10) | 22.3(11) | 20.6(11) | 0.8(9)  | -0.5(8) | -4.7(9)   |
| C17 | 19.7(10) | 28.9(12) | 25.9(12) | 1.6(9)  | -5.2(9) | -5.0(9)   |
| C19 | 32.0(12) | 17.5(11) | 22.6(12) | -3.3(9) | 4.1(9)  | -3.1(9)   |
| C12 | 24.7(11) | 28.8(11) | 20.1(11) | 5.4(9)  | -0.3(9) | -8.1(10)  |
| C21 | 35.1(12) | 23.7(11) | 16.4(11) | -1.1(9) | 0.5(9)  | -3.7(10)  |
| C14 | 31.0(12) | 31.3(12) | 22.1(11) | 2.4(10) | -7.7(9) | -7.3(10)  |

**Table S5** Bond Lengths for **2v**.

| Atom | Atom | Length/Å | Atom | Atom | Length/Å |
|------|------|----------|------|------|----------|
| O1   | C3   | 1.373(2) | C3   | C4   | 1.419(3) |
| O1   | C21  | 1.431(2) | C3   | C2   | 1.369(3) |
| O2   | C13  | 1.430(2) | C8   | C7   | 1.375(3) |
| O2   | C12  | 1.429(2) | C8   | C13  | 1.525(3) |
| C9   | C10  | 1.390(3) | C15  | C16  | 1.392(3) |
| C9   | C8   | 1.424(3) | C15  | C20  | 1.397(3) |
| C9   | C11  | 1.515(3) | C5   | C4   | 1.359(3) |
| C1   | C6   | 1.426(2) | C16  | C17  | 1.390(3) |
| C1   | C10  | 1.427(2) | C20  | C19  | 1.385(3) |
| C1   | C2   | 1.426(3) | C13  | C14  | 1.512(3) |
| C6   | C5   | 1.419(2) | C18  | C17  | 1.379(3) |
| C6   | C7   | 1.409(3) | C18  | C19  | 1.389(3) |
| C10  | C15  | 1.498(2) | C11  | C12  | 1.513(3) |

**Table S6** Bond Angles for **2v**.

| Atom | Atom | Atom | Angle/°    | Atom | Atom | Atom | Angle/°    |
|------|------|------|------------|------|------|------|------------|
| C3   | O1   | C21  | 116.67(14) | C7   | C8   | C13  | 119.94(16) |

## Electronic Supplementary Information

|     |     |     |            |     |     |     |            |
|-----|-----|-----|------------|-----|-----|-----|------------|
| C12 | O2  | C13 | 111.49(14) | C16 | C15 | C10 | 119.50(16) |
| C10 | C9  | C8  | 120.44(17) | C16 | C15 | C20 | 118.14(17) |
| C10 | C9  | C11 | 120.92(16) | C20 | C15 | C10 | 122.36(16) |
| C8  | C9  | C11 | 118.64(16) | C4  | C5  | C6  | 121.68(17) |
| C6  | C1  | C10 | 118.55(16) | C5  | C4  | C3  | 119.58(18) |
| C6  | C1  | C2  | 118.46(16) | C3  | C2  | C1  | 120.63(17) |
| C2  | C1  | C10 | 122.98(16) | C8  | C7  | C6  | 122.06(17) |
| C5  | C6  | C1  | 118.71(16) | C17 | C16 | C15 | 121.23(18) |
| C7  | C6  | C1  | 119.22(17) | C19 | C20 | C15 | 120.74(18) |
| C7  | C6  | C5  | 122.07(17) | O2  | C13 | C8  | 111.97(15) |
| C9  | C10 | C1  | 120.55(16) | O2  | C13 | C14 | 105.56(15) |
| C9  | C10 | C15 | 120.12(16) | C14 | C13 | C8  | 113.94(16) |
| C1  | C10 | C15 | 119.31(16) | C17 | C18 | C19 | 119.83(18) |
| O1  | C3  | C4  | 114.06(16) | C12 | C11 | C9  | 111.26(16) |
| C2  | C3  | O1  | 125.22(17) | C18 | C17 | C16 | 119.87(19) |
| C2  | C3  | C4  | 120.72(17) | C20 | C19 | C18 | 120.19(18) |
| C9  | C8  | C13 | 120.91(16) | O2  | C12 | C11 | 109.38(15) |
| C7  | C8  | C9  | 119.05(17) |     |     |     |            |

**Table S7 Torsion Angles for 2v.**

| A   | B   | C   | D   | Angle/°     | A   | B   | C   | D   | Angle/°     |
|-----|-----|-----|-----|-------------|-----|-----|-----|-----|-------------|
| O1  | C3  | C4  | C5  | 175.64(16)  | C15 | C16 | C17 | C18 | 0.0(3)      |
| O1  | C3  | C2  | C1  | -176.33(16) | C15 | C20 | C19 | C18 | -0.1(3)     |
| C9  | C10 | C15 | C16 | -109.3(2)   | C5  | C6  | C7  | C8  | -179.22(17) |
| C9  | C10 | C15 | C20 | 70.4(2)     | C4  | C3  | C2  | C1  | 3.0(3)      |
| C9  | C8  | C7  | C6  | 2.6(3)      | C2  | C1  | C6  | C5  | -4.6(2)     |
| C9  | C8  | C13 | O2  | -14.5(2)    | C2  | C1  | C6  | C7  | 175.31(16)  |
| C9  | C8  | C13 | C14 | -134.25(18) | C2  | C1  | C10 | C9  | -176.16(16) |
| C9  | C11 | C12 | O2  | 52.2(2)     | C2  | C1  | C10 | C15 | 5.2(2)      |
| C1  | C6  | C5  | C4  | 4.0(3)      | C2  | C3  | C4  | C5  | -3.7(3)     |
| C1  | C6  | C7  | C8  | 0.9(3)      | C7  | C6  | C5  | C4  | -175.96(17) |
| C1  | C10 | C15 | C16 | 69.4(2)     | C7  | C8  | C13 | O2  | 169.31(16)  |
| C1  | C10 | C15 | C20 | -110.9(2)   | C7  | C8  | C13 | C14 | 49.6(2)     |
| C6  | C1  | C10 | C9  | 2.4(2)      | C16 | C15 | C20 | C19 | -0.3(3)     |
| C6  | C1  | C10 | C15 | -176.19(15) | C20 | C15 | C16 | C17 | 0.4(3)      |
| C6  | C1  | C2  | C3  | 1.2(2)      | C13 | O2  | C12 | C11 | -71.2(2)    |
| C6  | C5  | C4  | C3  | 0.2(3)      | C13 | C8  | C7  | C6  | 178.83(16)  |
| C10 | C9  | C8  | C7  | -3.5(3)     | C11 | C9  | C10 | C1  | -178.11(16) |
| C10 | C9  | C8  | C13 | -179.72(16) | C11 | C9  | C10 | C15 | 0.5(3)      |

## Electronic Supplementary Information

|     |     |     |     |             |     |     |     |     |             |
|-----|-----|-----|-----|-------------|-----|-----|-----|-----|-------------|
| C10 | C9  | C11 | C12 | 161.37(16)  | C11 | C9  | C8  | C7  | 175.59(16)  |
| C10 | C1  | C6  | C5  | 176.71(15)  | C11 | C9  | C8  | C13 | -0.6(3)     |
| C10 | C1  | C6  | C7  | -3.4(2)     | C17 | C18 | C19 | C20 | 0.5(3)      |
| C10 | C1  | C2  | C3  | 179.84(16)  | C19 | C18 | C17 | C16 | -0.4(3)     |
| C10 | C15 | C16 | C17 | -179.91(17) | C12 | O2  | C13 | C8  | 50.3(2)     |
| C10 | C15 | C20 | C19 | 179.97(17)  | C12 | O2  | C13 | C14 | 174.77(15)  |
| C8  | C9  | C10 | C1  | 1.0(3)      | C21 | O1  | C3  | C4  | -173.76(16) |
| C8  | C9  | C10 | C15 | 179.62(16)  | C21 | O1  | C3  | C2  | 5.6(3)      |
| C8  | C9  | C11 | C12 | -17.8(2)    |     |     |     |     |             |

**Table S8** Hydrogen Atom Coordinates ( $\text{\AA} \times 10^4$ ) and Isotropic Displacement Parameters ( $\text{\AA}^2 \times 10^3$ ) for **2v**.

| Atom | x       | y        | z       | U(eq) |
|------|---------|----------|---------|-------|
| H5   | 2705.64 | 3062.6   | 3453.2  | 21    |
| H4   | 2783.14 | 2745.16  | 4398.93 | 23    |
| H2   | 4092.95 | 6624.06  | 4563.33 | 19    |
| H7   | 2923.6  | 4640.09  | 2614.5  | 20    |
| H16  | 5752.18 | 7112.57  | 3969.17 | 25    |
| H20  | 3850.91 | 10229.98 | 3777.89 | 25    |
| H13  | 3868.53 | 6063.29  | 1756.12 | 24    |
| H18  | 6079.6  | 11098.91 | 4672.41 | 30    |
| H11A | 4164.84 | 9790.35  | 2677.57 | 26    |
| H11B | 5116.32 | 9063.35  | 2764.27 | 26    |
| H17  | 6605.01 | 8734.94  | 4498.41 | 30    |
| H19  | 4705.33 | 11848.7  | 4305.48 | 29    |
| H12A | 4801.57 | 9534.19  | 1802.3  | 29    |
| H12B | 5023.48 | 7858.32  | 1913.51 | 29    |
| H21A | 3377.38 | 6493.74  | 5410.74 | 38    |
| H21B | 4314.39 | 5700.22  | 5461.39 | 38    |
| H21C | 3539.46 | 5323.08  | 5884.63 | 38    |
| H14A | 2125.38 | 7234.19  | 1922.45 | 42    |
| H14B | 2334.17 | 5559.5   | 1809.5  | 42    |
| H14C | 2502.89 | 6737     | 1338.95 | 42    |

### Experimental

A suitable crystal was selected and determined on a SuperNova, Dual, Cu at zero, AtlasS2 diffractometer. The crystal was kept at 100.00(10) K during data collection.

### Crystal structure determination of **2v**

## Electronic Supplementary Information

---

Crystal Data for C<sub>21</sub>H<sub>20</sub>O<sub>2</sub> ( $M = 304.37$  g/mol): orthorhombic, space group Pbc<sub>a</sub> (no. 61),  $a = 14.8226(12)$  Å,  $b = 9.0342(7)$  Å,  $c = 23.887(2)$  Å,  $V = 3198.7(4)$  Å<sup>3</sup>,  $Z = 8$ ,  $T = 100.00(10)$  K,  $\mu(\text{Mo K}\alpha) = 0.080$  mm<sup>-1</sup>,  $D_{\text{calc}} = 1.264$  g/cm<sup>3</sup>, 9295 reflections measured ( $4.38 \leq 2\theta \leq 49.998$ ), 2822 unique ( $R_{\text{int}} = 0.0433$ ,  $R_{\text{sigma}} = 0.0509$ ) which were used in all calculations. The final  $R_1$  was 0.0457 ( $I > 2\sigma(I)$ ) and  $wR_2$  was 0.1023 (all data).

### 8. Reference:

1. P.-H. Li, L.-Z. Yu, X.-Y. Zhang, M. Shi, *Org. Lett.*, 2018, **20**, 4516.
2. A. Smeyanov, A. Schmidt, *Synthetic Communications*, 2013, **43**, 2809.
3. V. Gudla and R. Balamurugan, *J. Org. Chem.*, 2011, **76**, 9919.



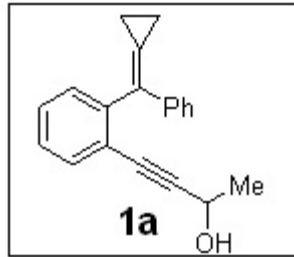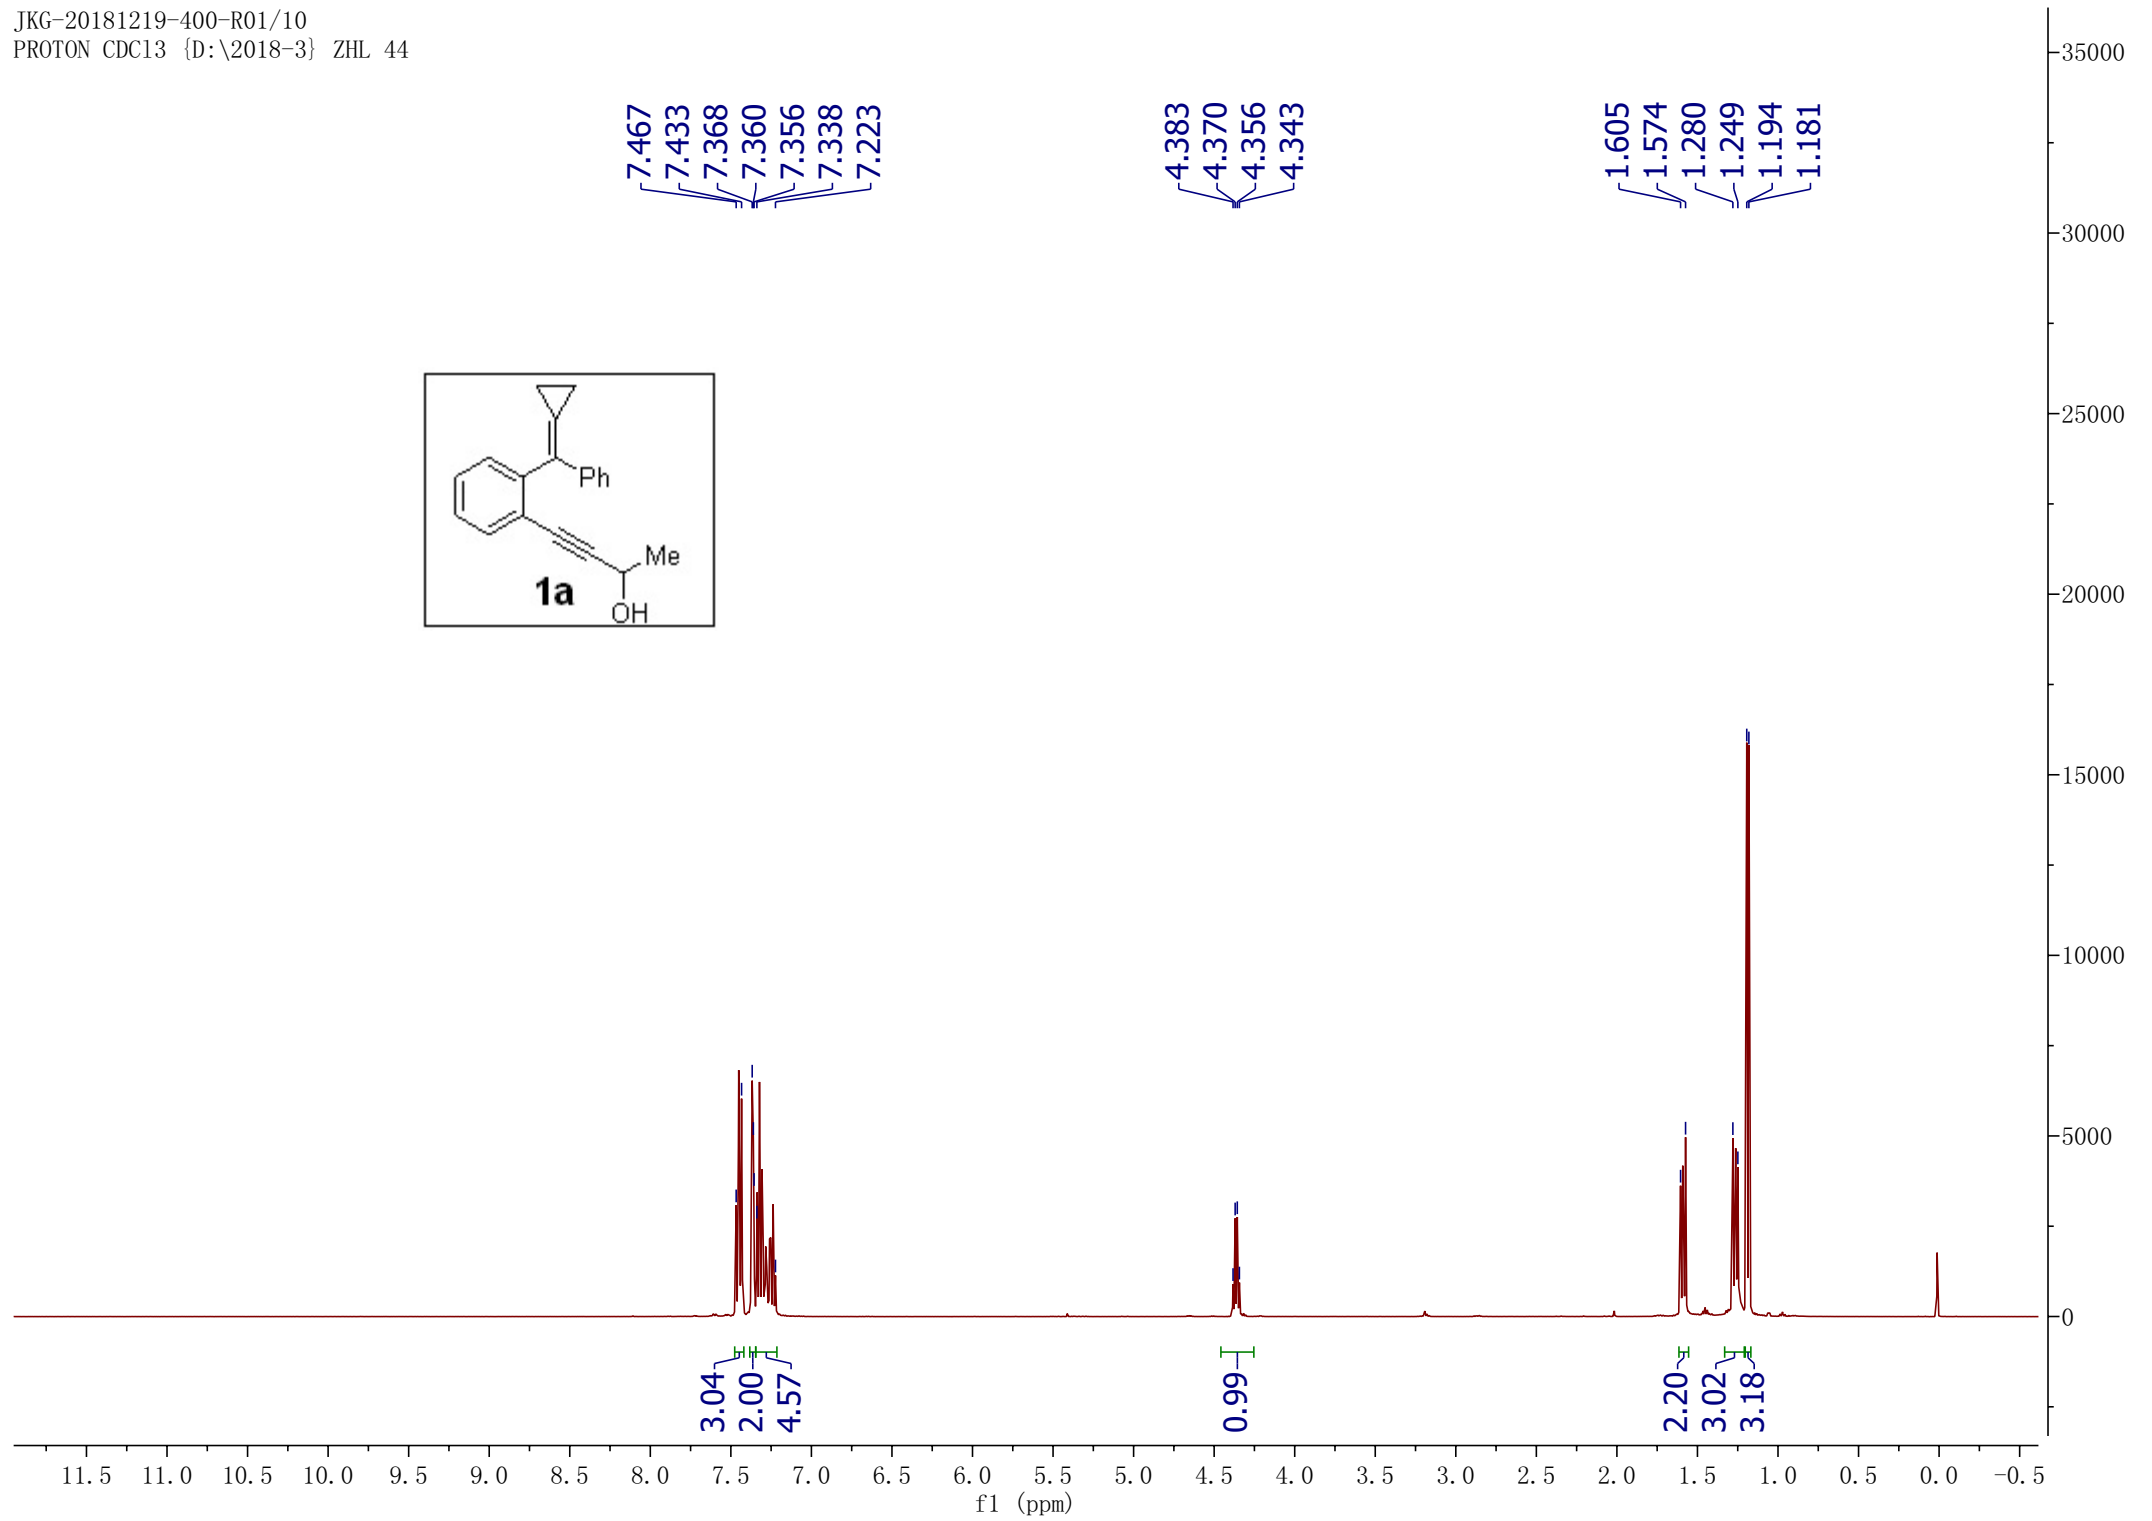

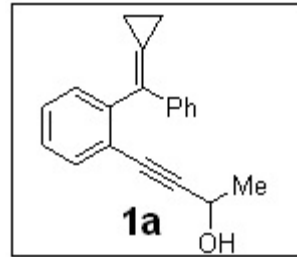

143.99  
140.99  
132.52  
130.43  
129.42  
128.46  
128.19  
127.29  
127.08  
126.68  
126.37  
122.34

—95.08

83.92

77.41 CDC13

77.16 CDC13

76.90 CDC13

—58.71

—23.97

~5.28

~2.43

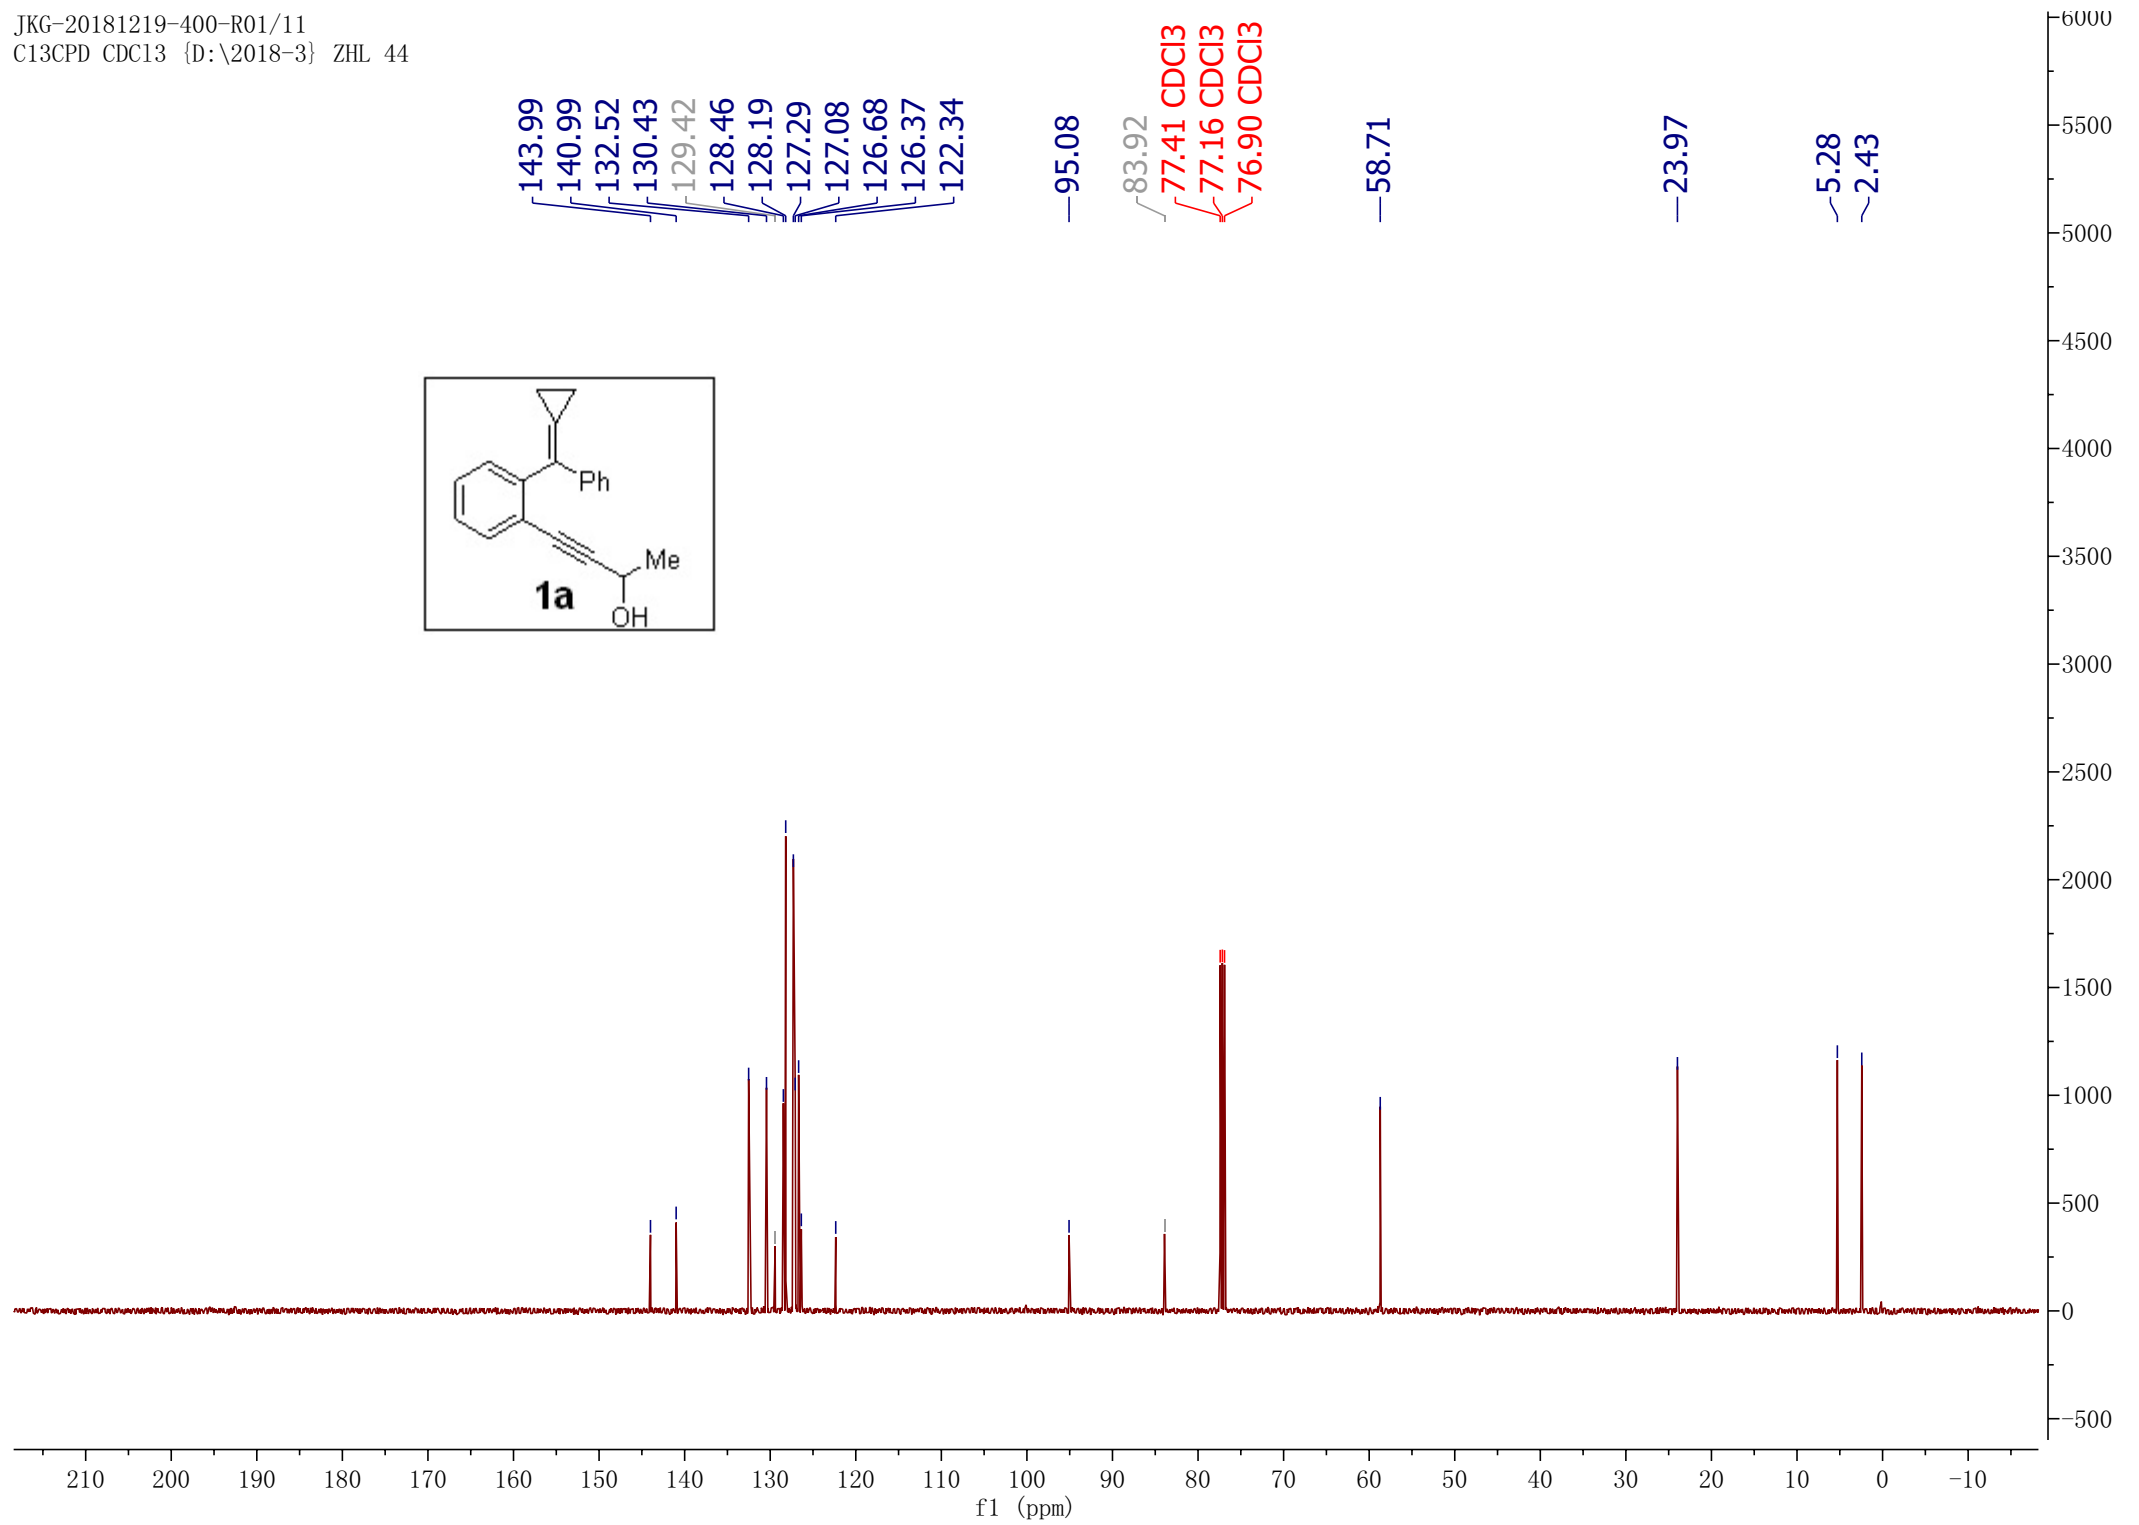

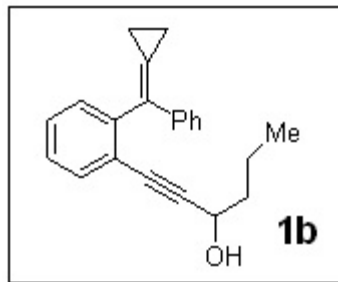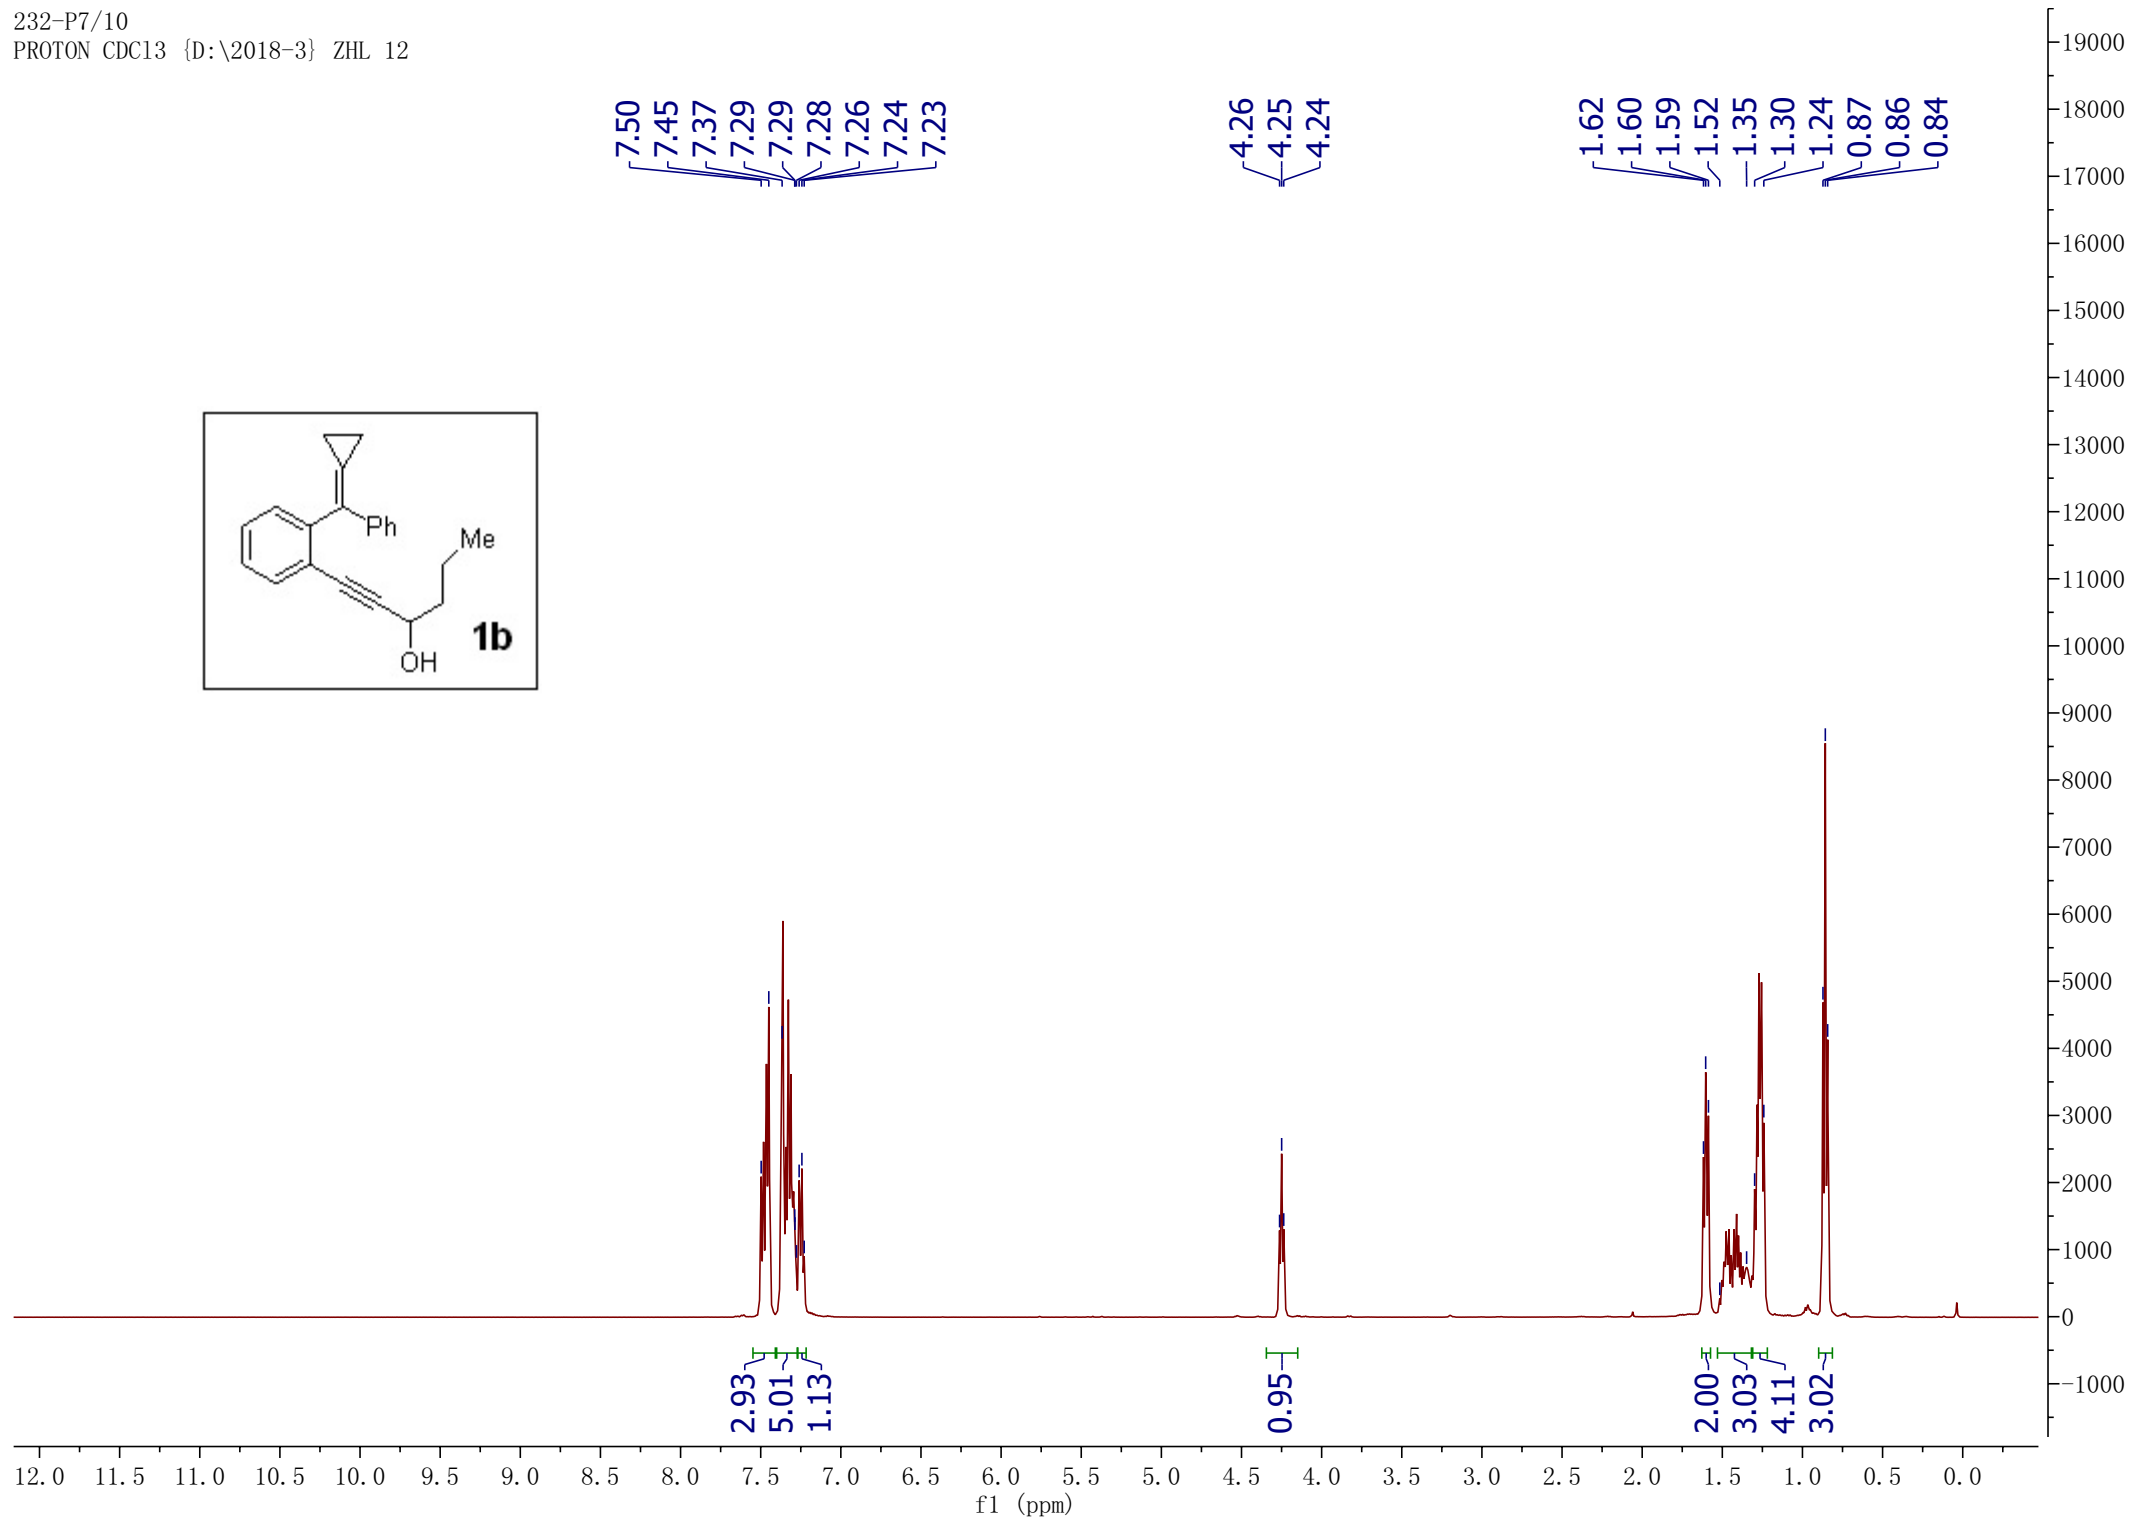

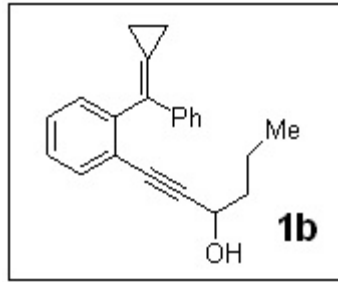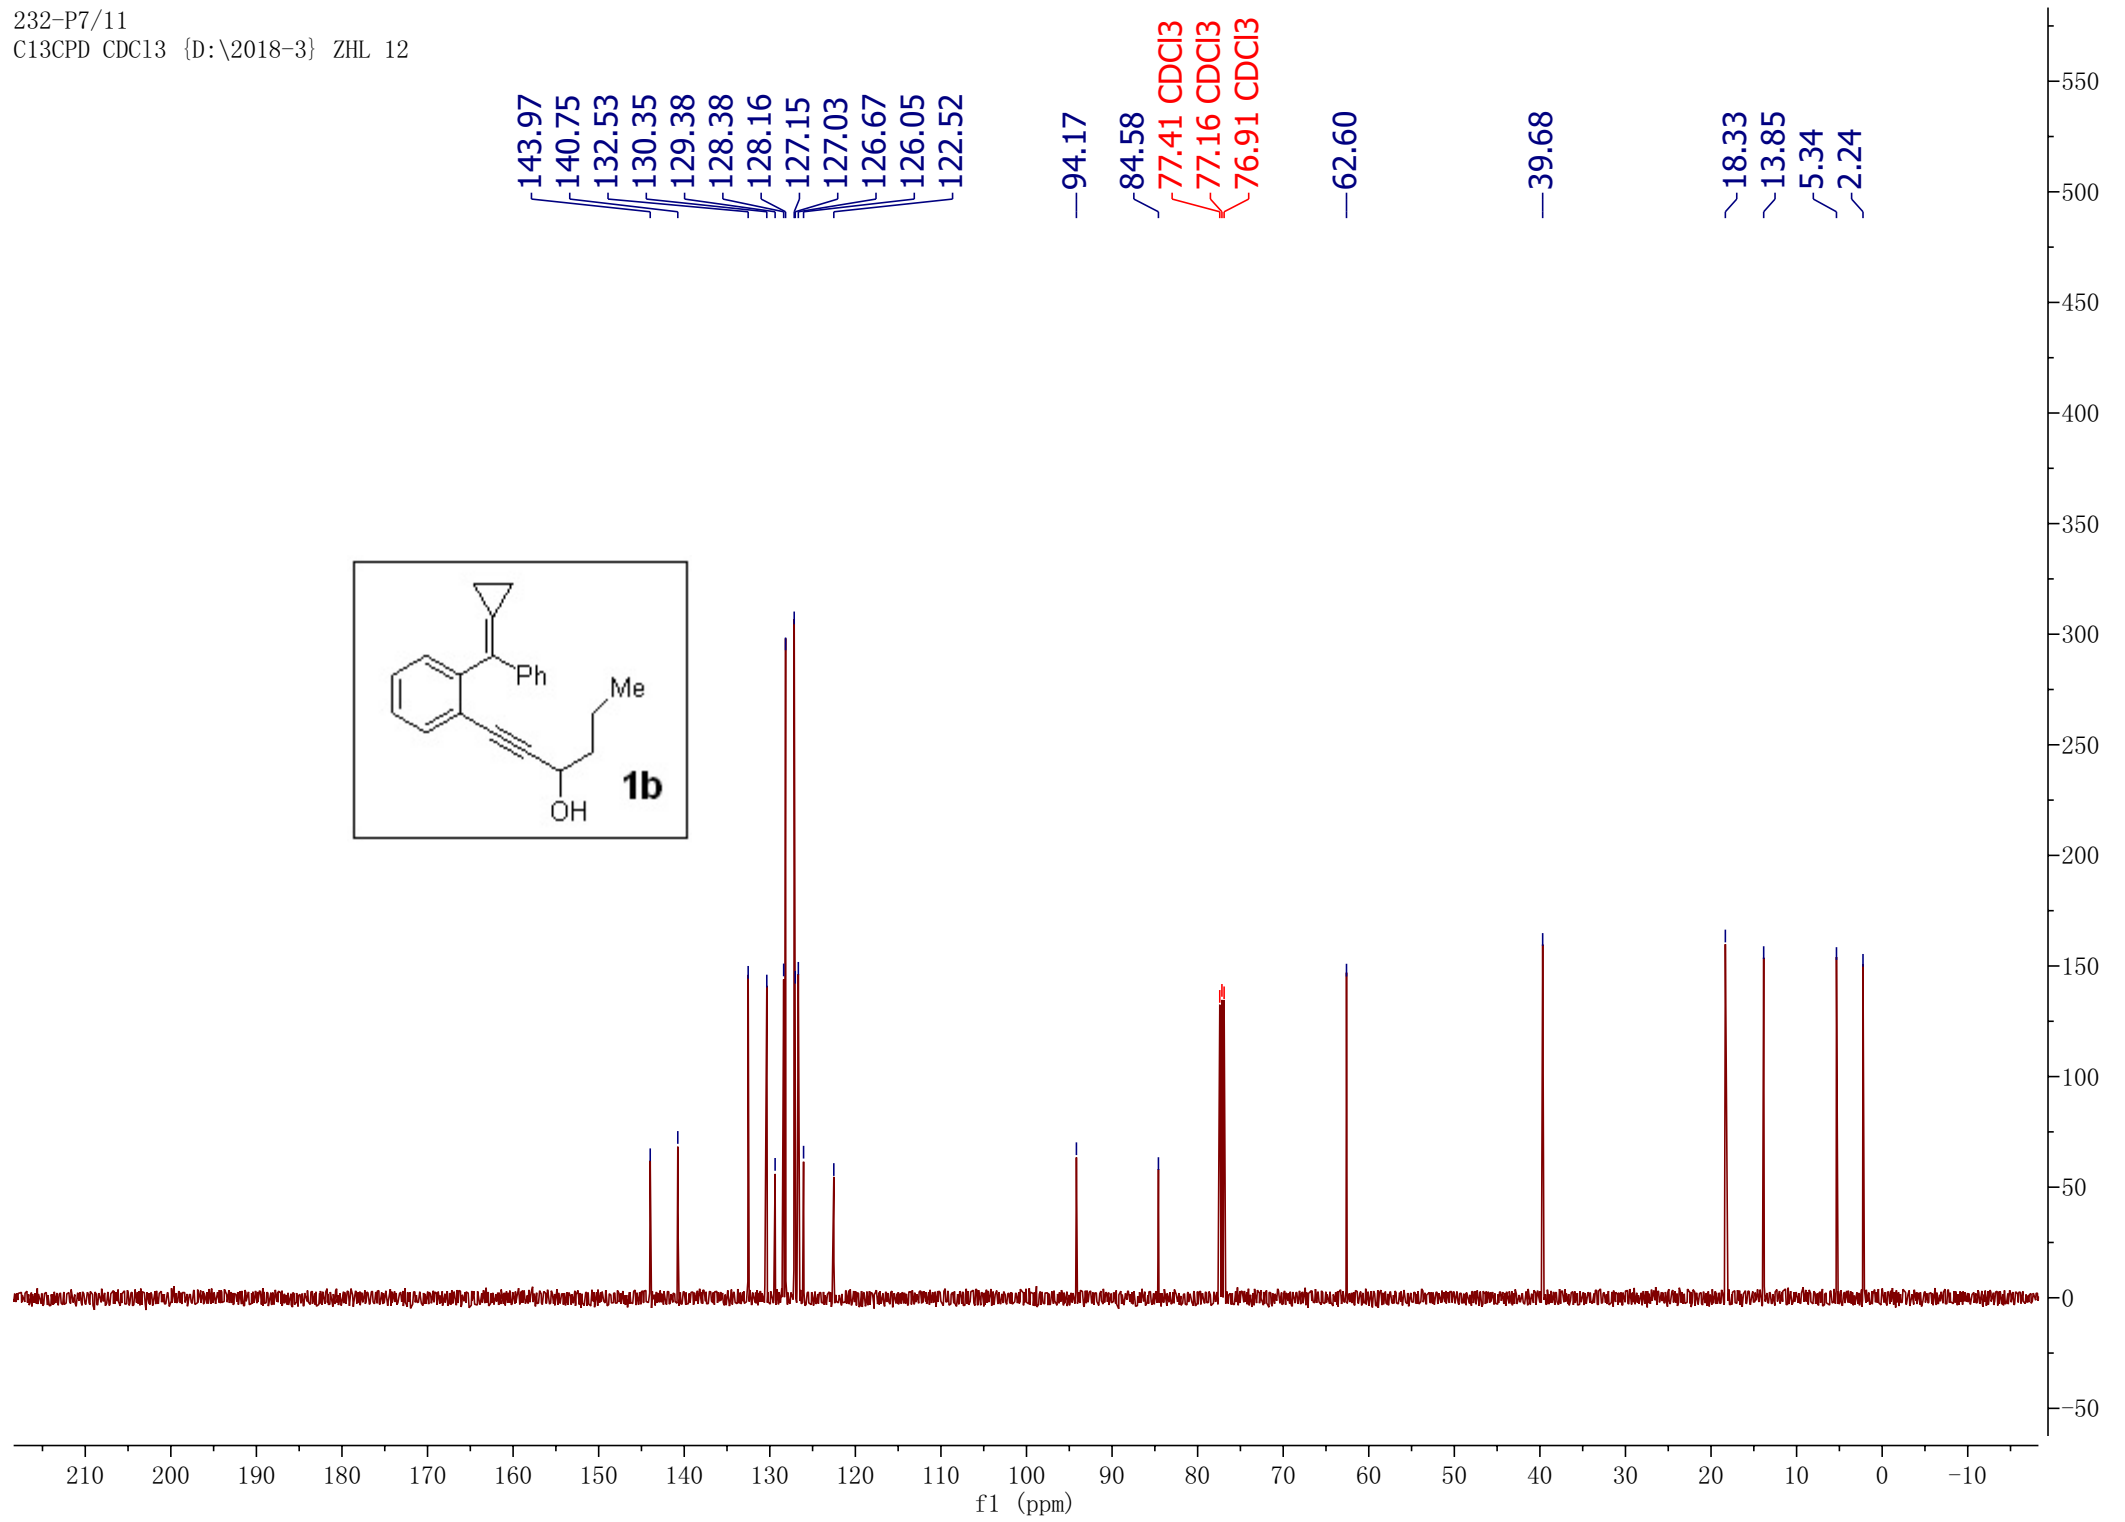

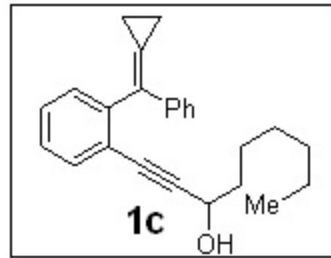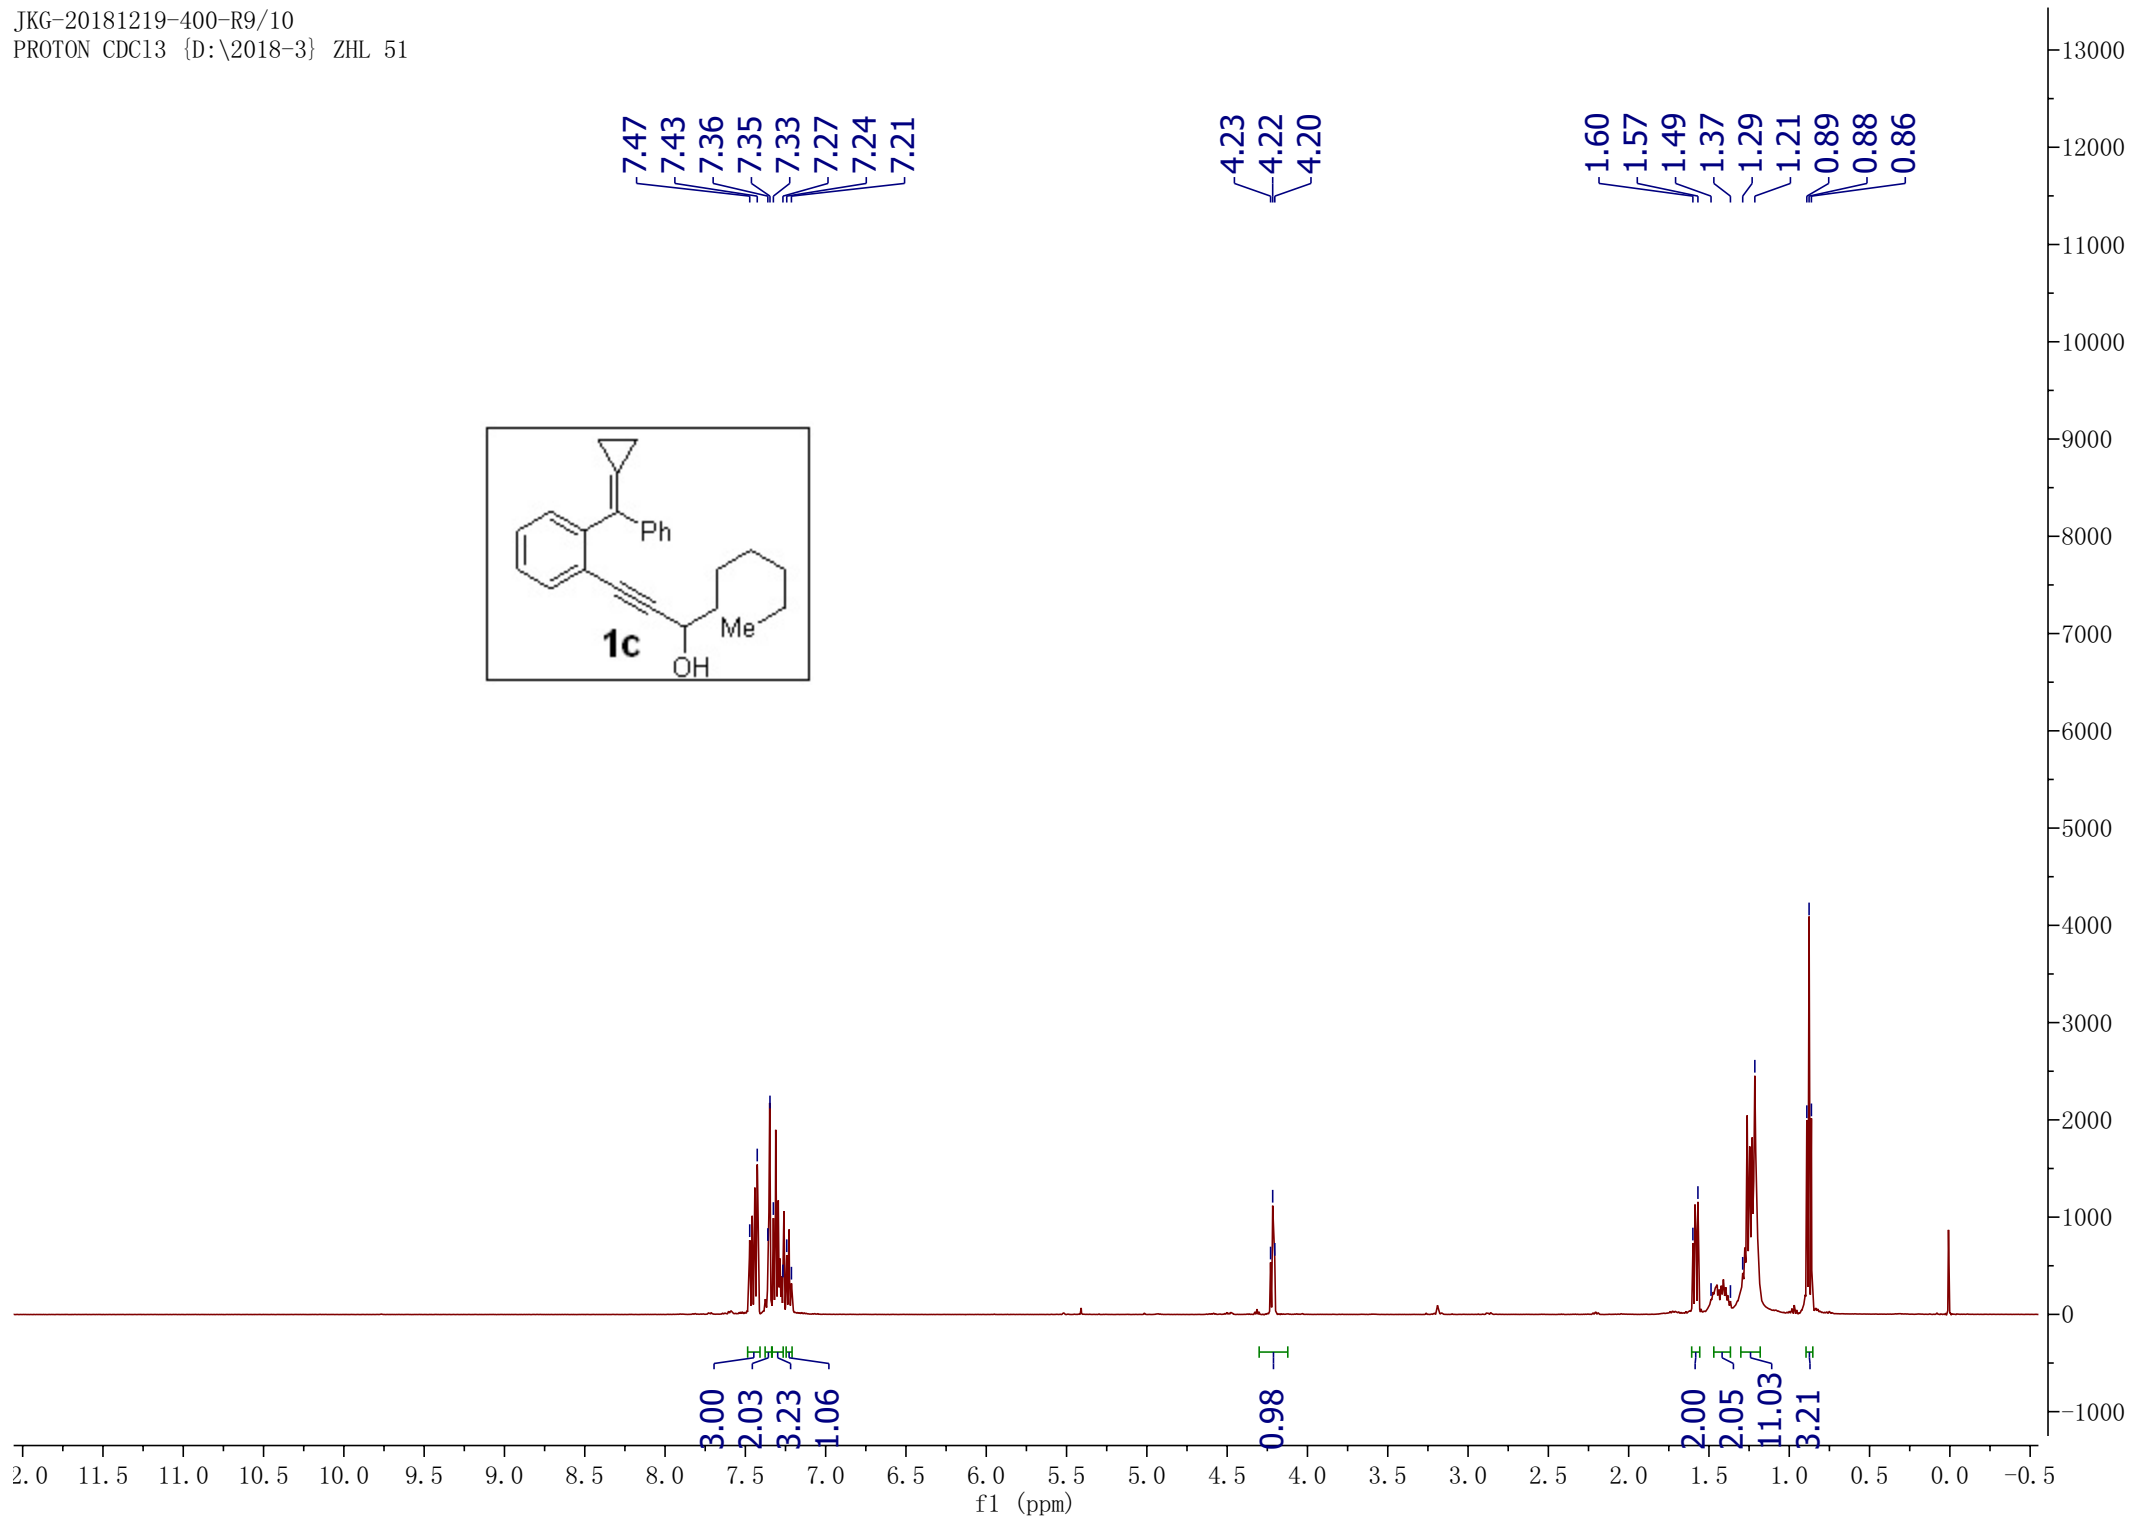

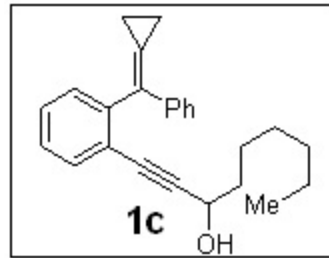

144.01  
140.85  
132.54  
130.40  
129.42  
128.42  
128.19  
127.22  
127.07  
126.71  
126.16  
122.51

94.24

84.66

77.41 CDC13

77.16 CDC13

76.91 CDC13

62.89

37.64

31.85

29.09

25.08

22.73

14.21

5.35

2.32

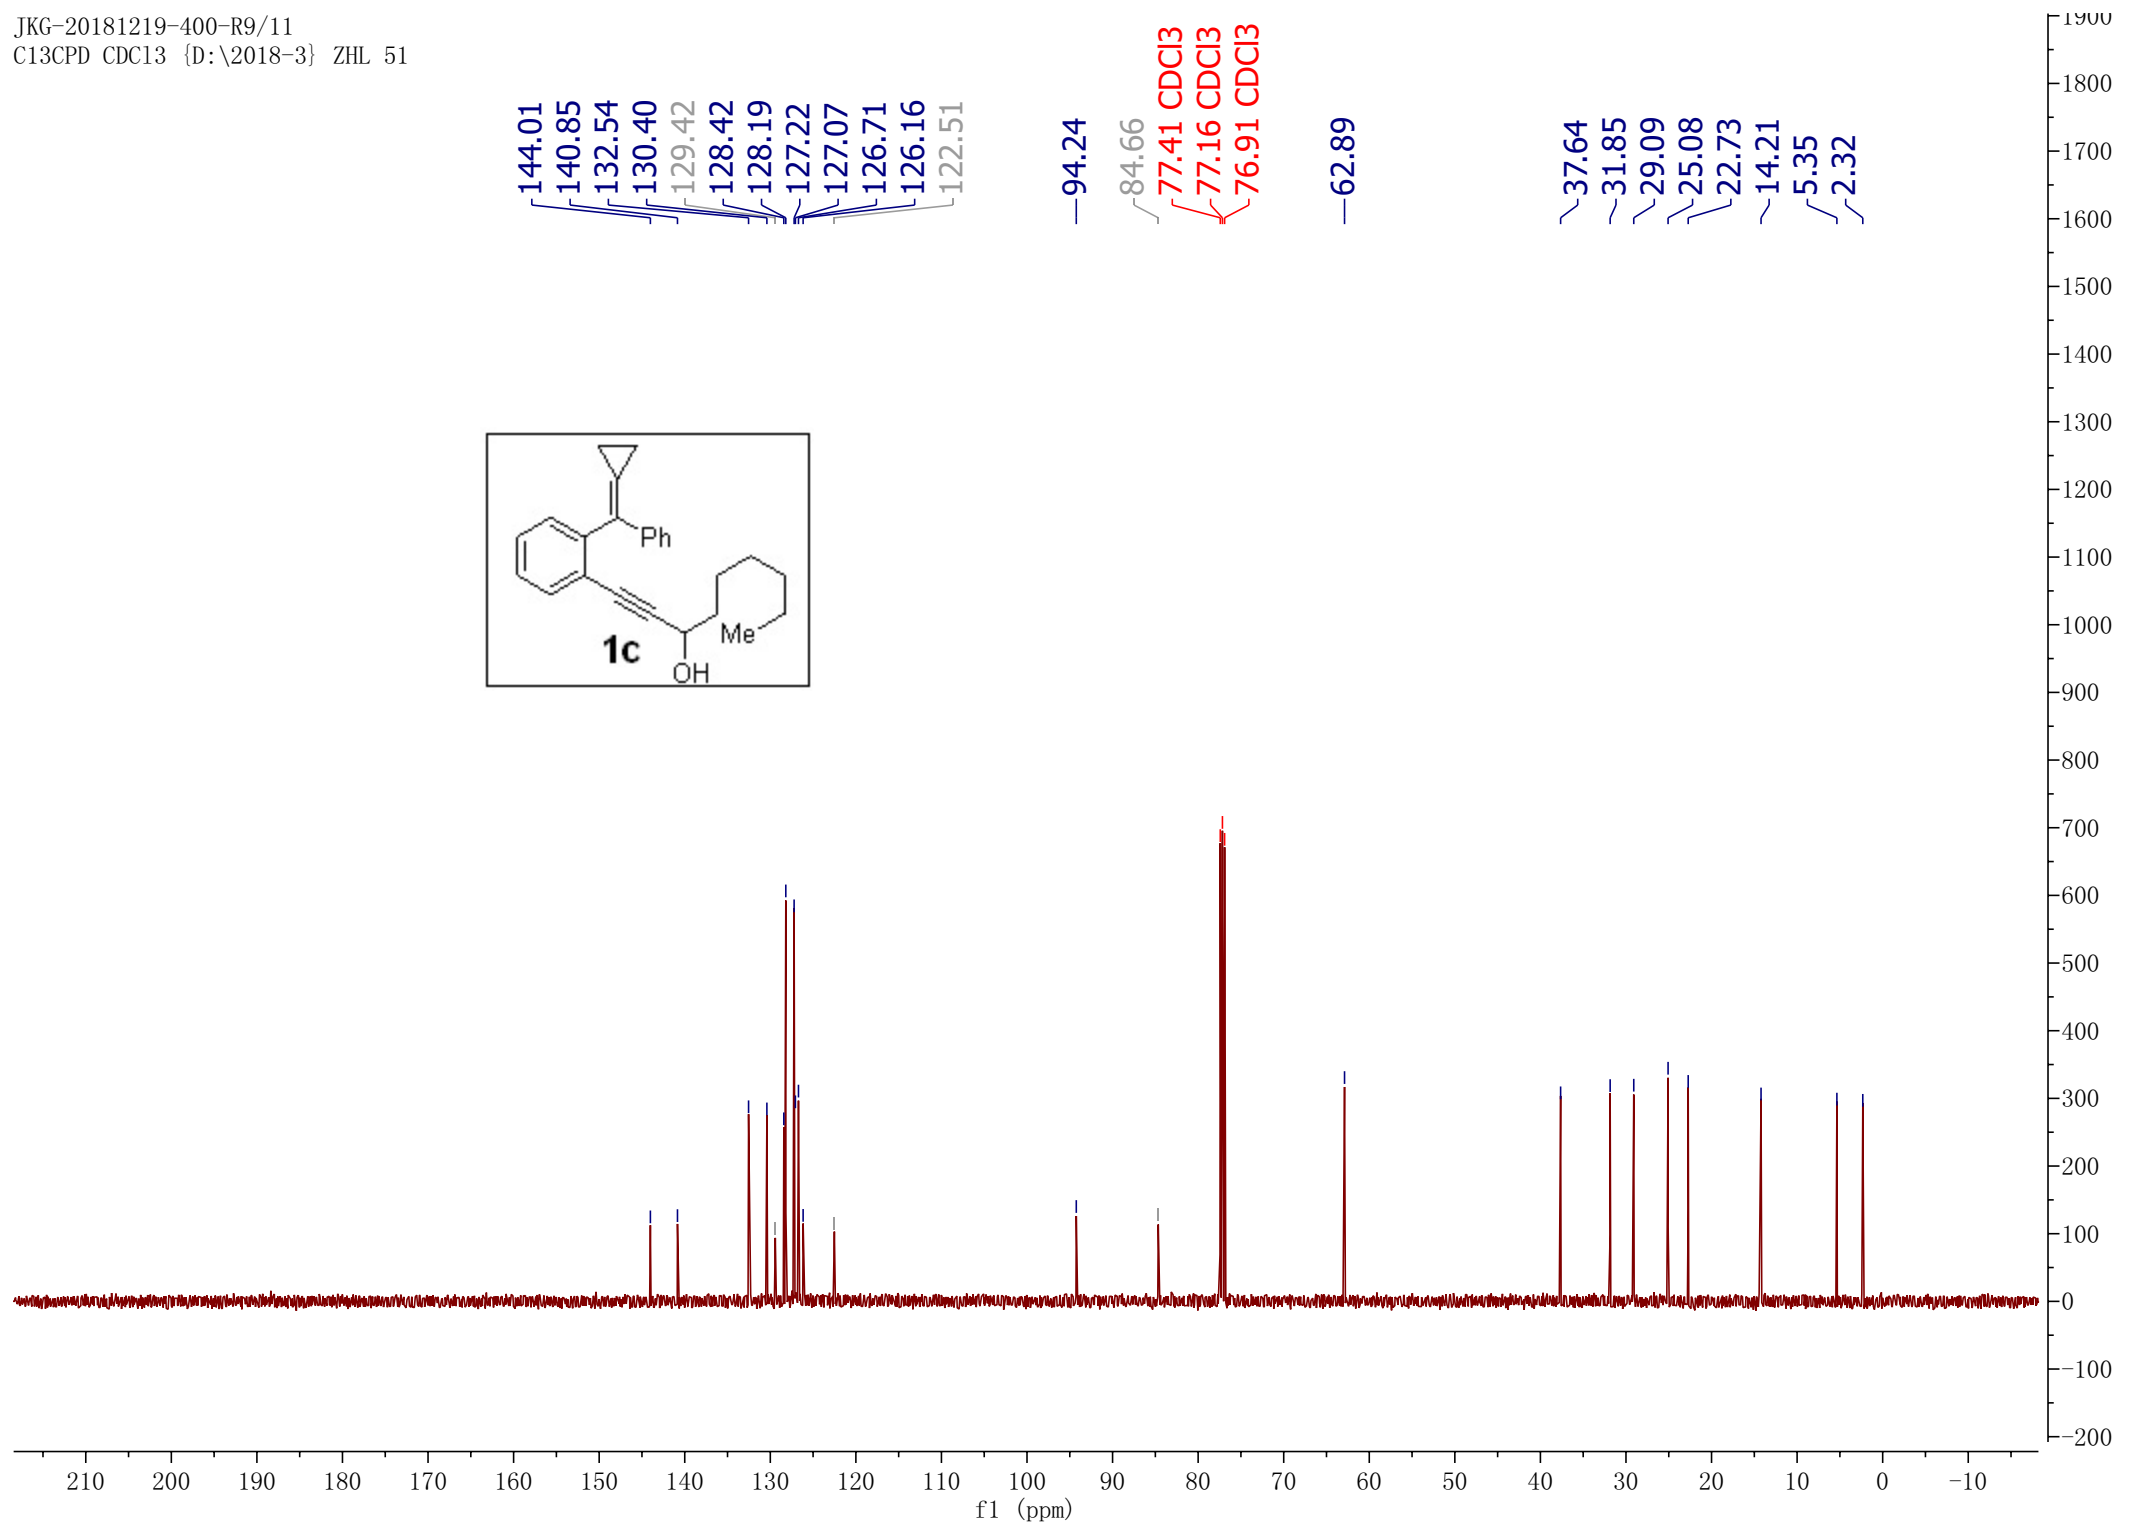

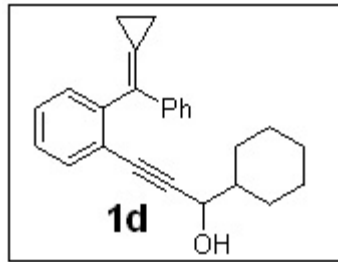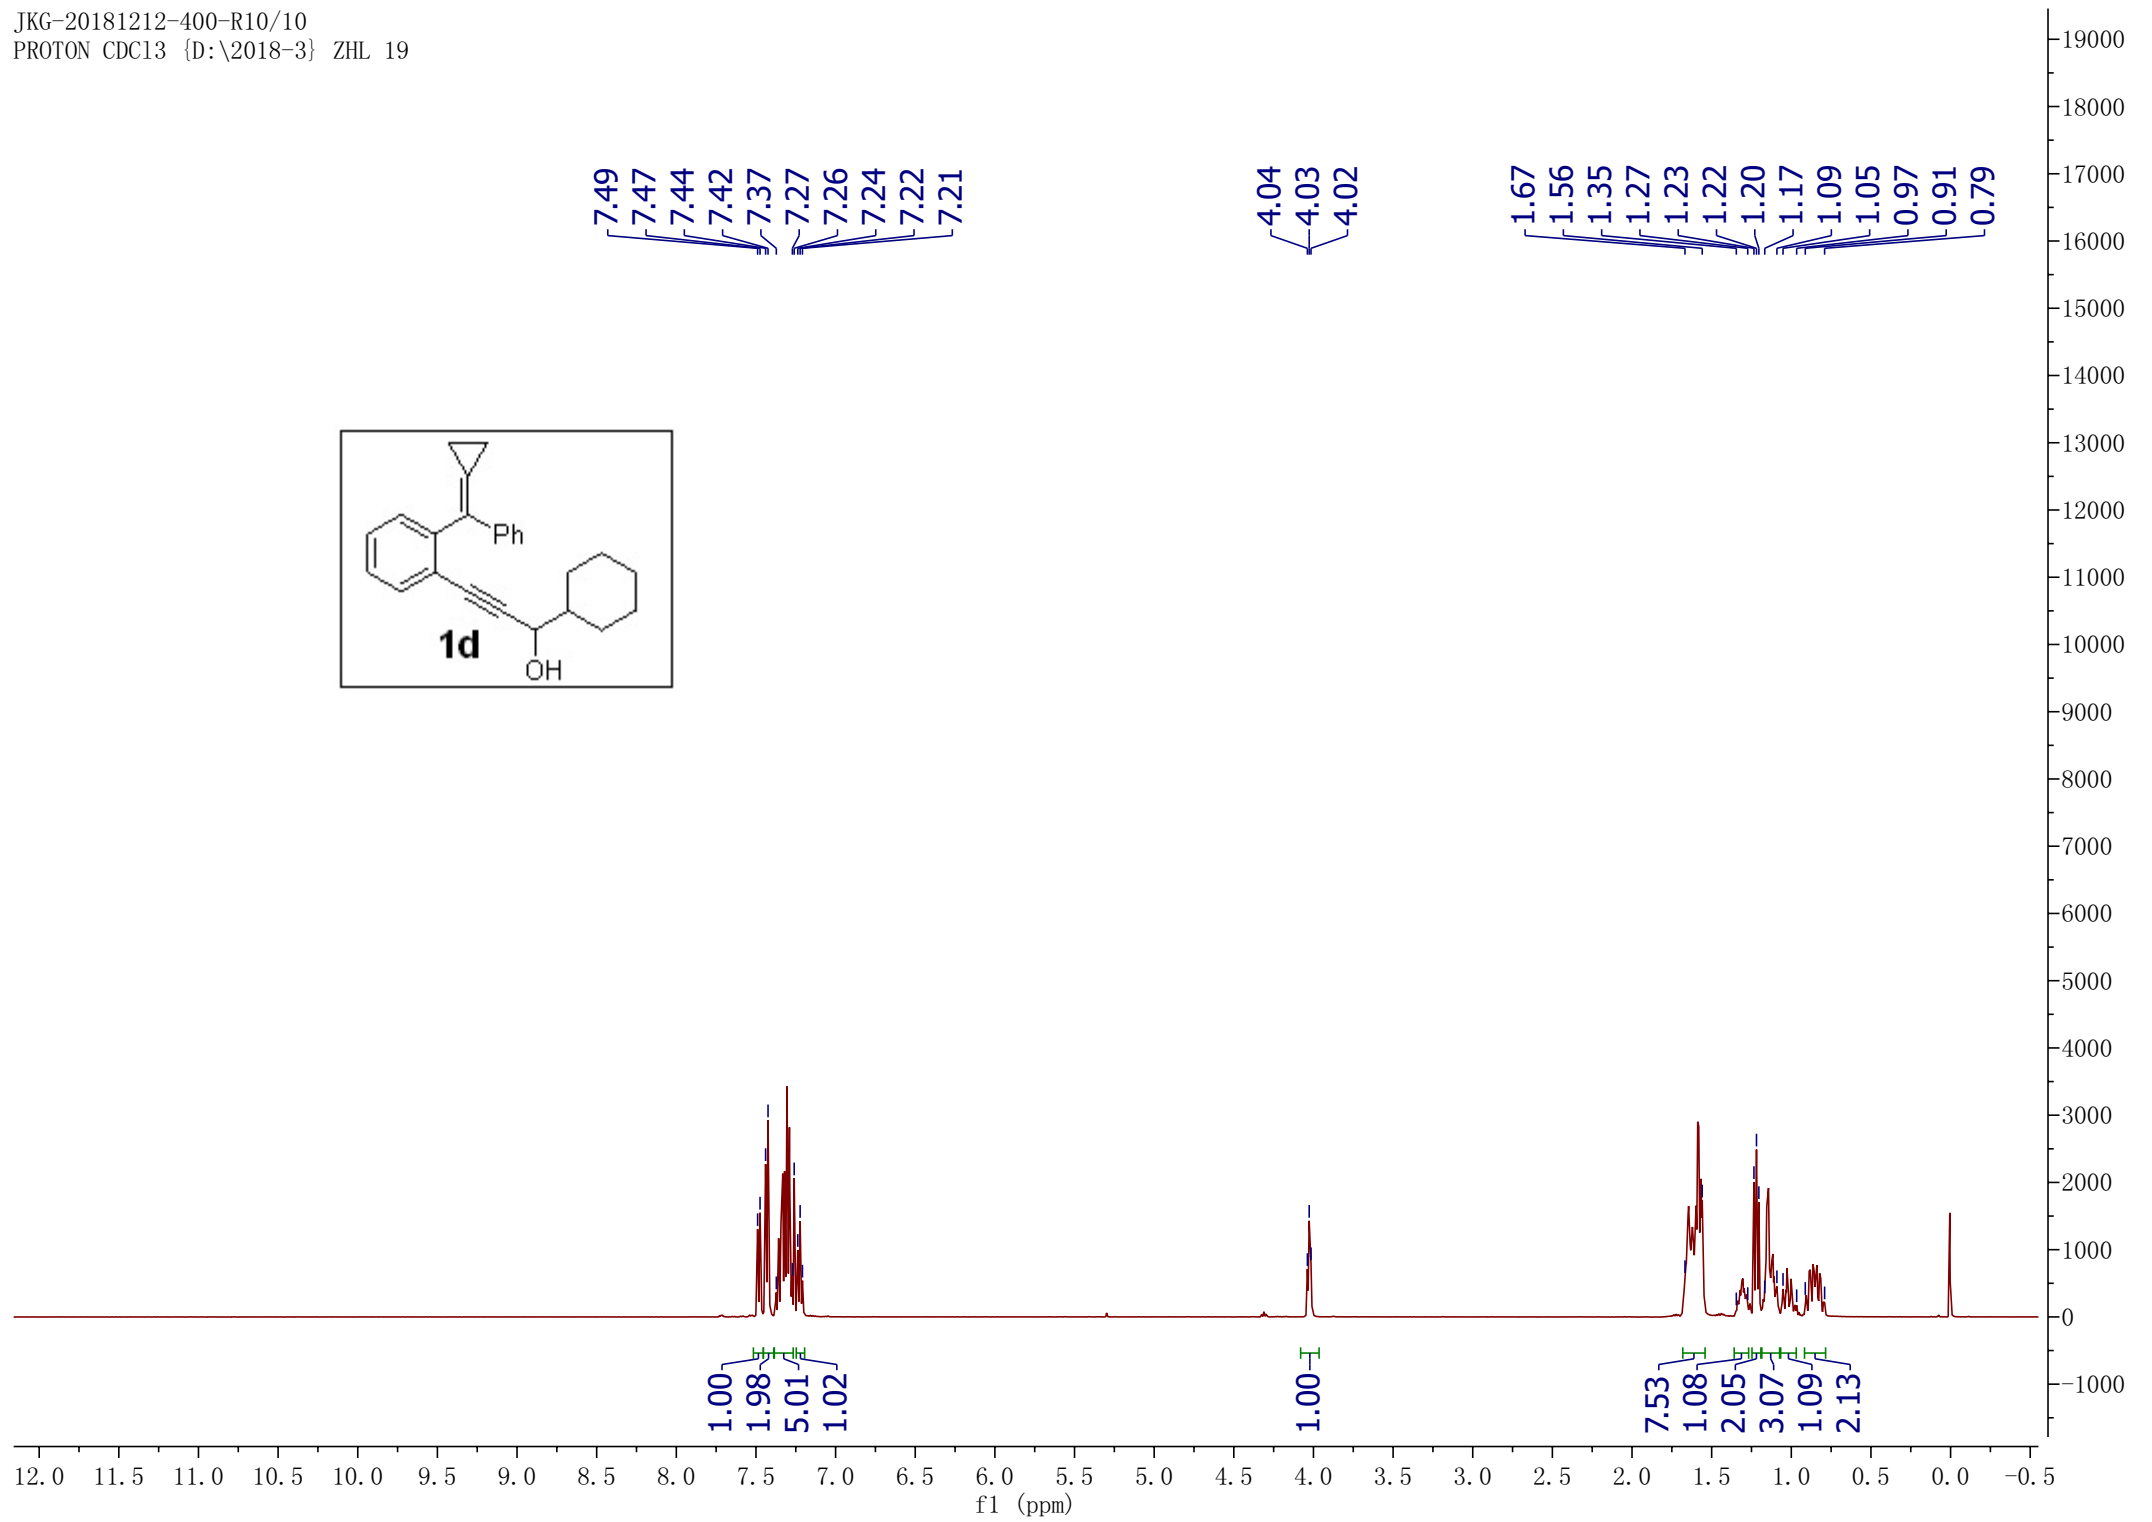



143.99  
140.55  
132.55  
130.34  
129.33  
128.41  
128.19  
127.05  
126.73  
125.87  
122.62

92.97  
85.40  
77.41 CDC13  
77.16 CDC13  
76.91 CDC13

67.59

44.10

28.48  
27.91  
26.39  
26.01  
25.99

5.46  
2.06

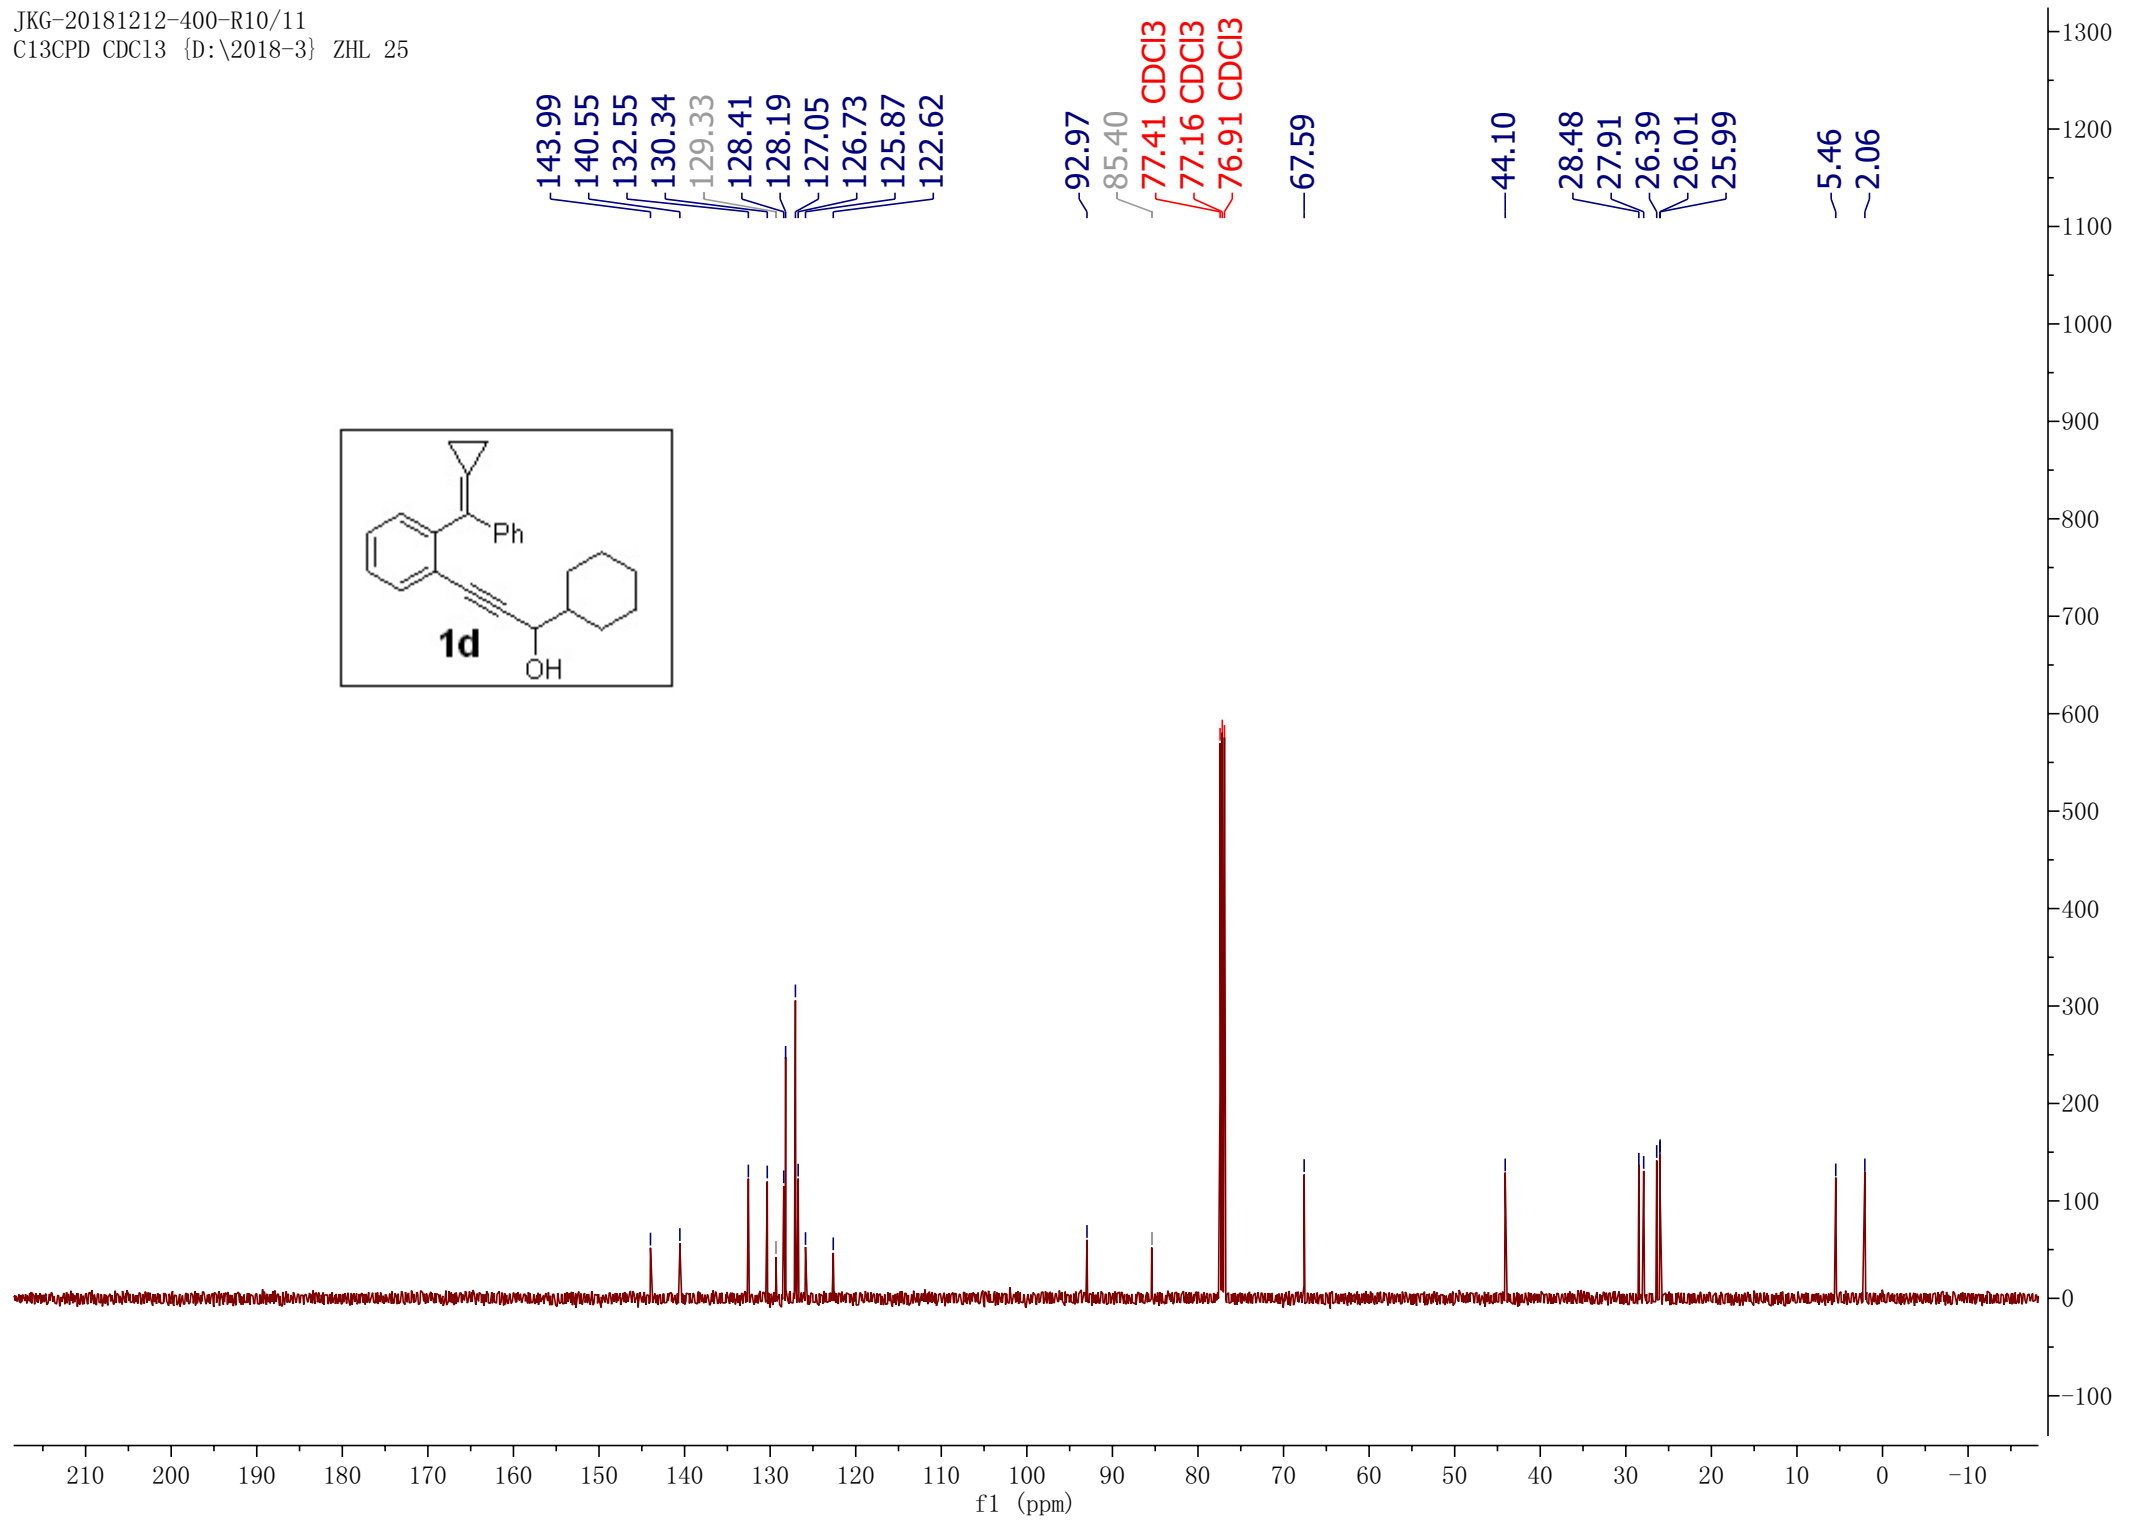



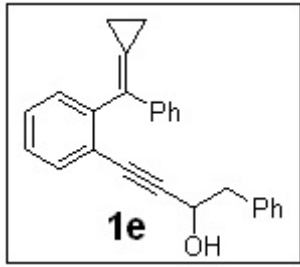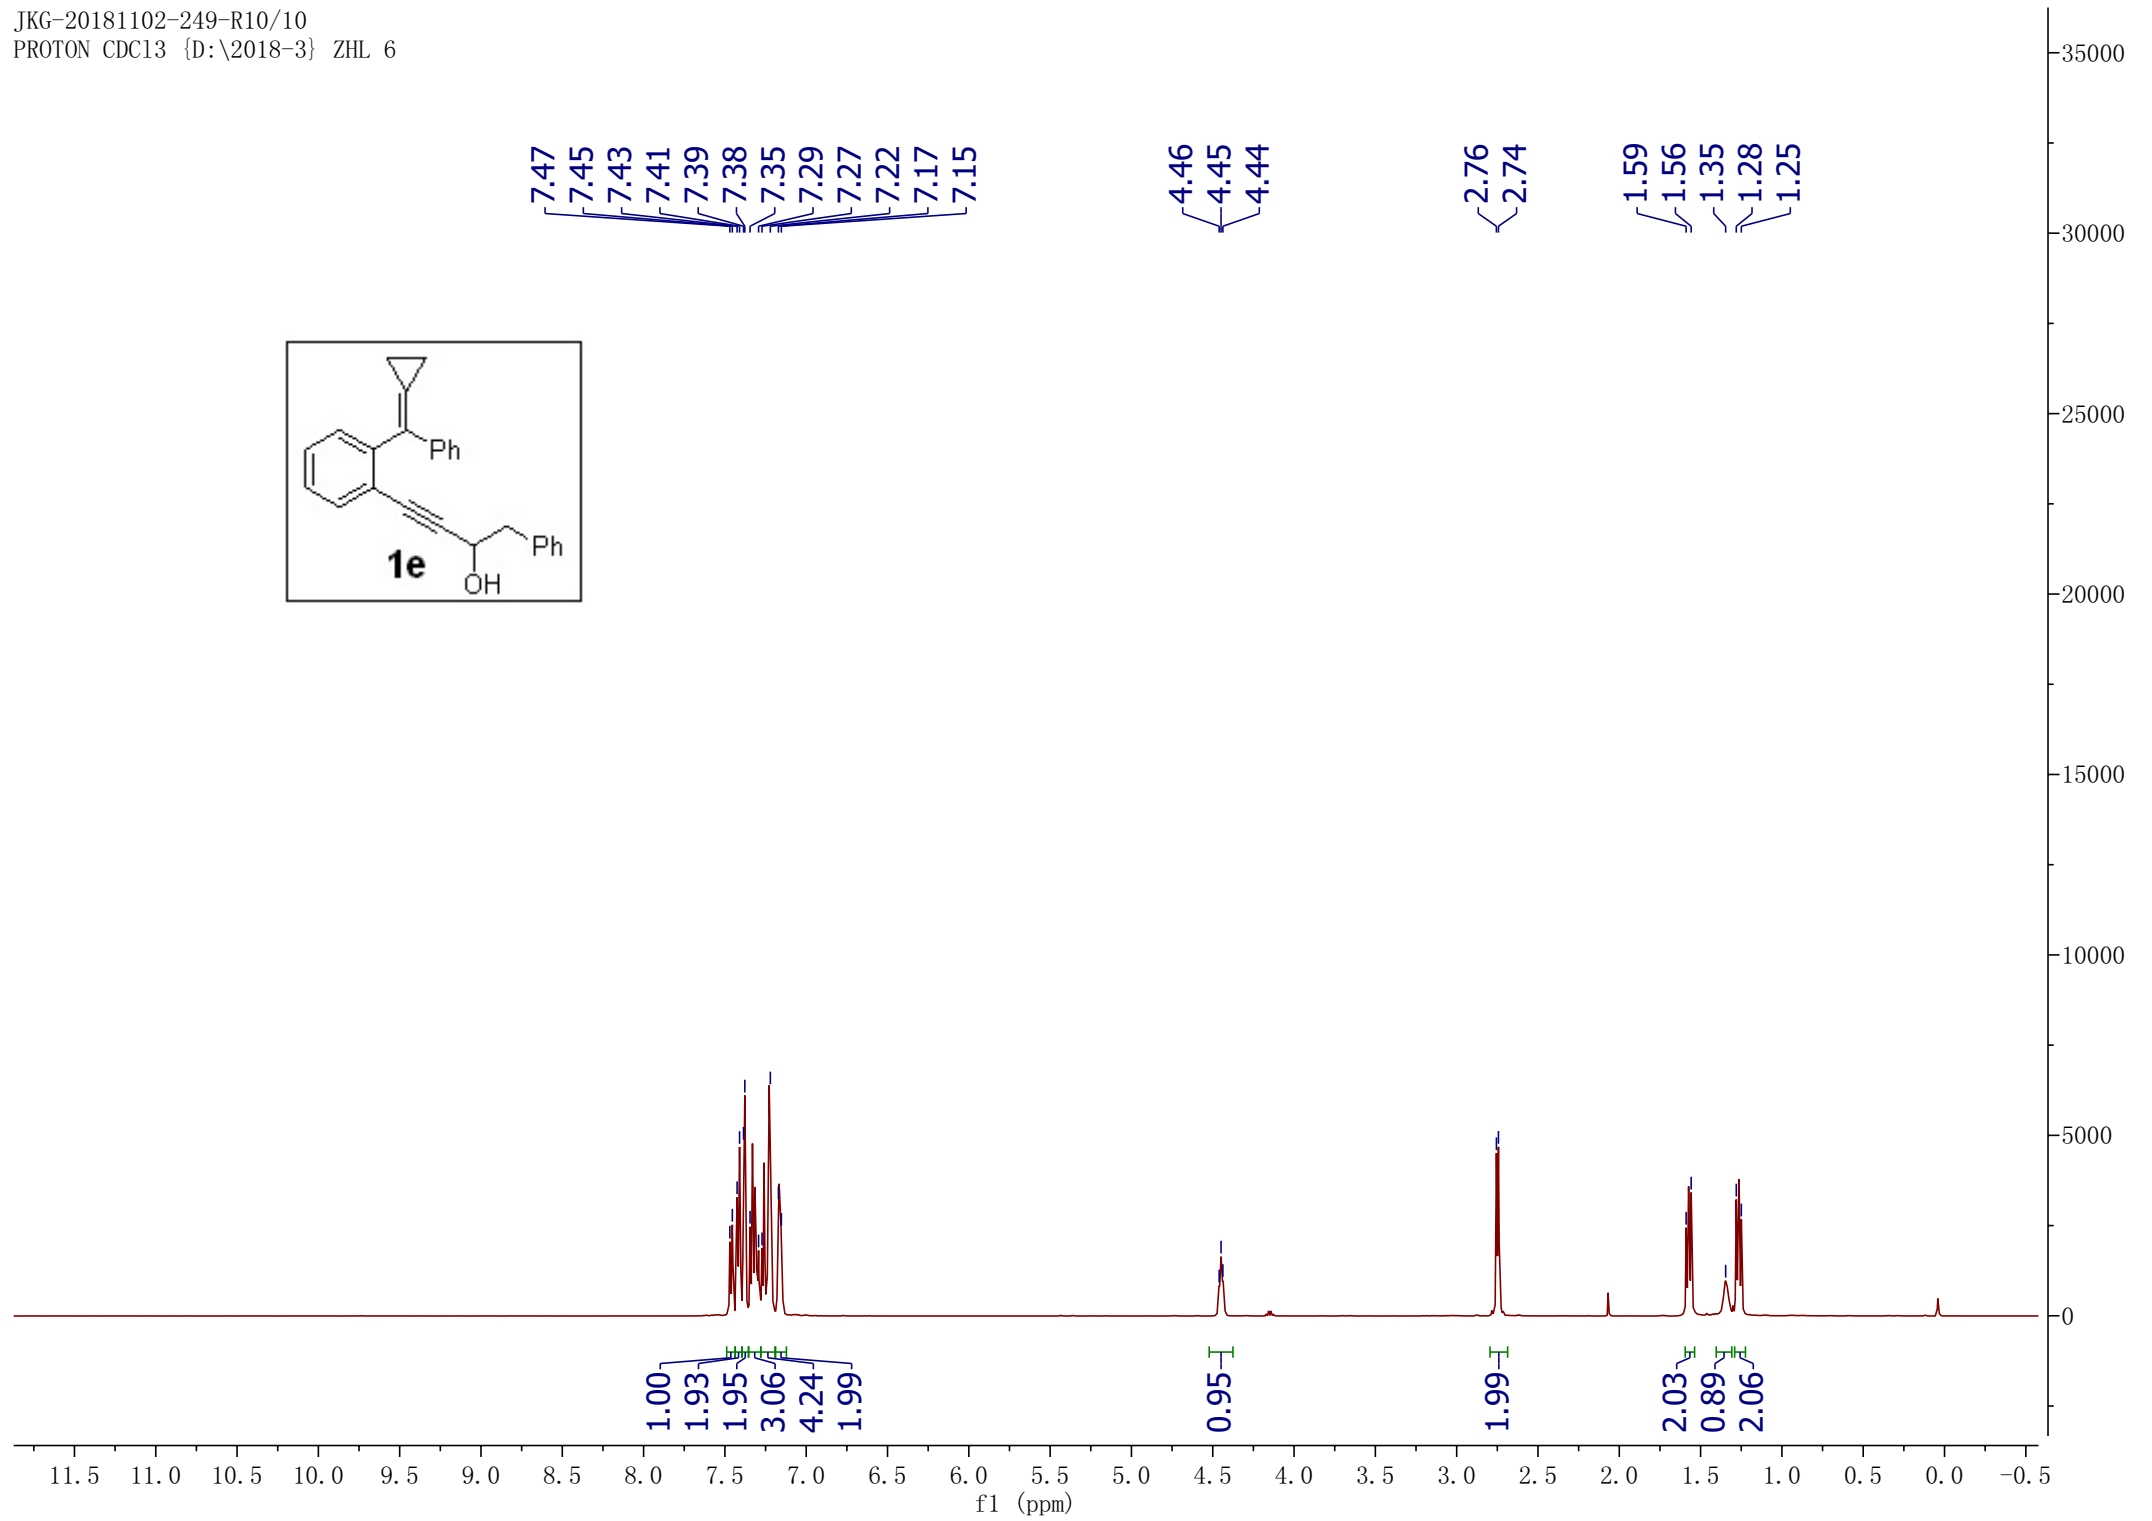

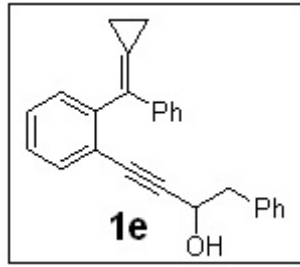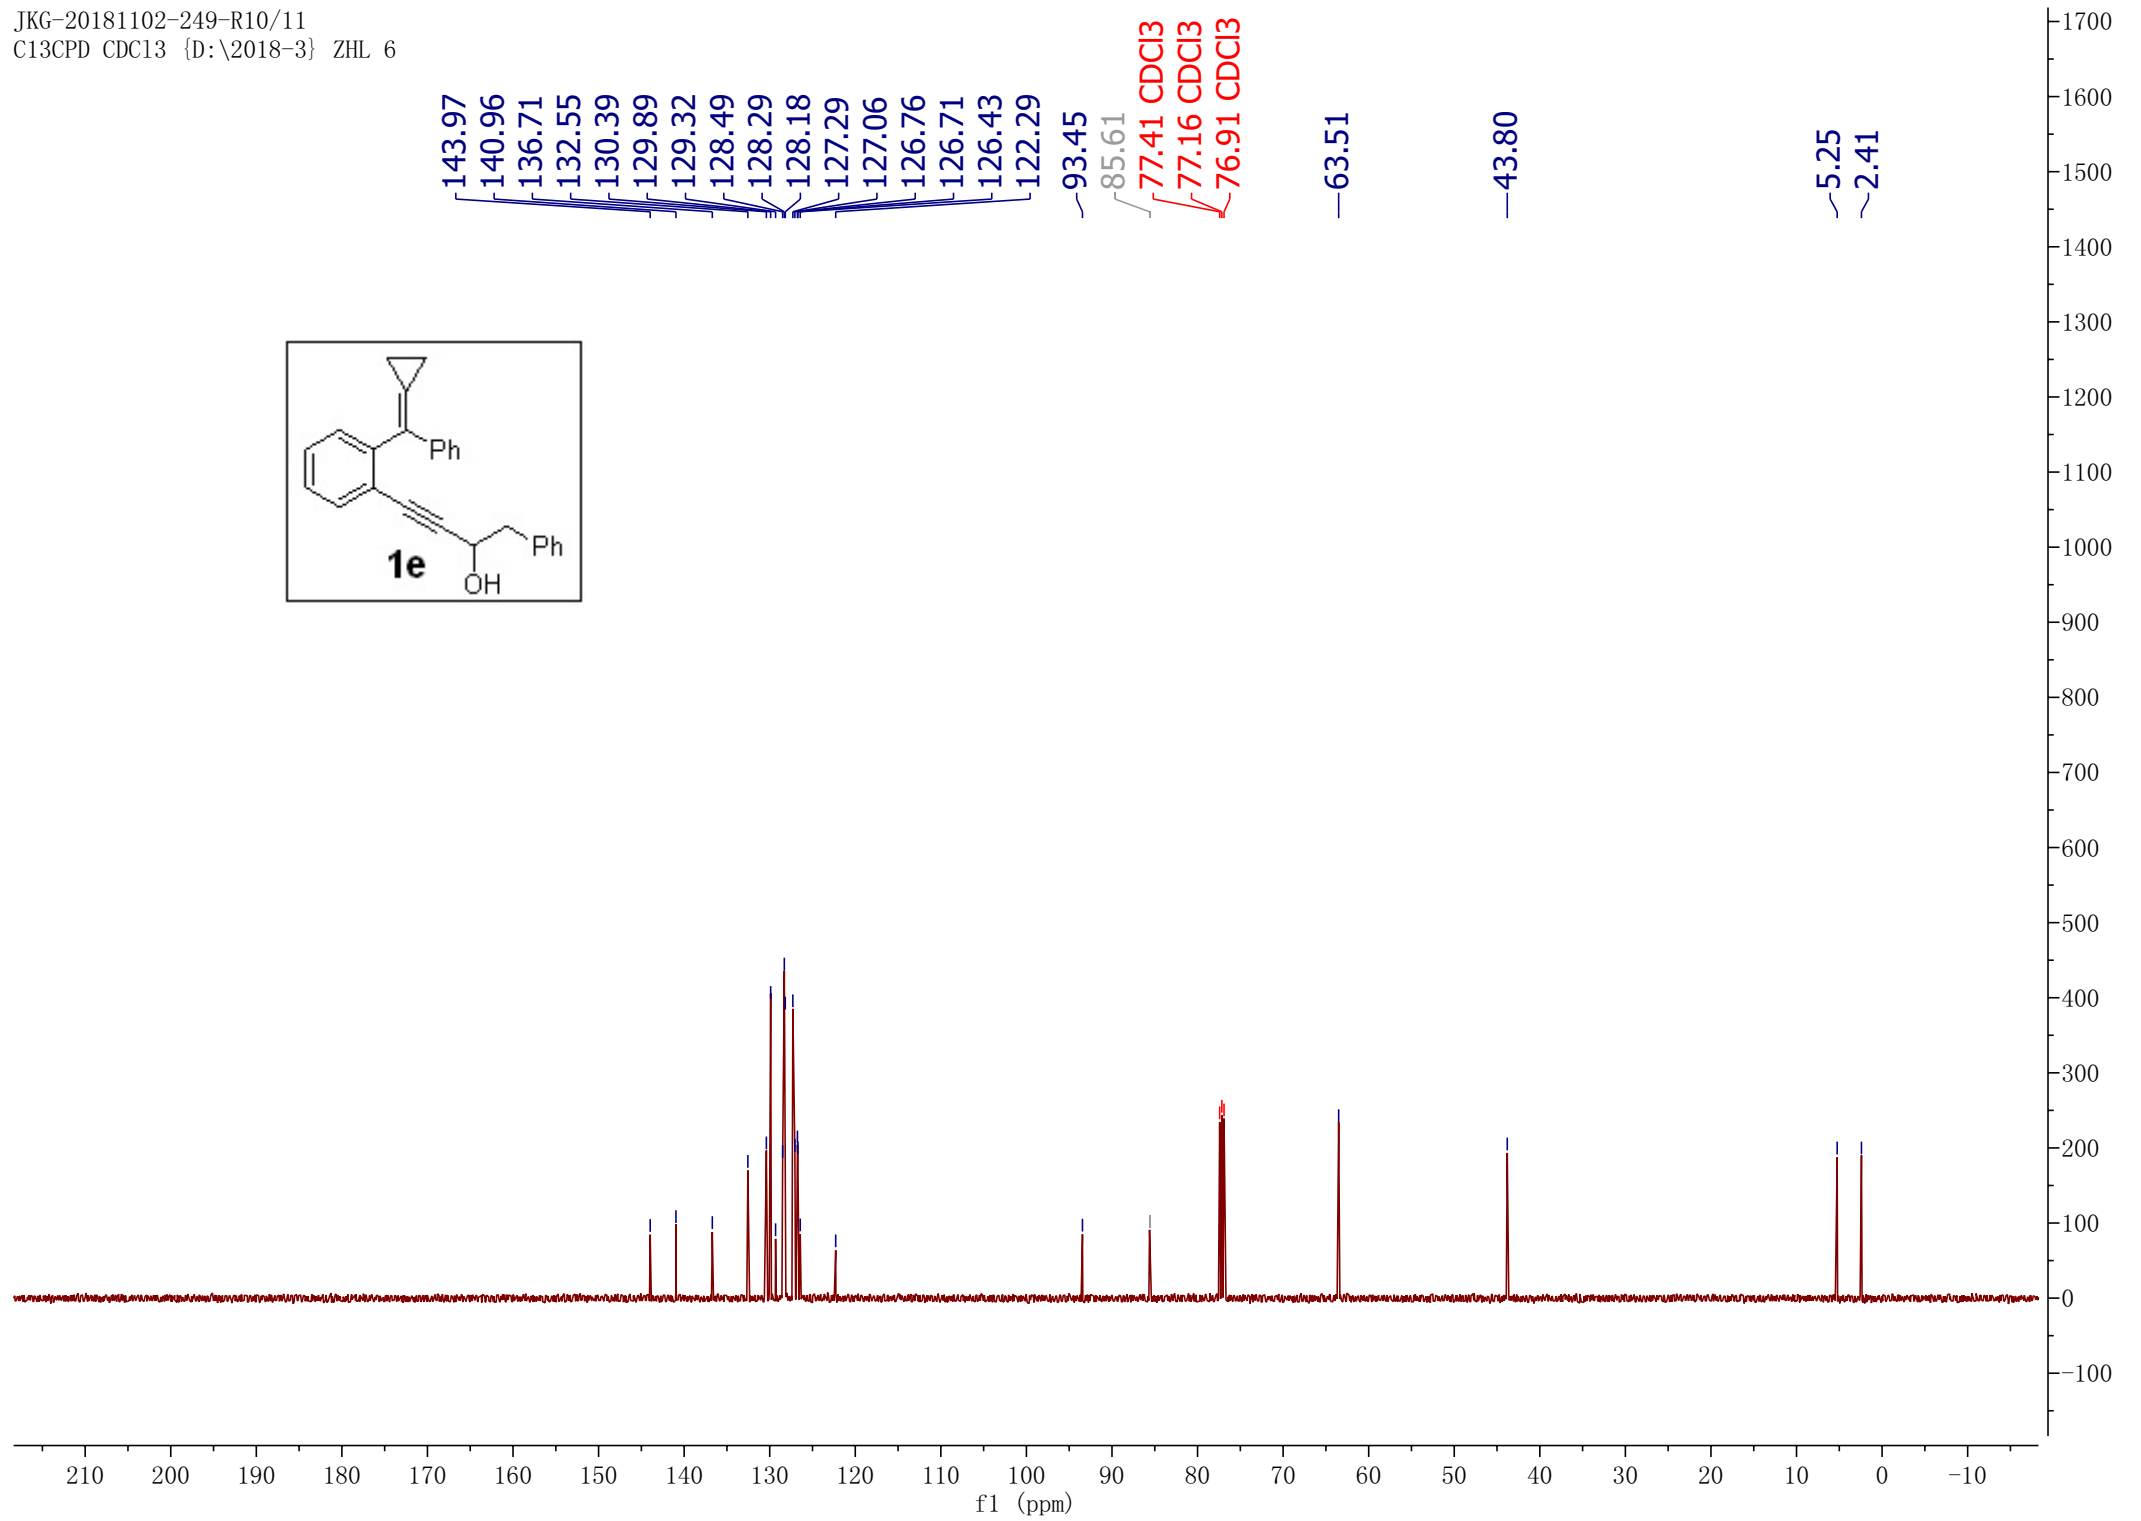

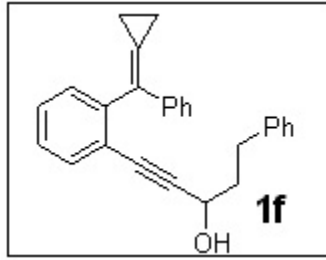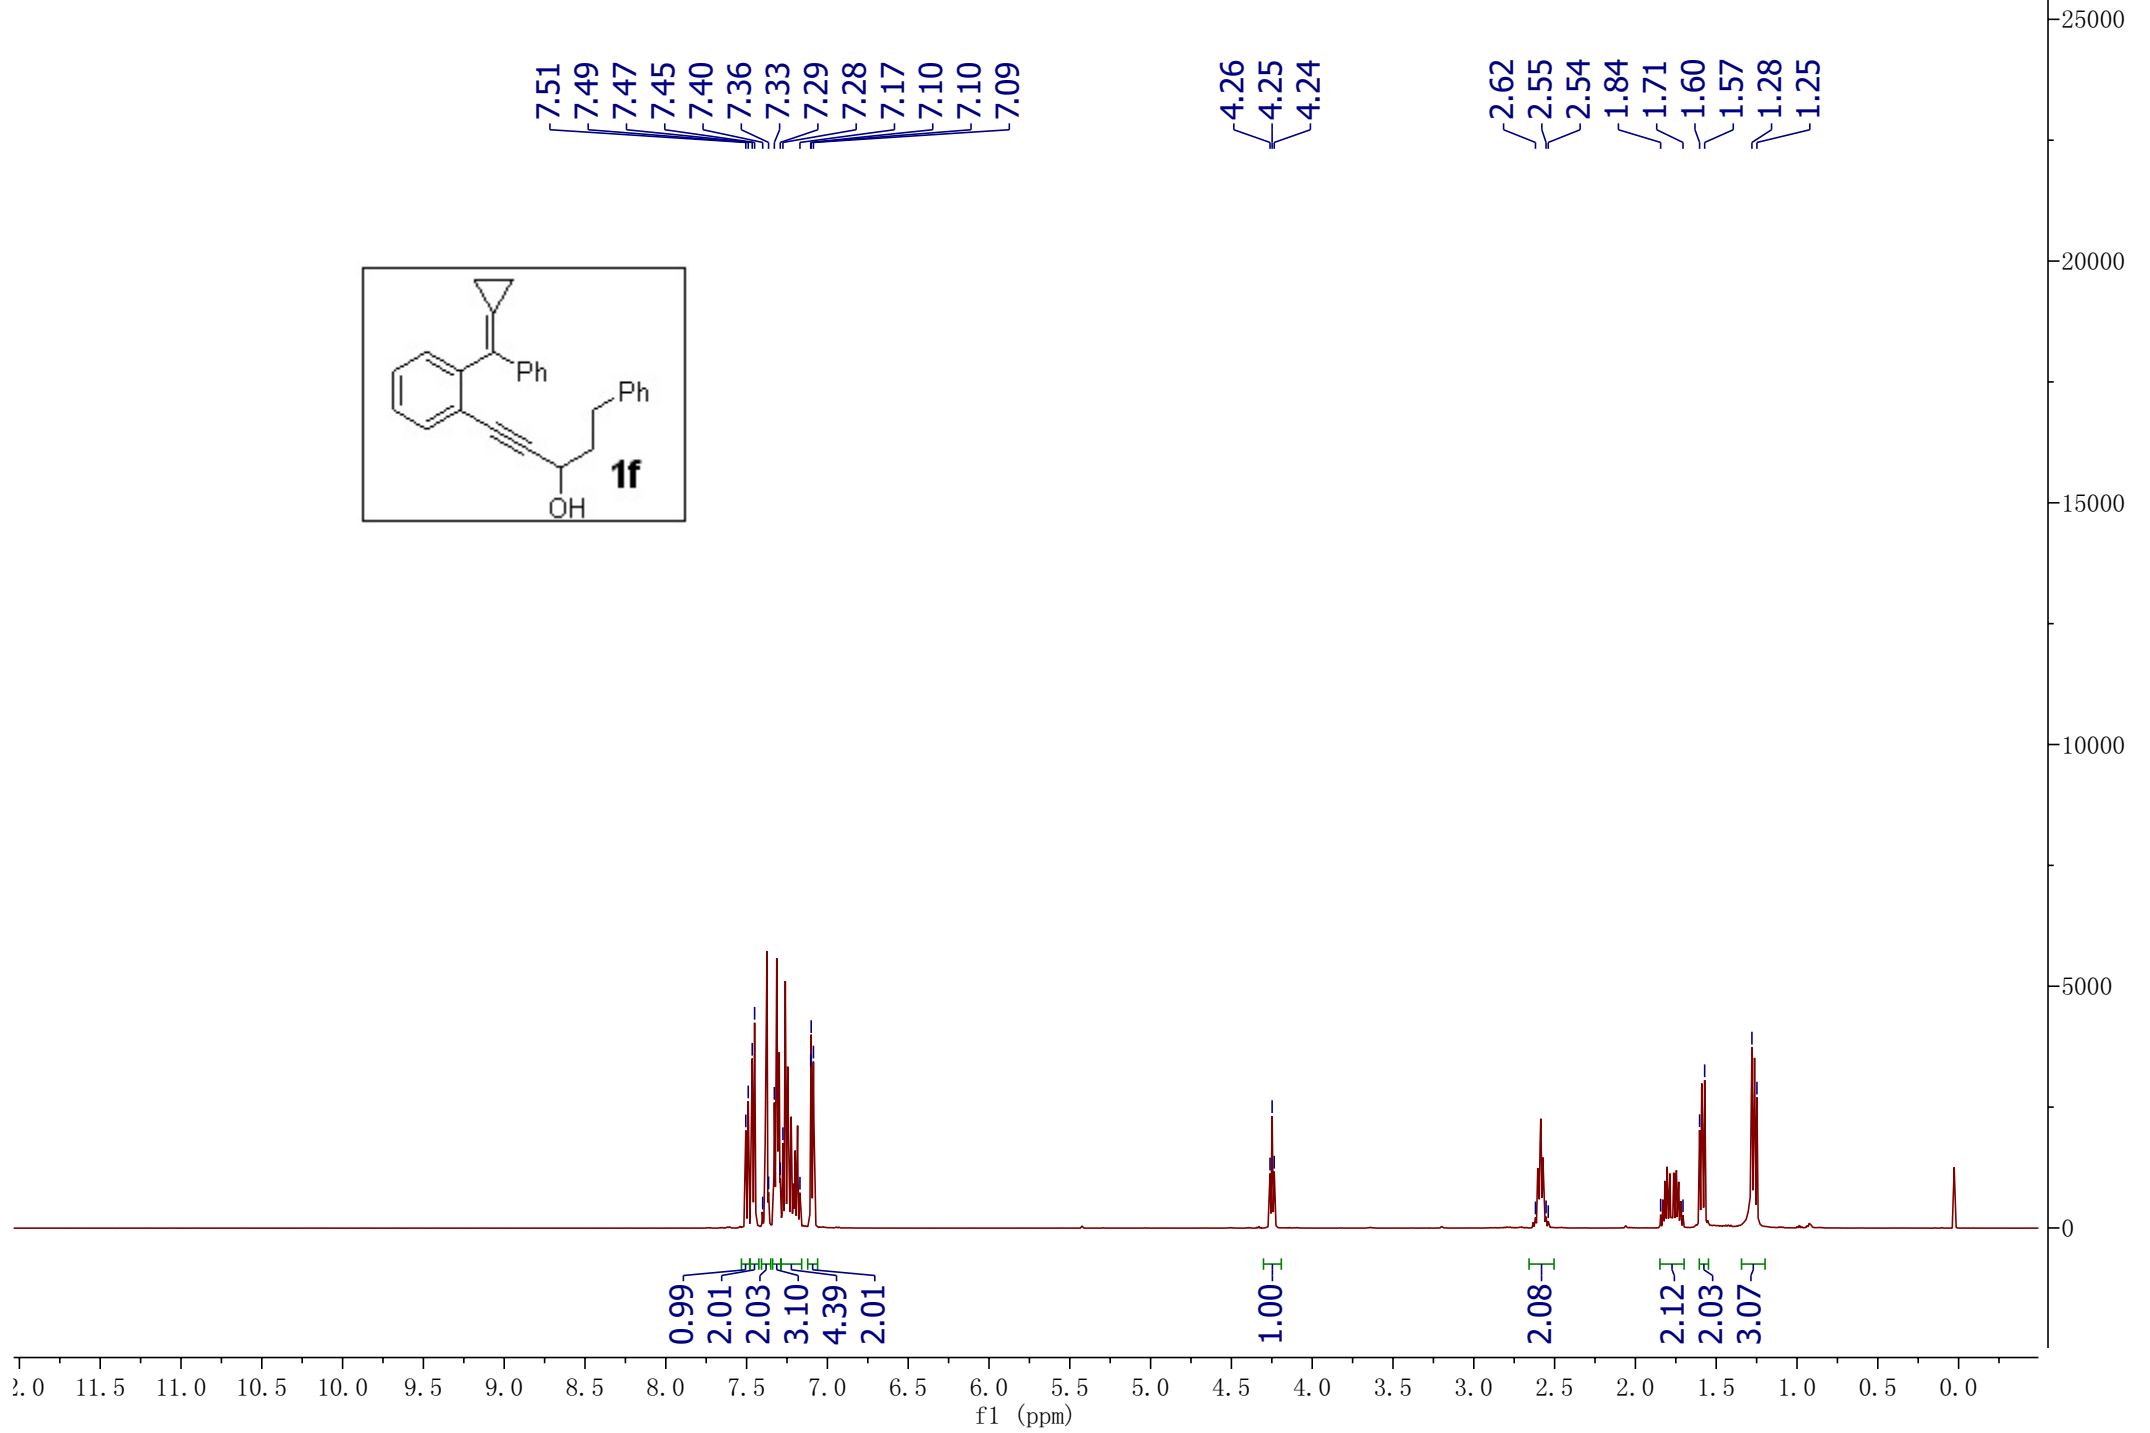

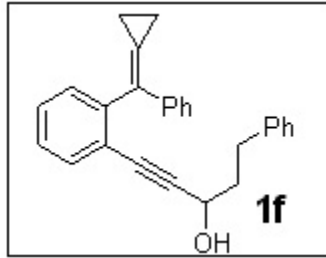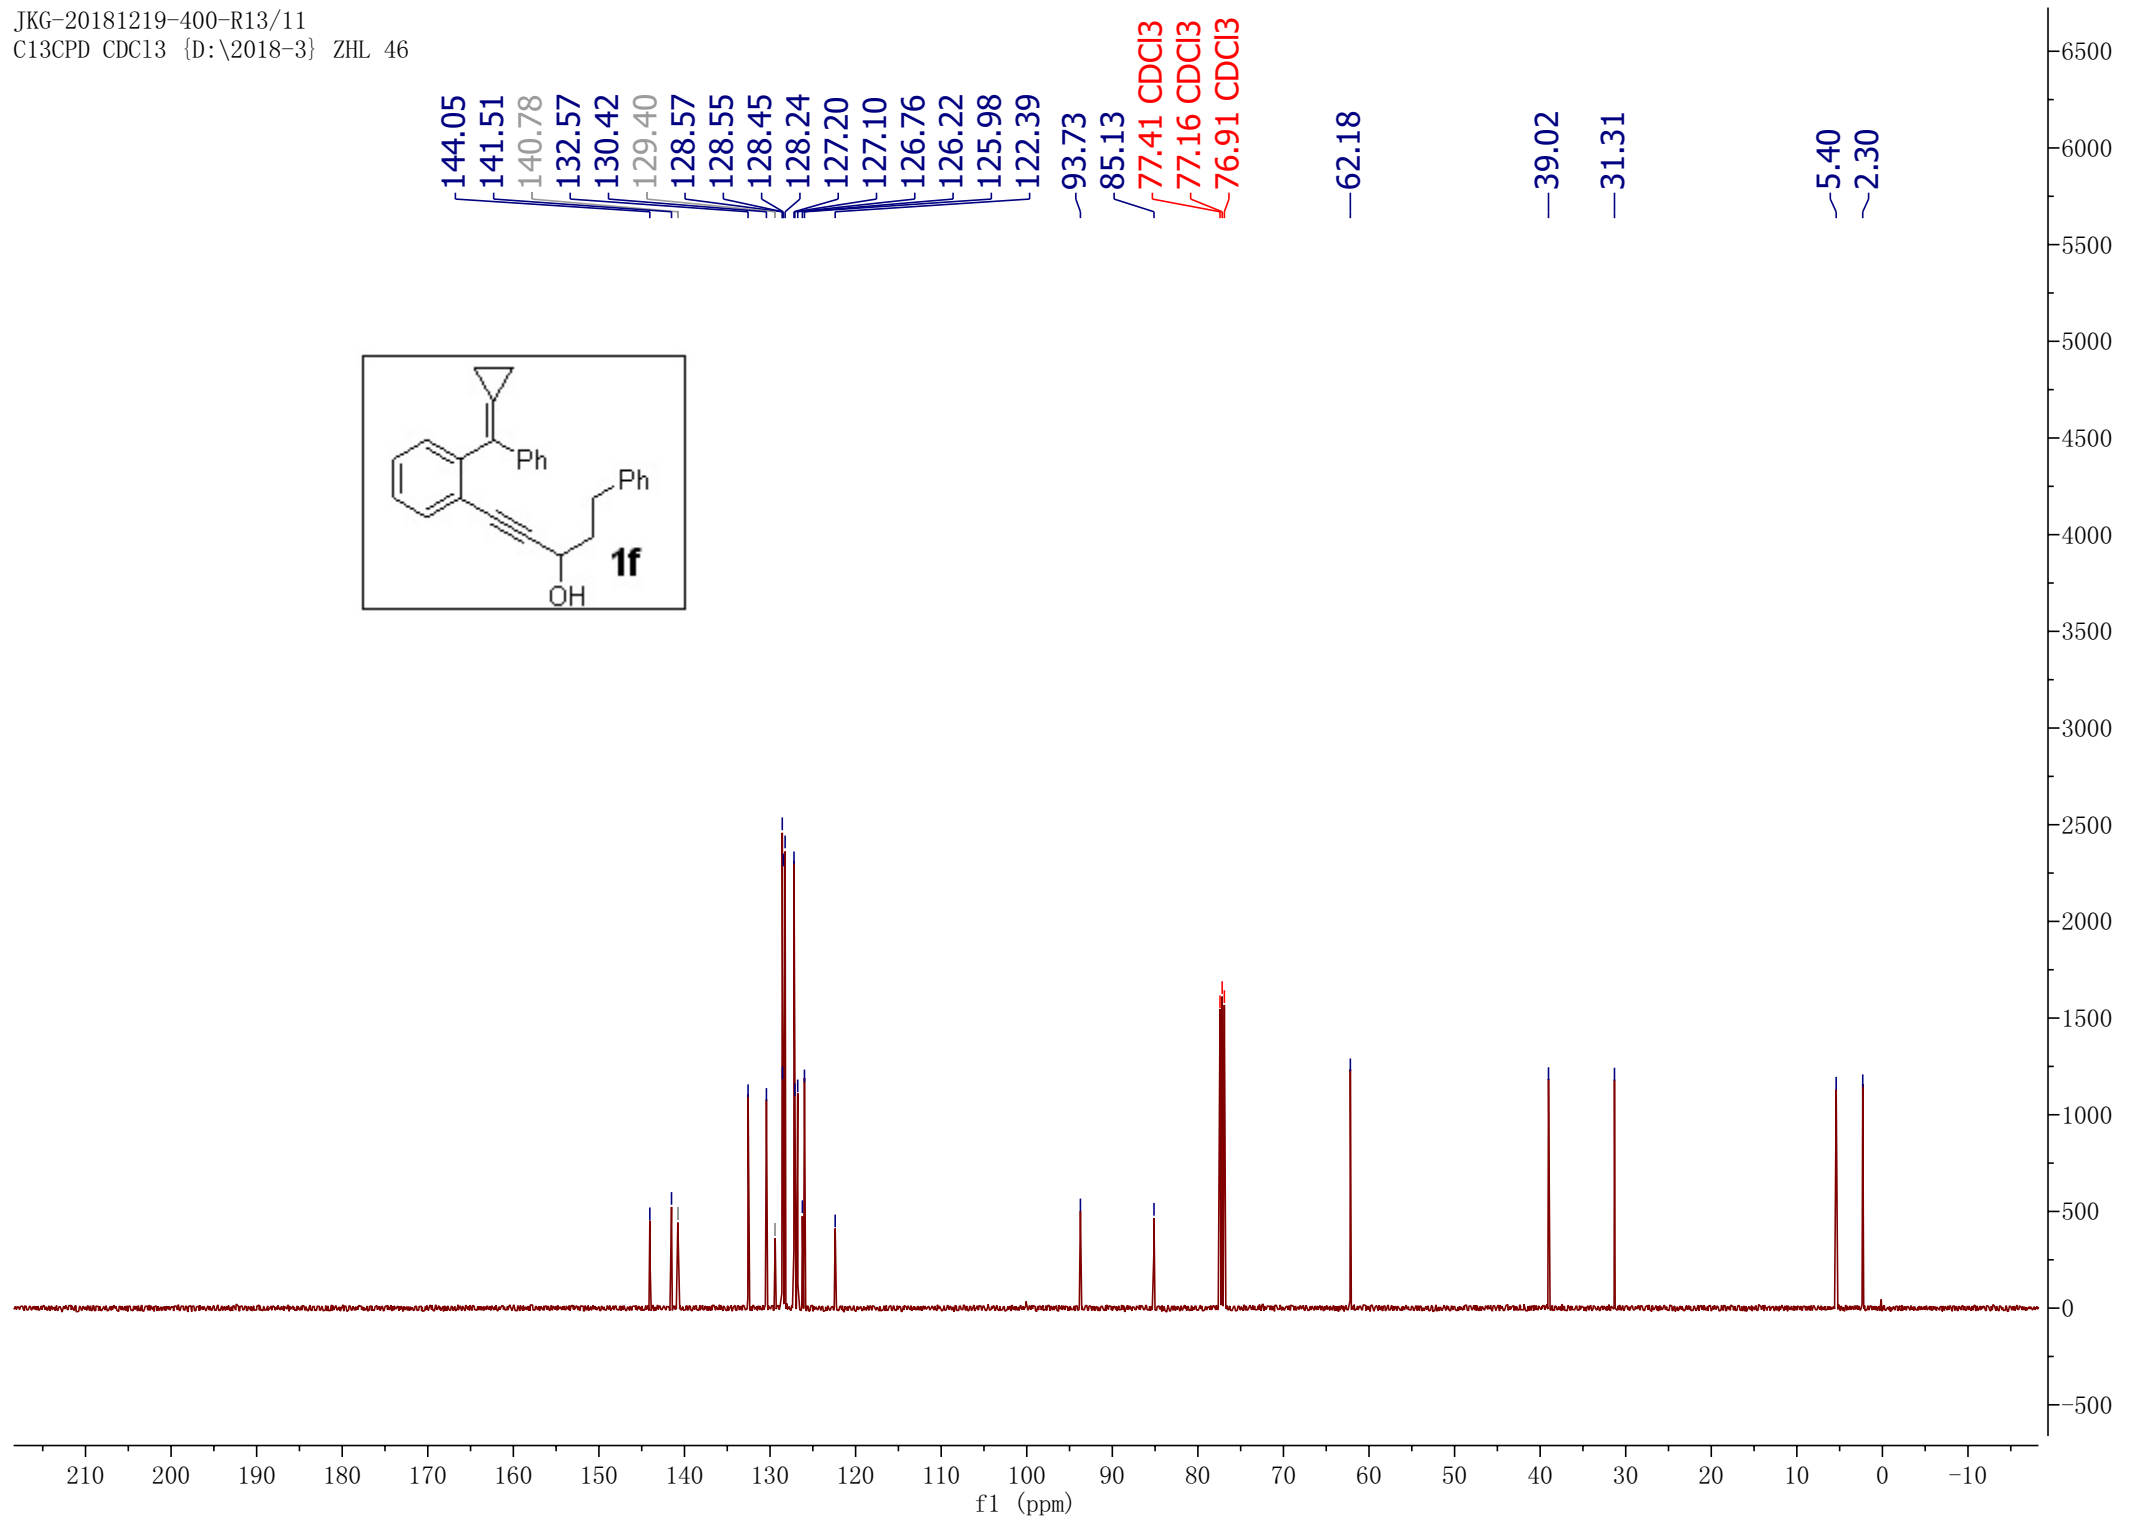

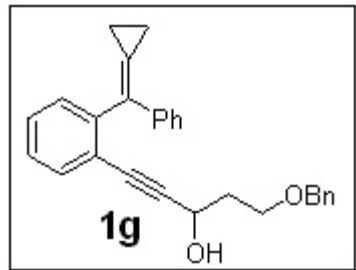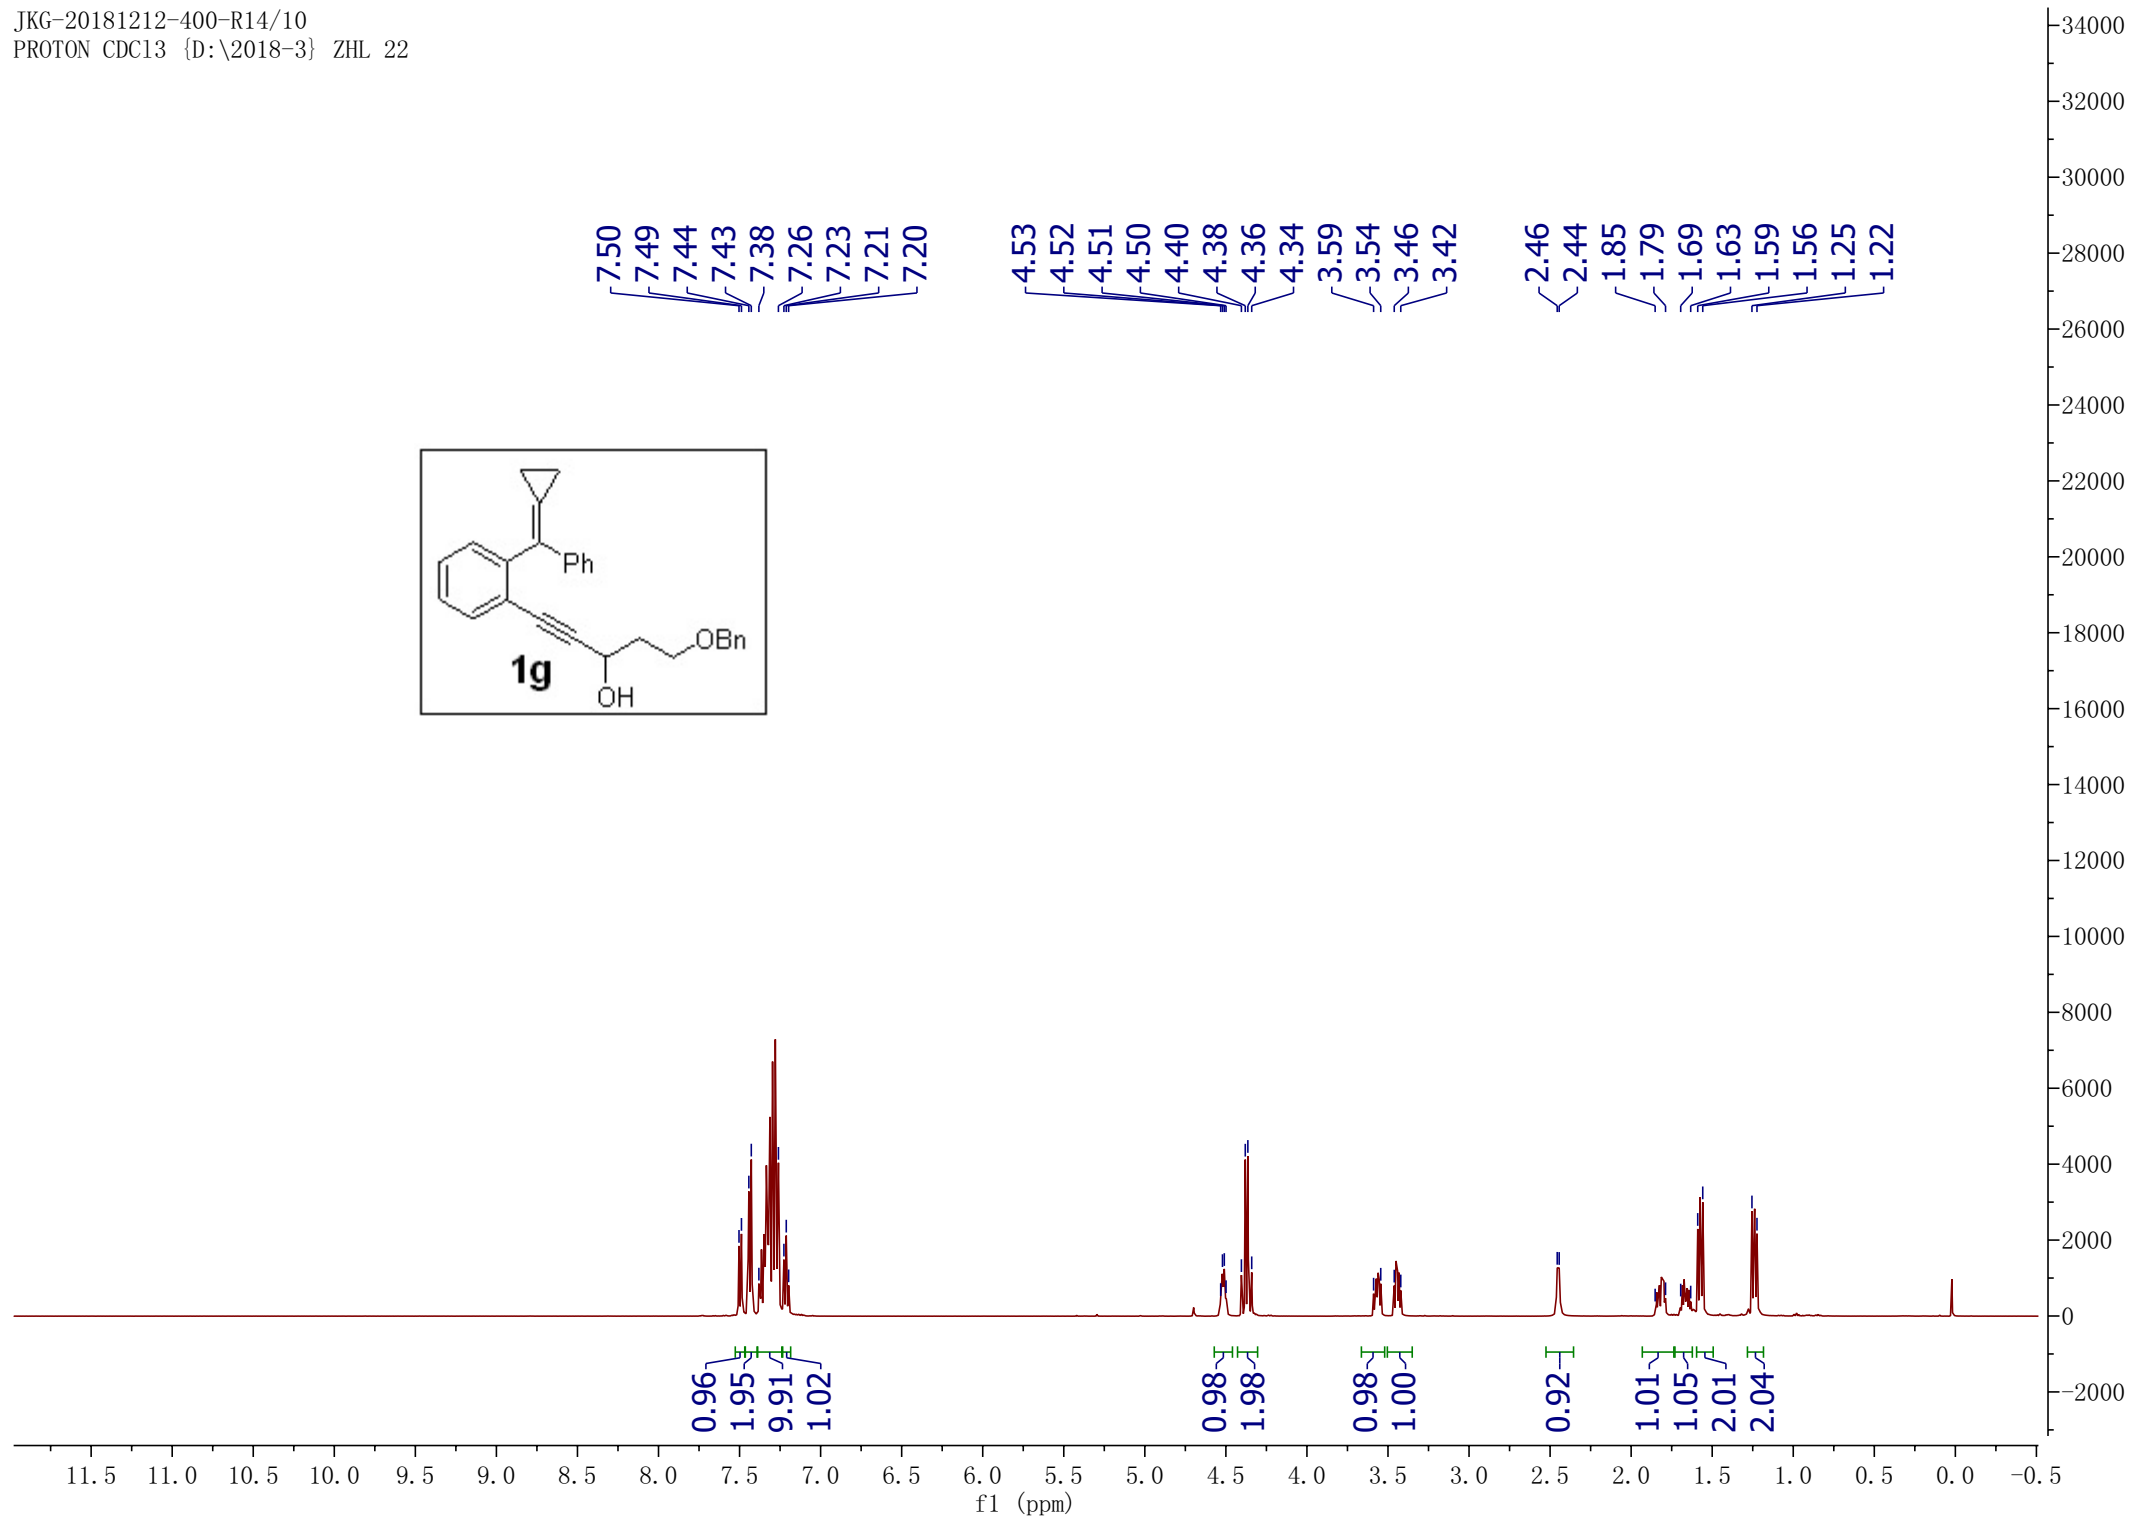

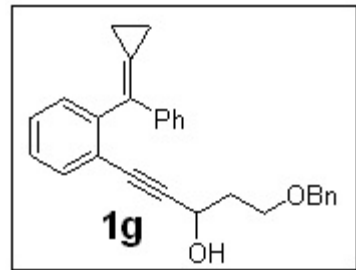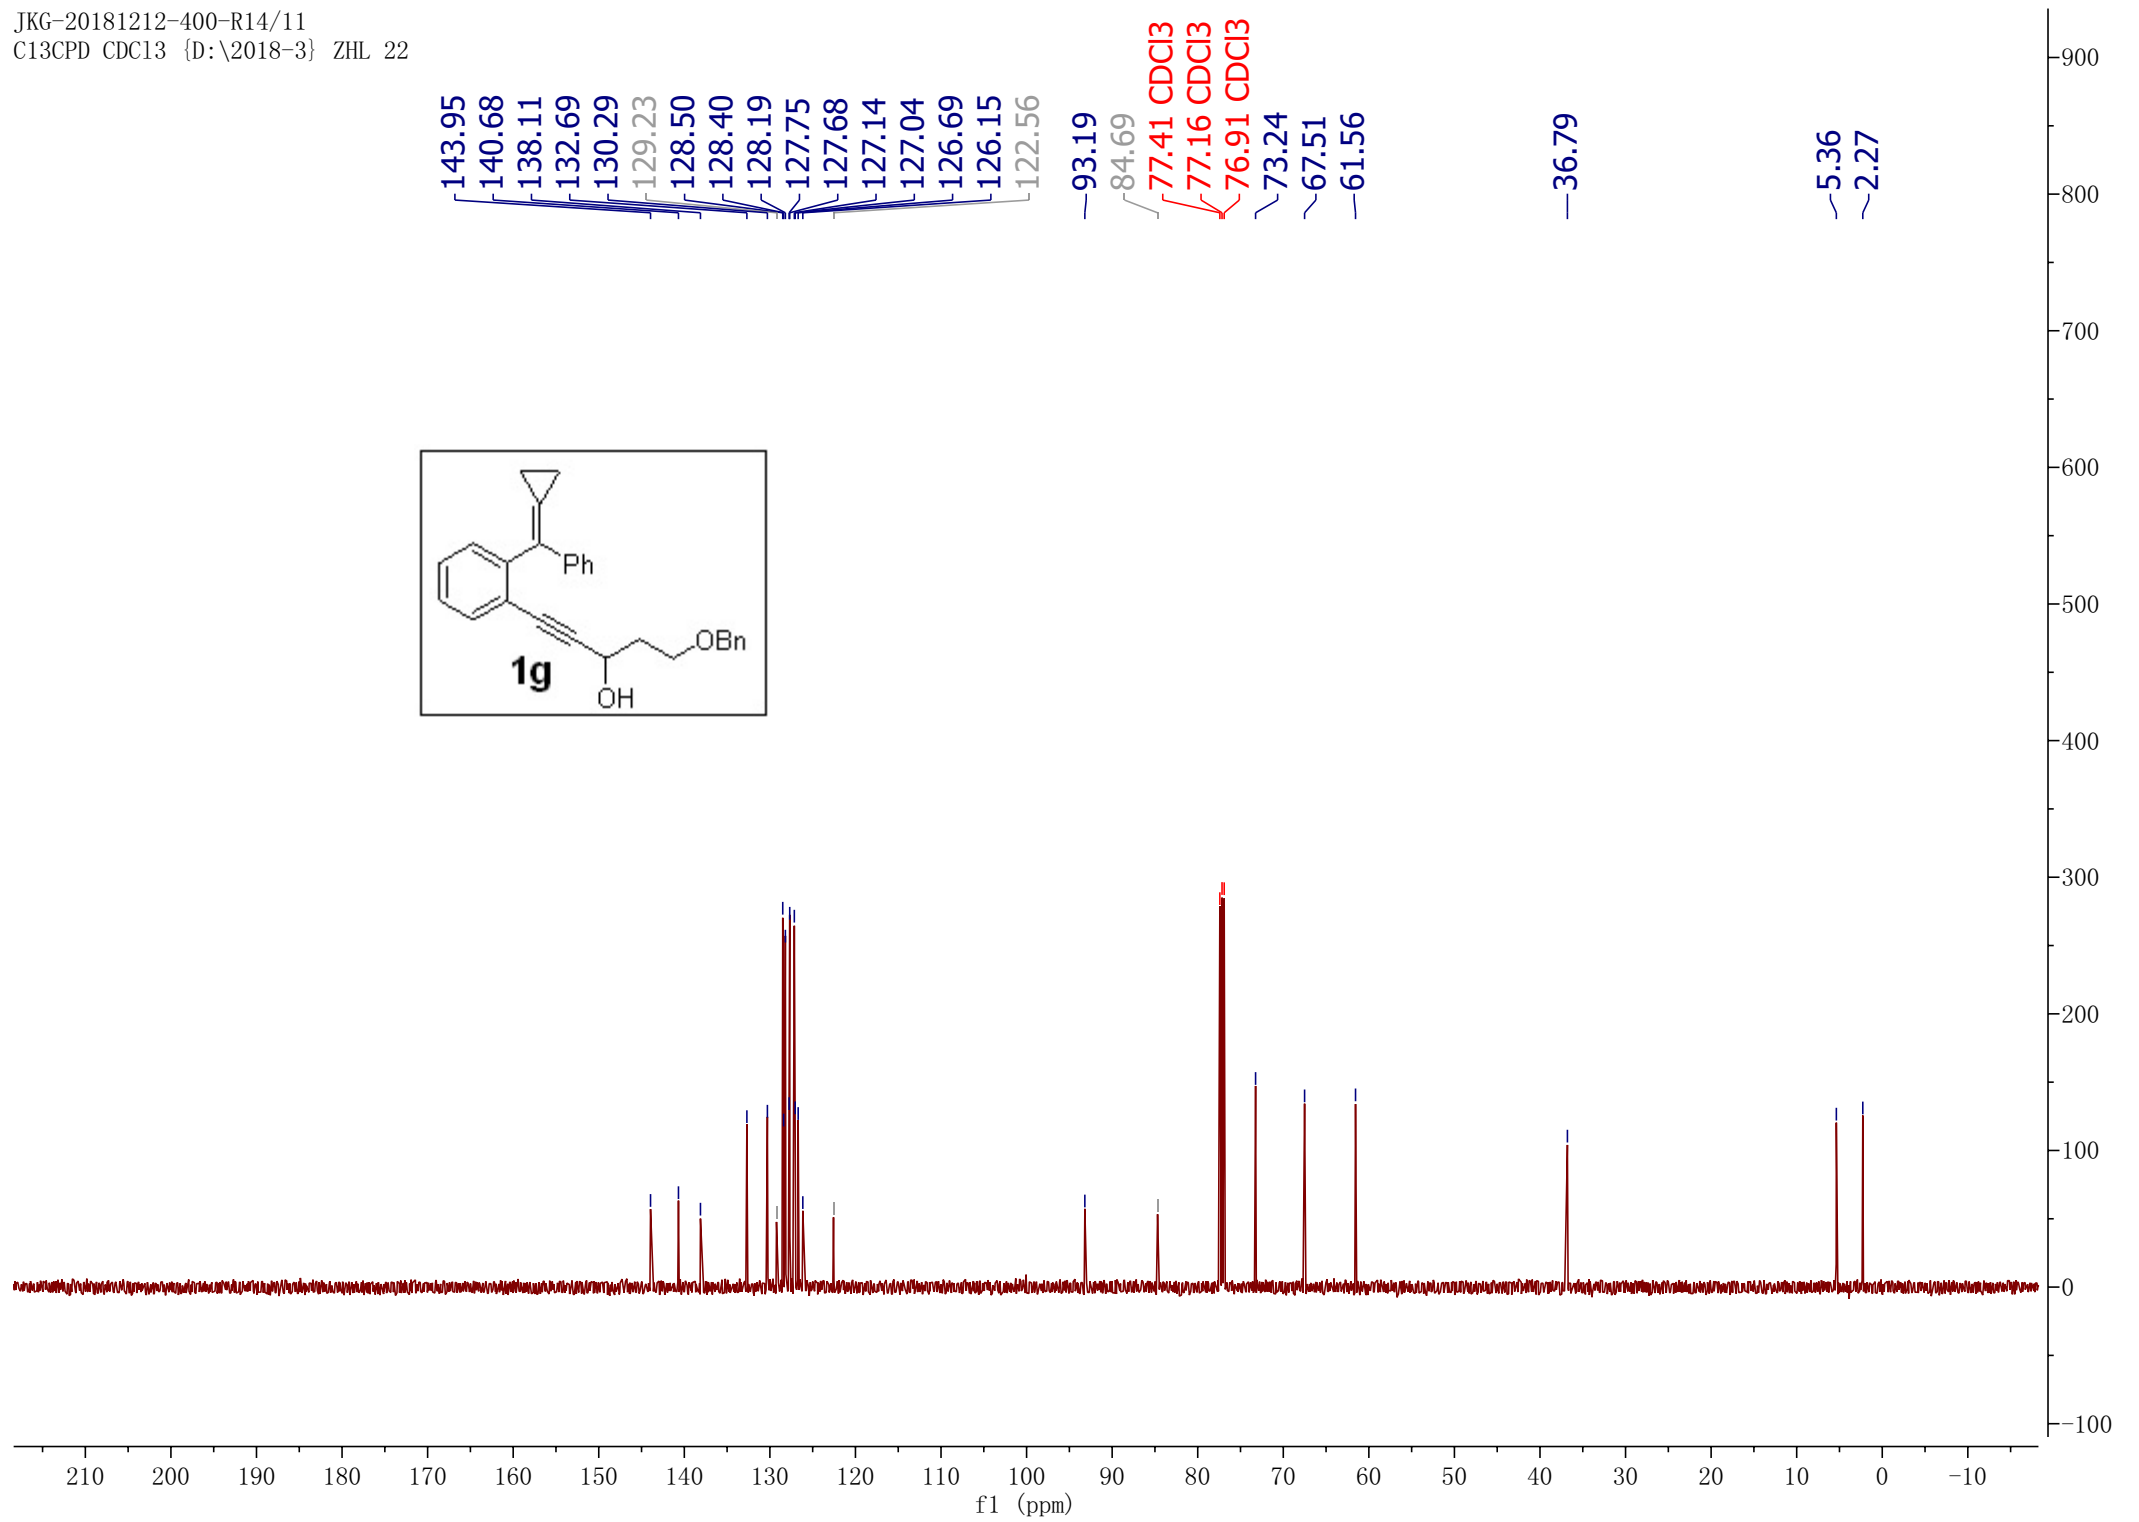



143.95  
140.72  
135.68  
134.92  
133.26  
133.23  
132.73  
130.38  
129.87  
129.84  
129.75  
129.32  
128.37  
128.11  
127.84  
127.14  
127.03  
126.60  
126.17  
122.55  
-93.71

84.72  
77.41 CDC13  
77.16 CDC13  
76.91 CDC13

61.60  
61.52

-39.04

-26.91

-19.18

-5.28  
-2.33

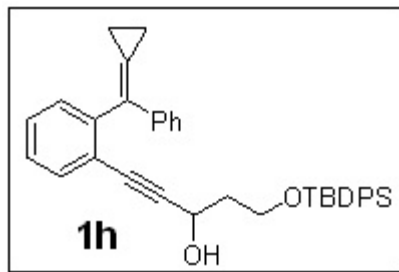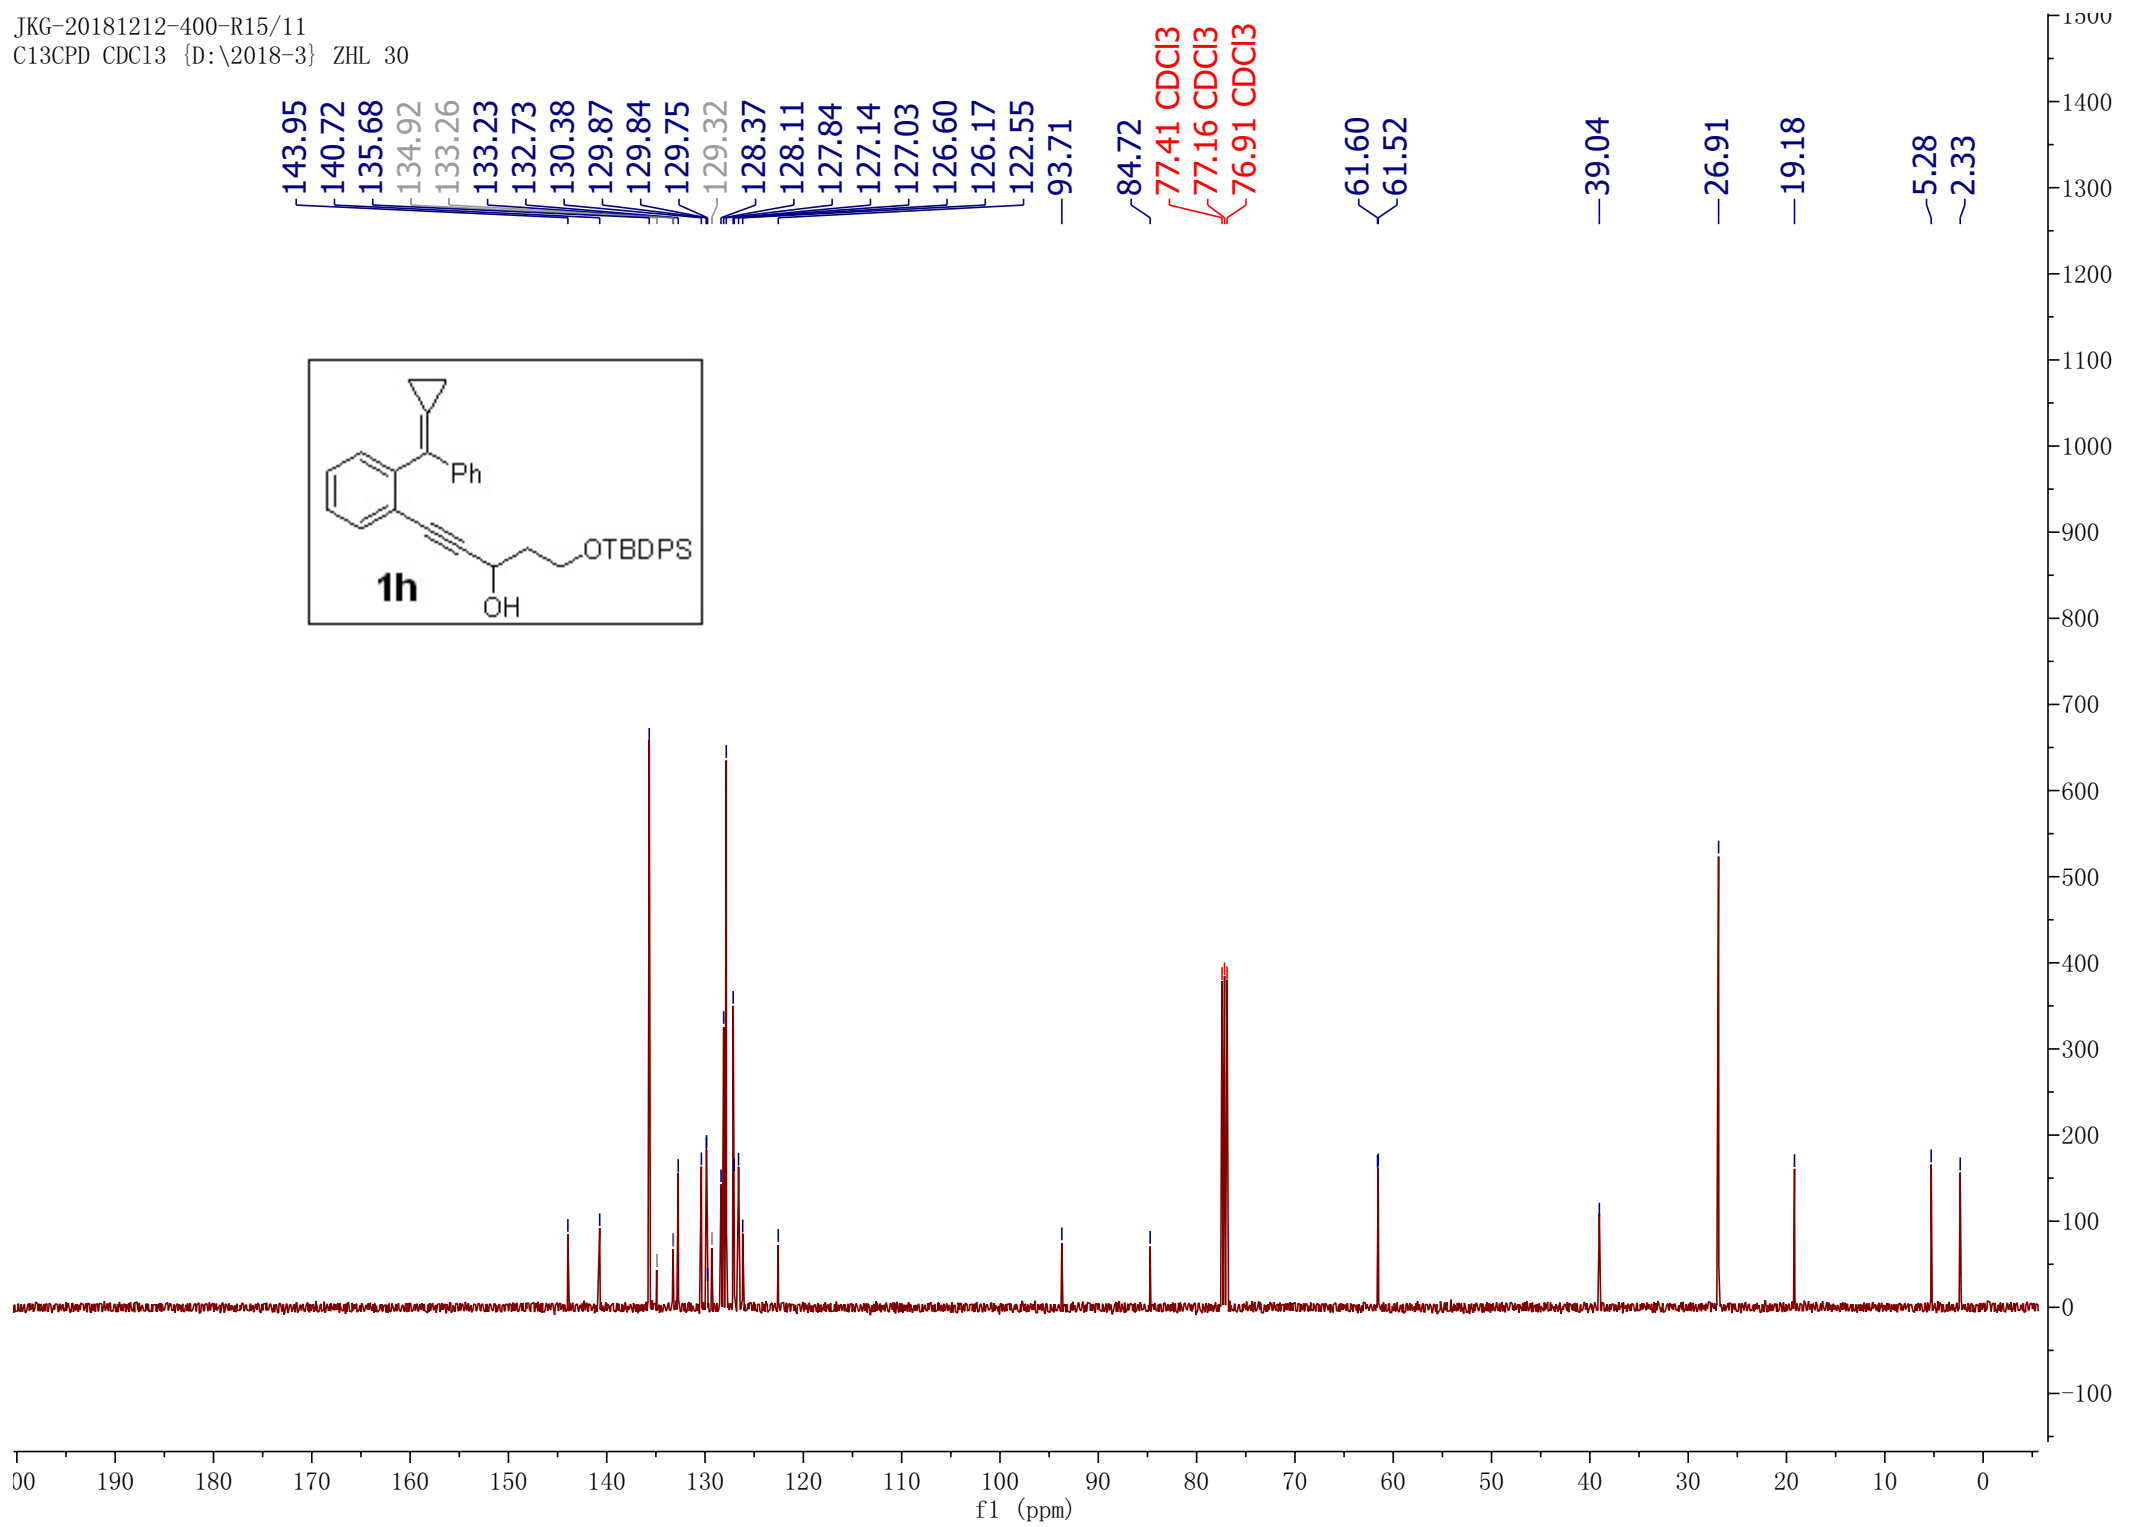



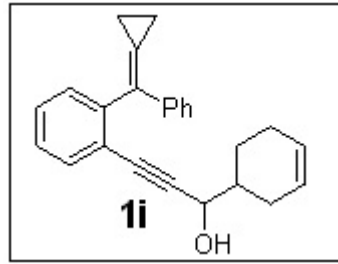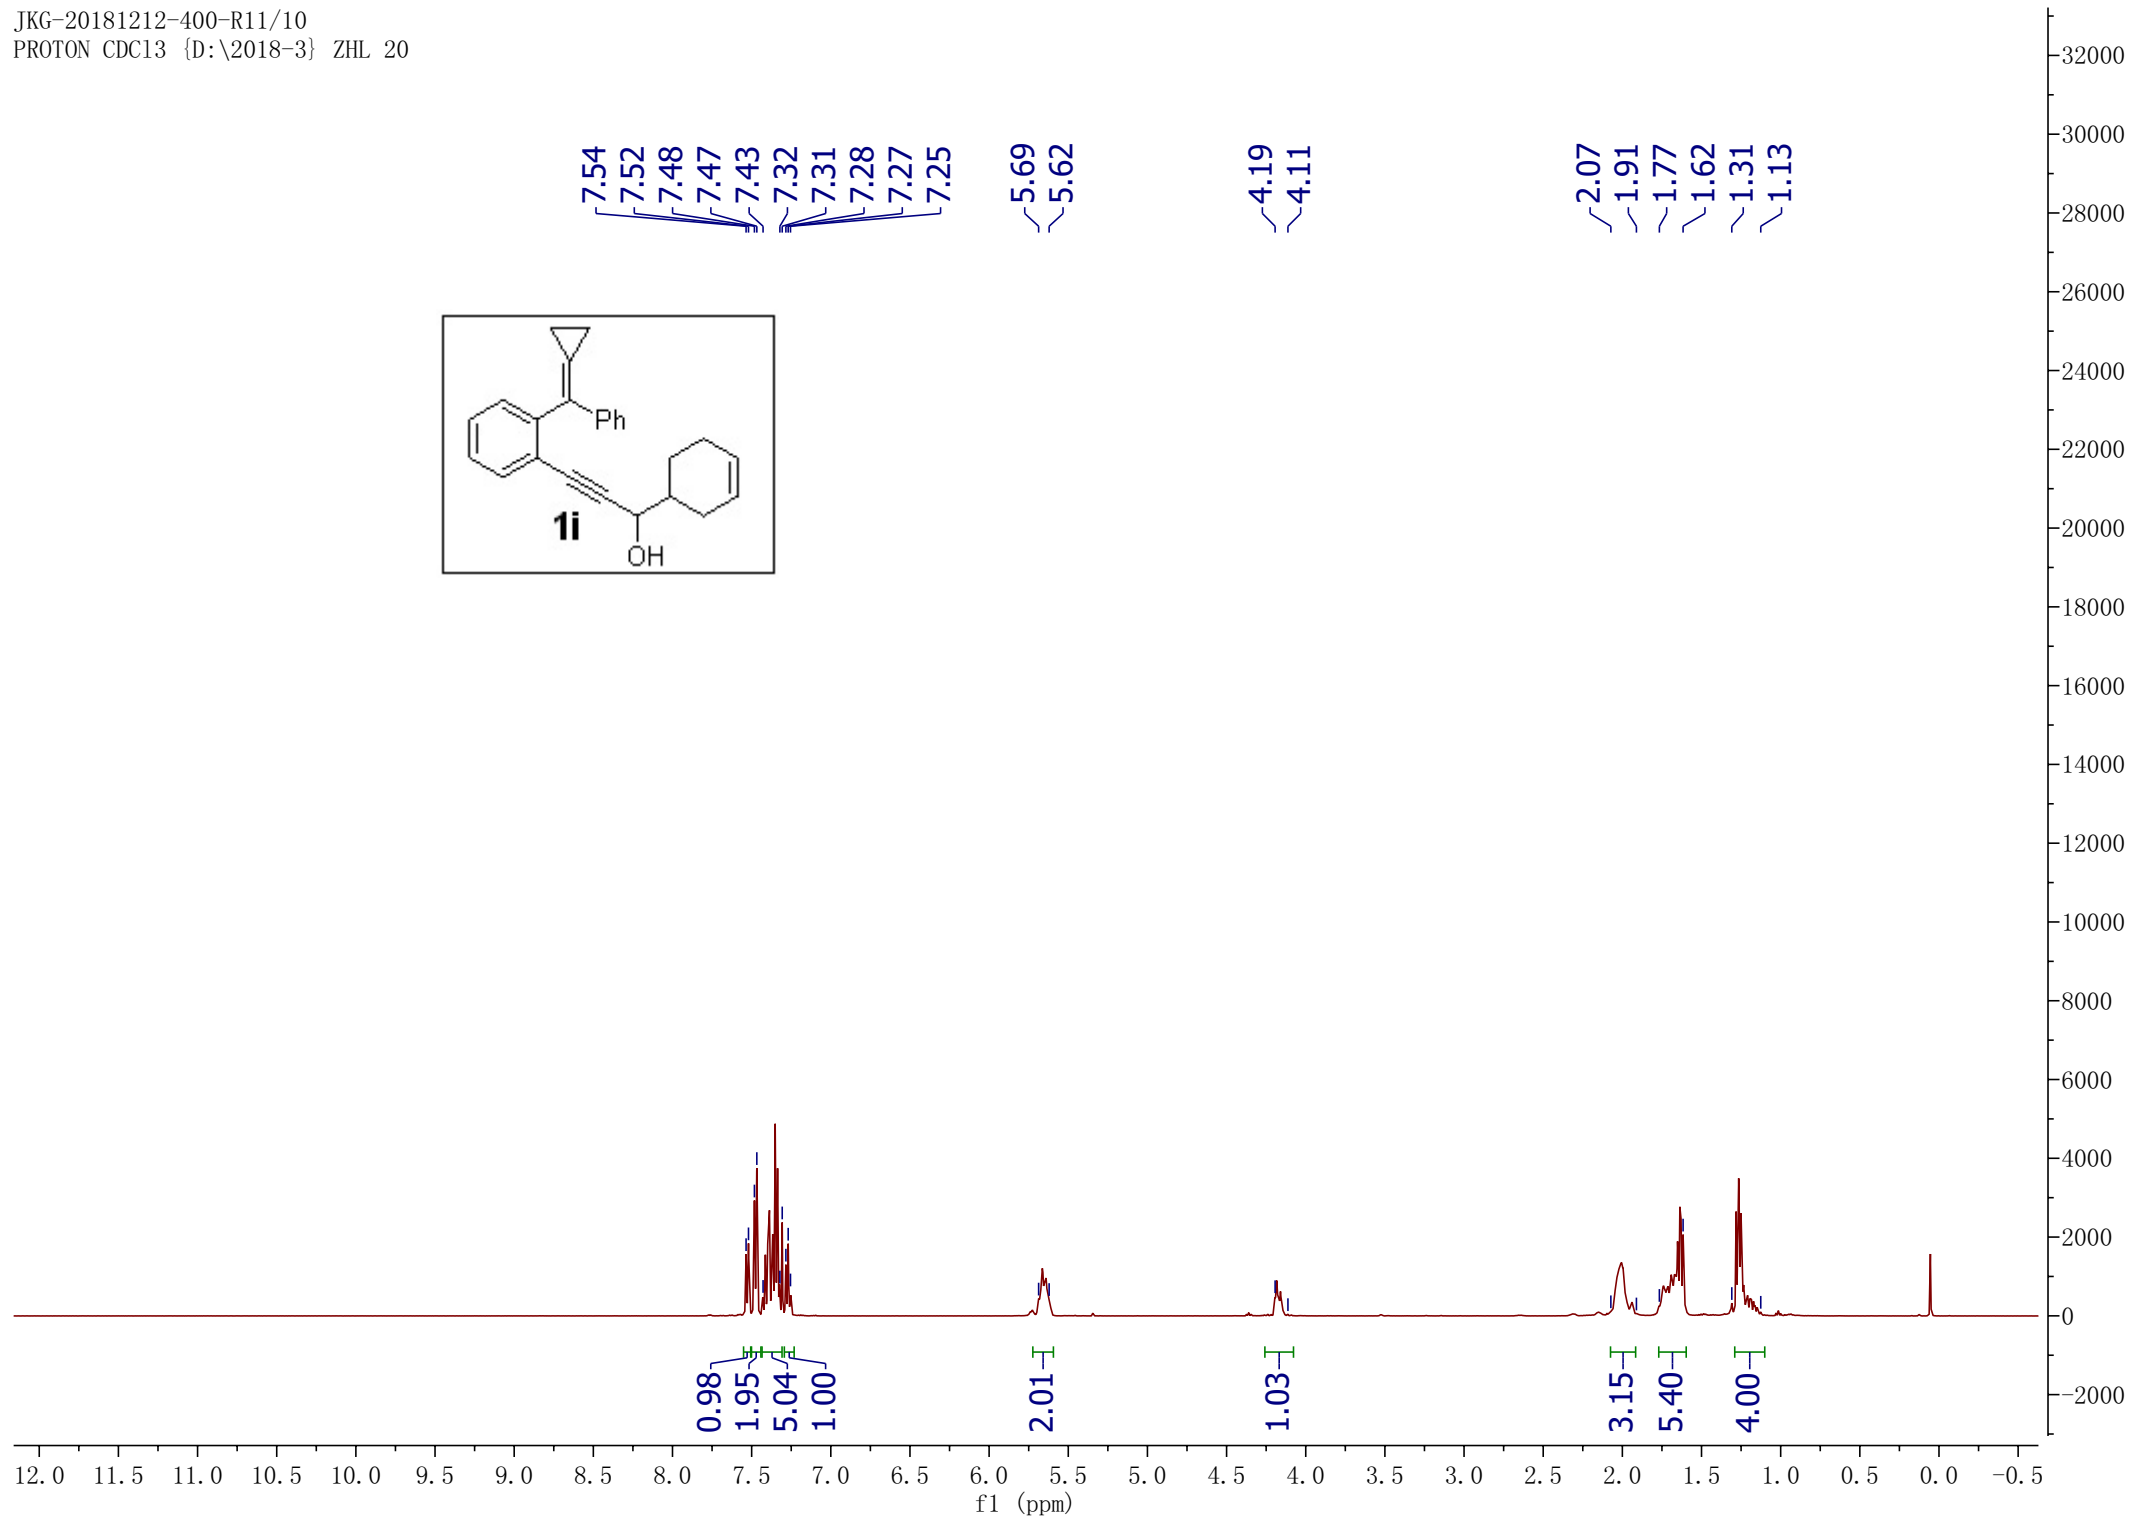

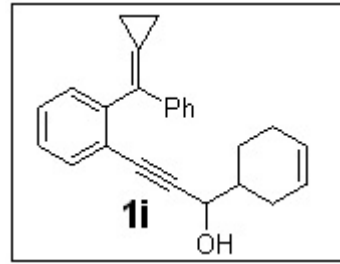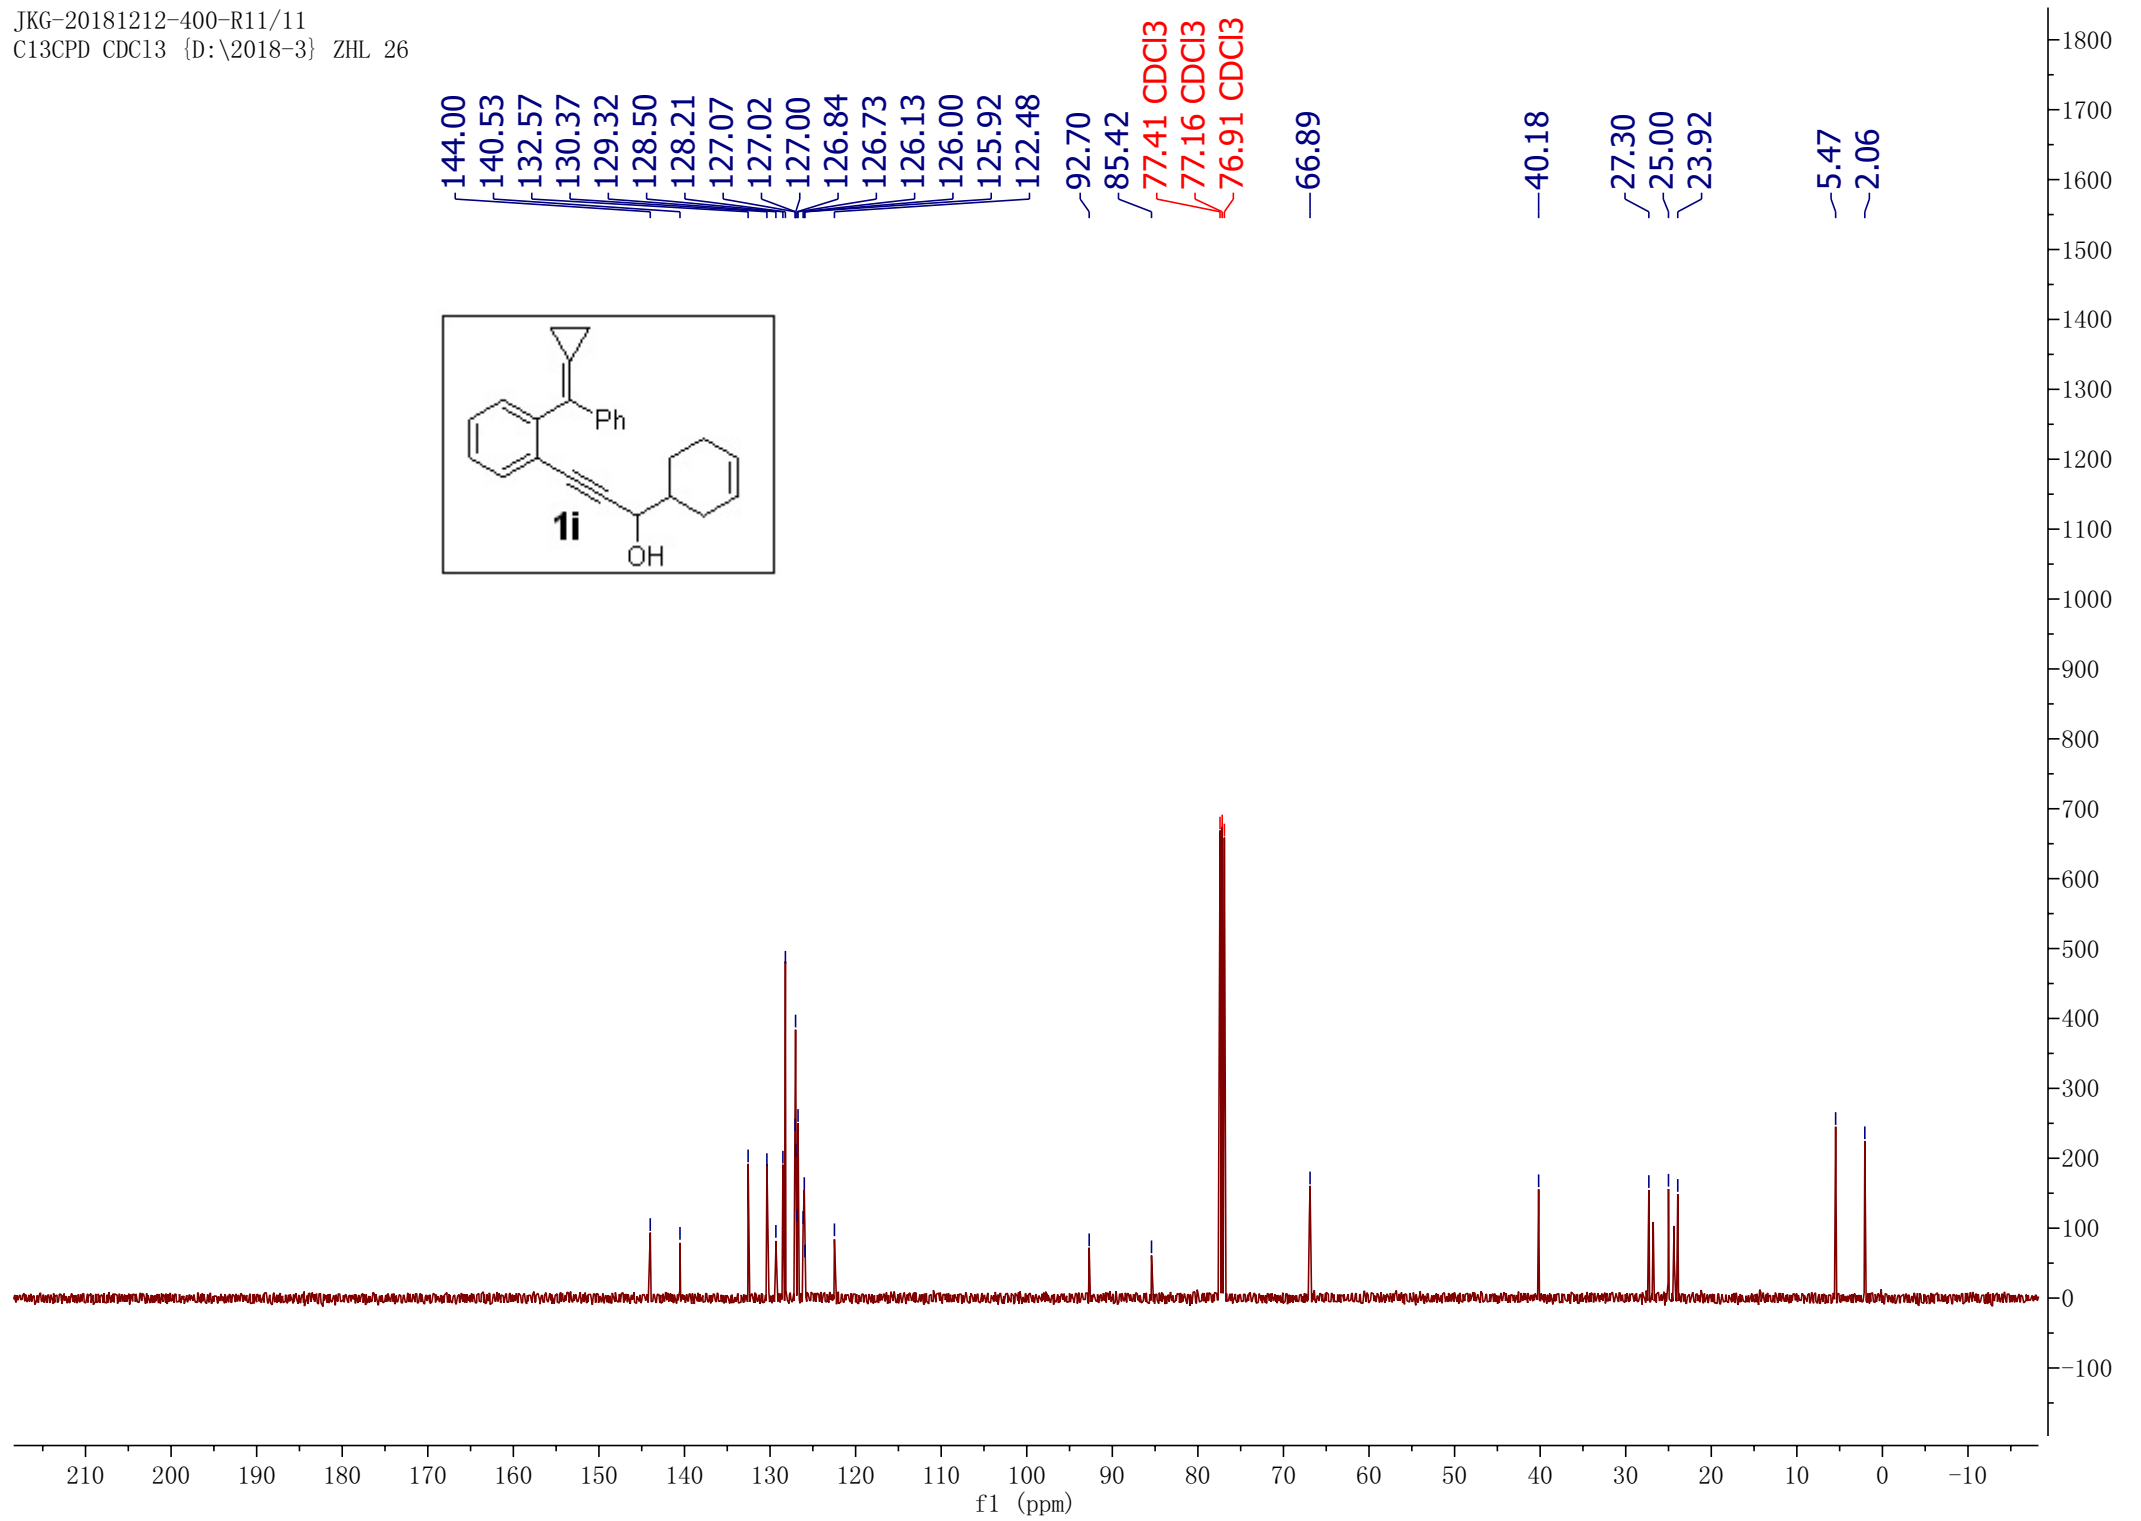

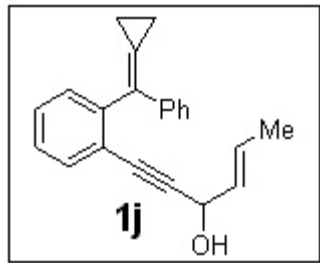

*E/Z* > 10:1

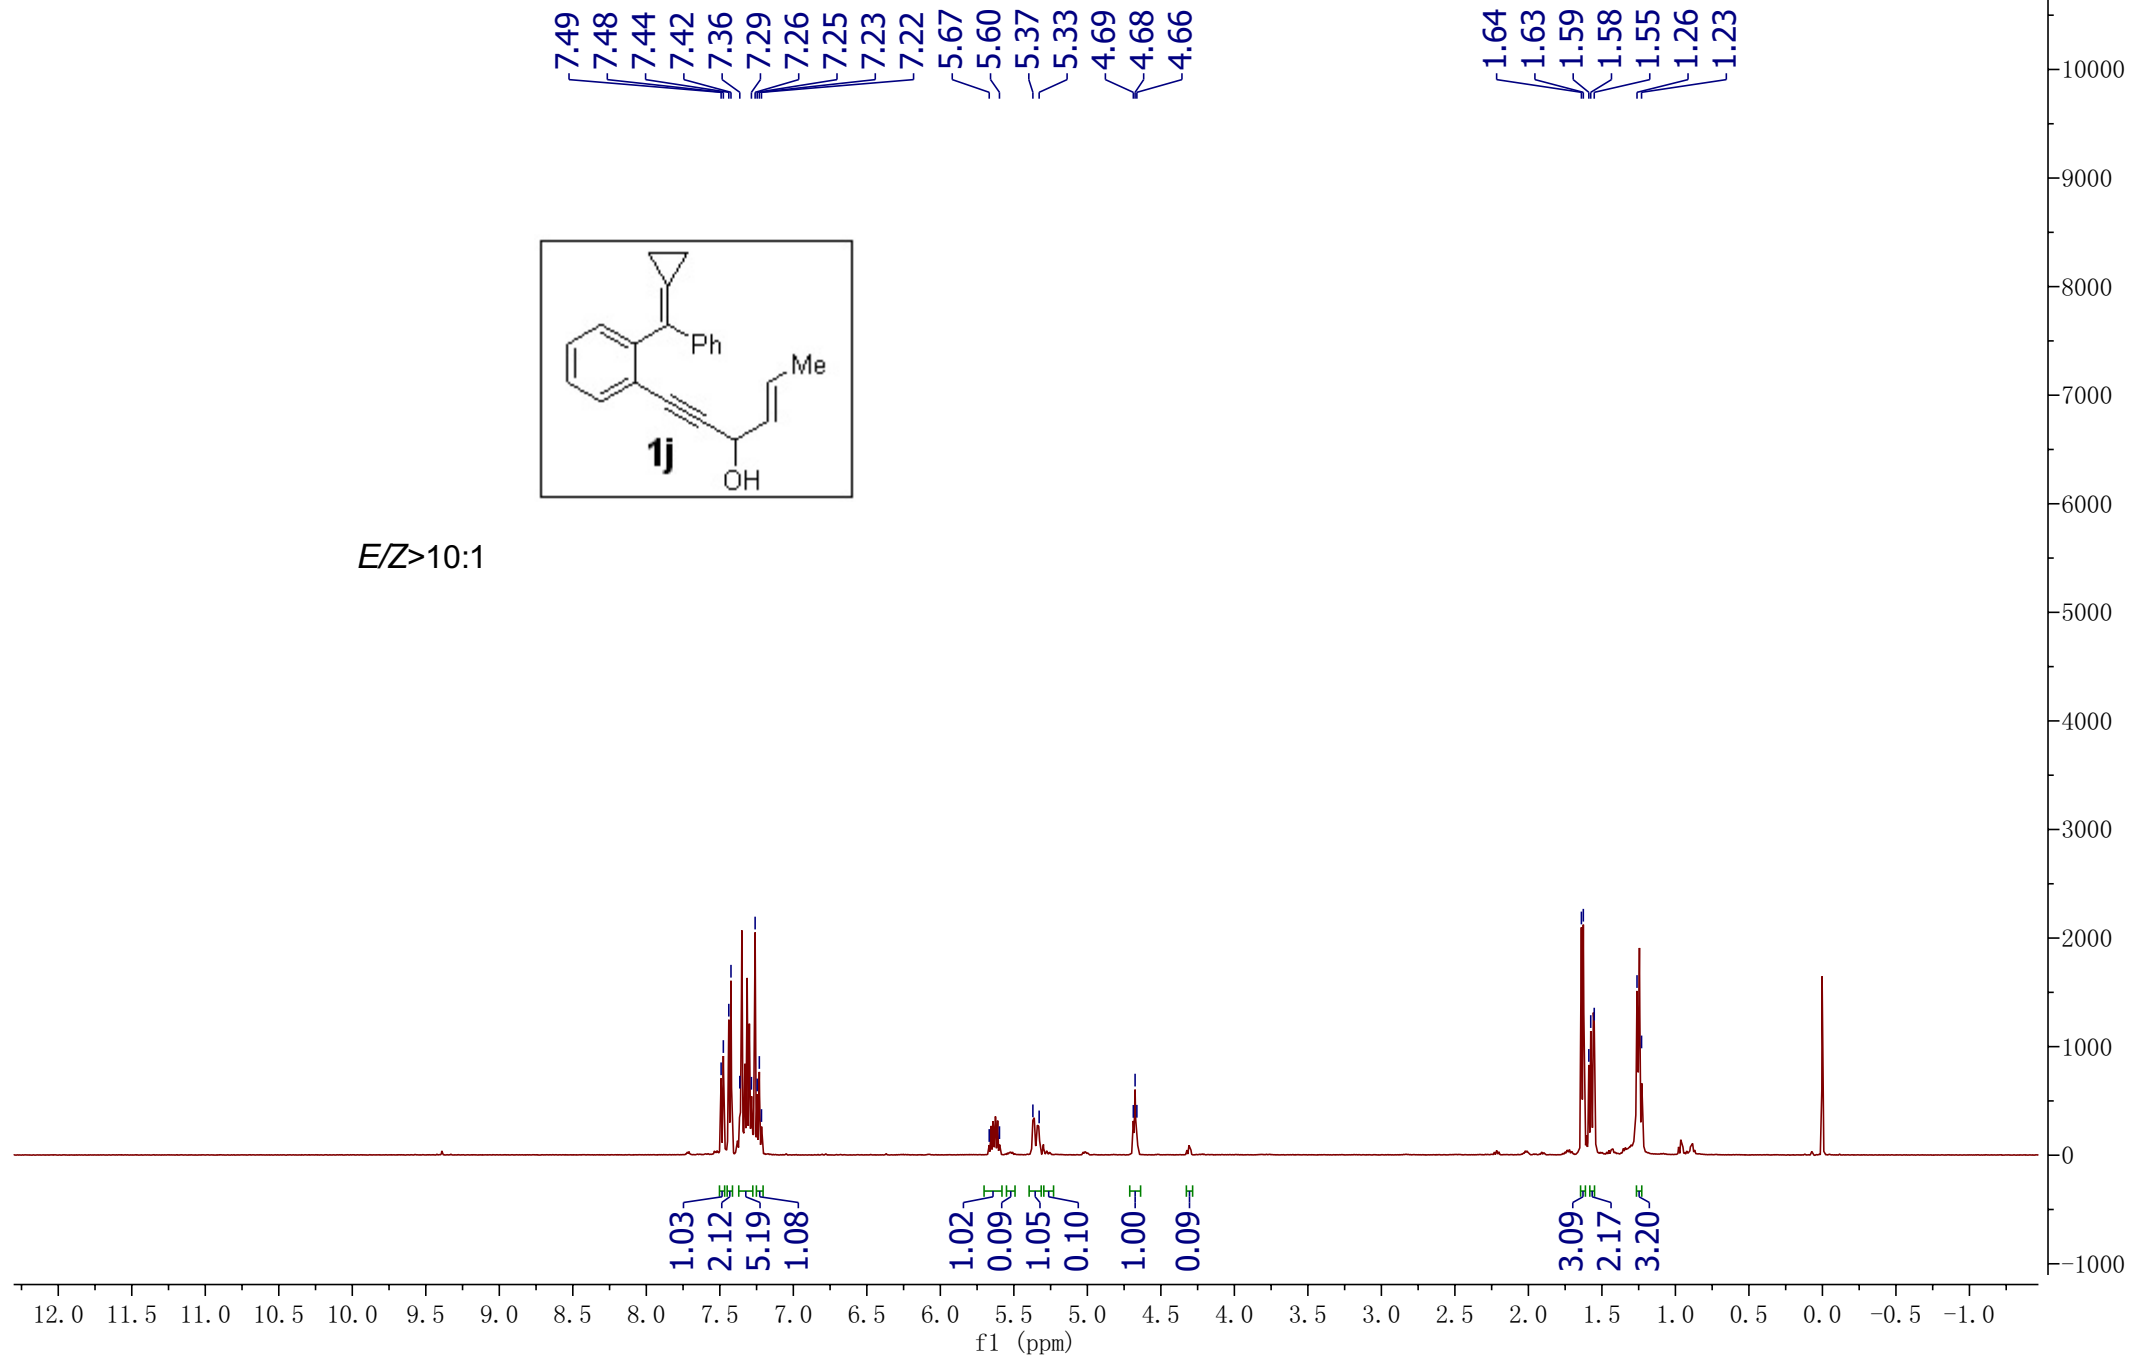

144.06  
140.87  
132.61  
130.38  
129.94  
129.28  
128.63  
128.55  
128.19  
127.24  
127.07  
126.69  
126.38  
122.33

92.35  
85.79  
77.41 CDC13  
77.16 CDC13  
76.91 CDC13

63.24

17.61

5.30  
2.36

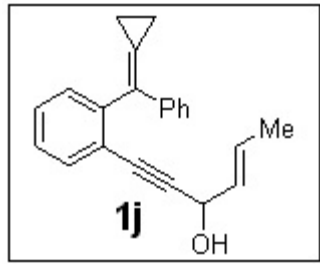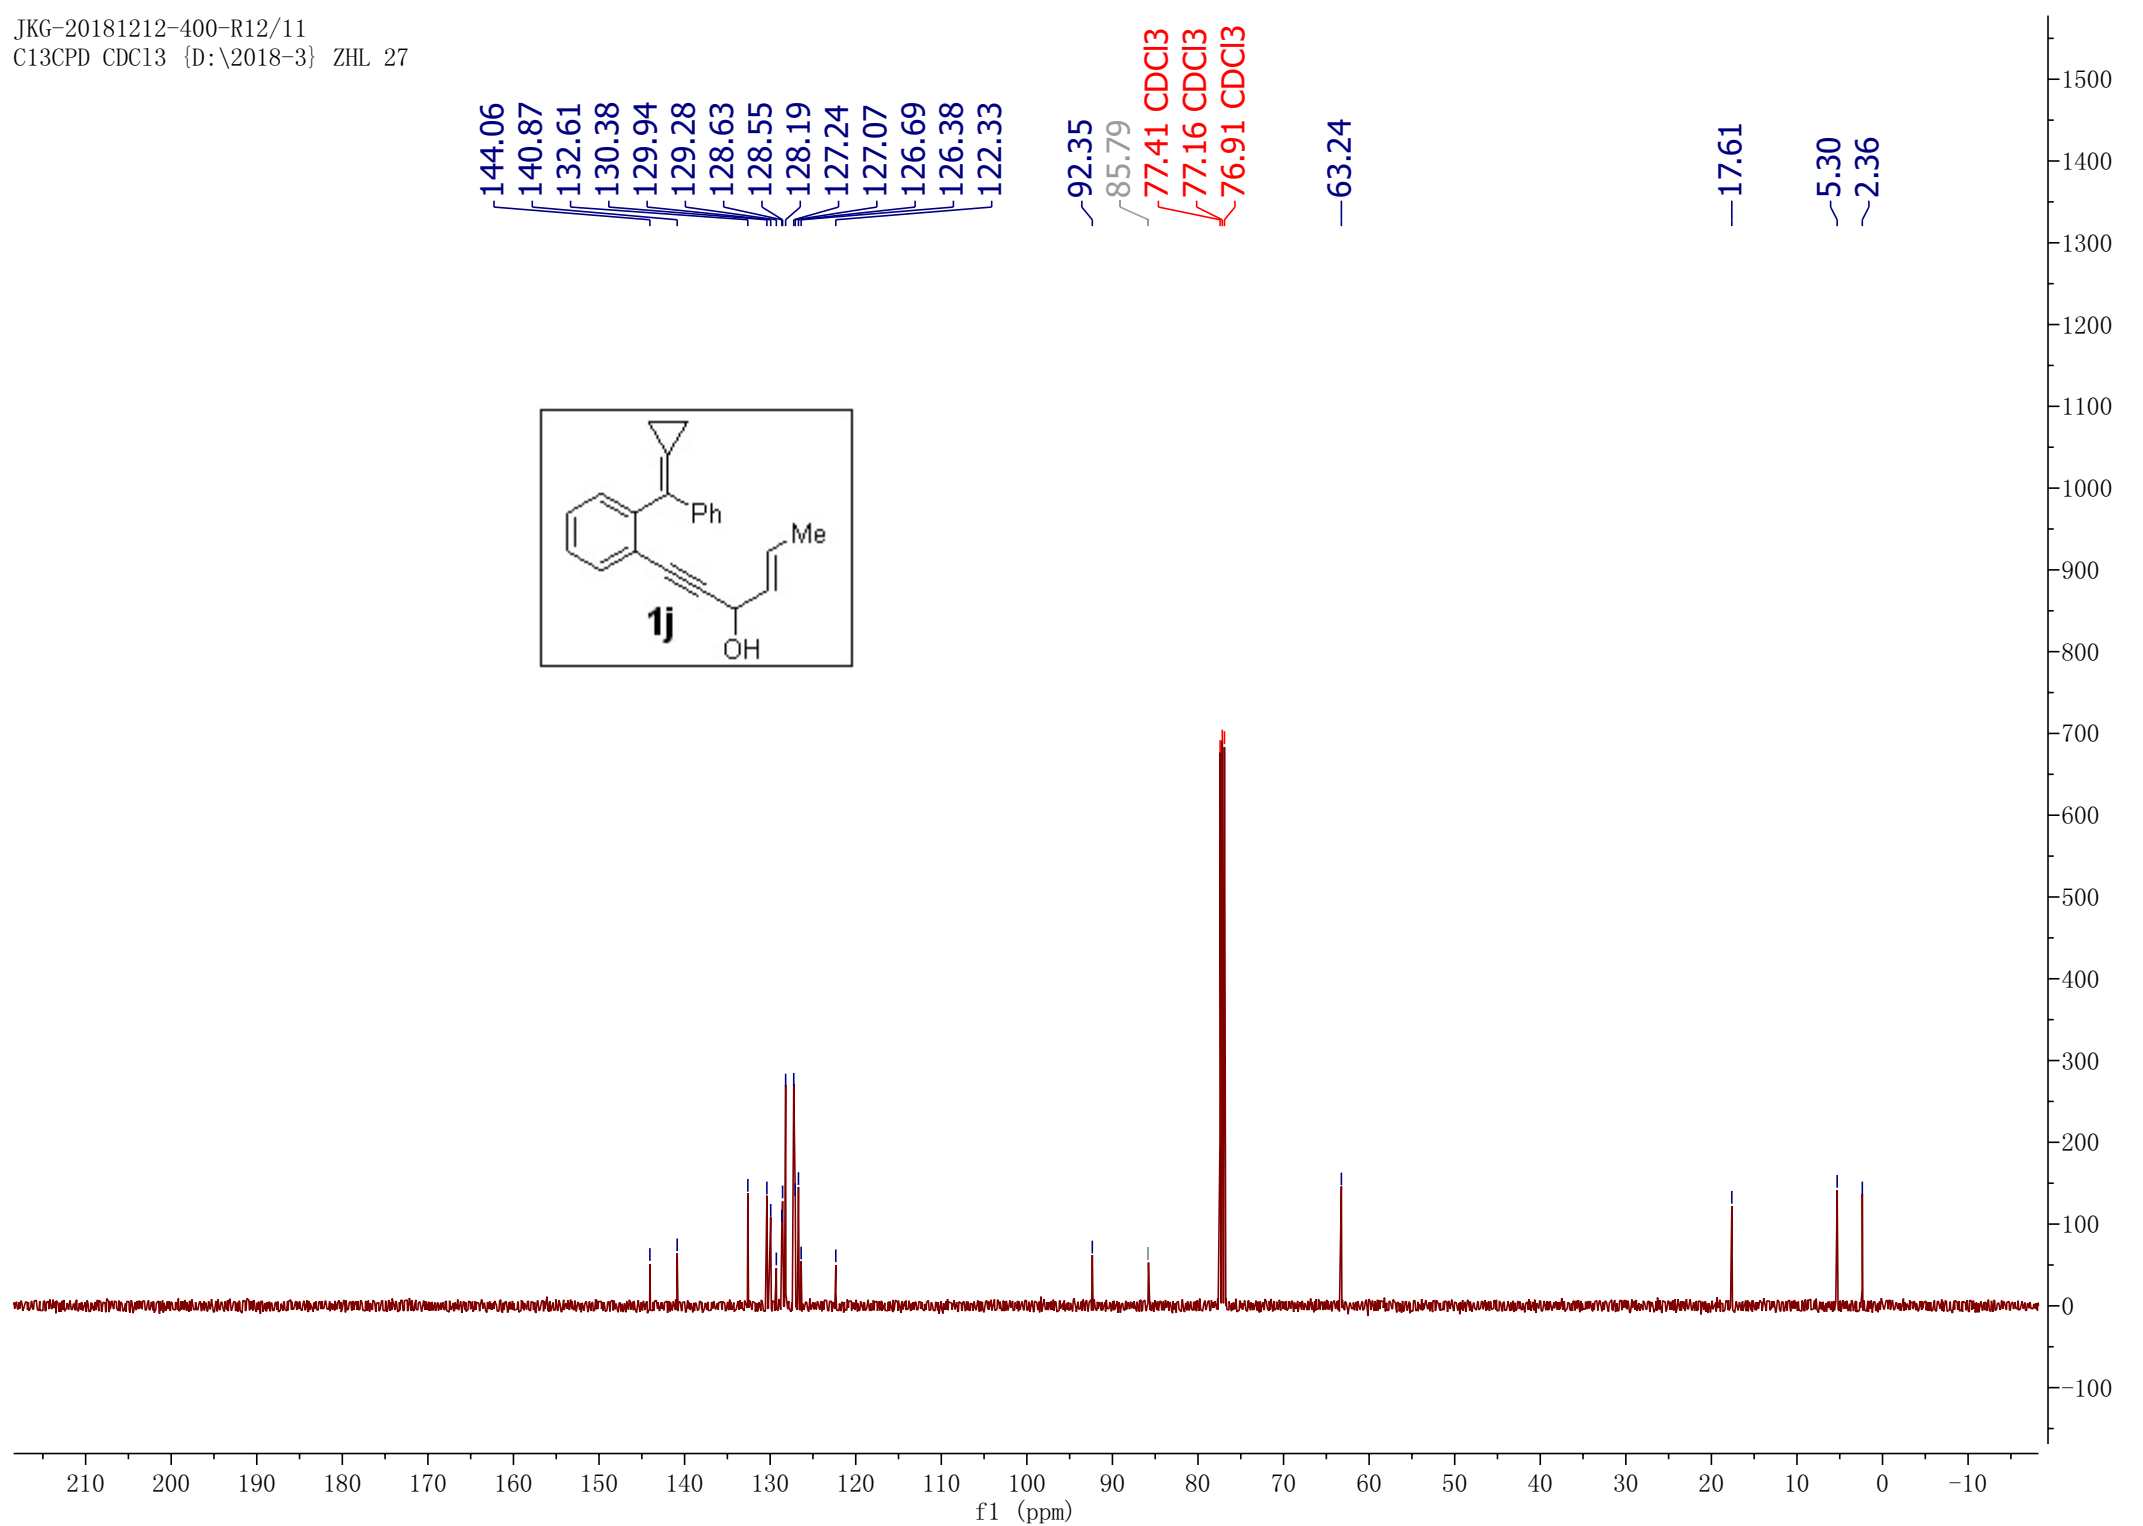

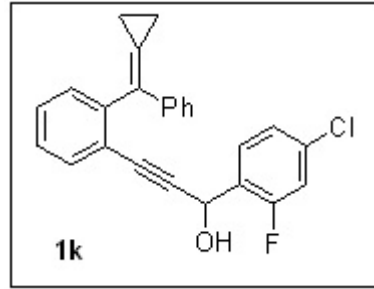

7.52  
7.50  
7.43  
7.42  
7.40  
7.35  
7.33  
7.29  
7.26  
7.24  
7.21  
7.20  
7.17  
6.96  
6.95  
6.93  
5.62  
5.61

1.83  
1.82  
1.59  
1.57  
1.50  
1.22  
1.21  
1.19

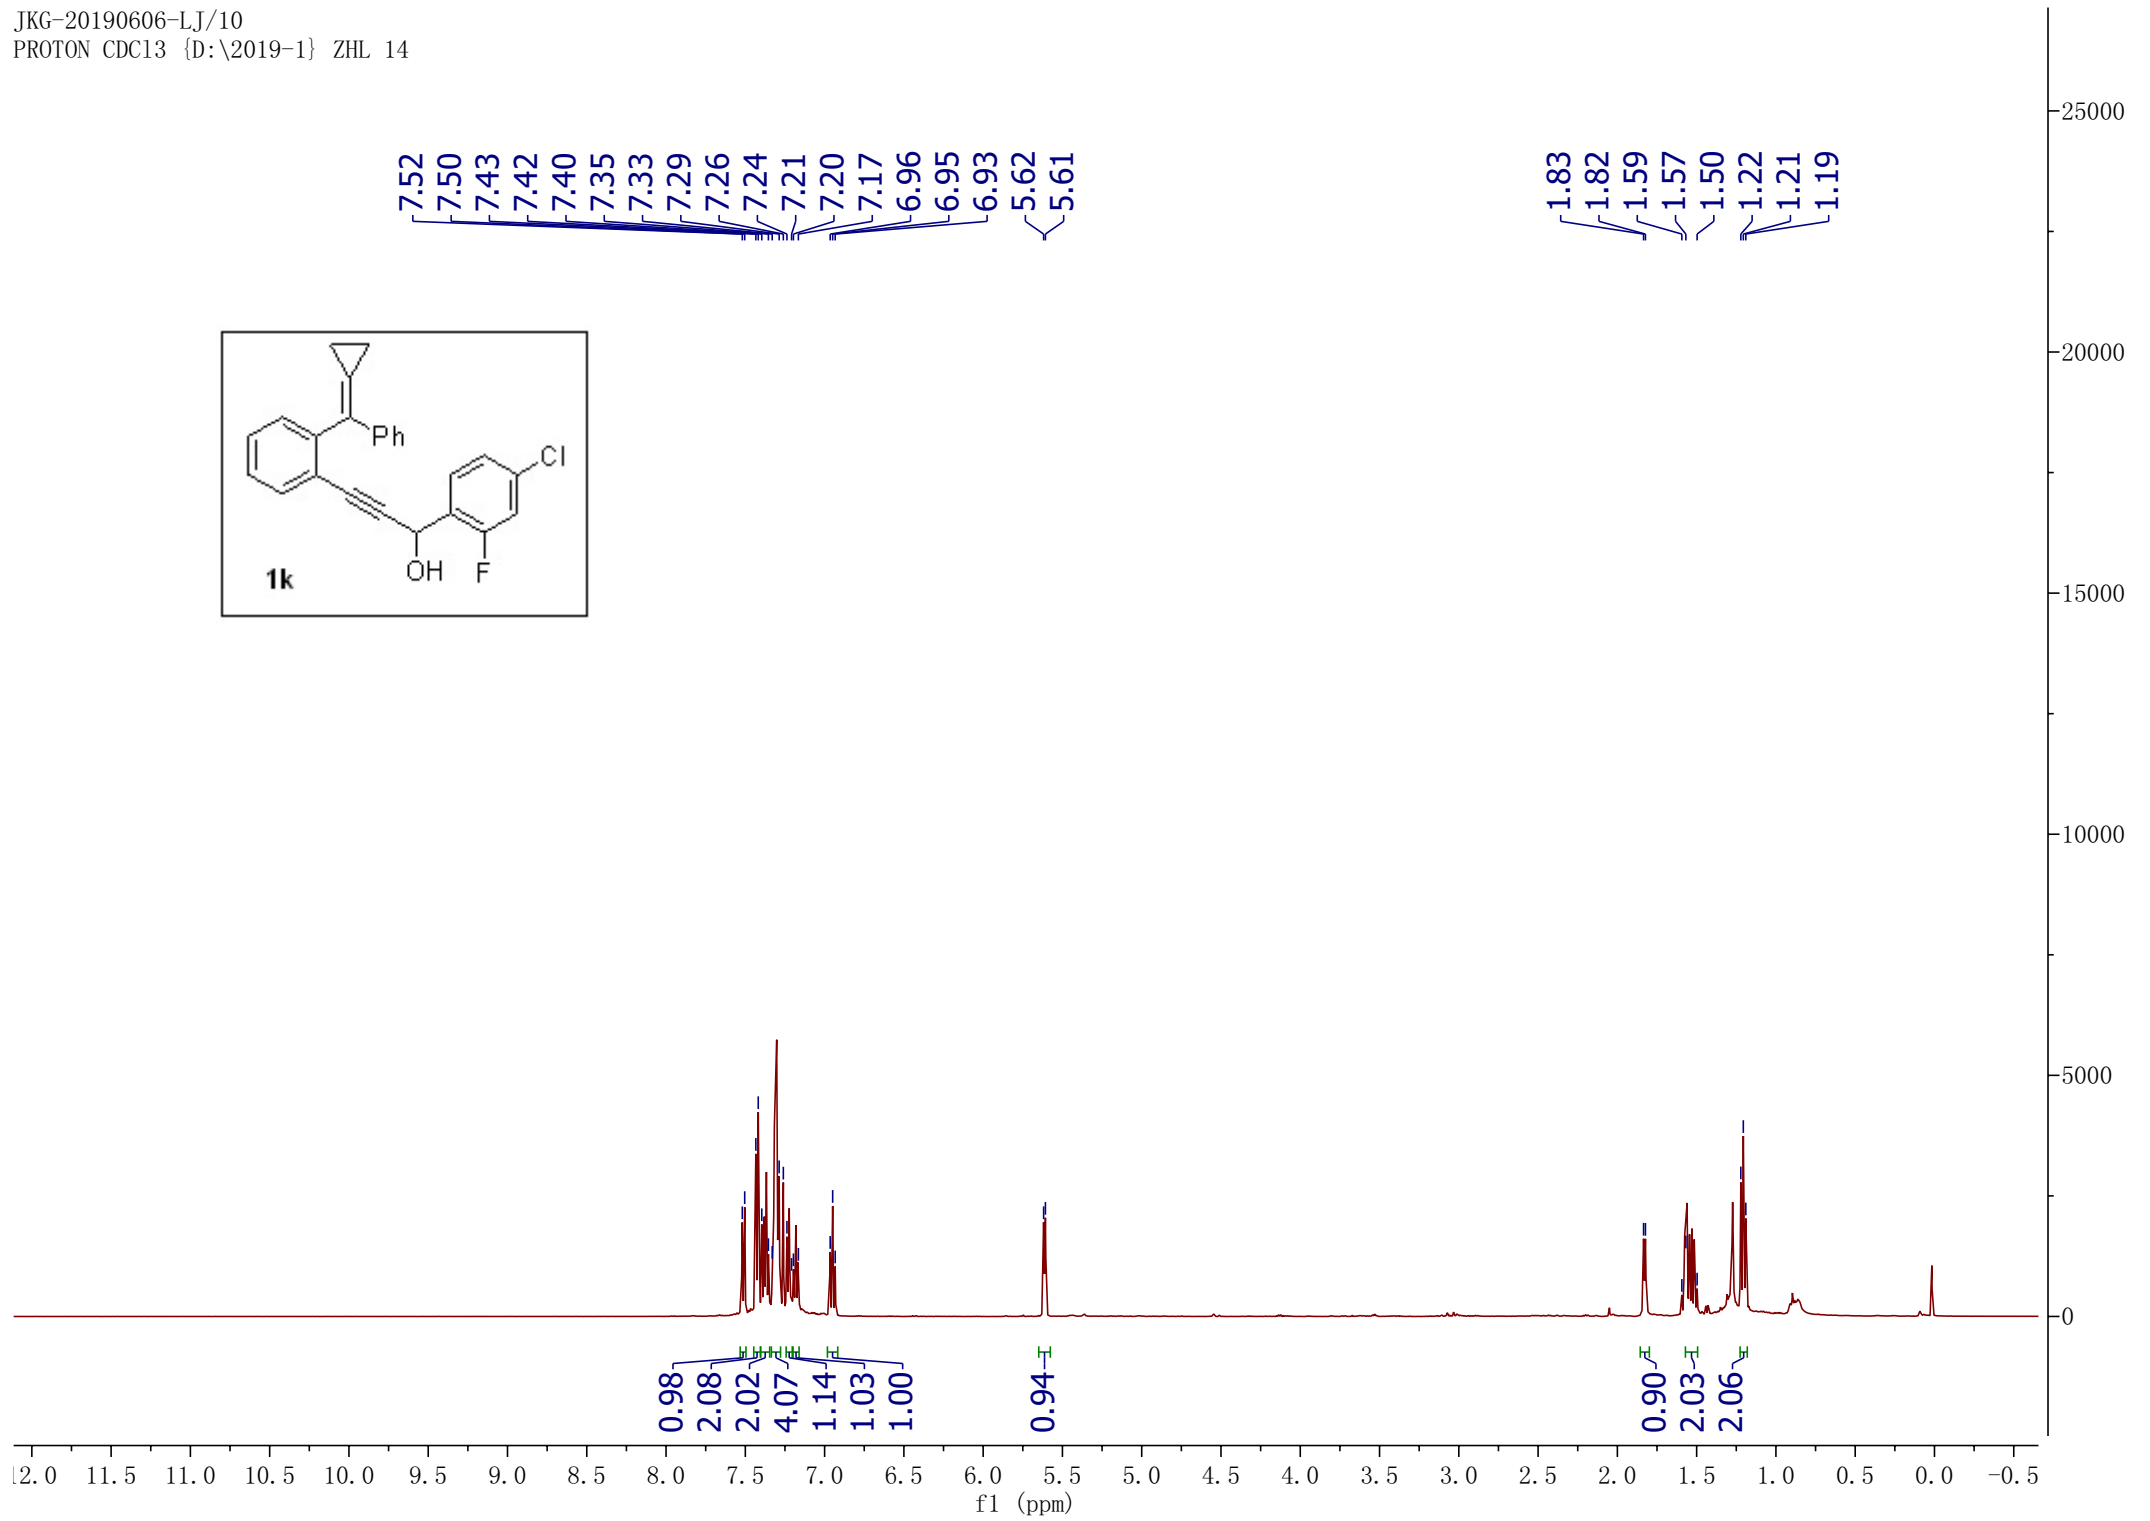

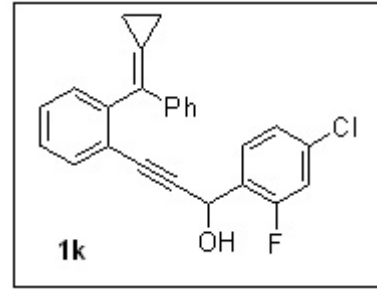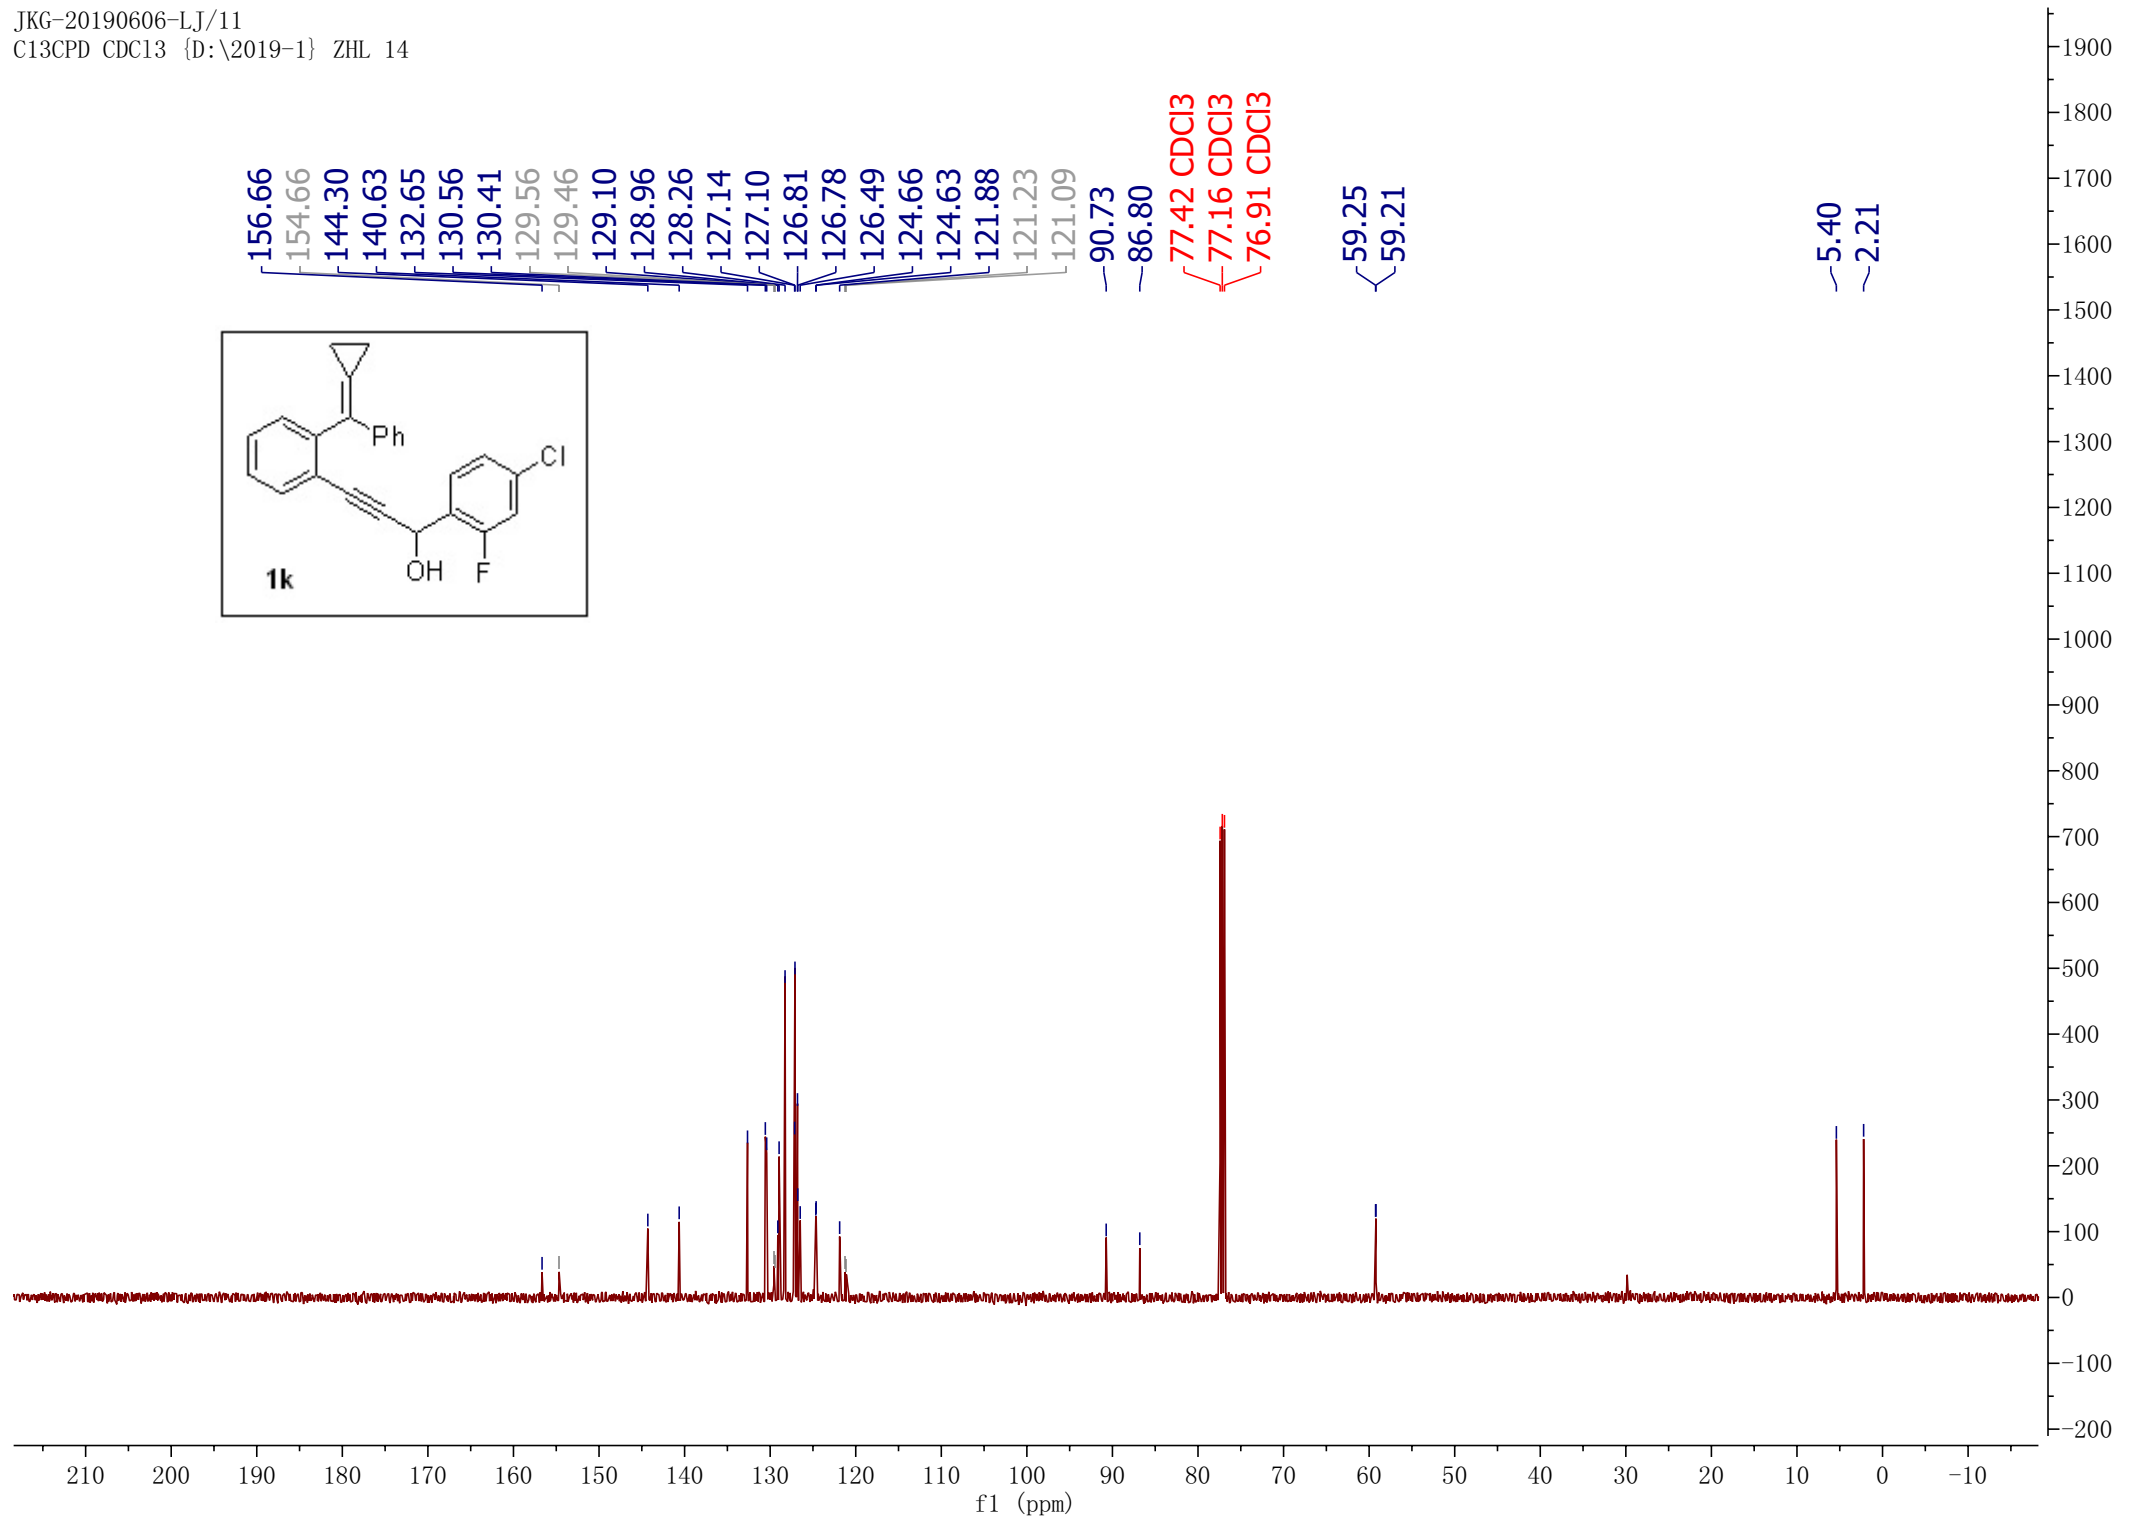

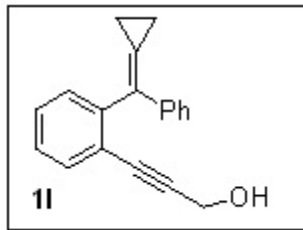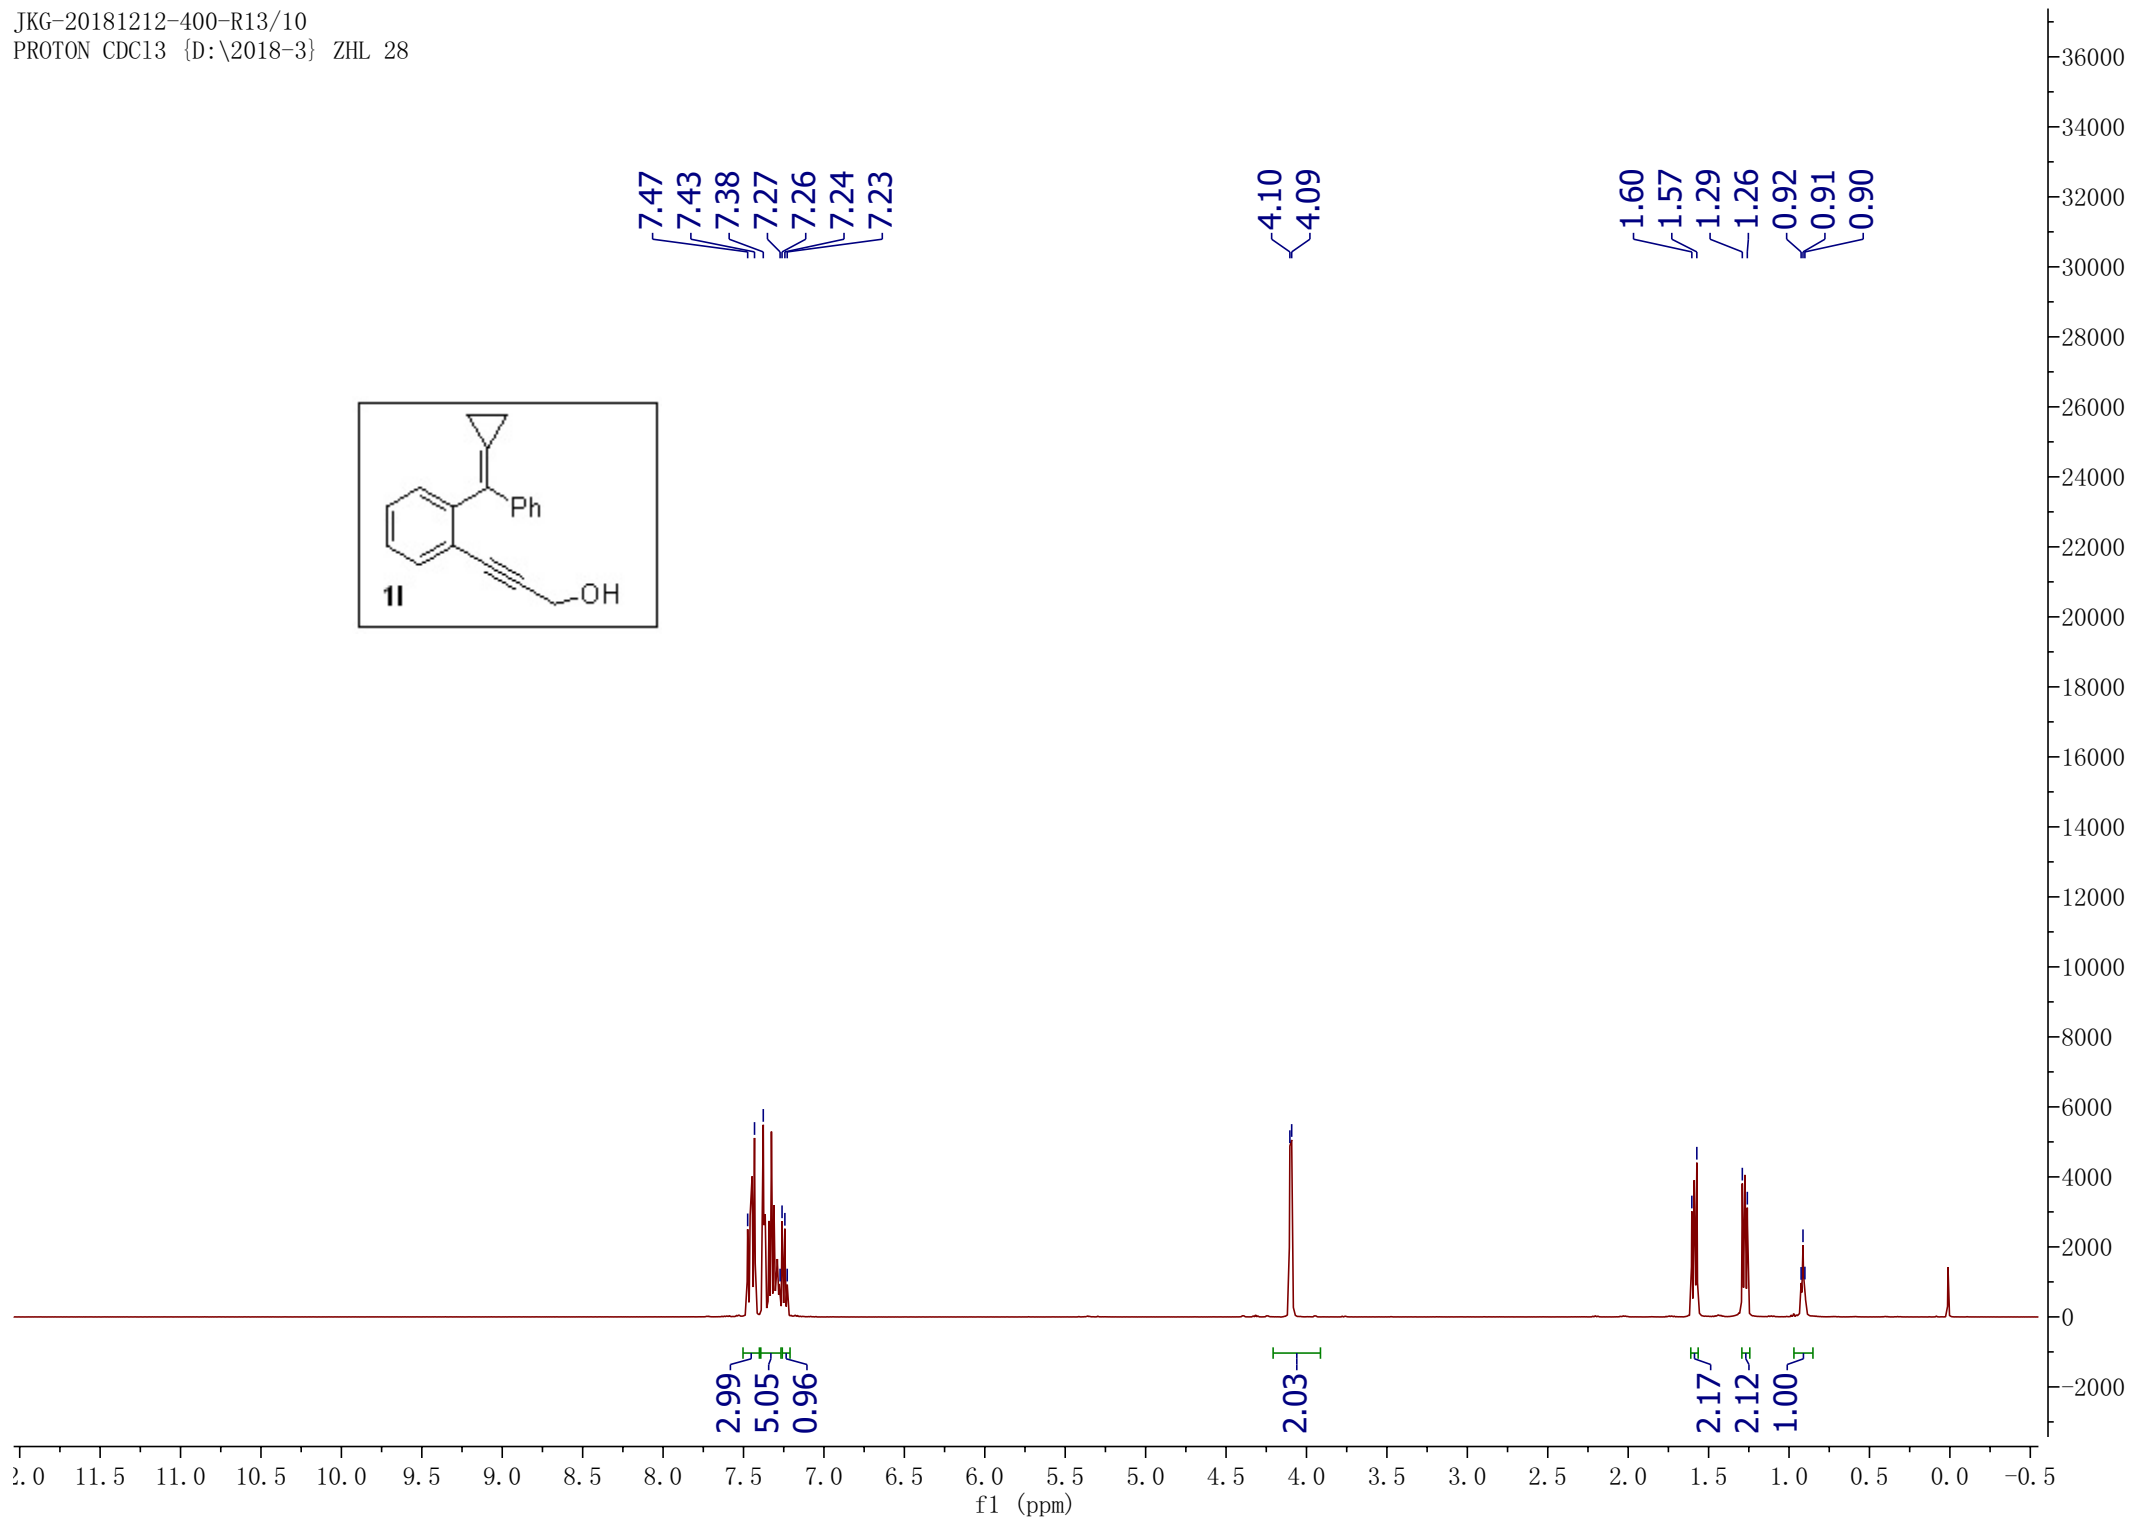

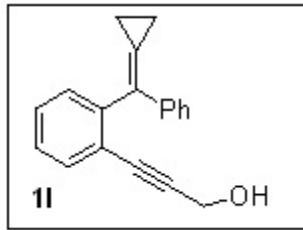

144.06  
141.13  
132.54  
130.41  
129.34  
128.55  
128.17  
127.35  
127.10  
126.66  
126.60  
122.27

91.35

85.72

77.41 CDC13

77.16 CDC13

76.91 CDC13

51.52

5.20

2.53

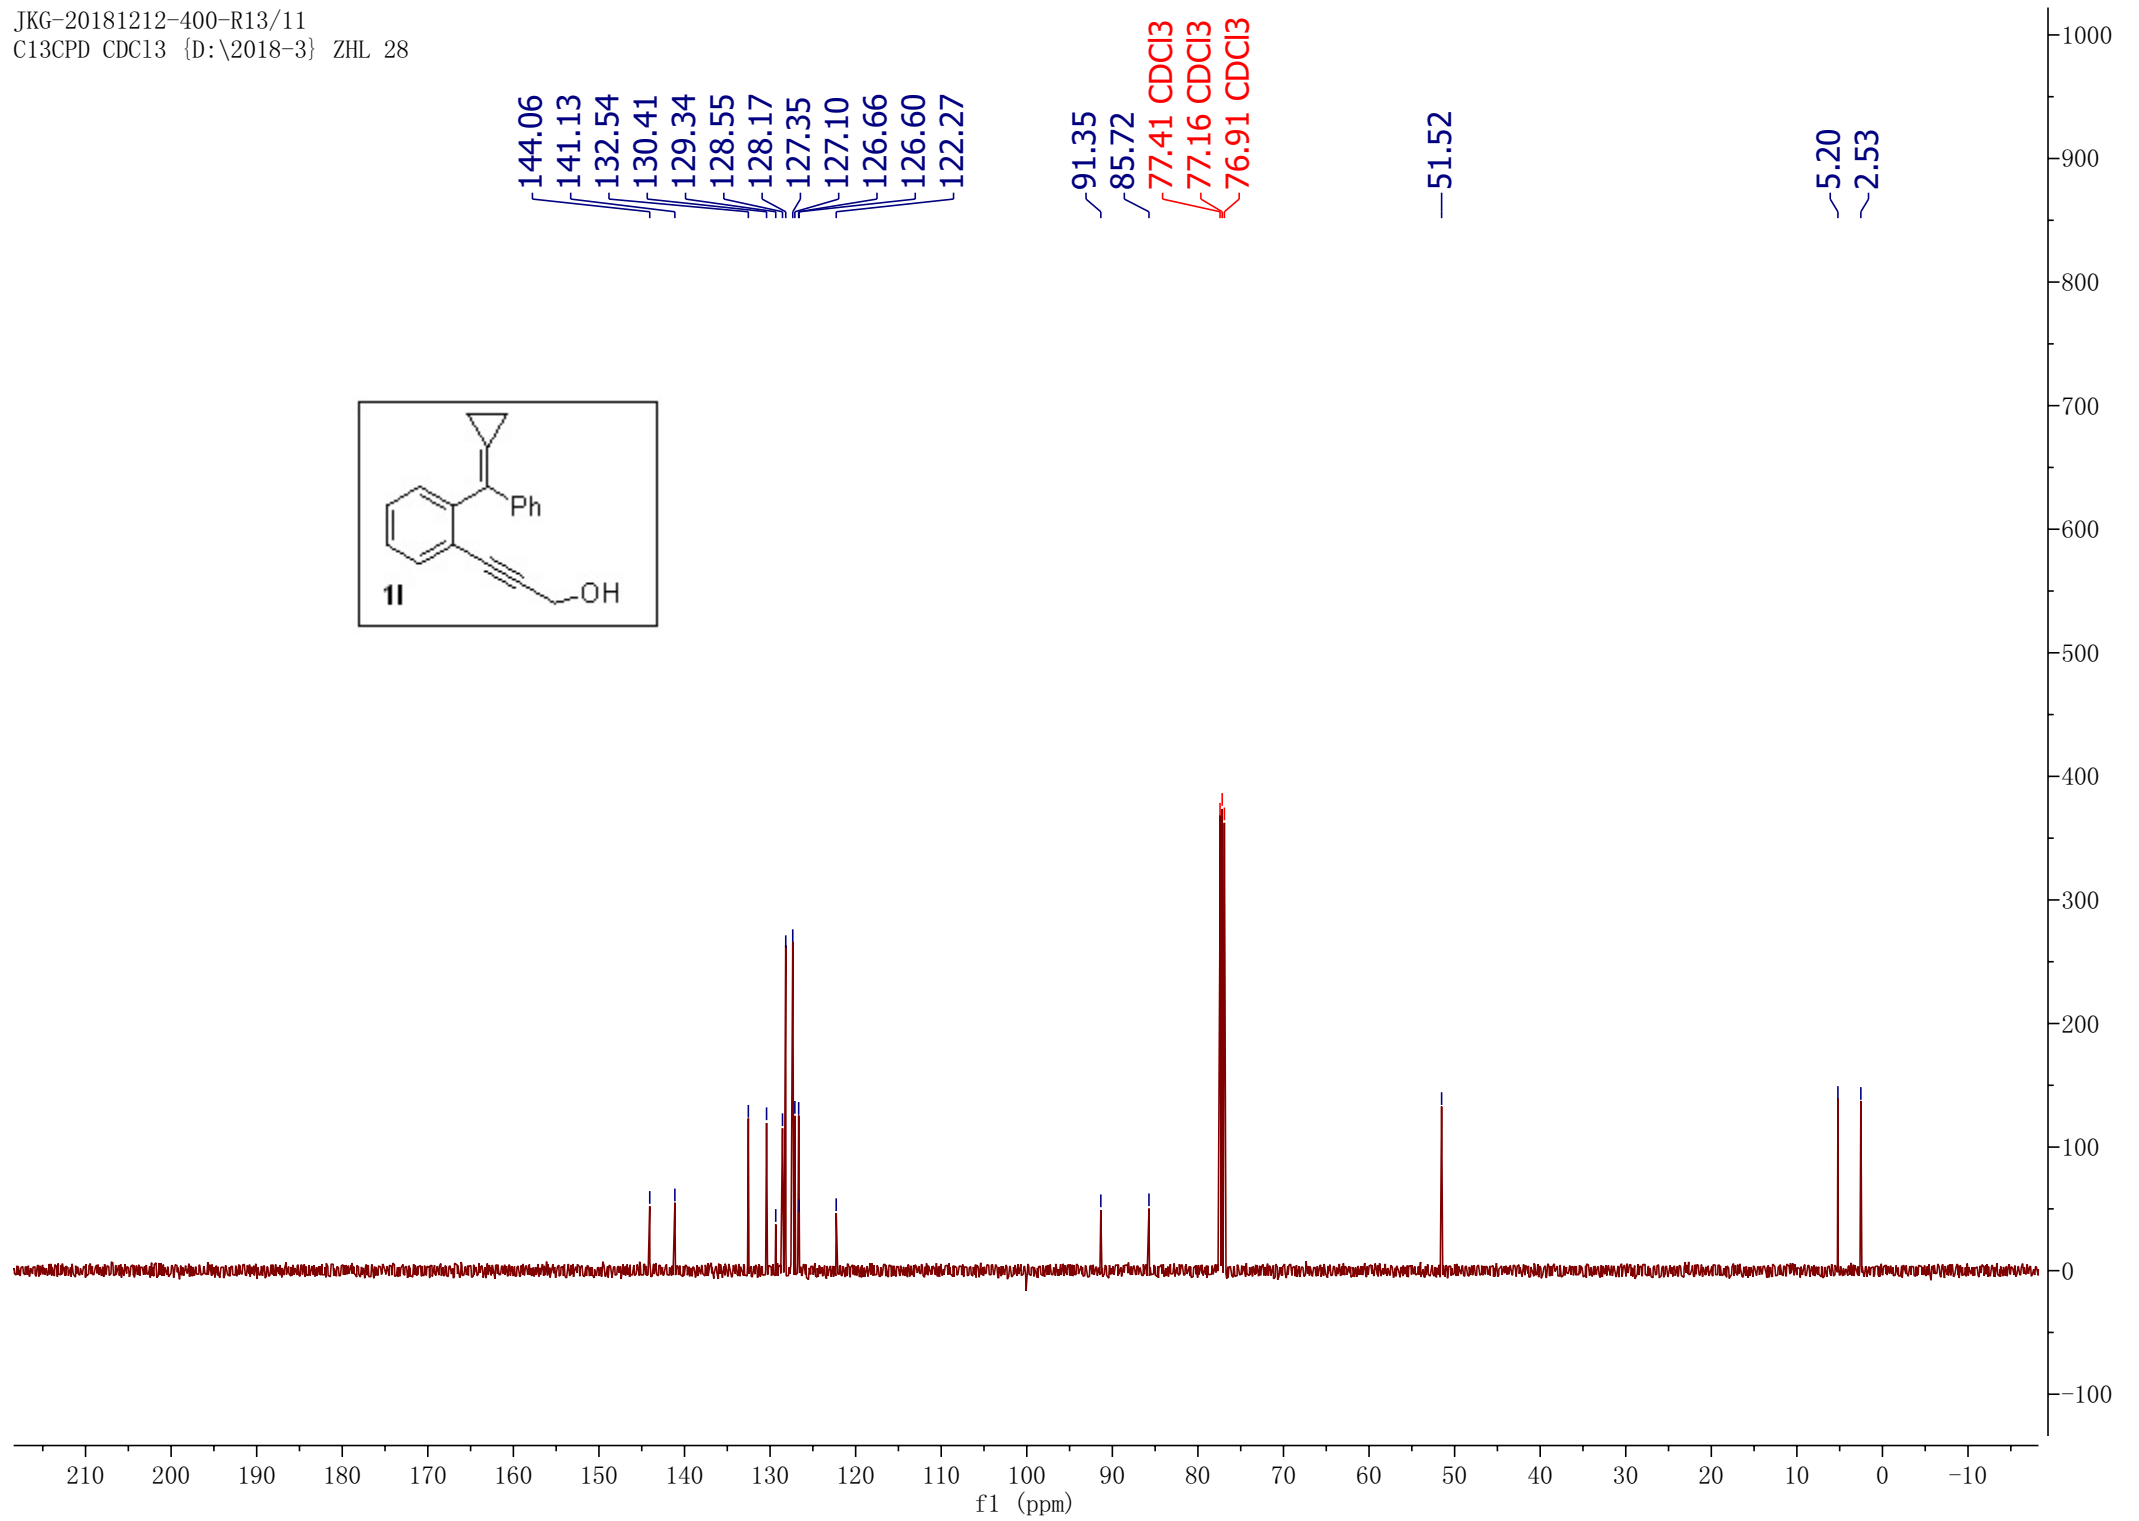



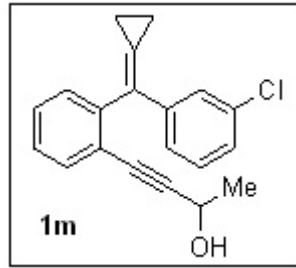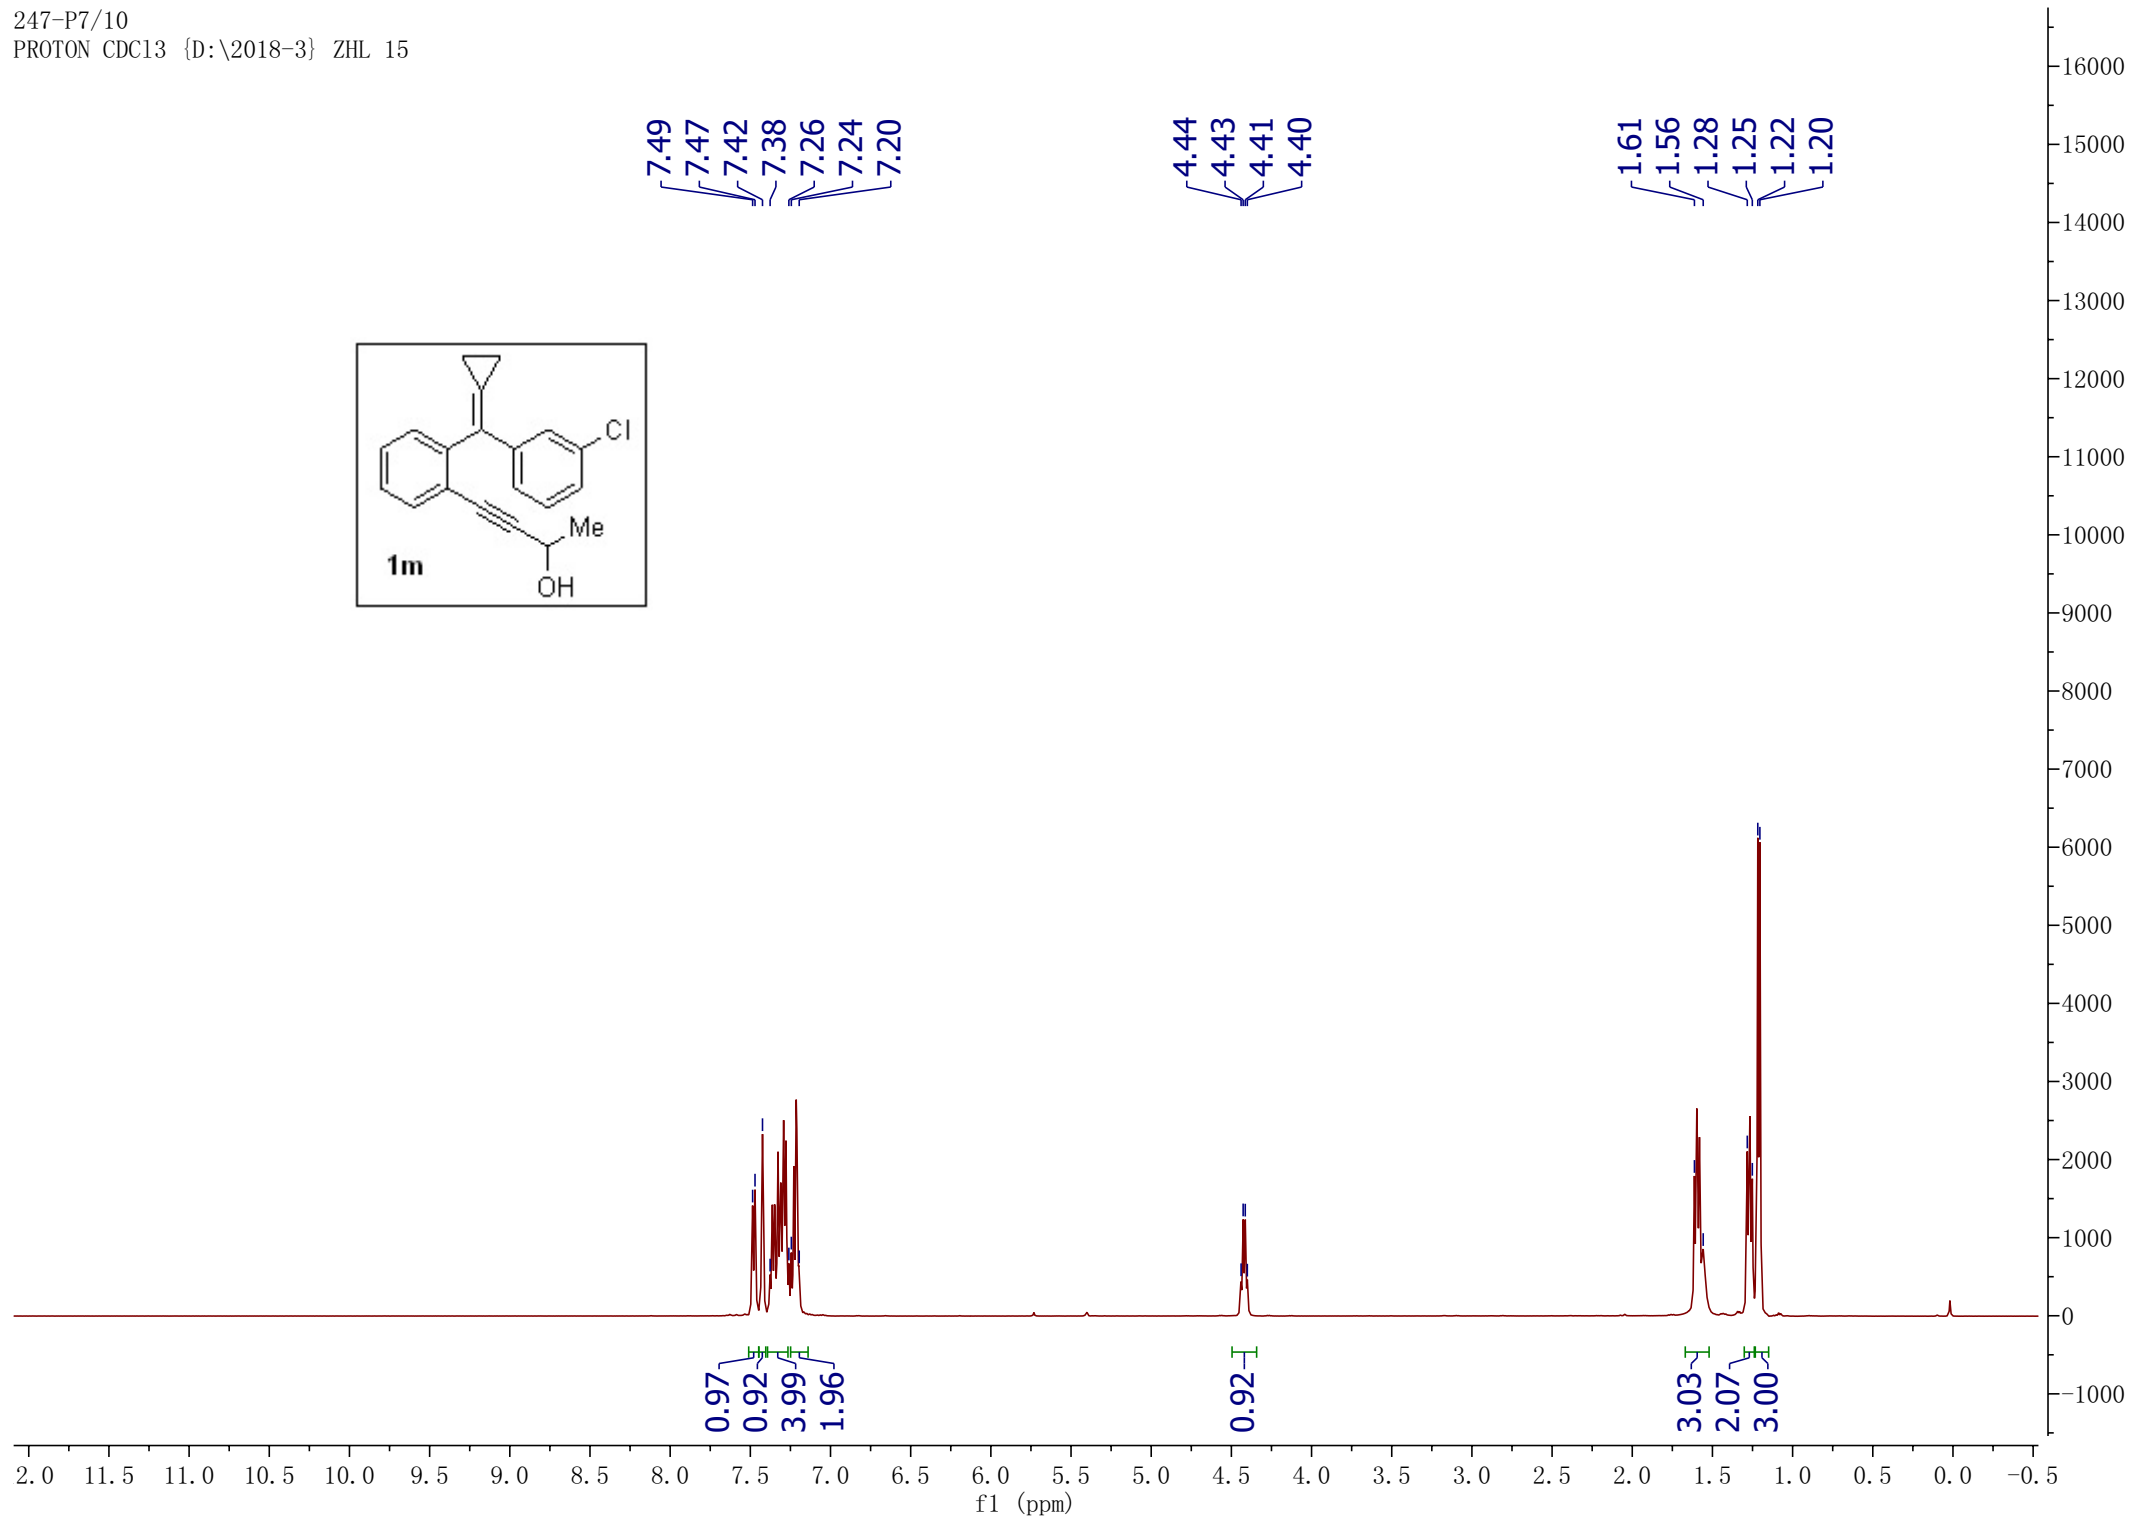

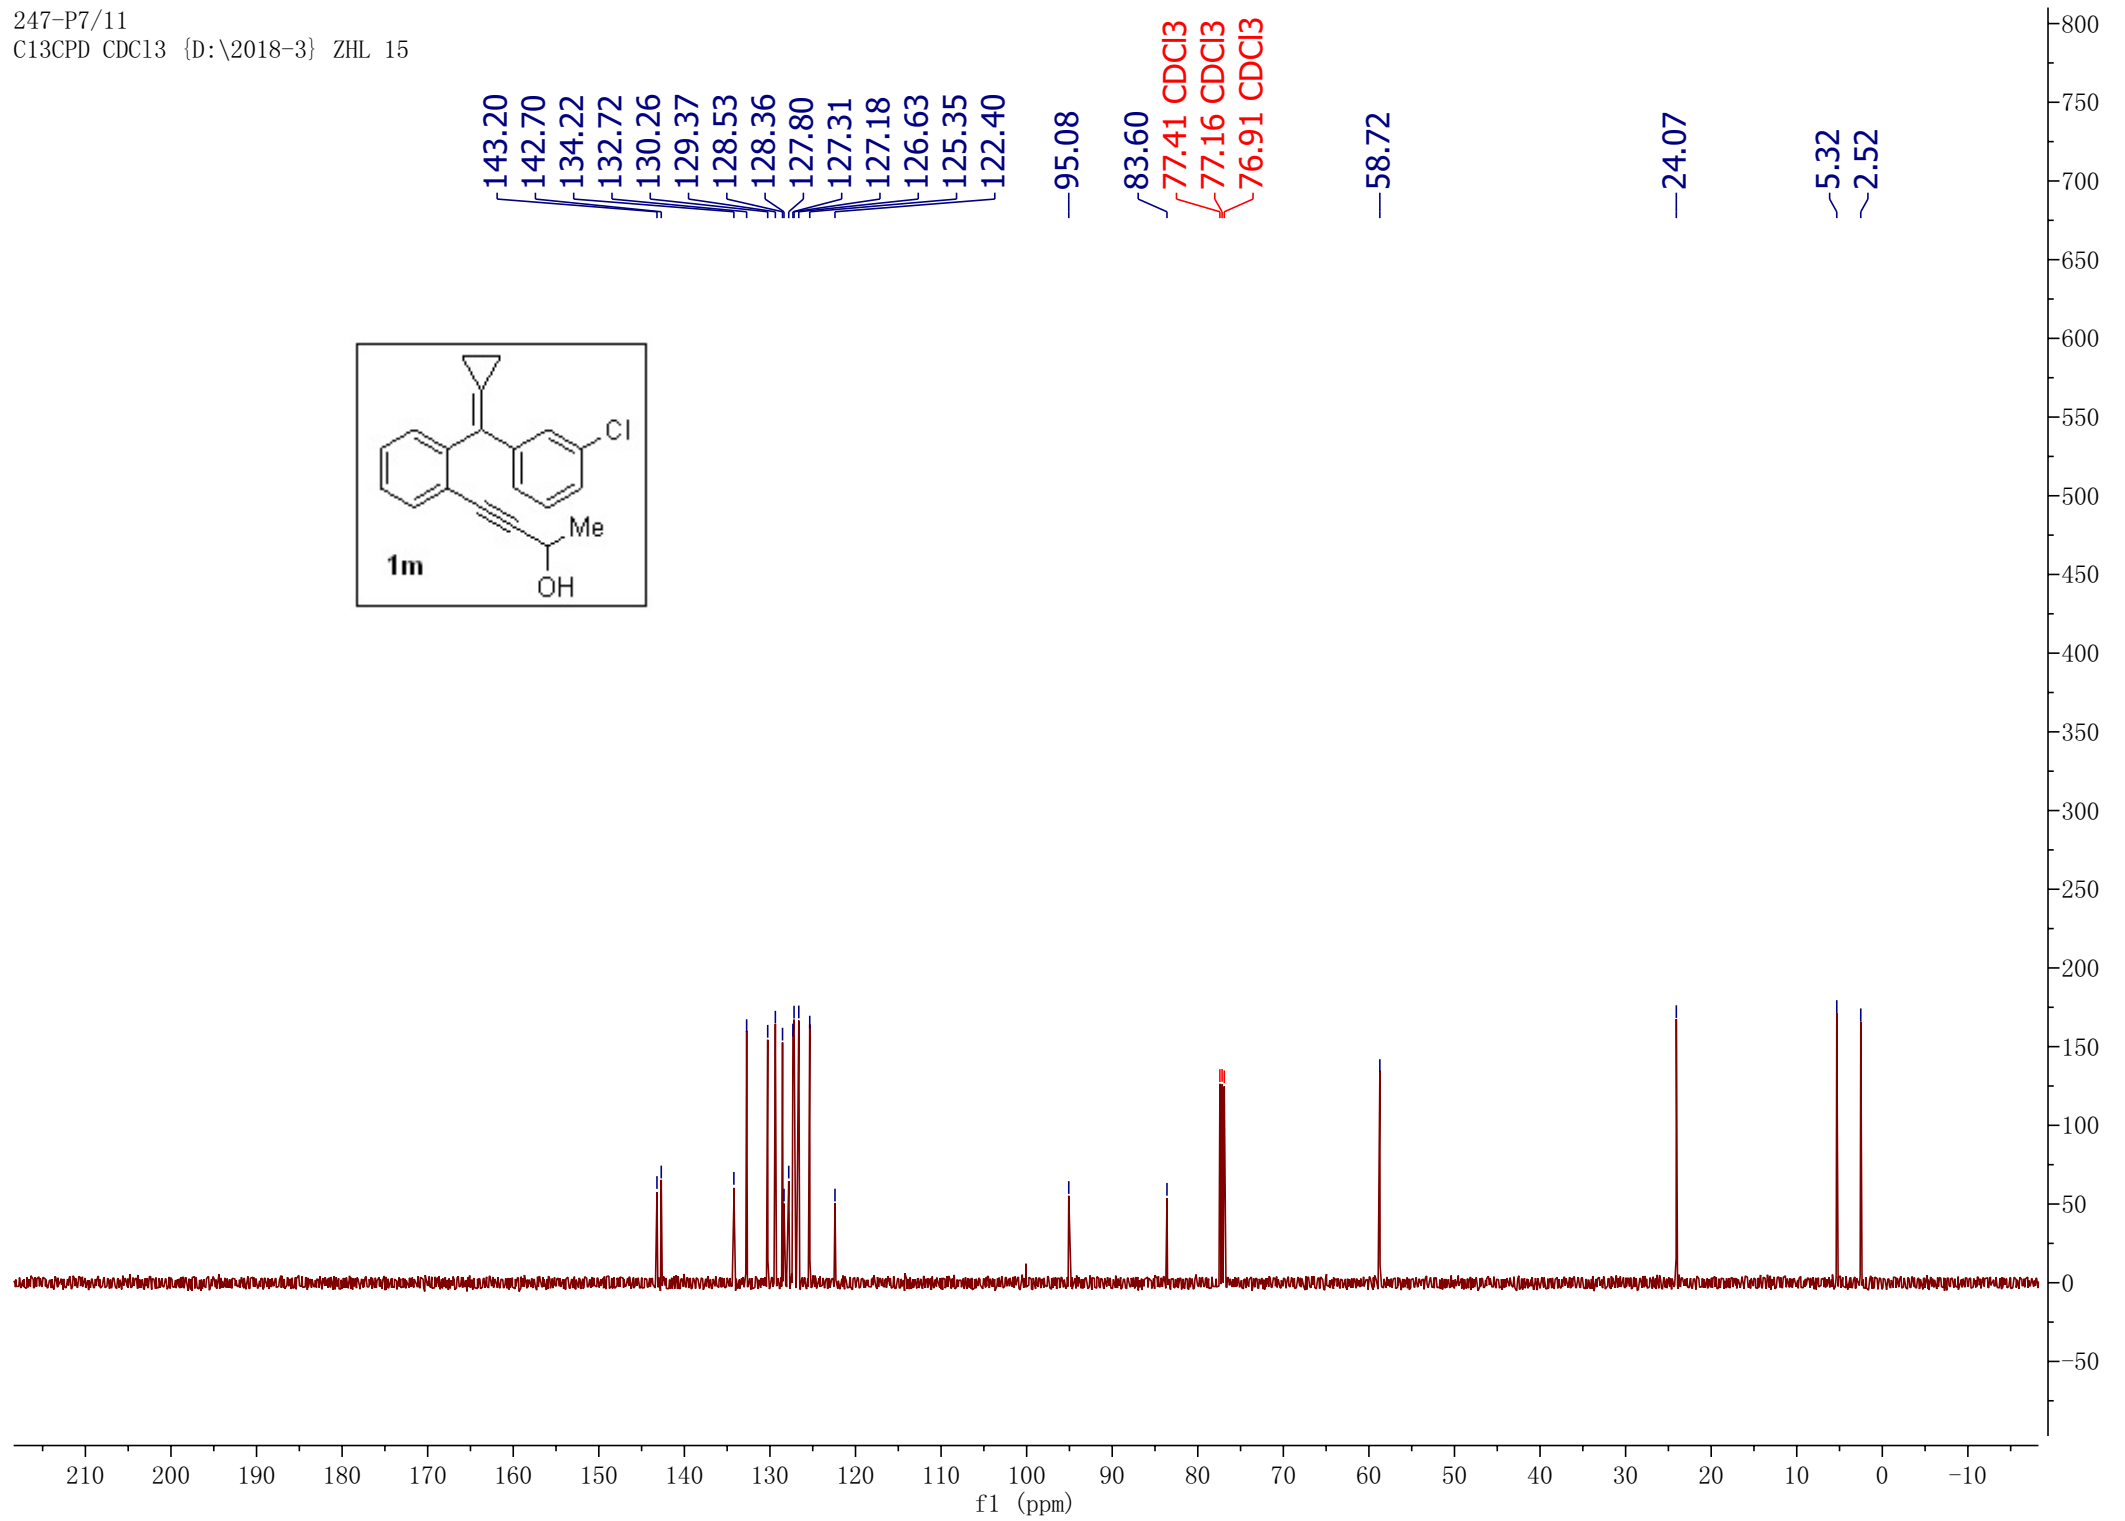

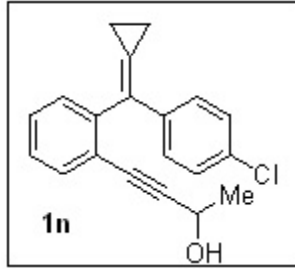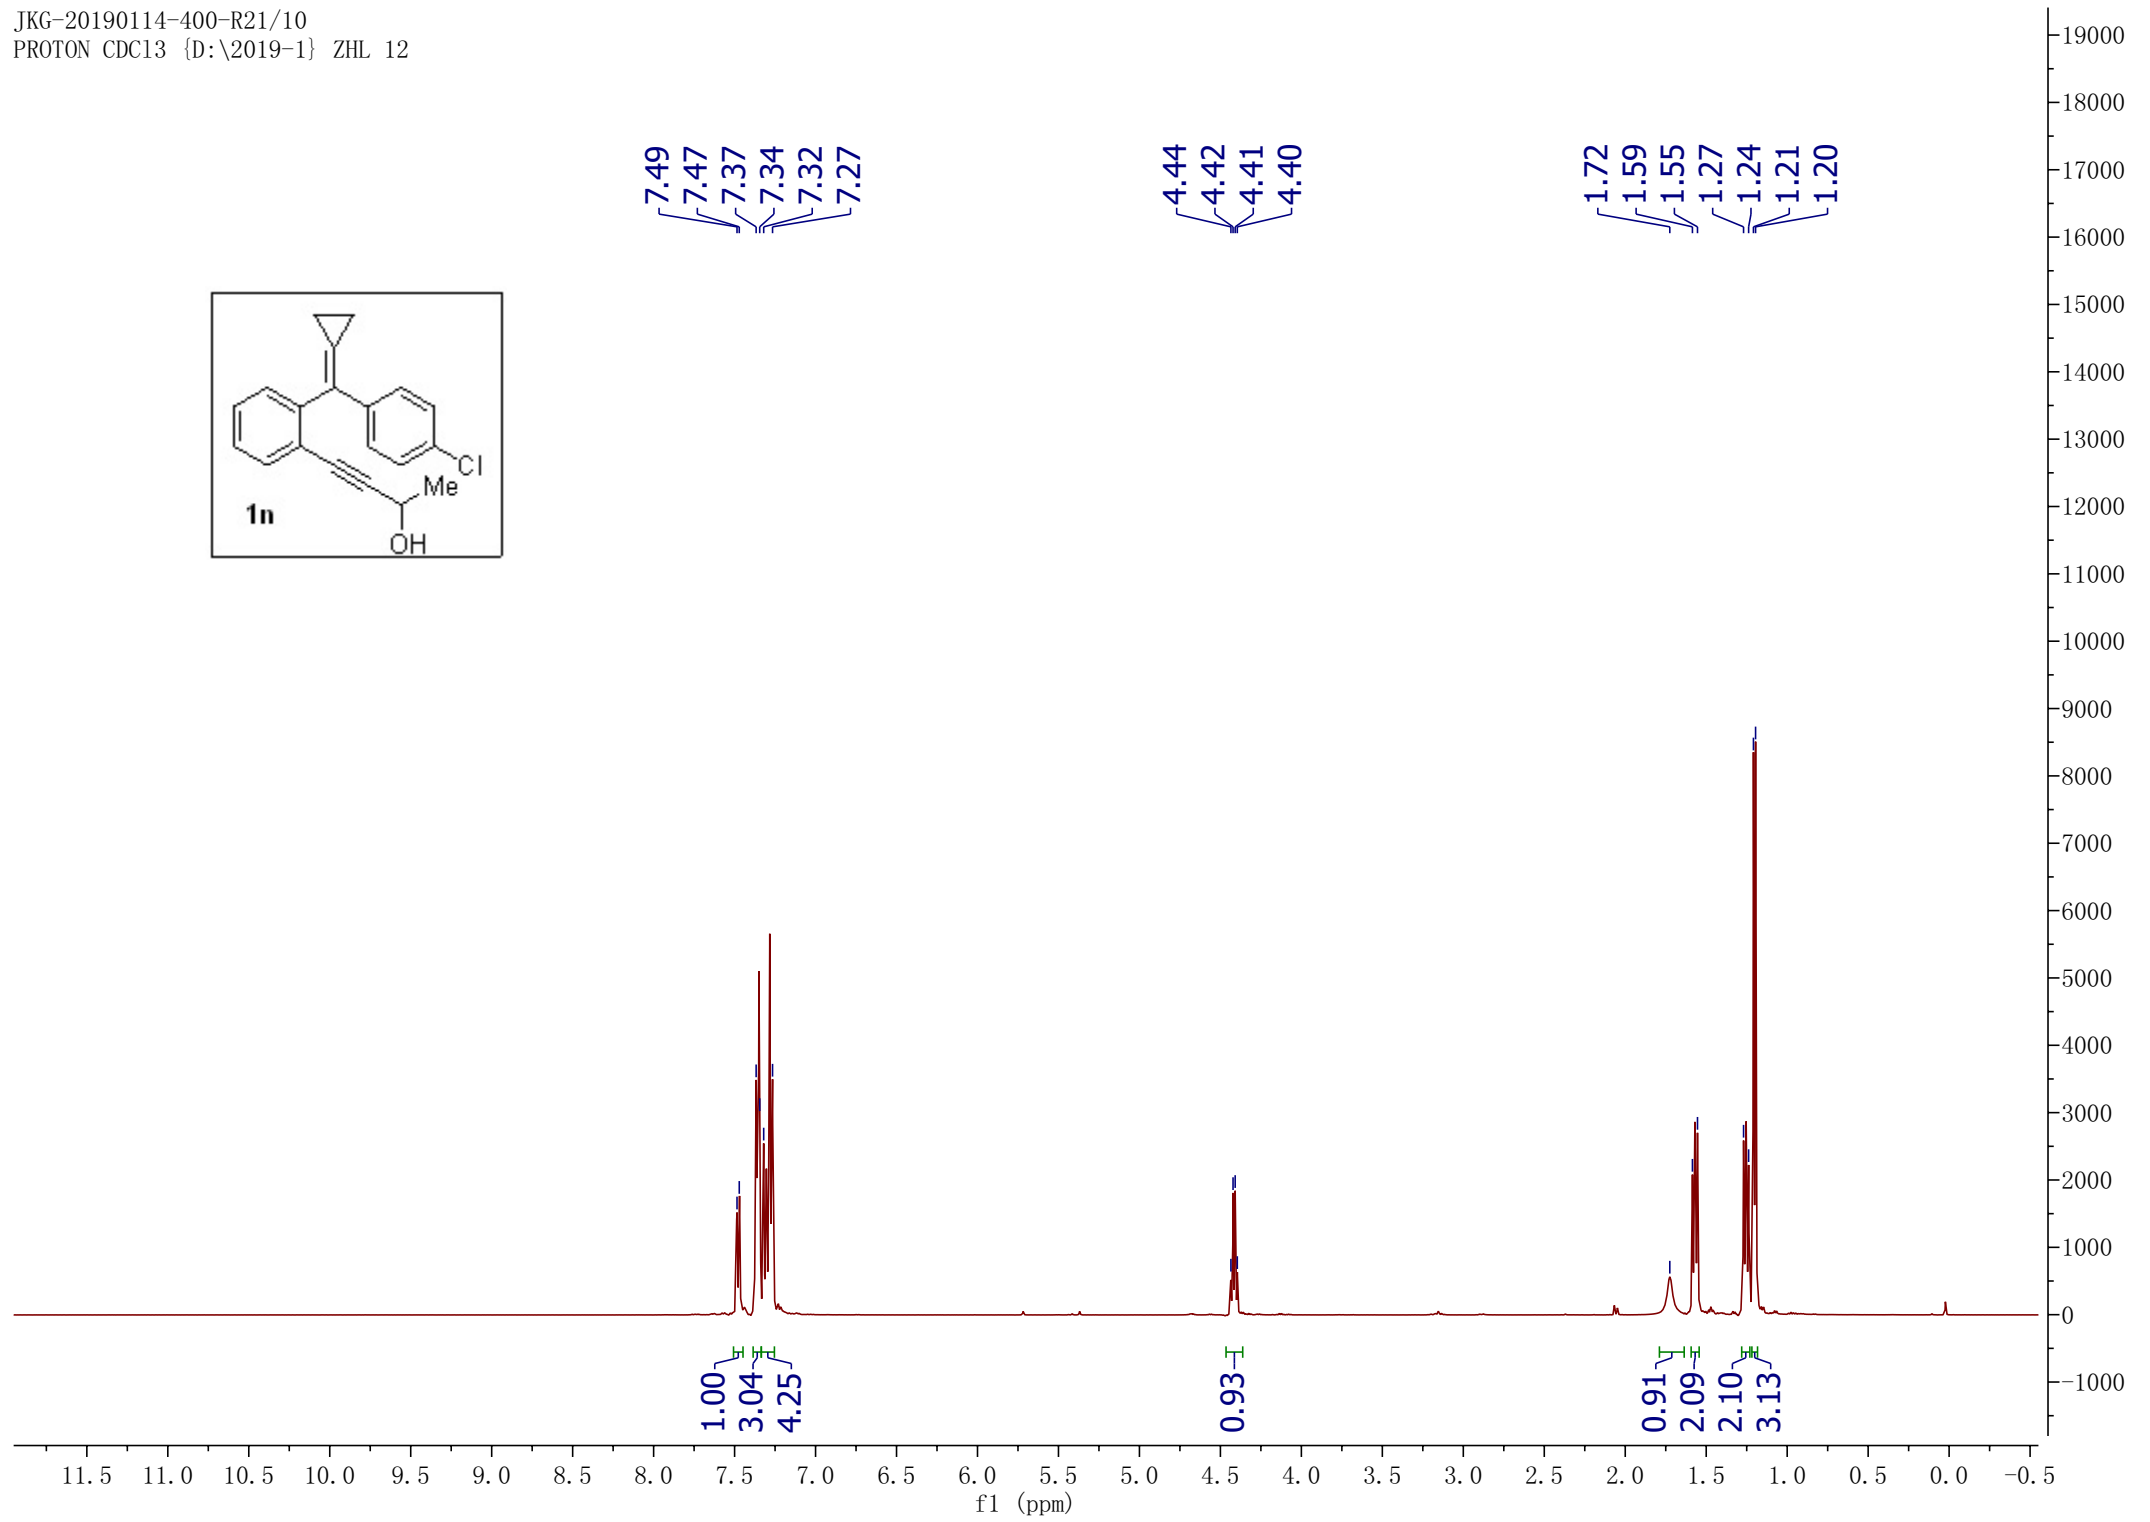

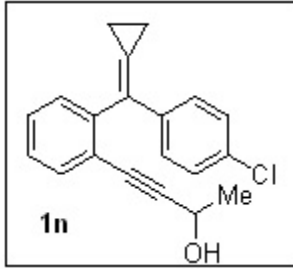

143.39  
139.18  
132.67  
132.37  
130.23  
128.49  
128.39  
128.33  
128.25  
127.23  
126.84  
122.36

—94.95

83.58

77.41 CDC13

77.16 CDC13

76.91 CDC13

—58.67

—24.04

~5.26

~2.44

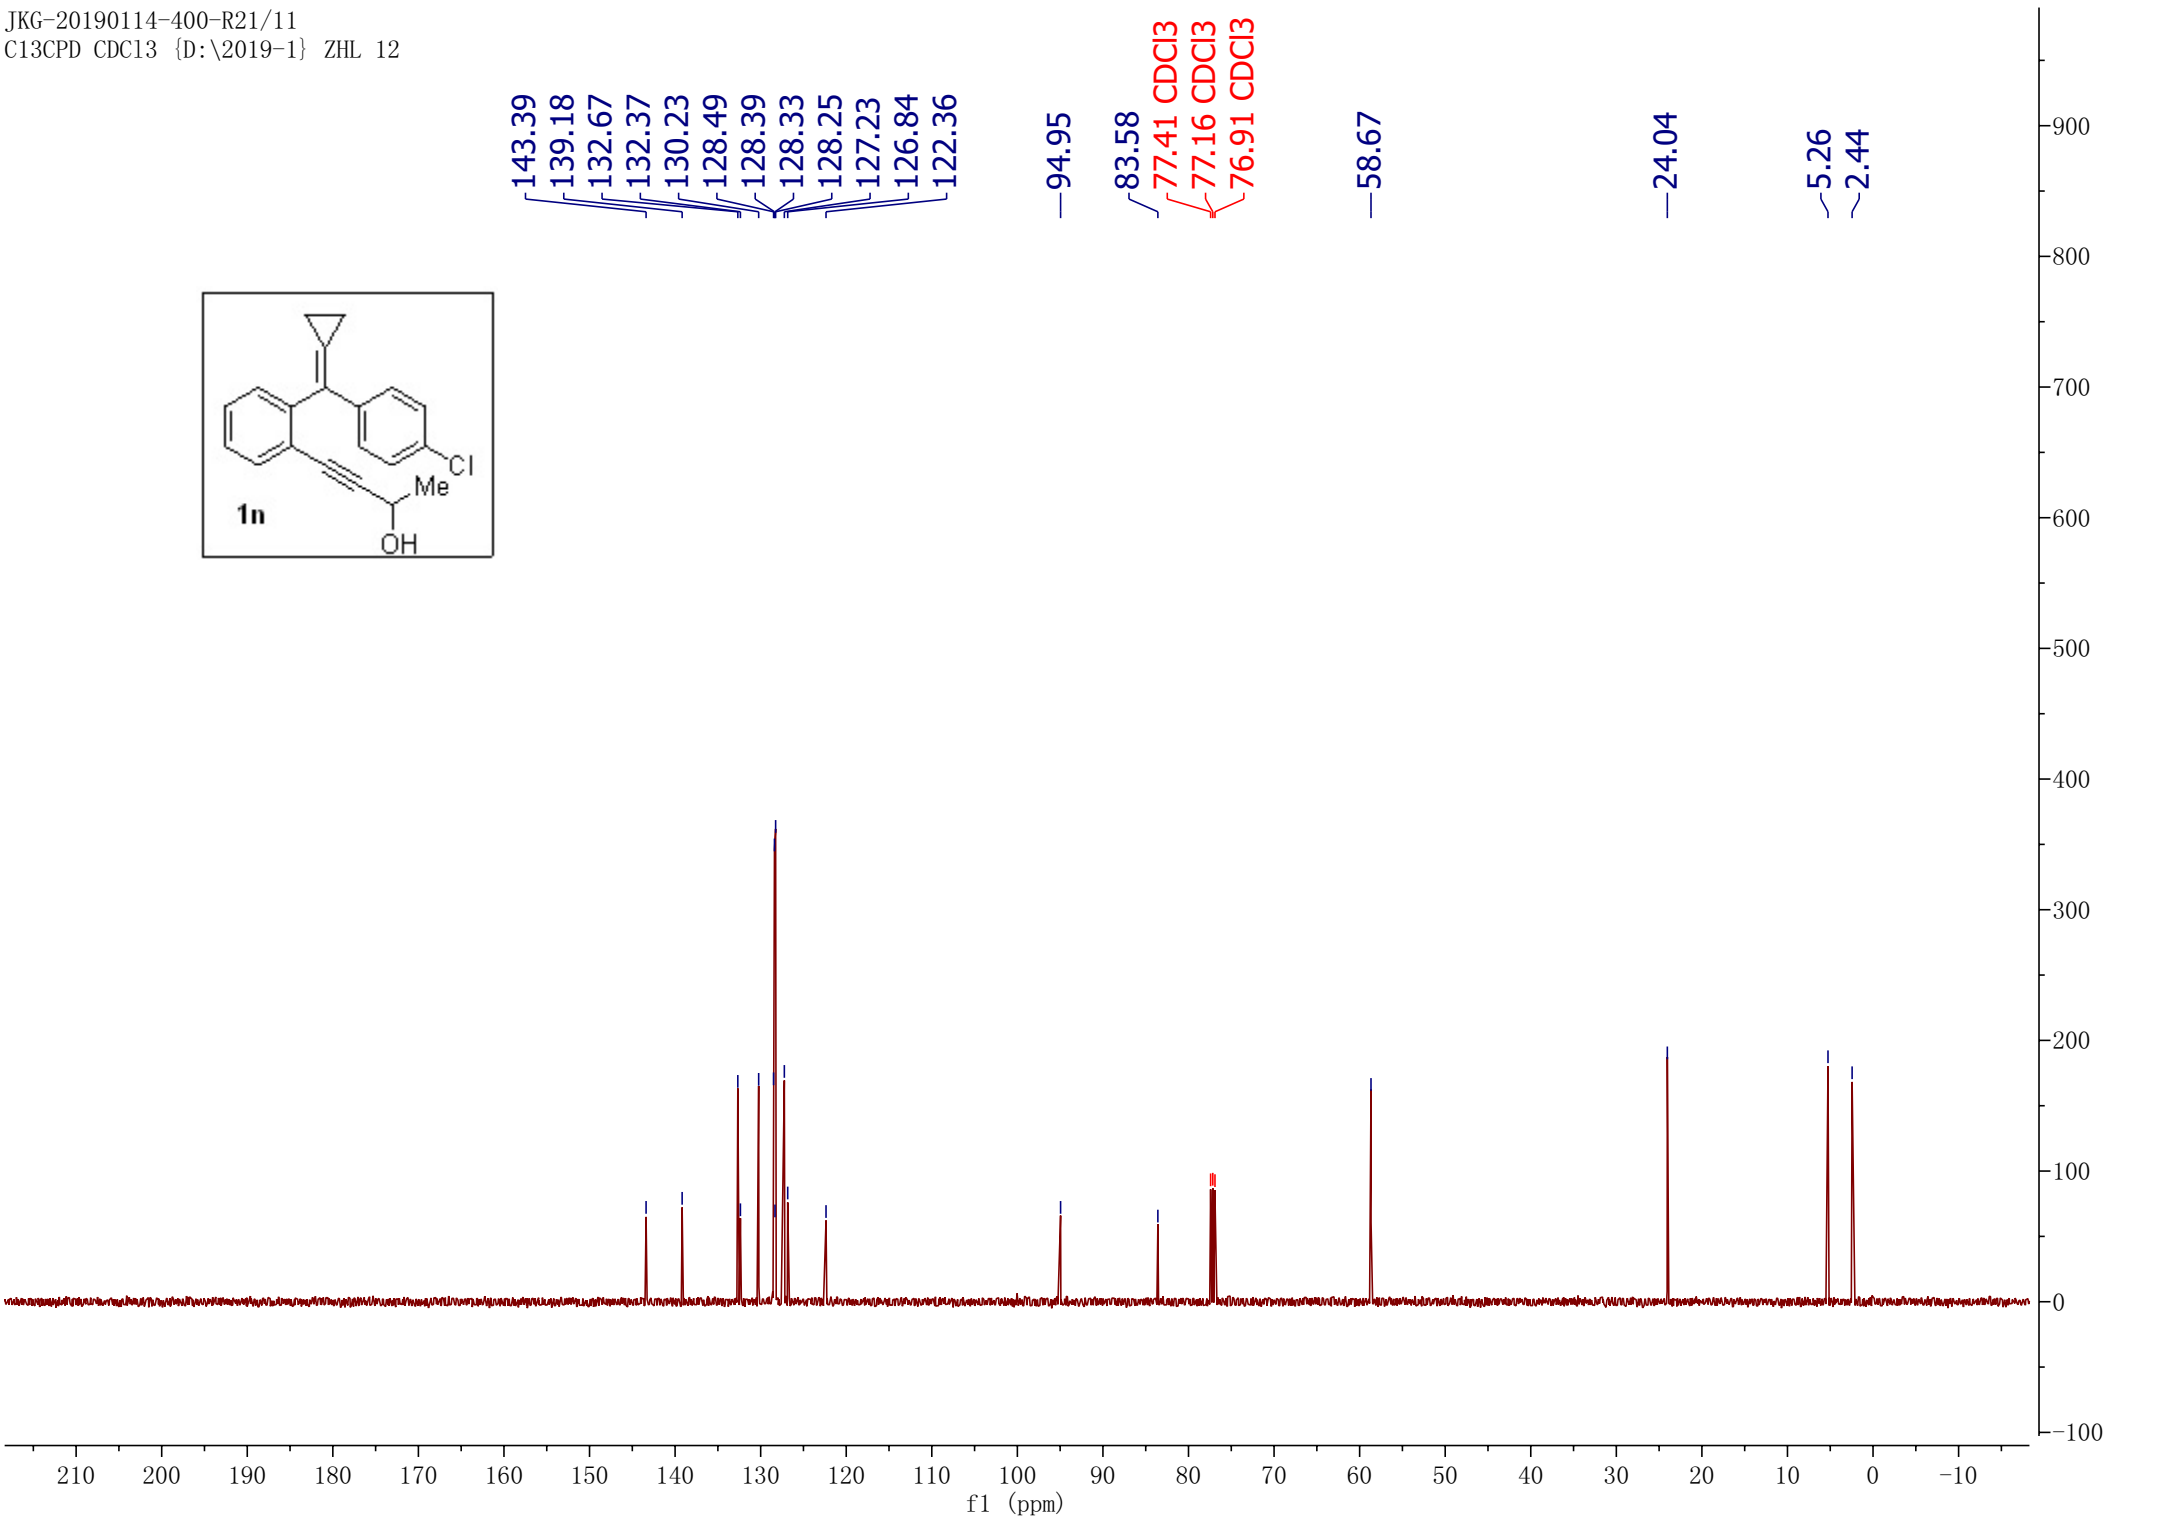

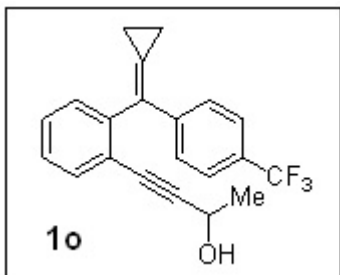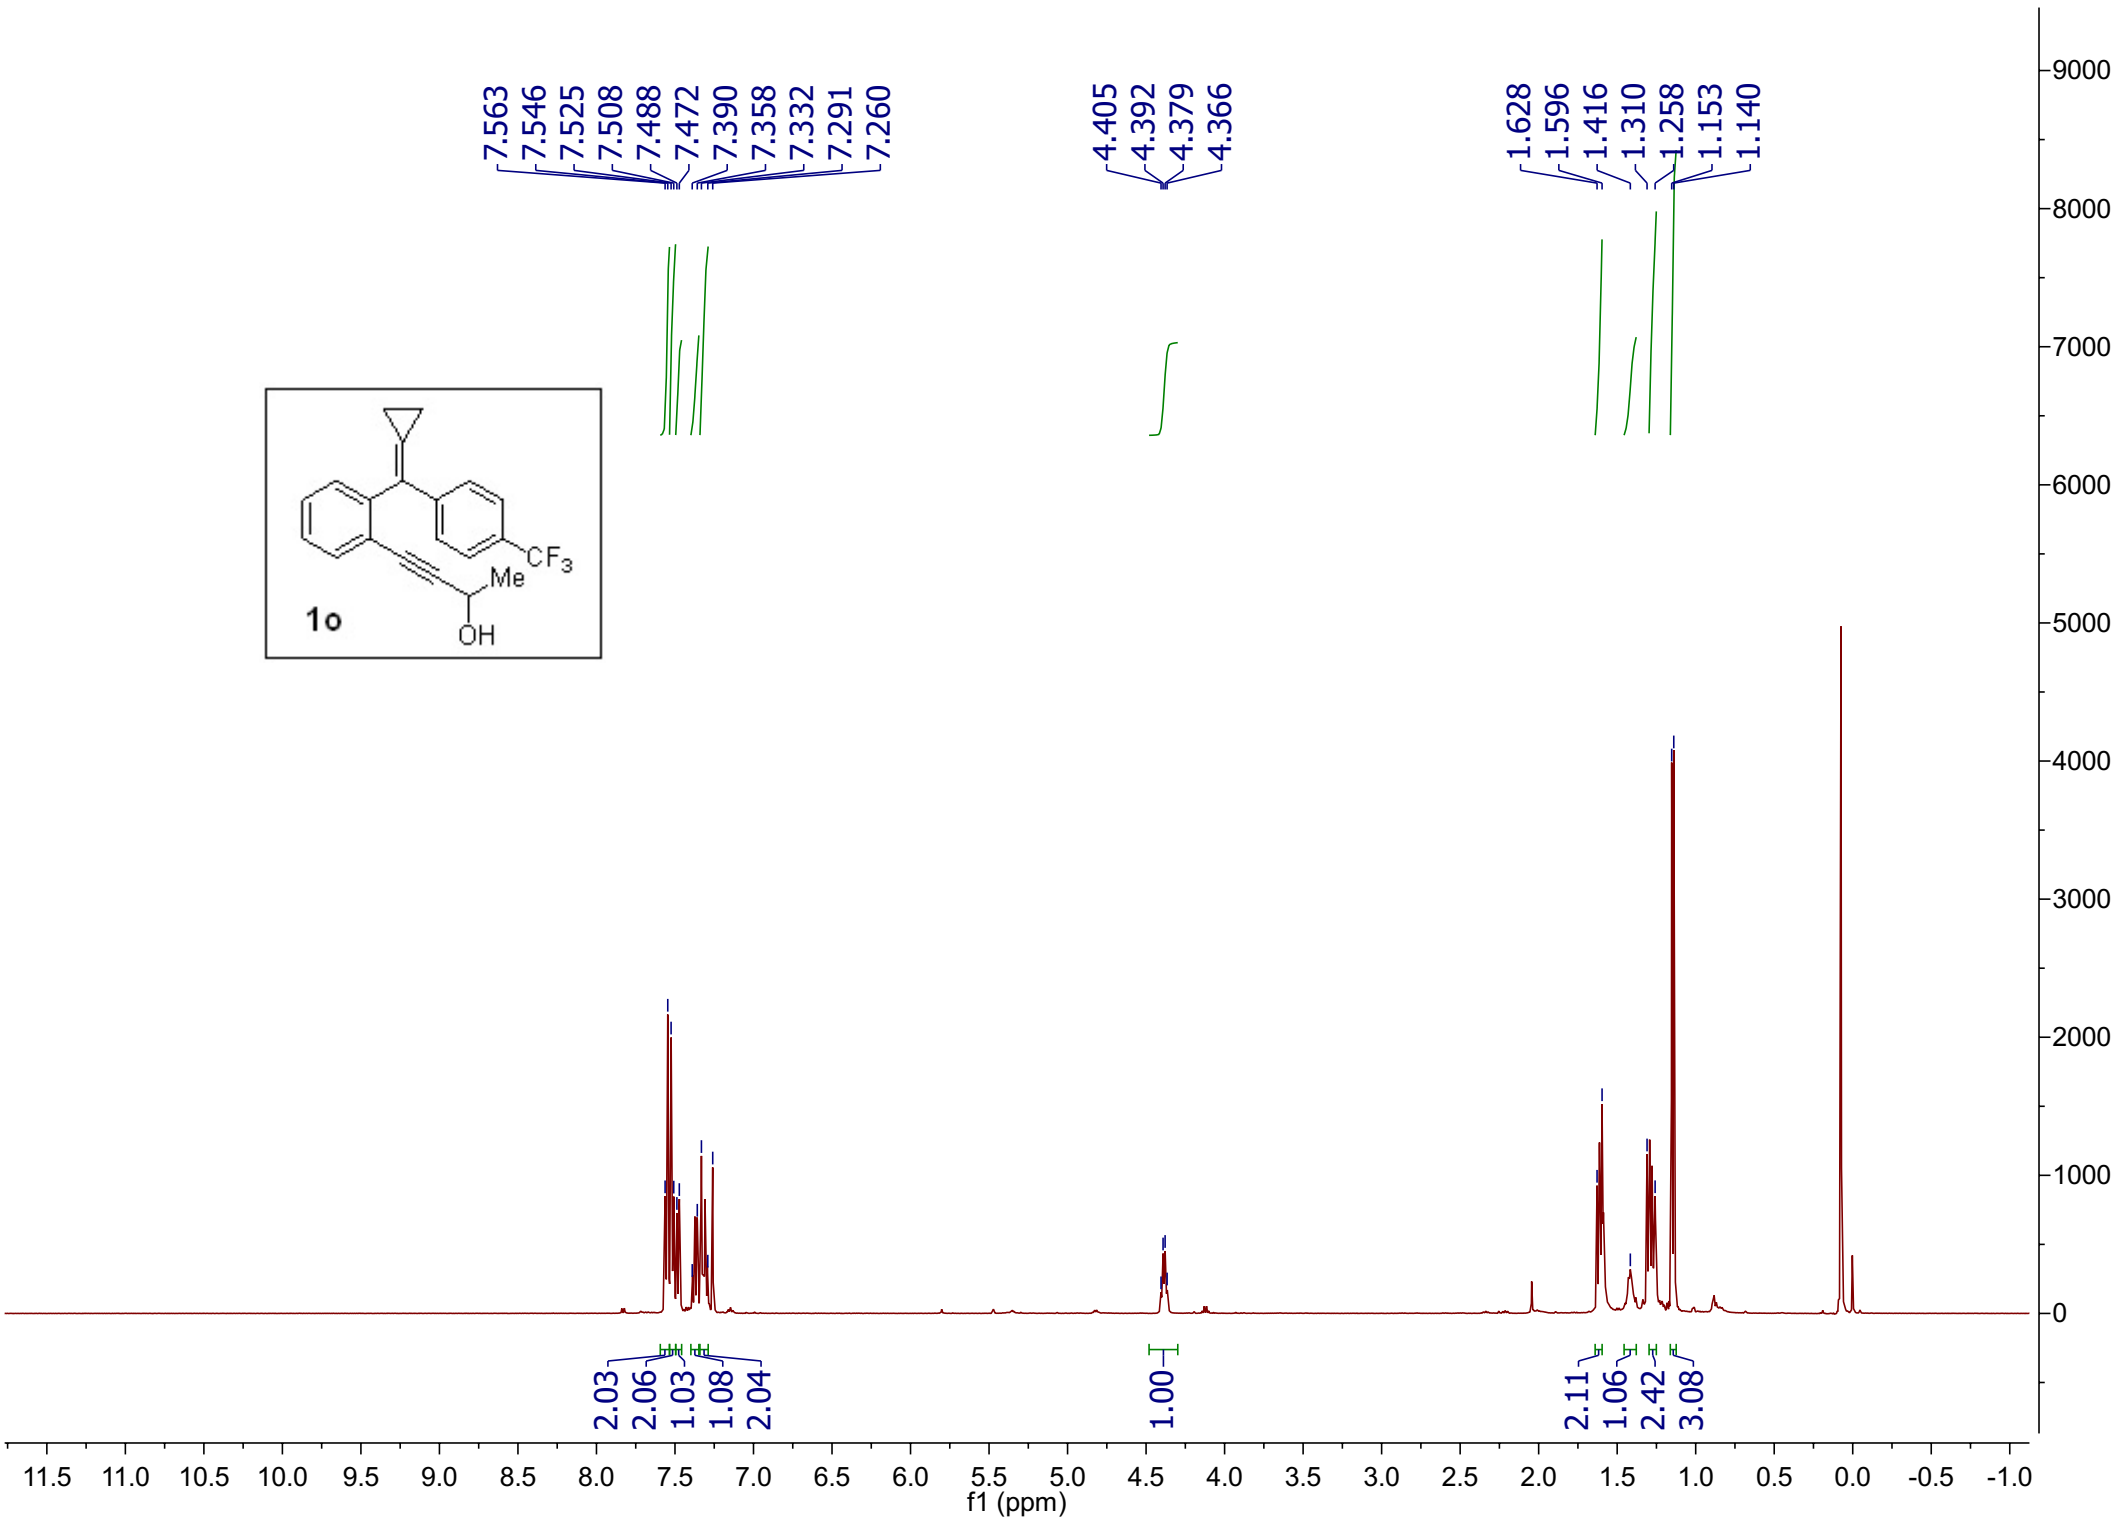

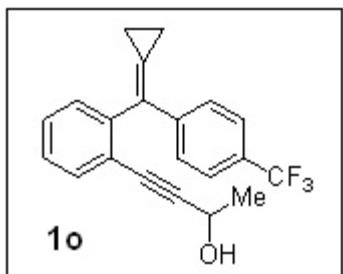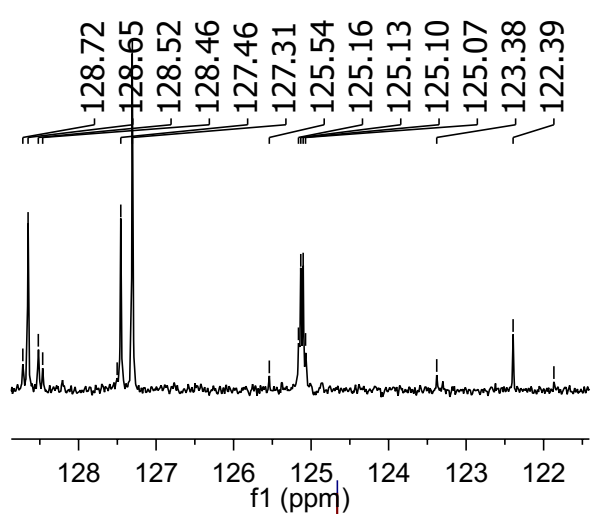

144.23  
 143.07  
 132.81  
 130.32  
 129.04  
 128.72  
 128.65  
 128.52  
 128.46  
 127.50  
 127.46  
 127.31  
 125.54  
 125.16  
 125.13  
 125.10  
 125.07  
 123.38  
 122.39  
 121.87  
 95.14

83.56  
 77.41 CDCl3  
 77.16 CDCl3  
 76.91 CDCl3

58.74

24.01

5.42

2.59

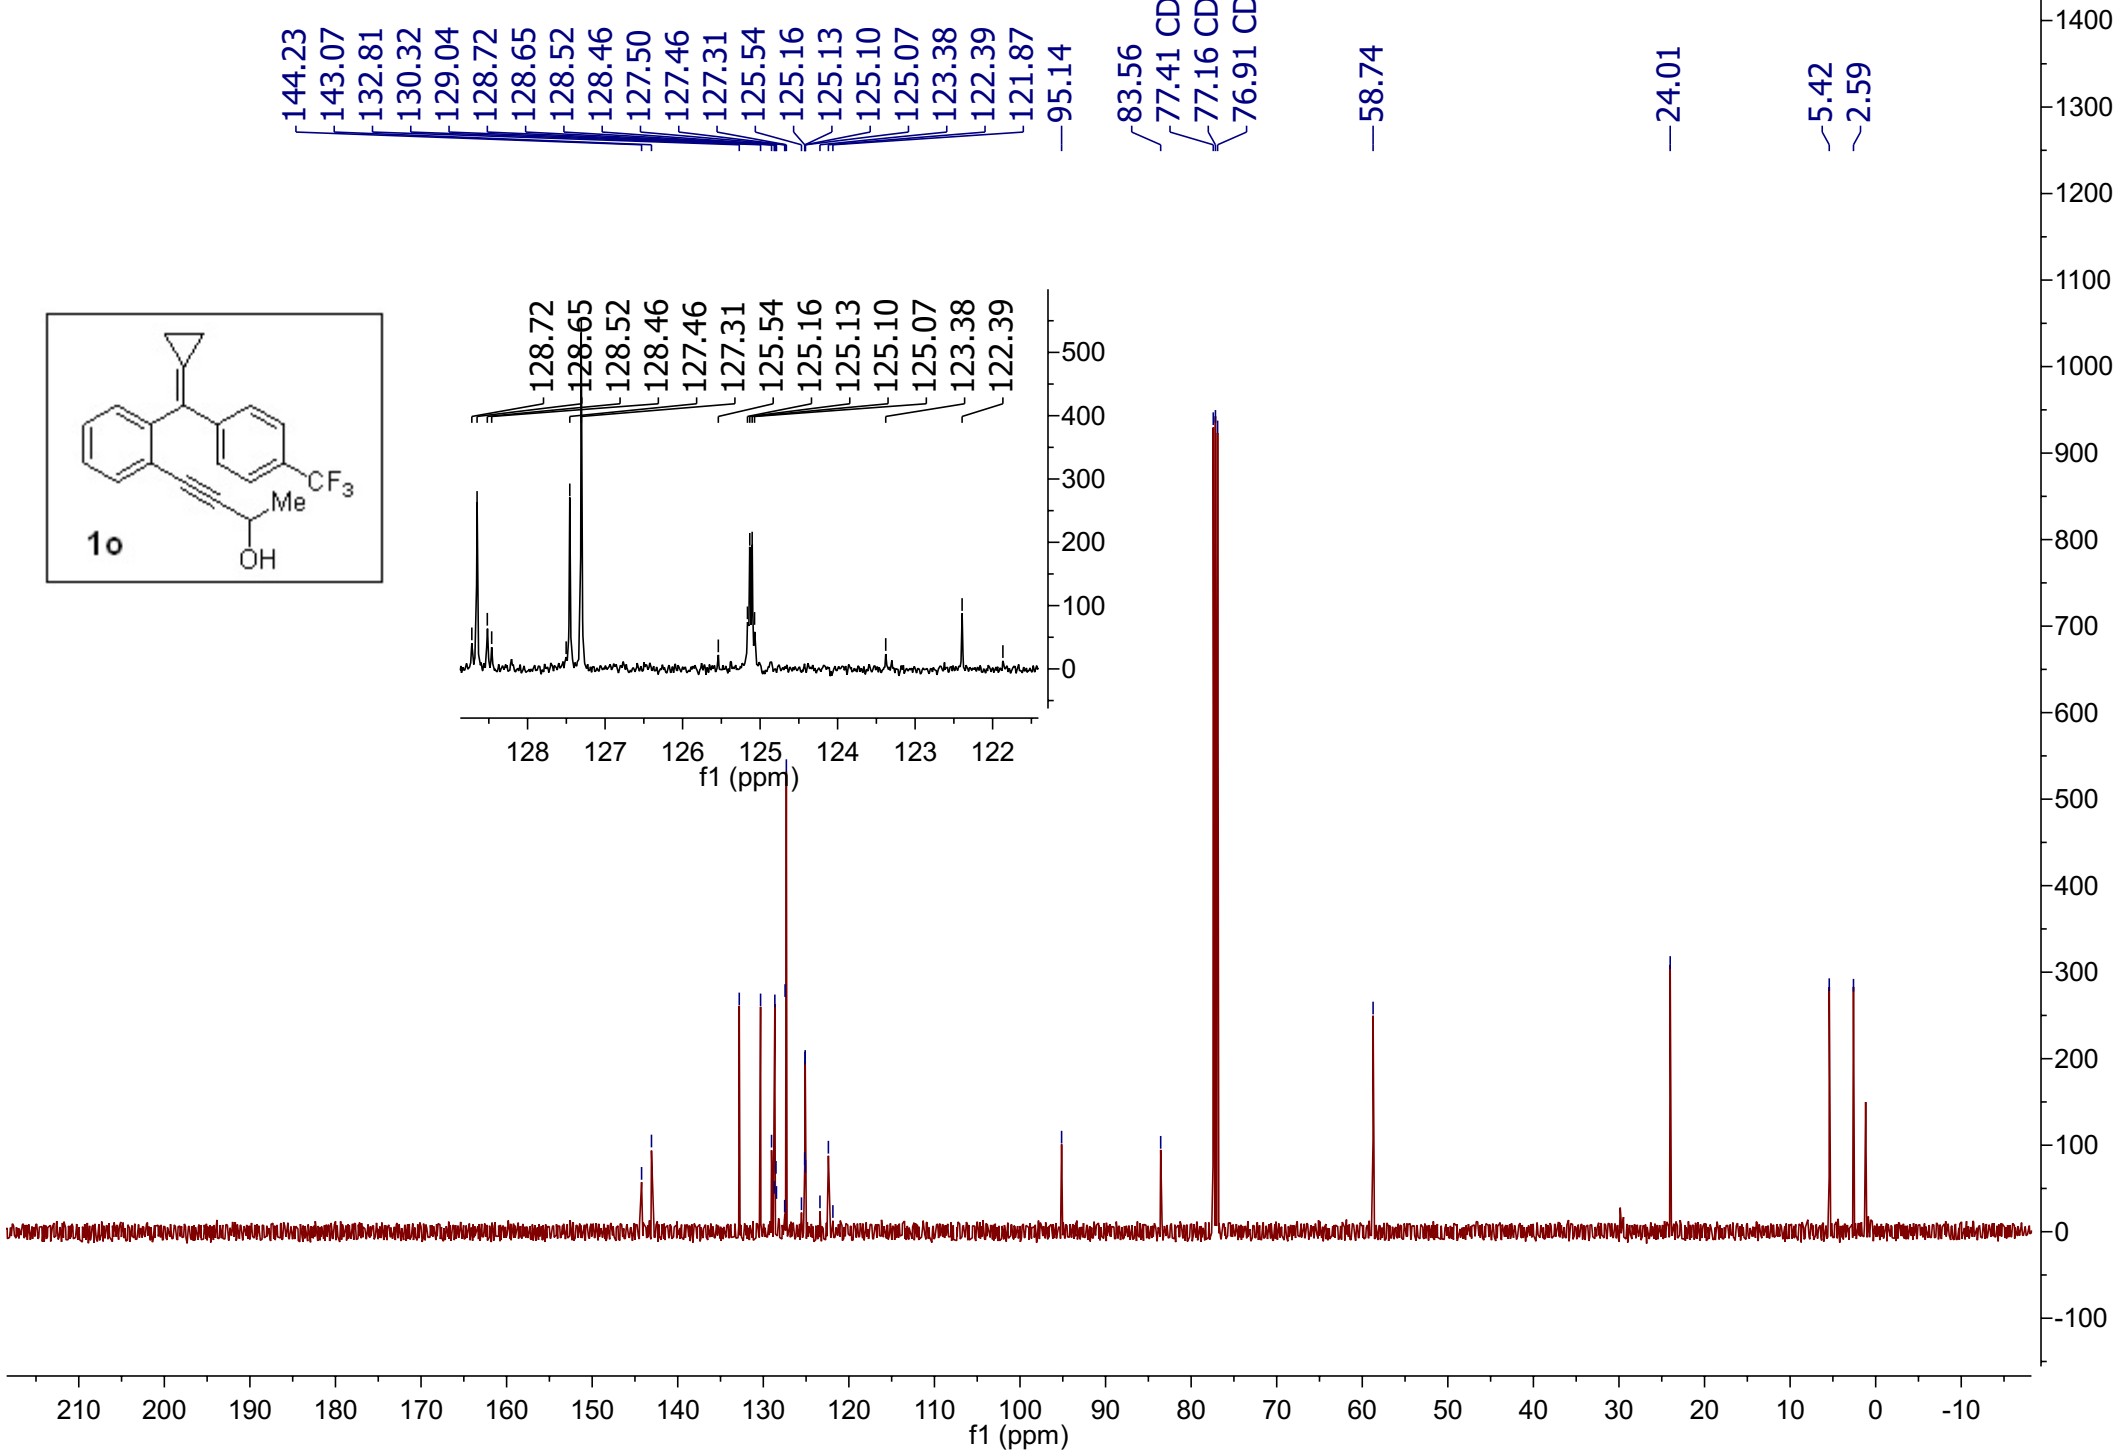

$^{19}\text{F}$  NMR (471 MHz,  $\text{CDCl}_3$ )  $\delta$  -62.3.

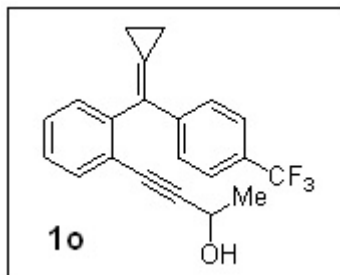

---62.34

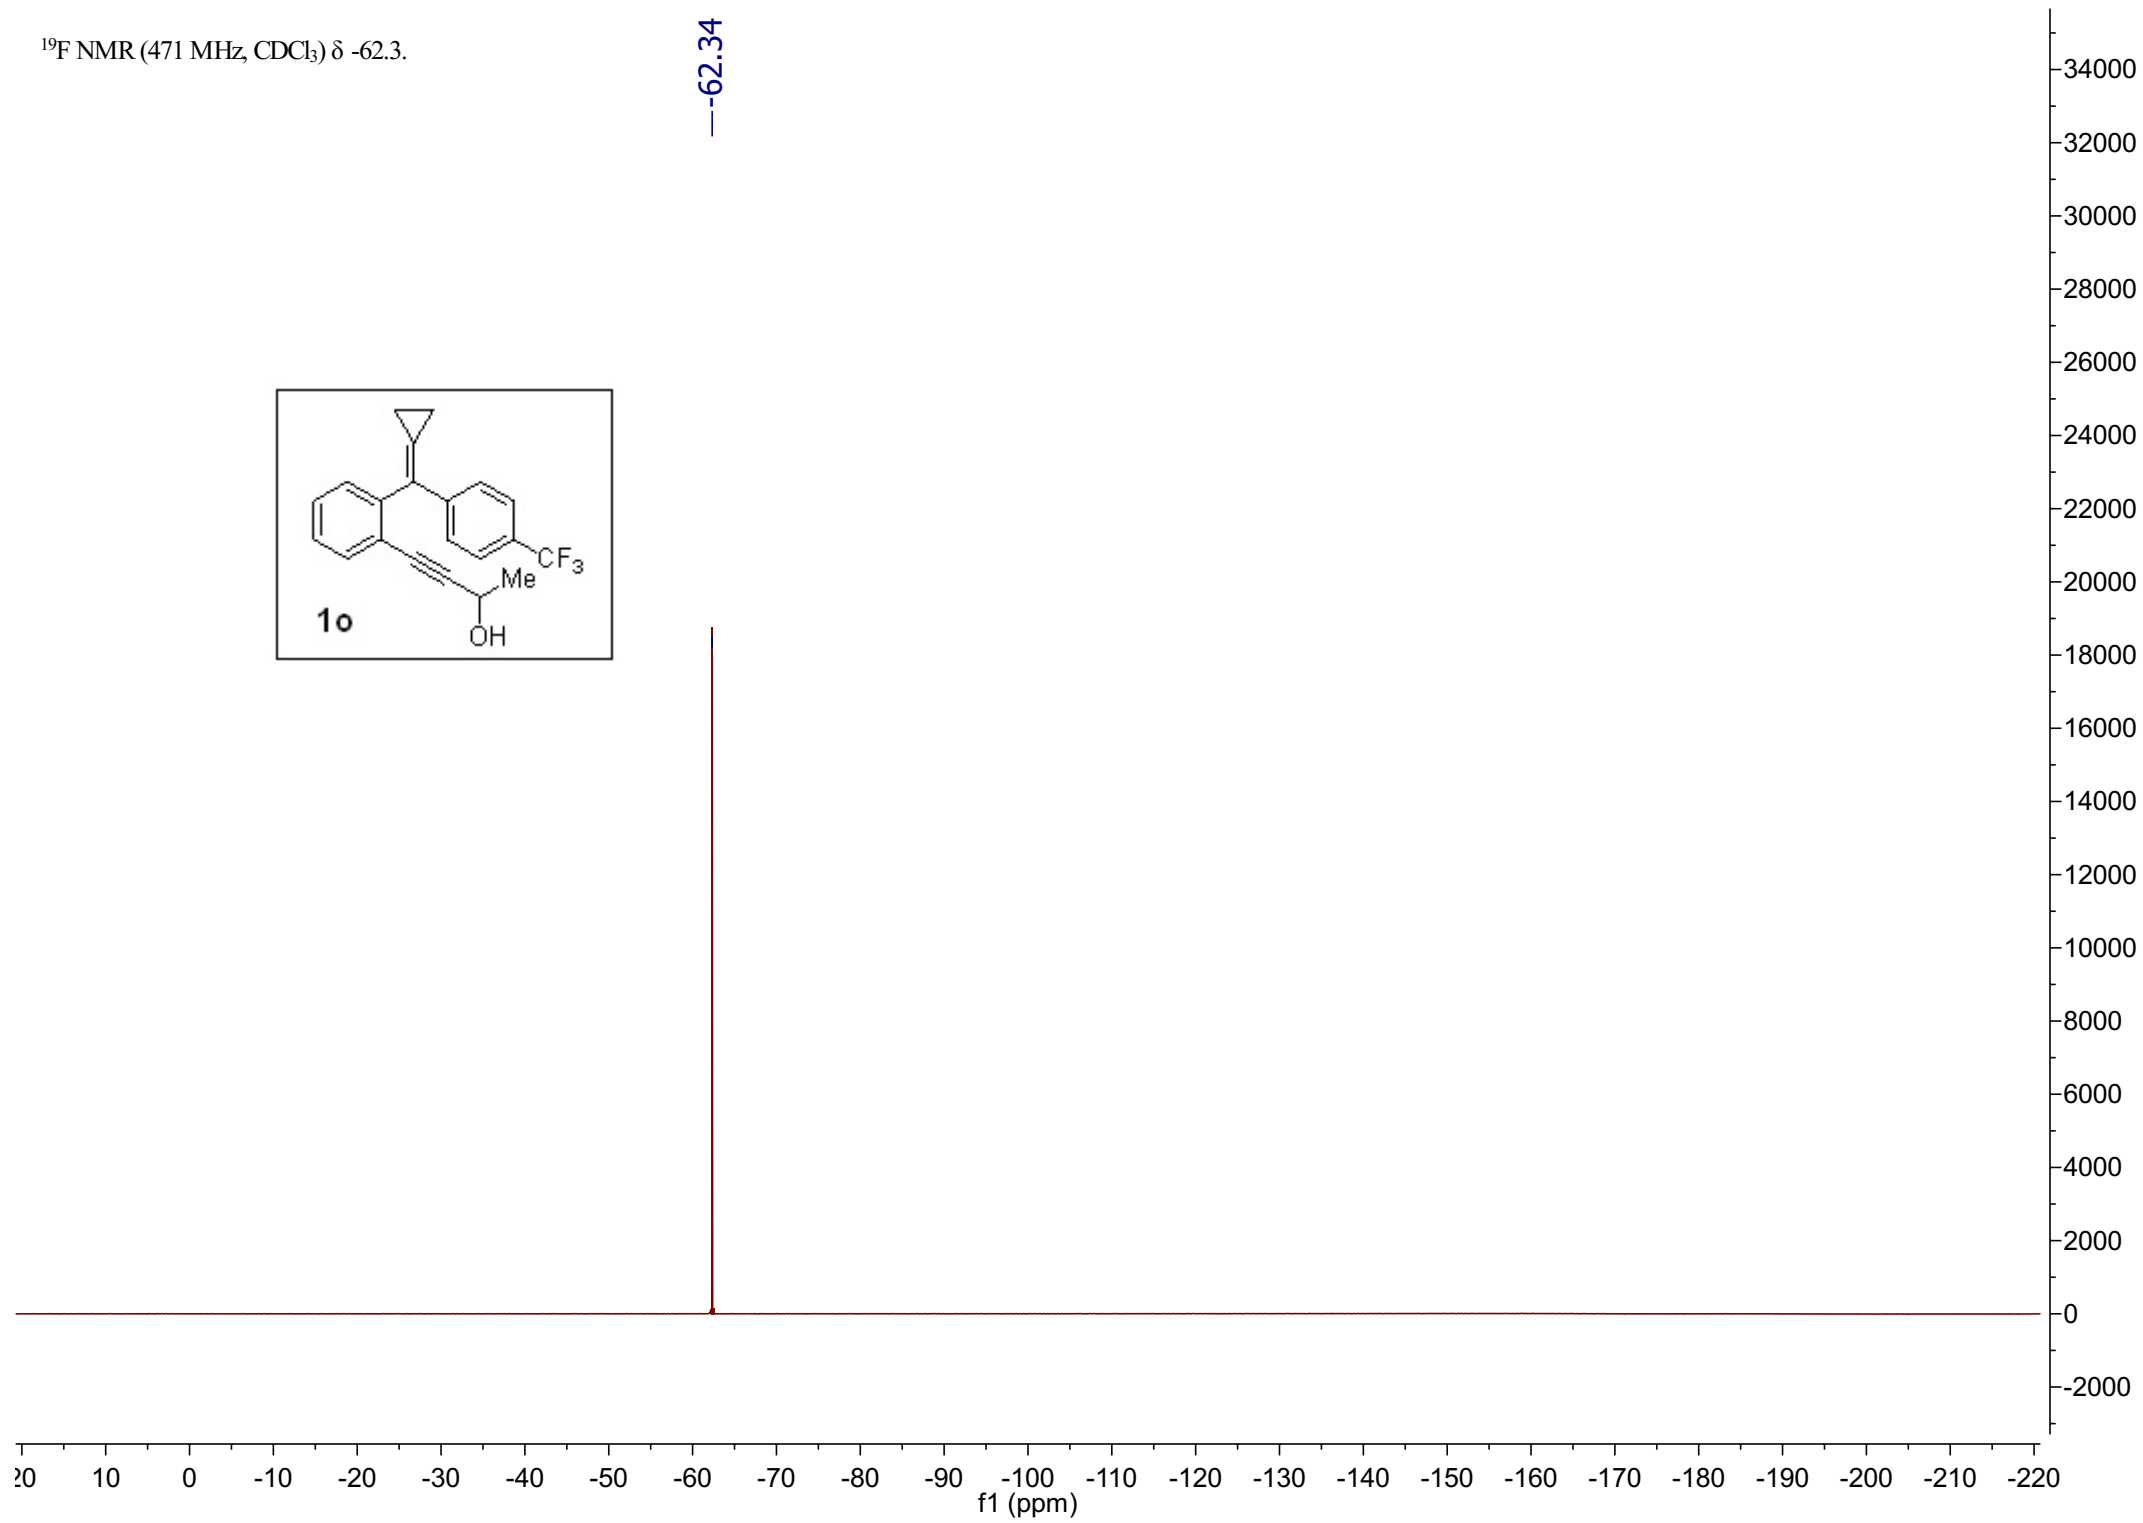

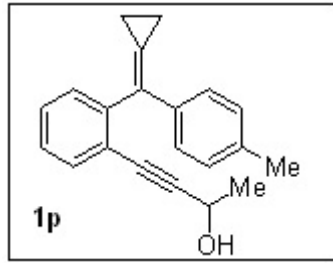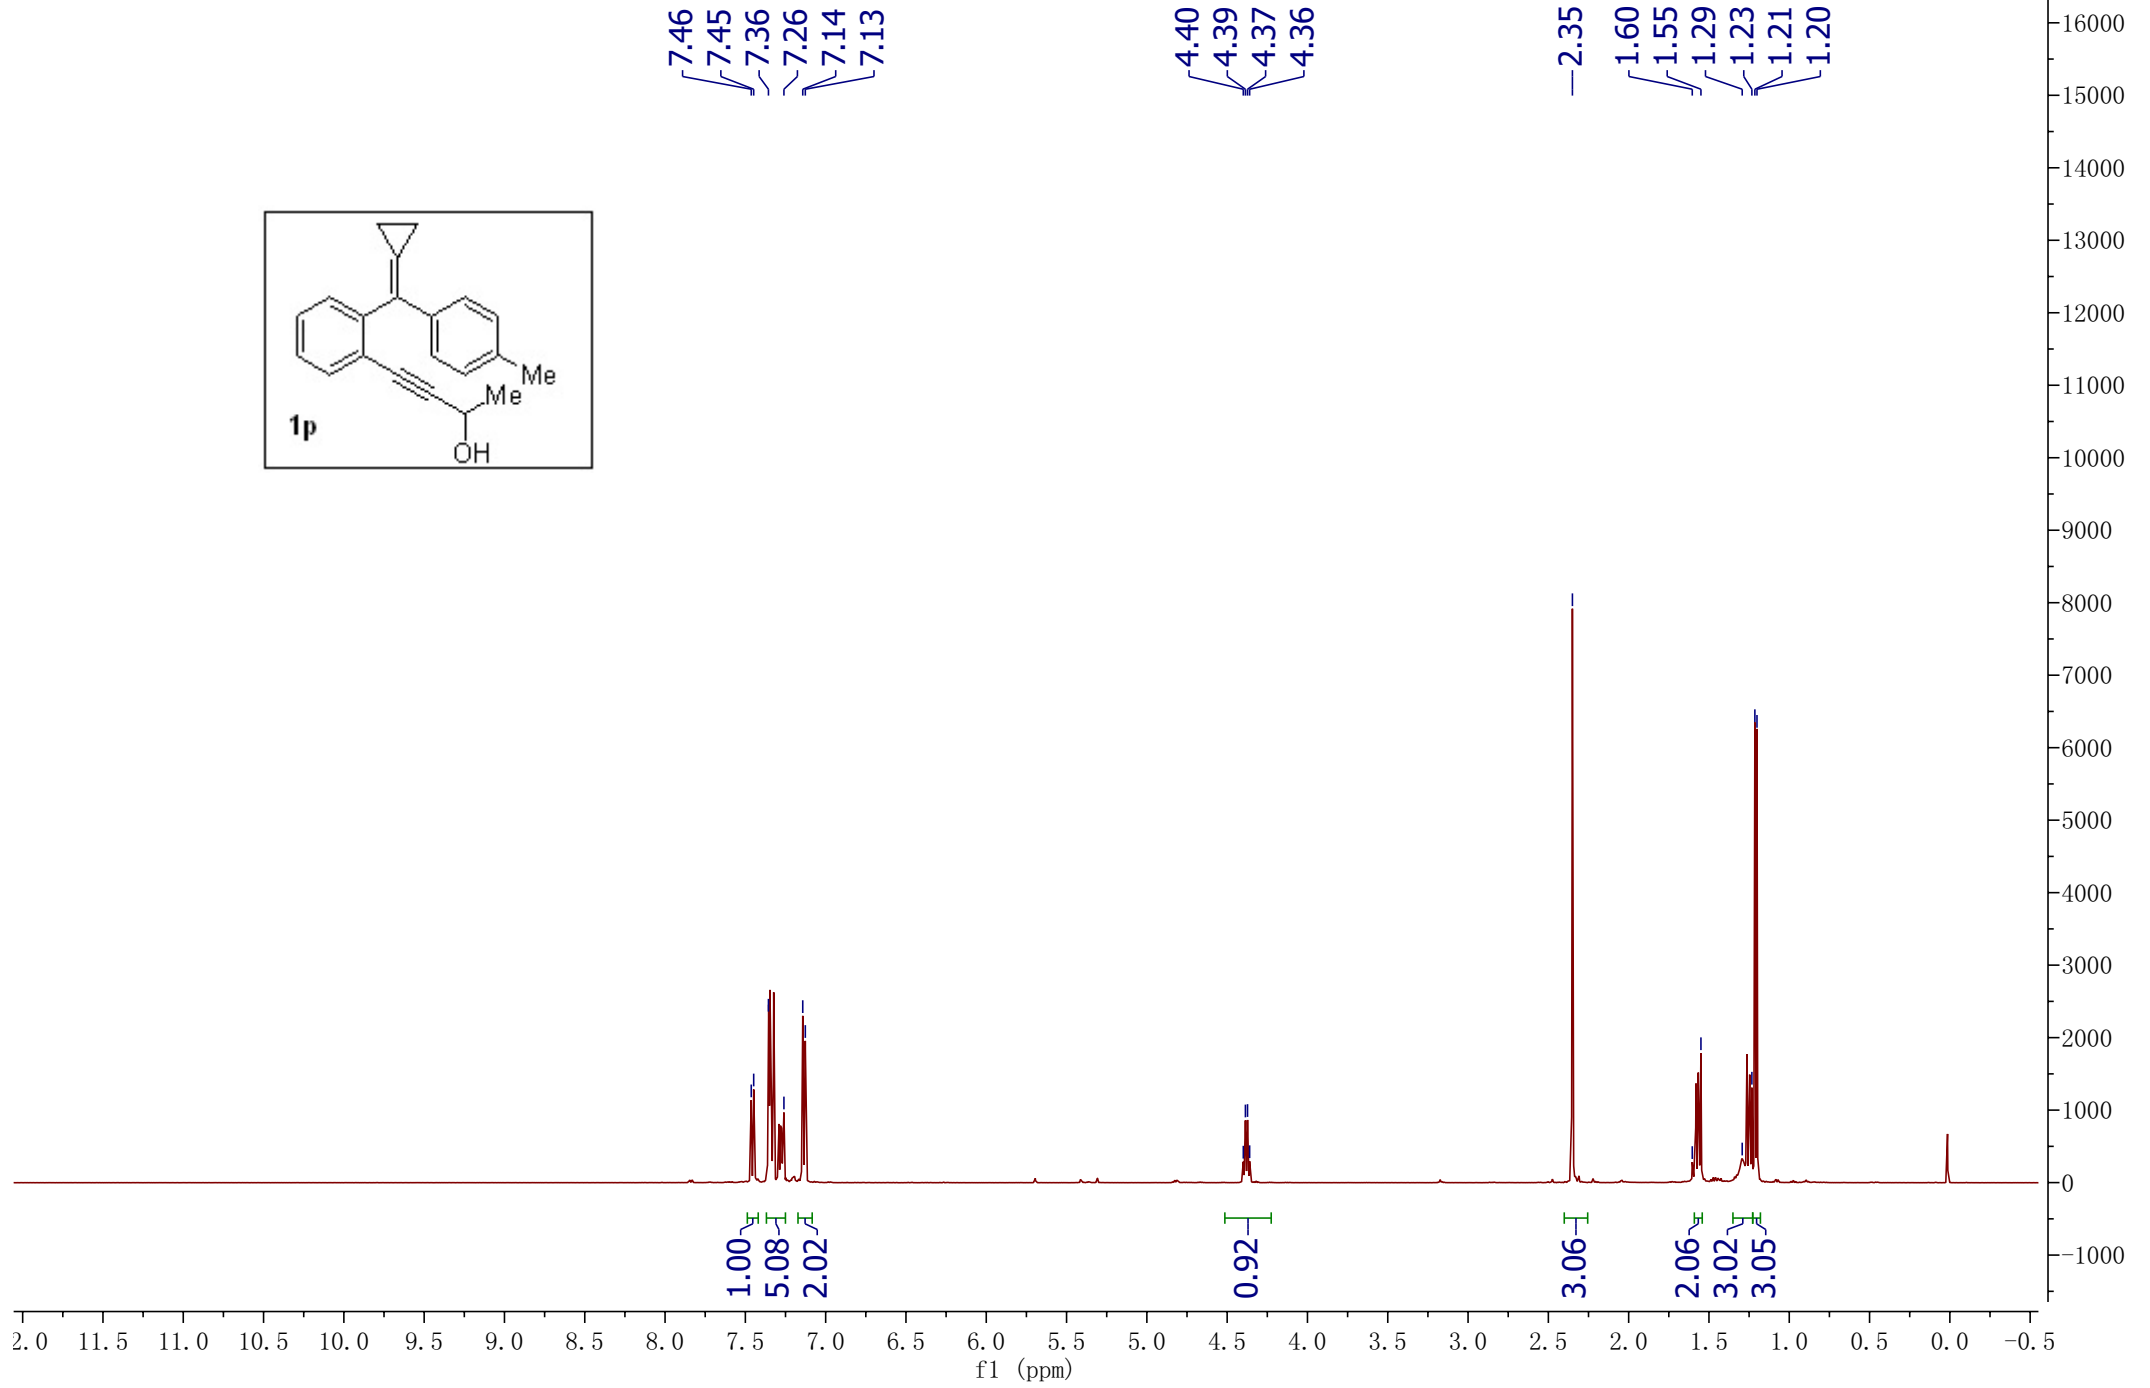



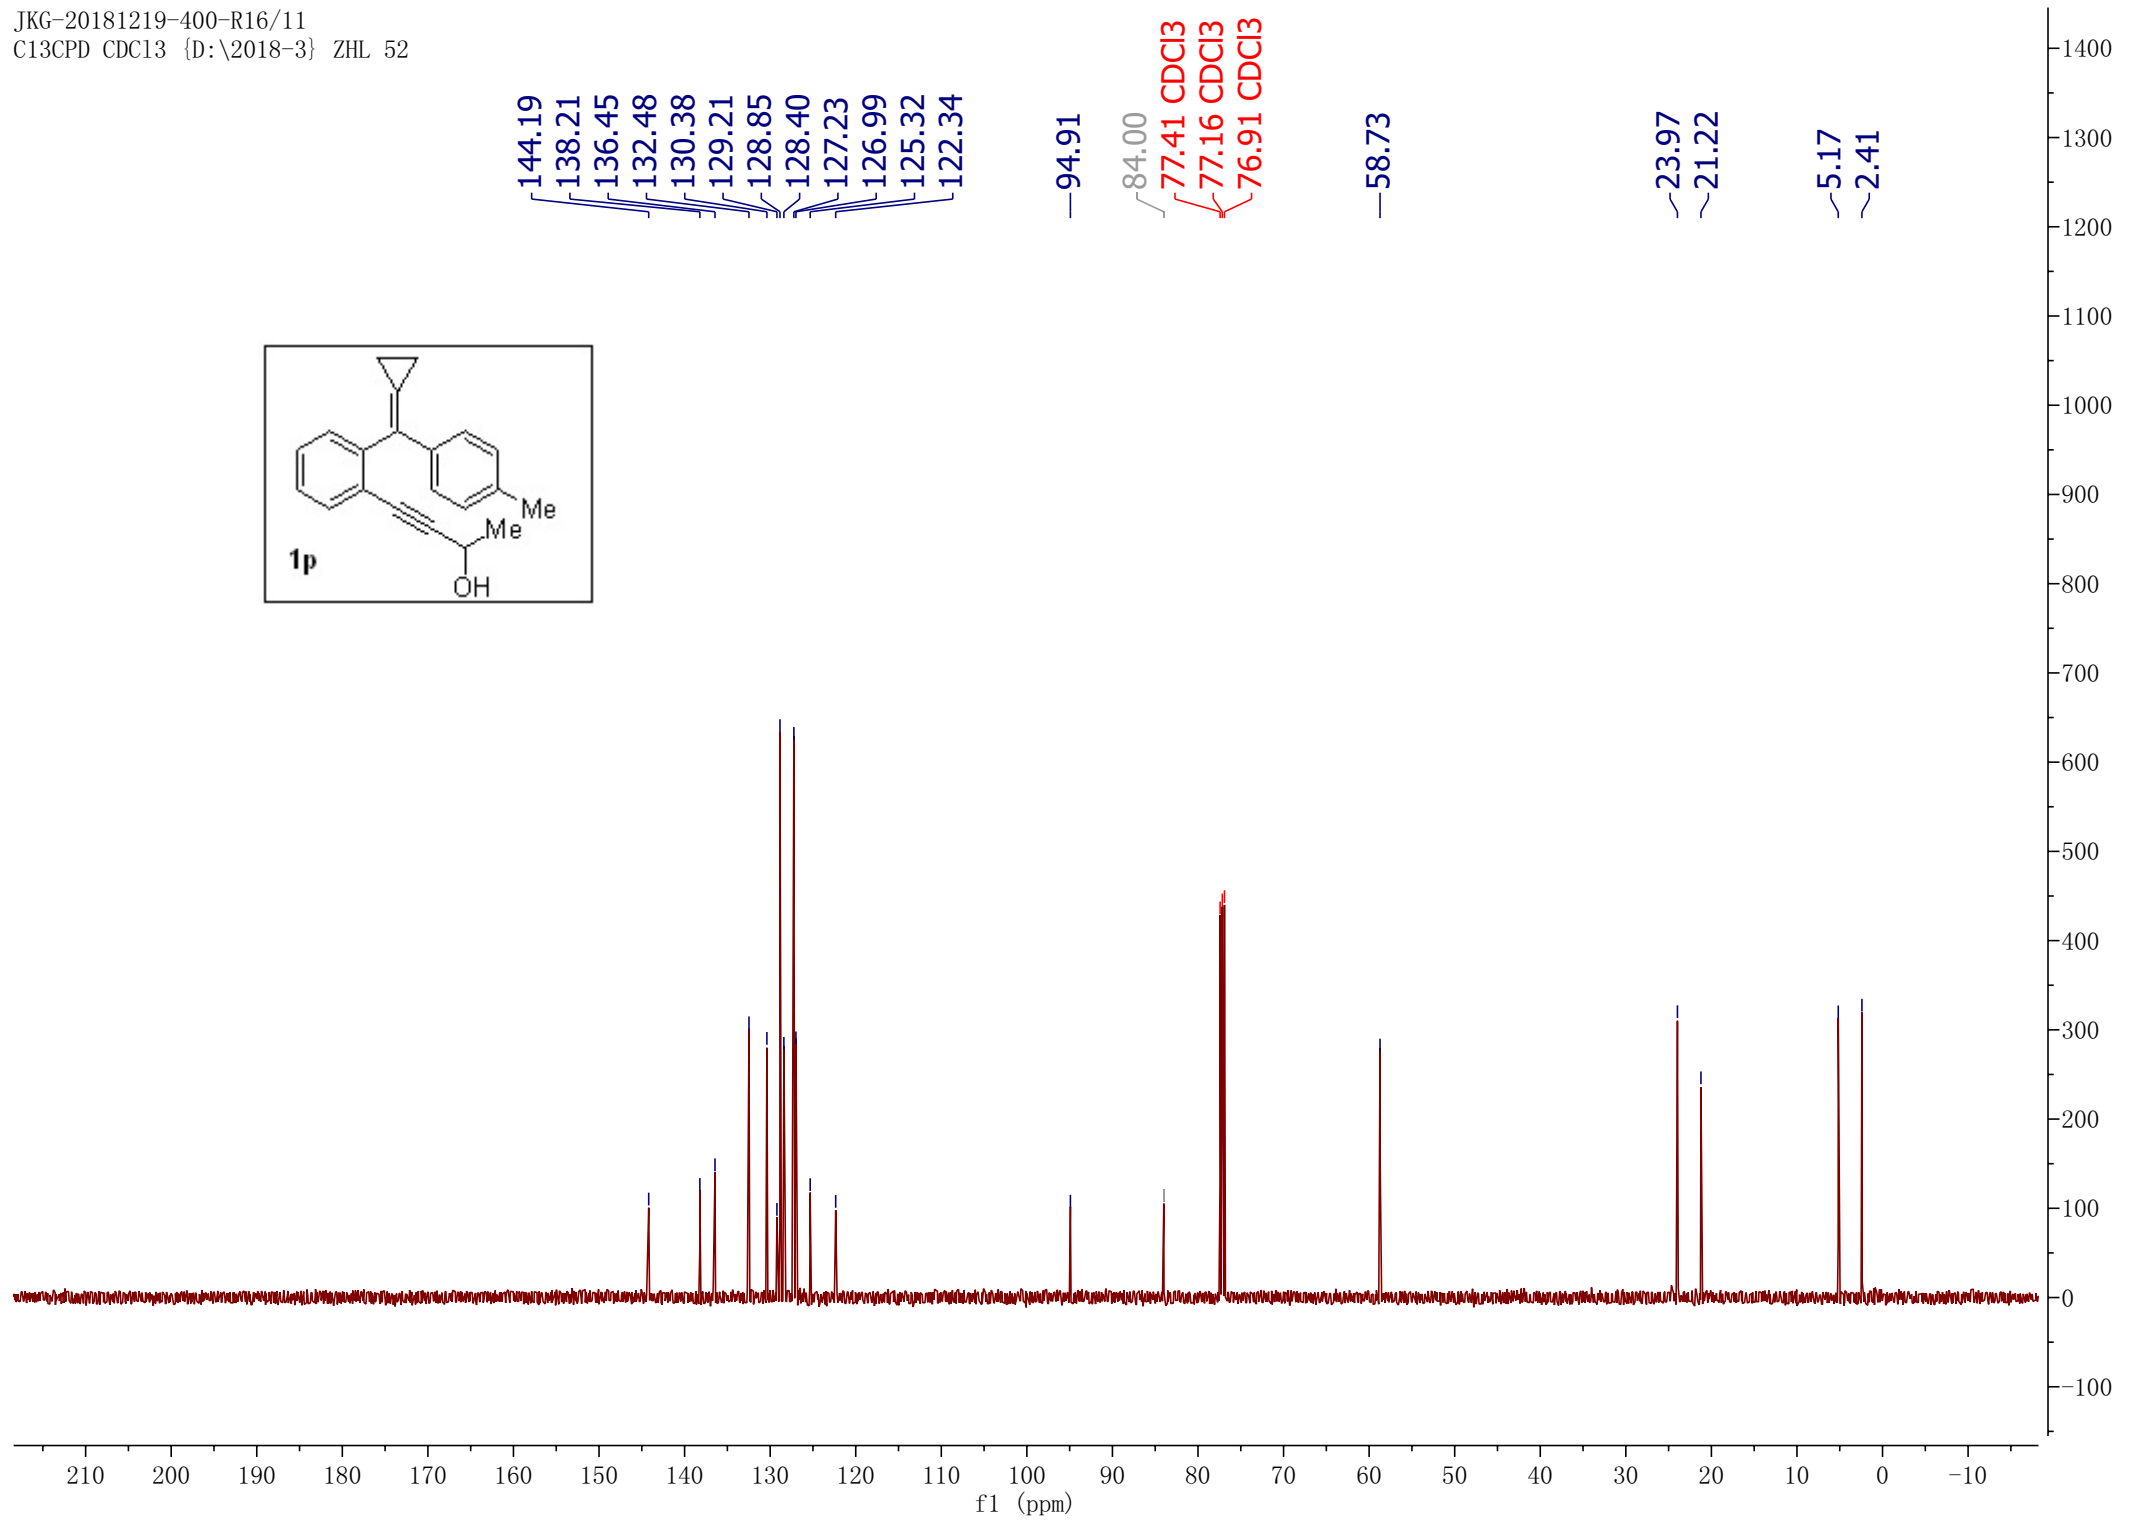

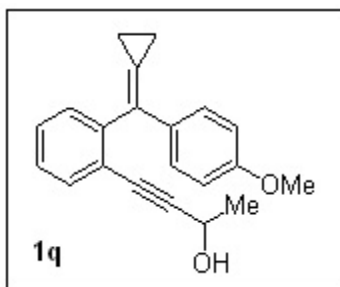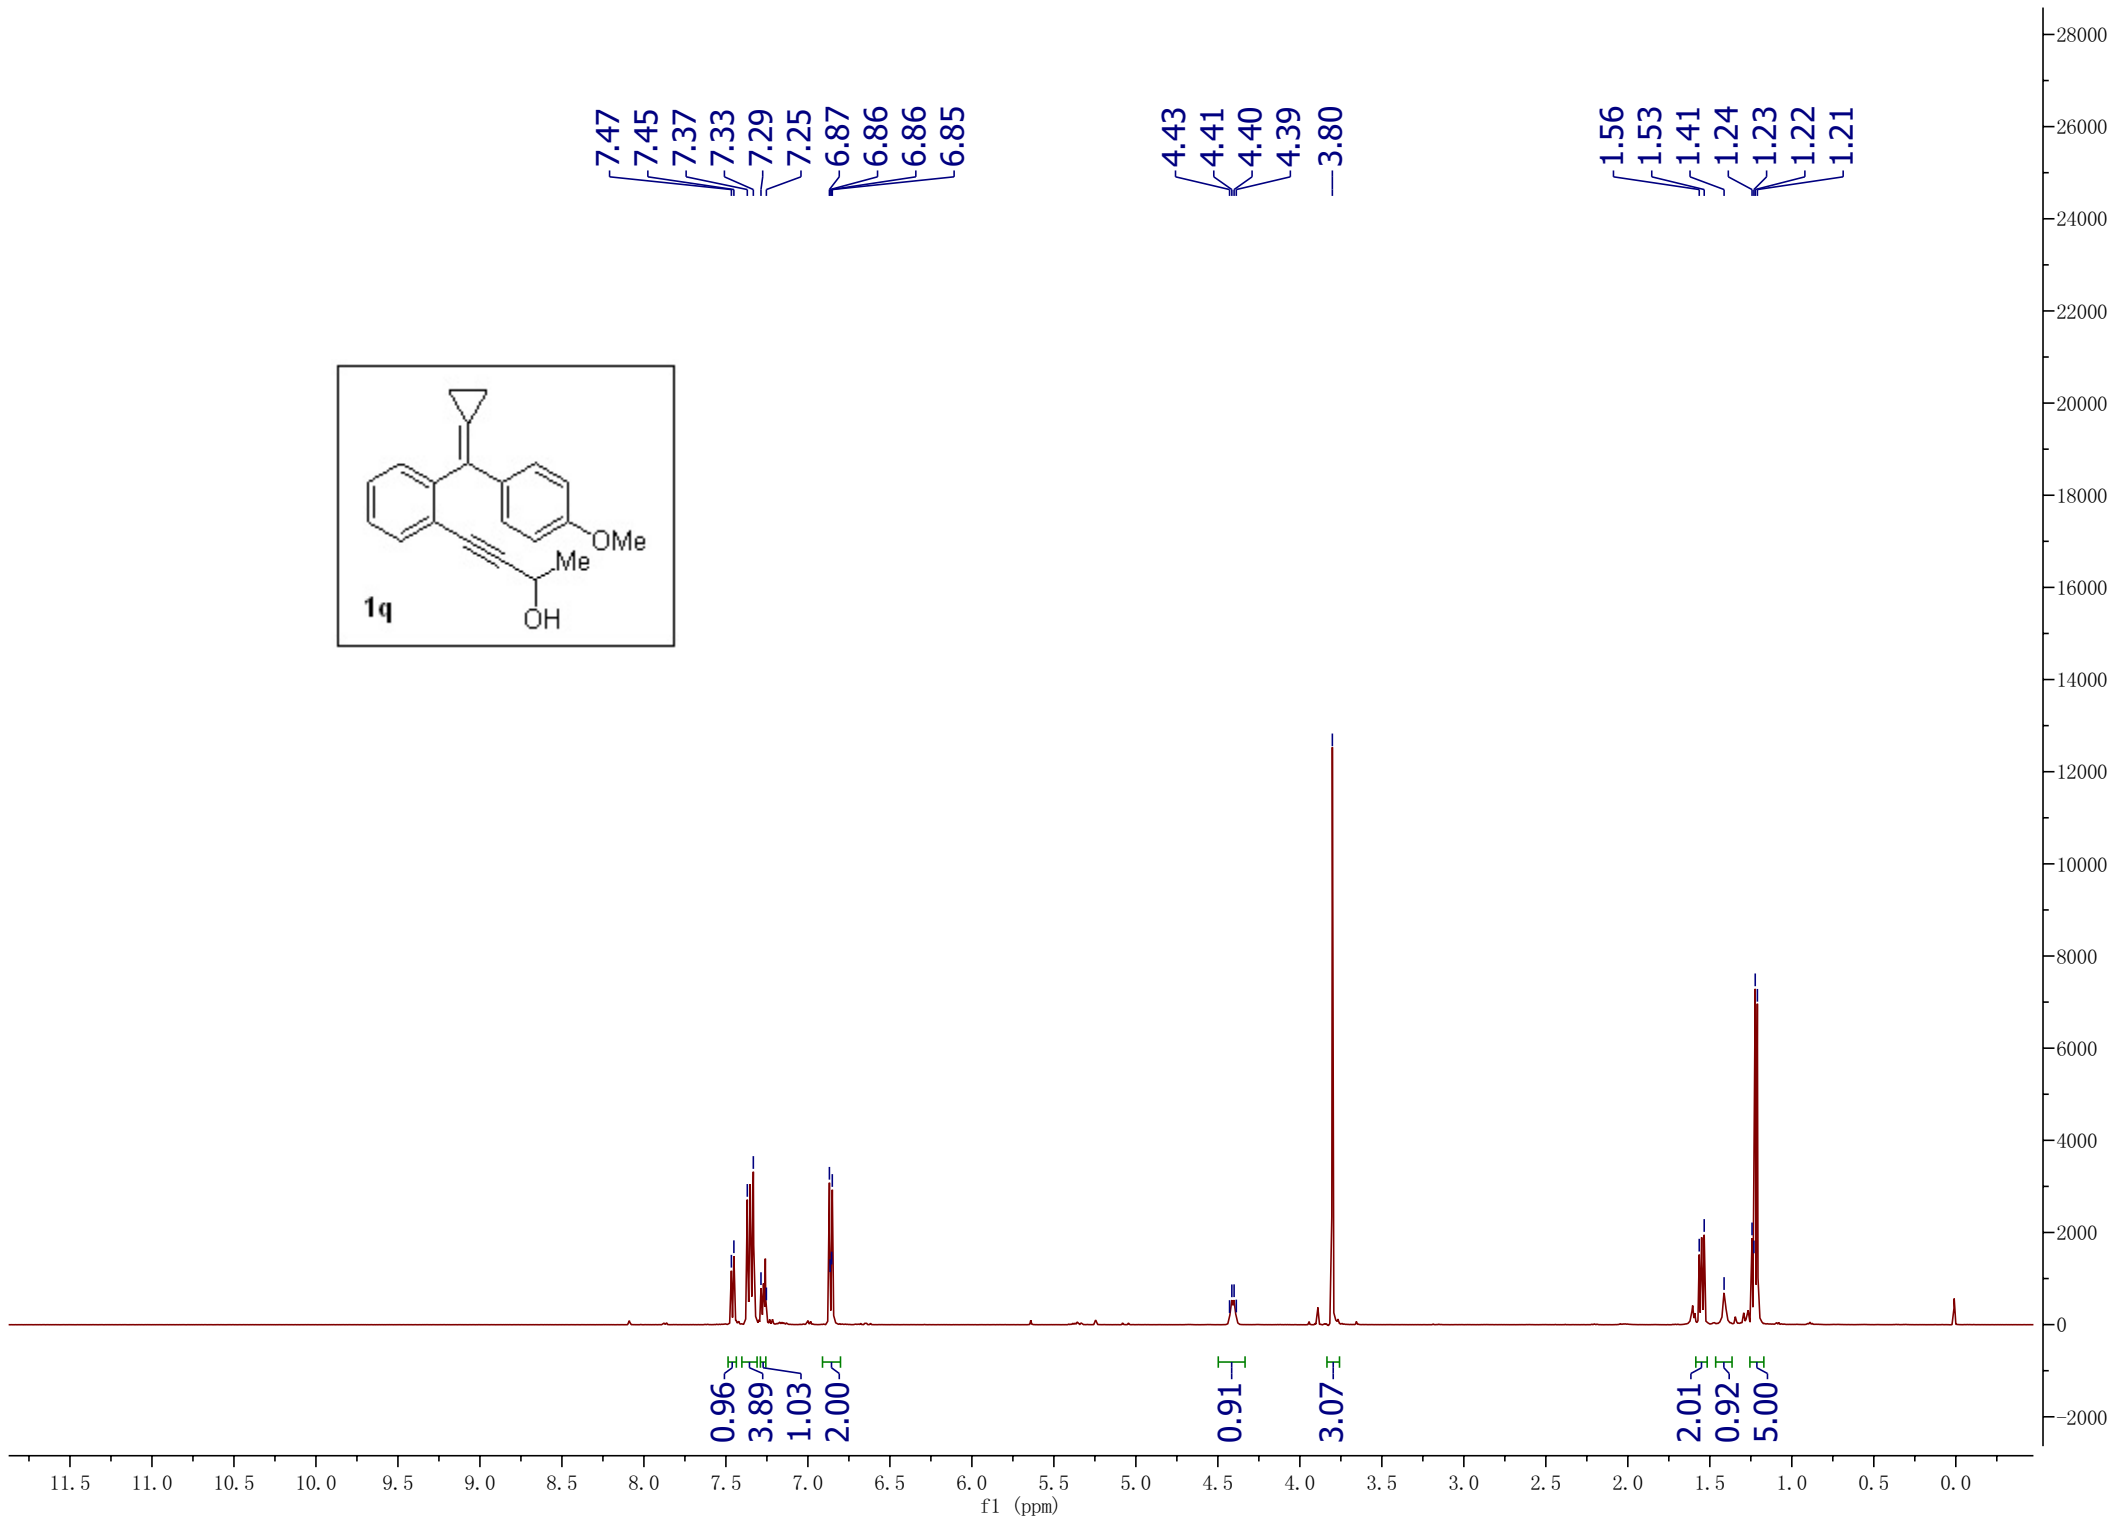

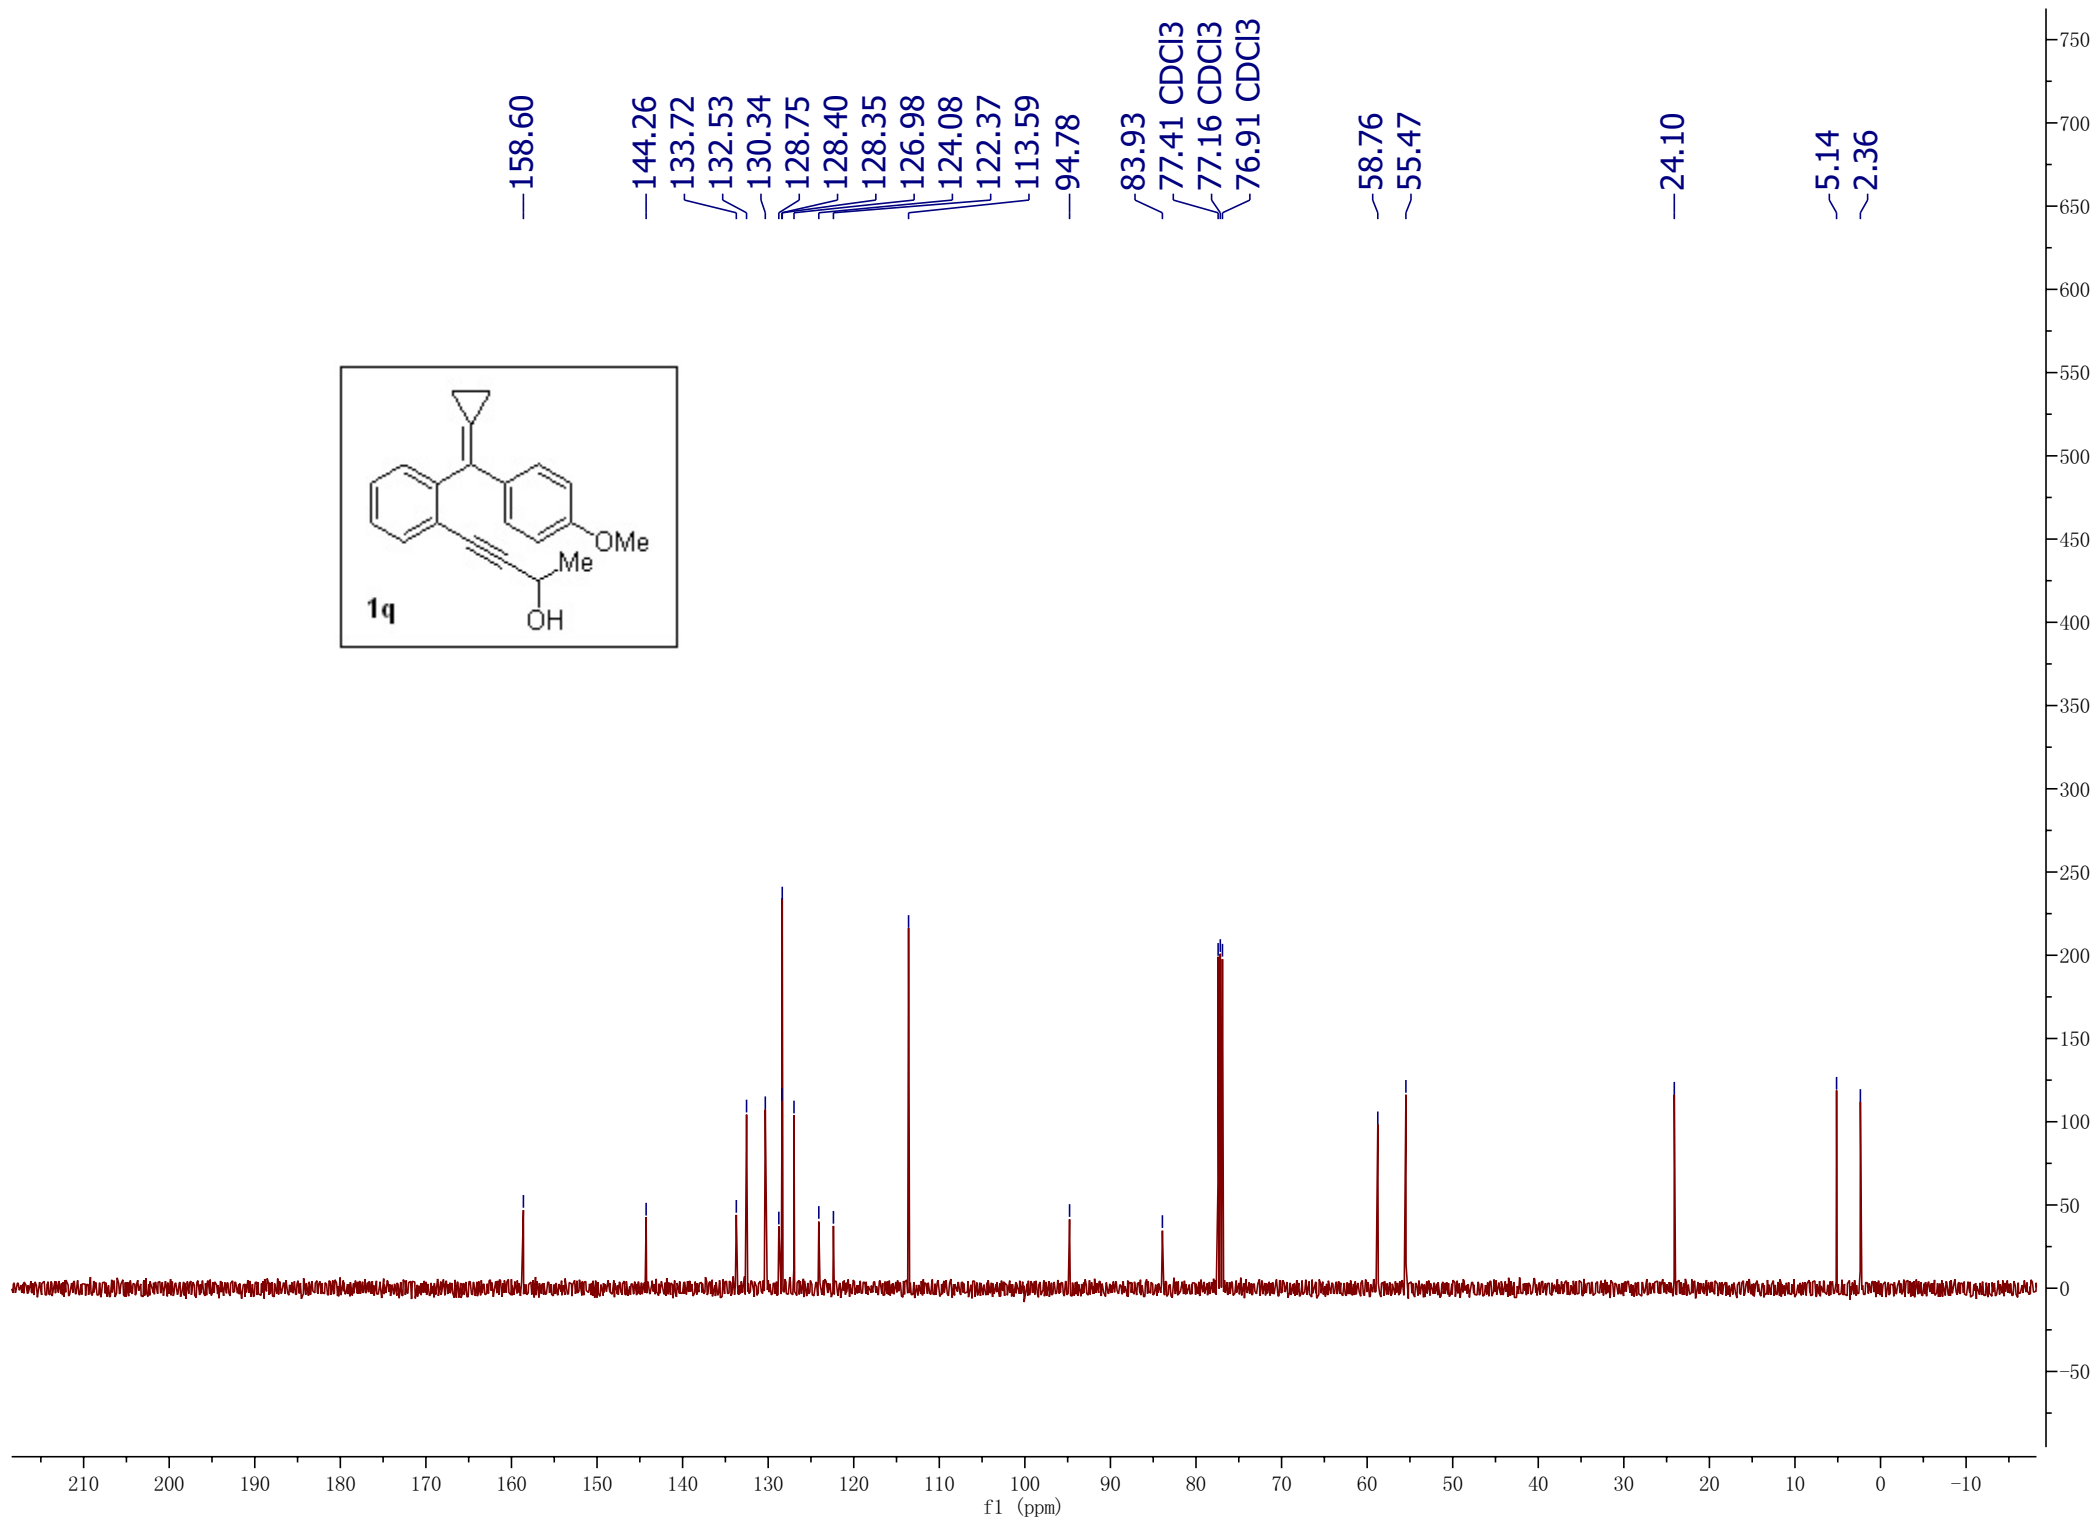

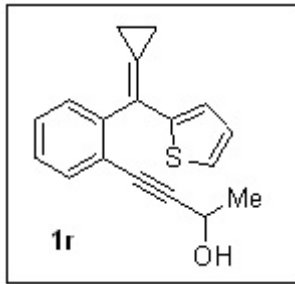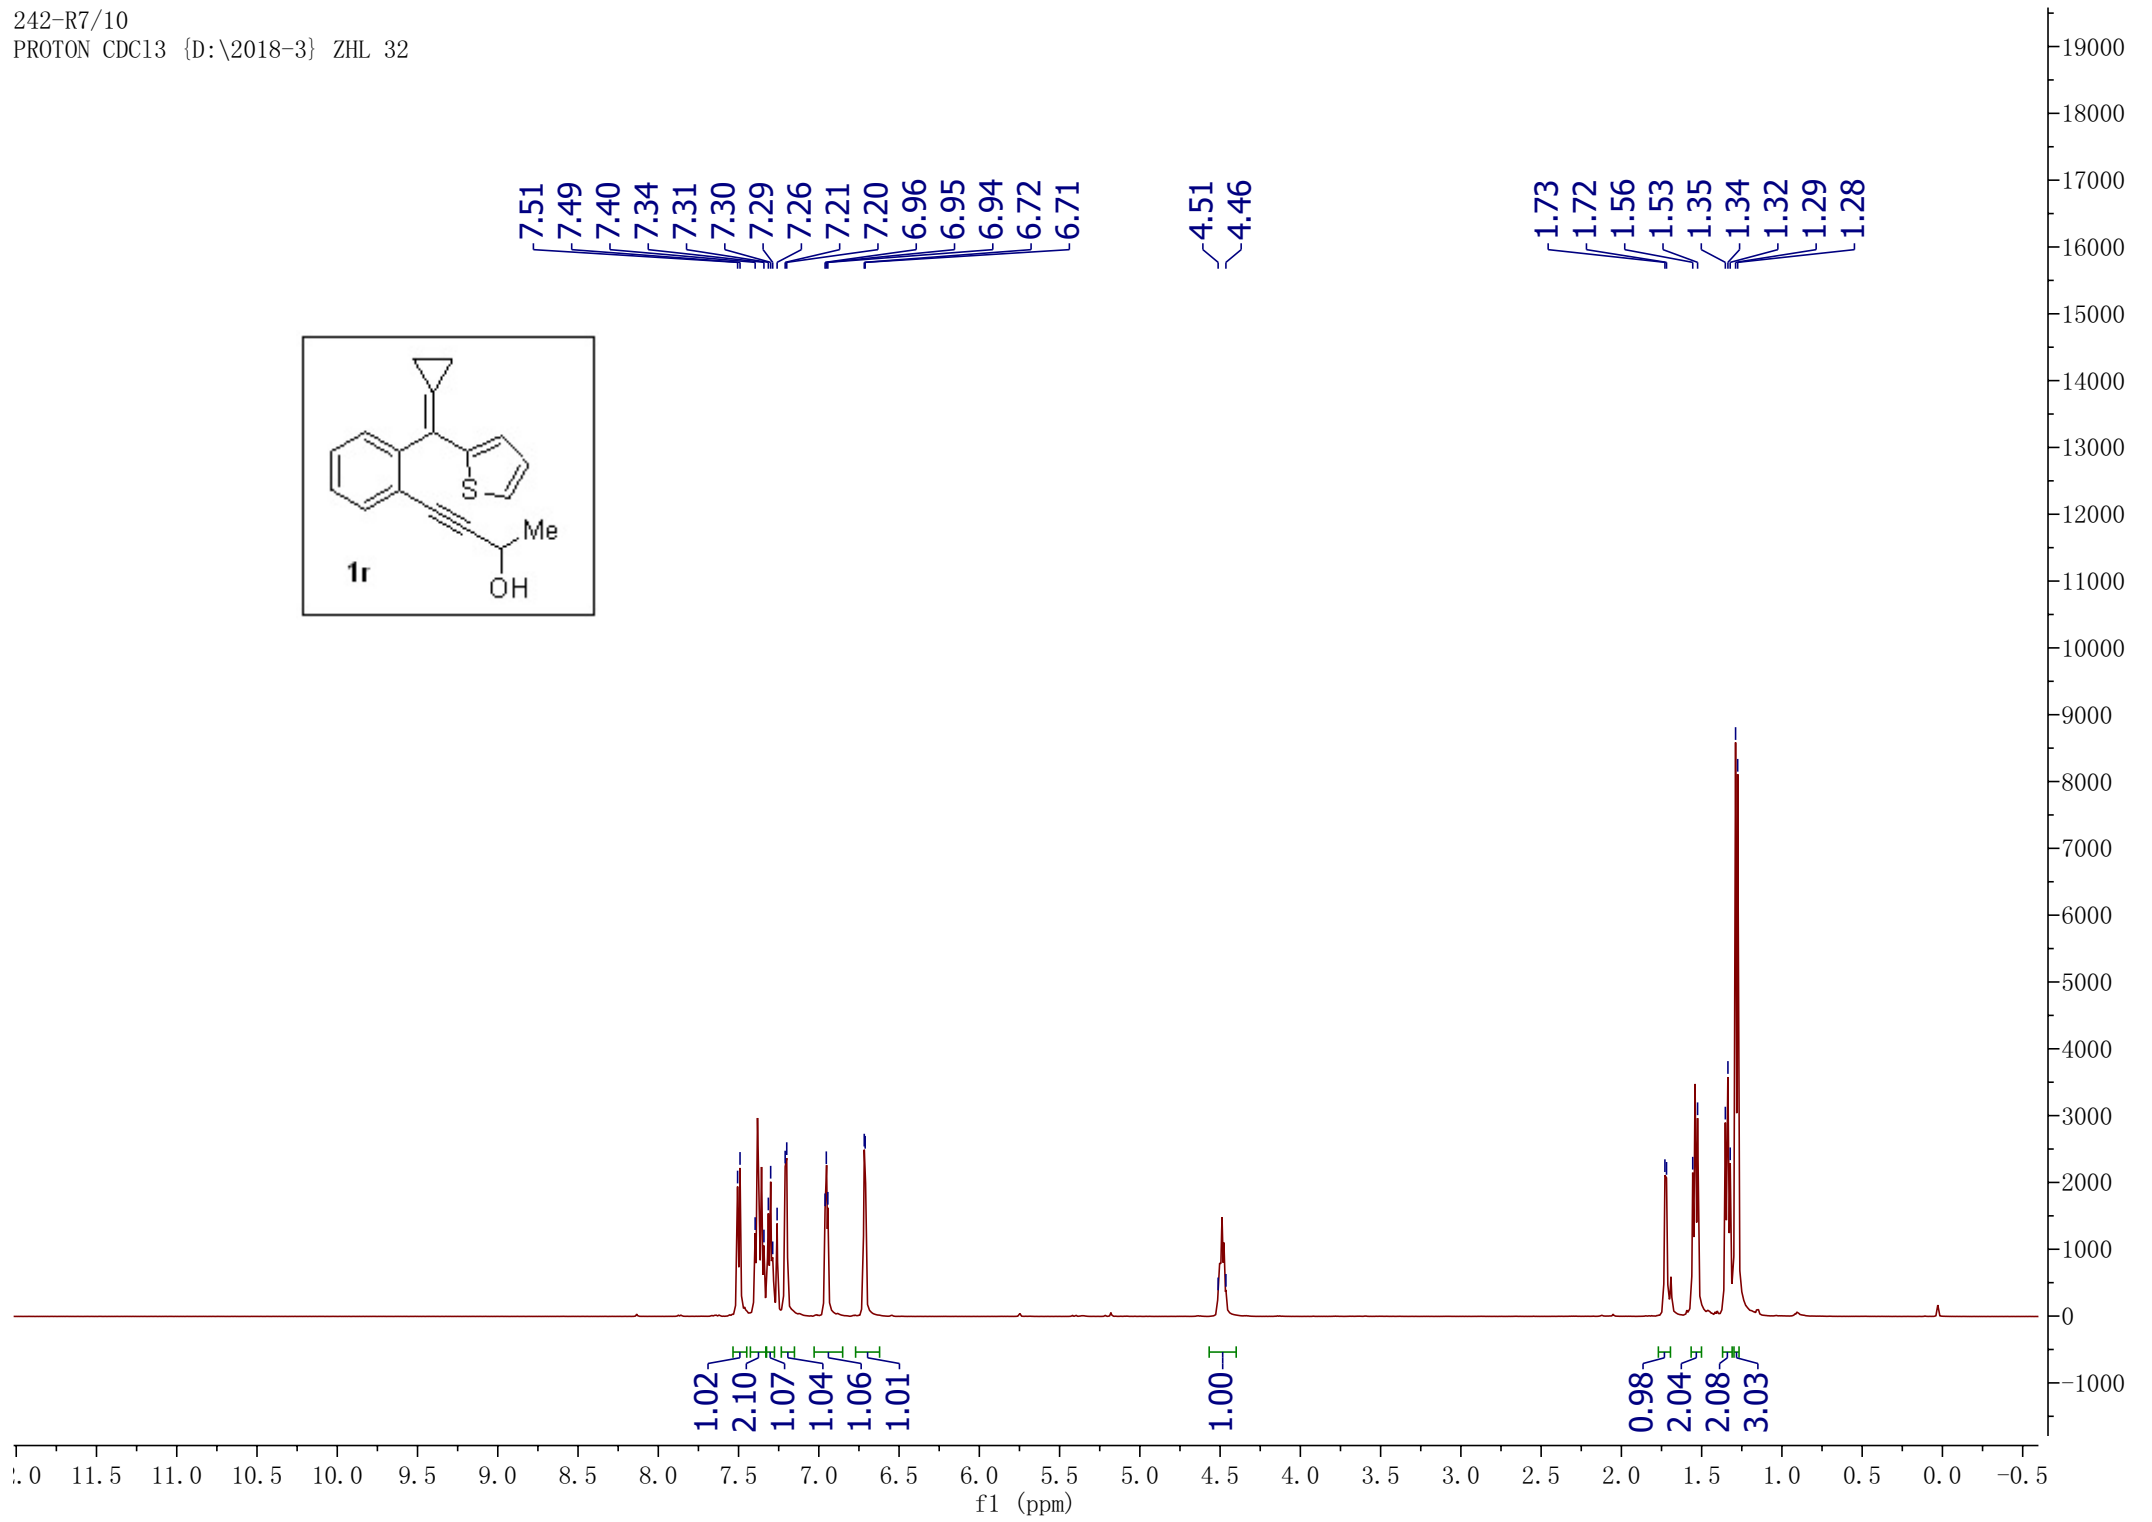

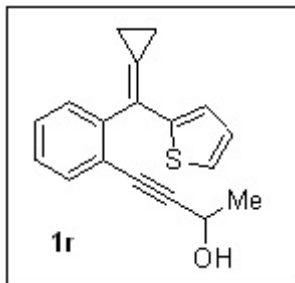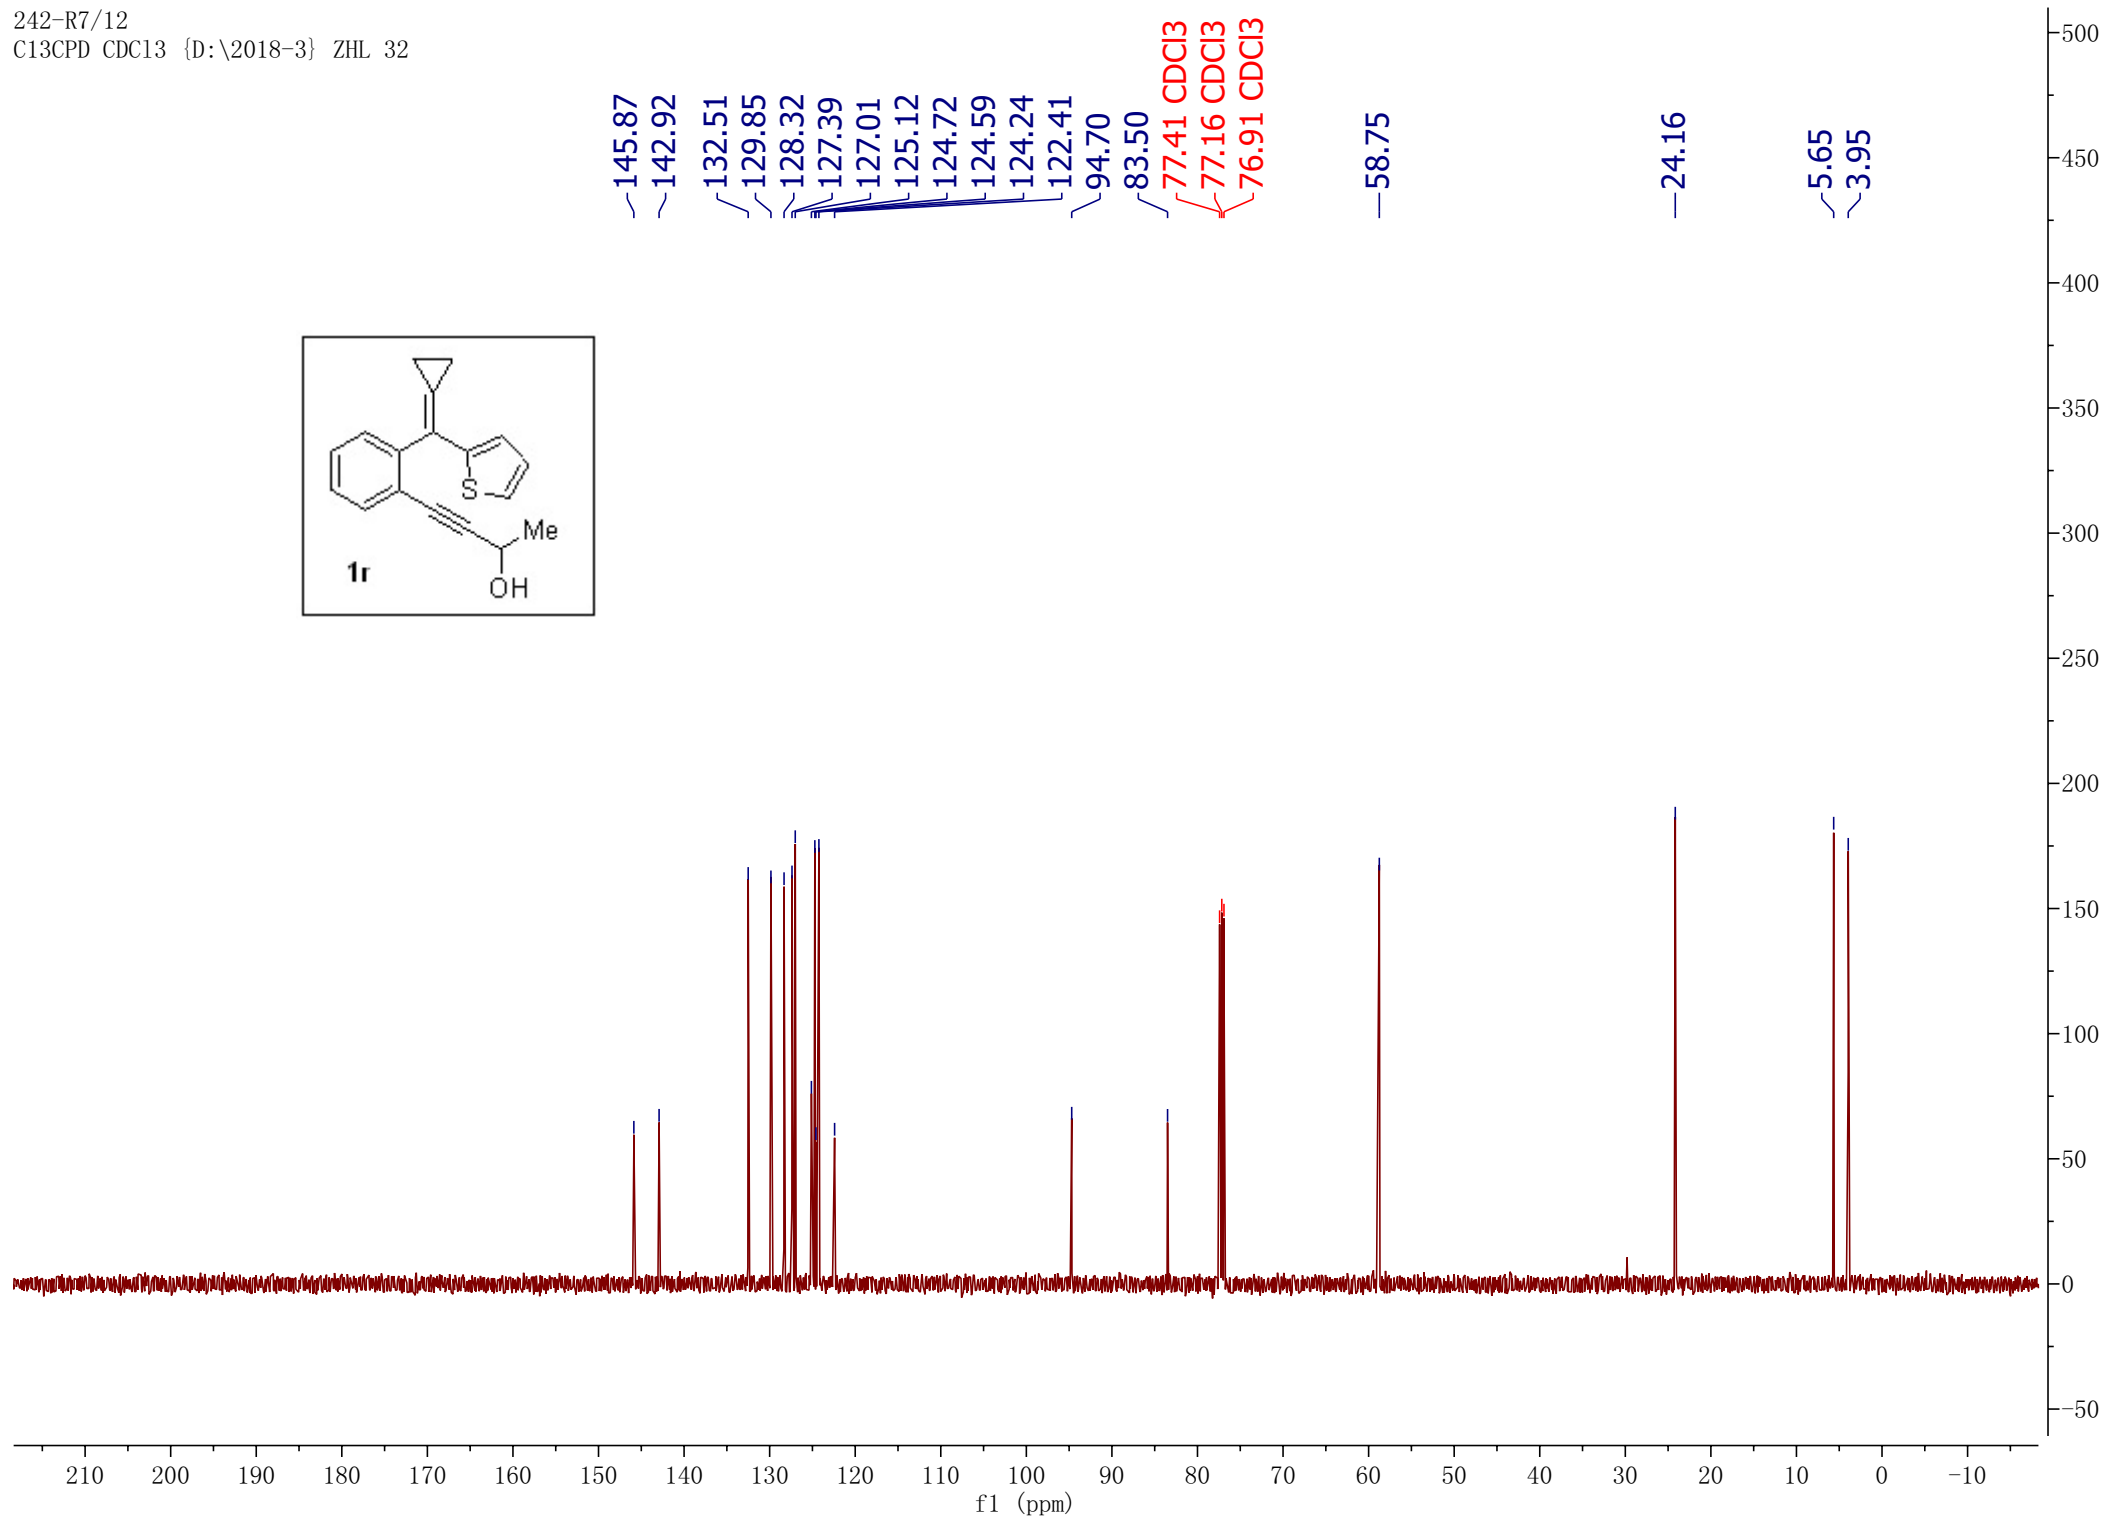

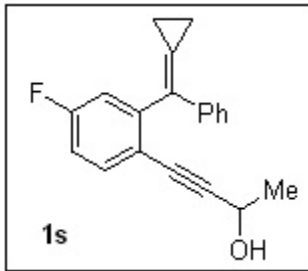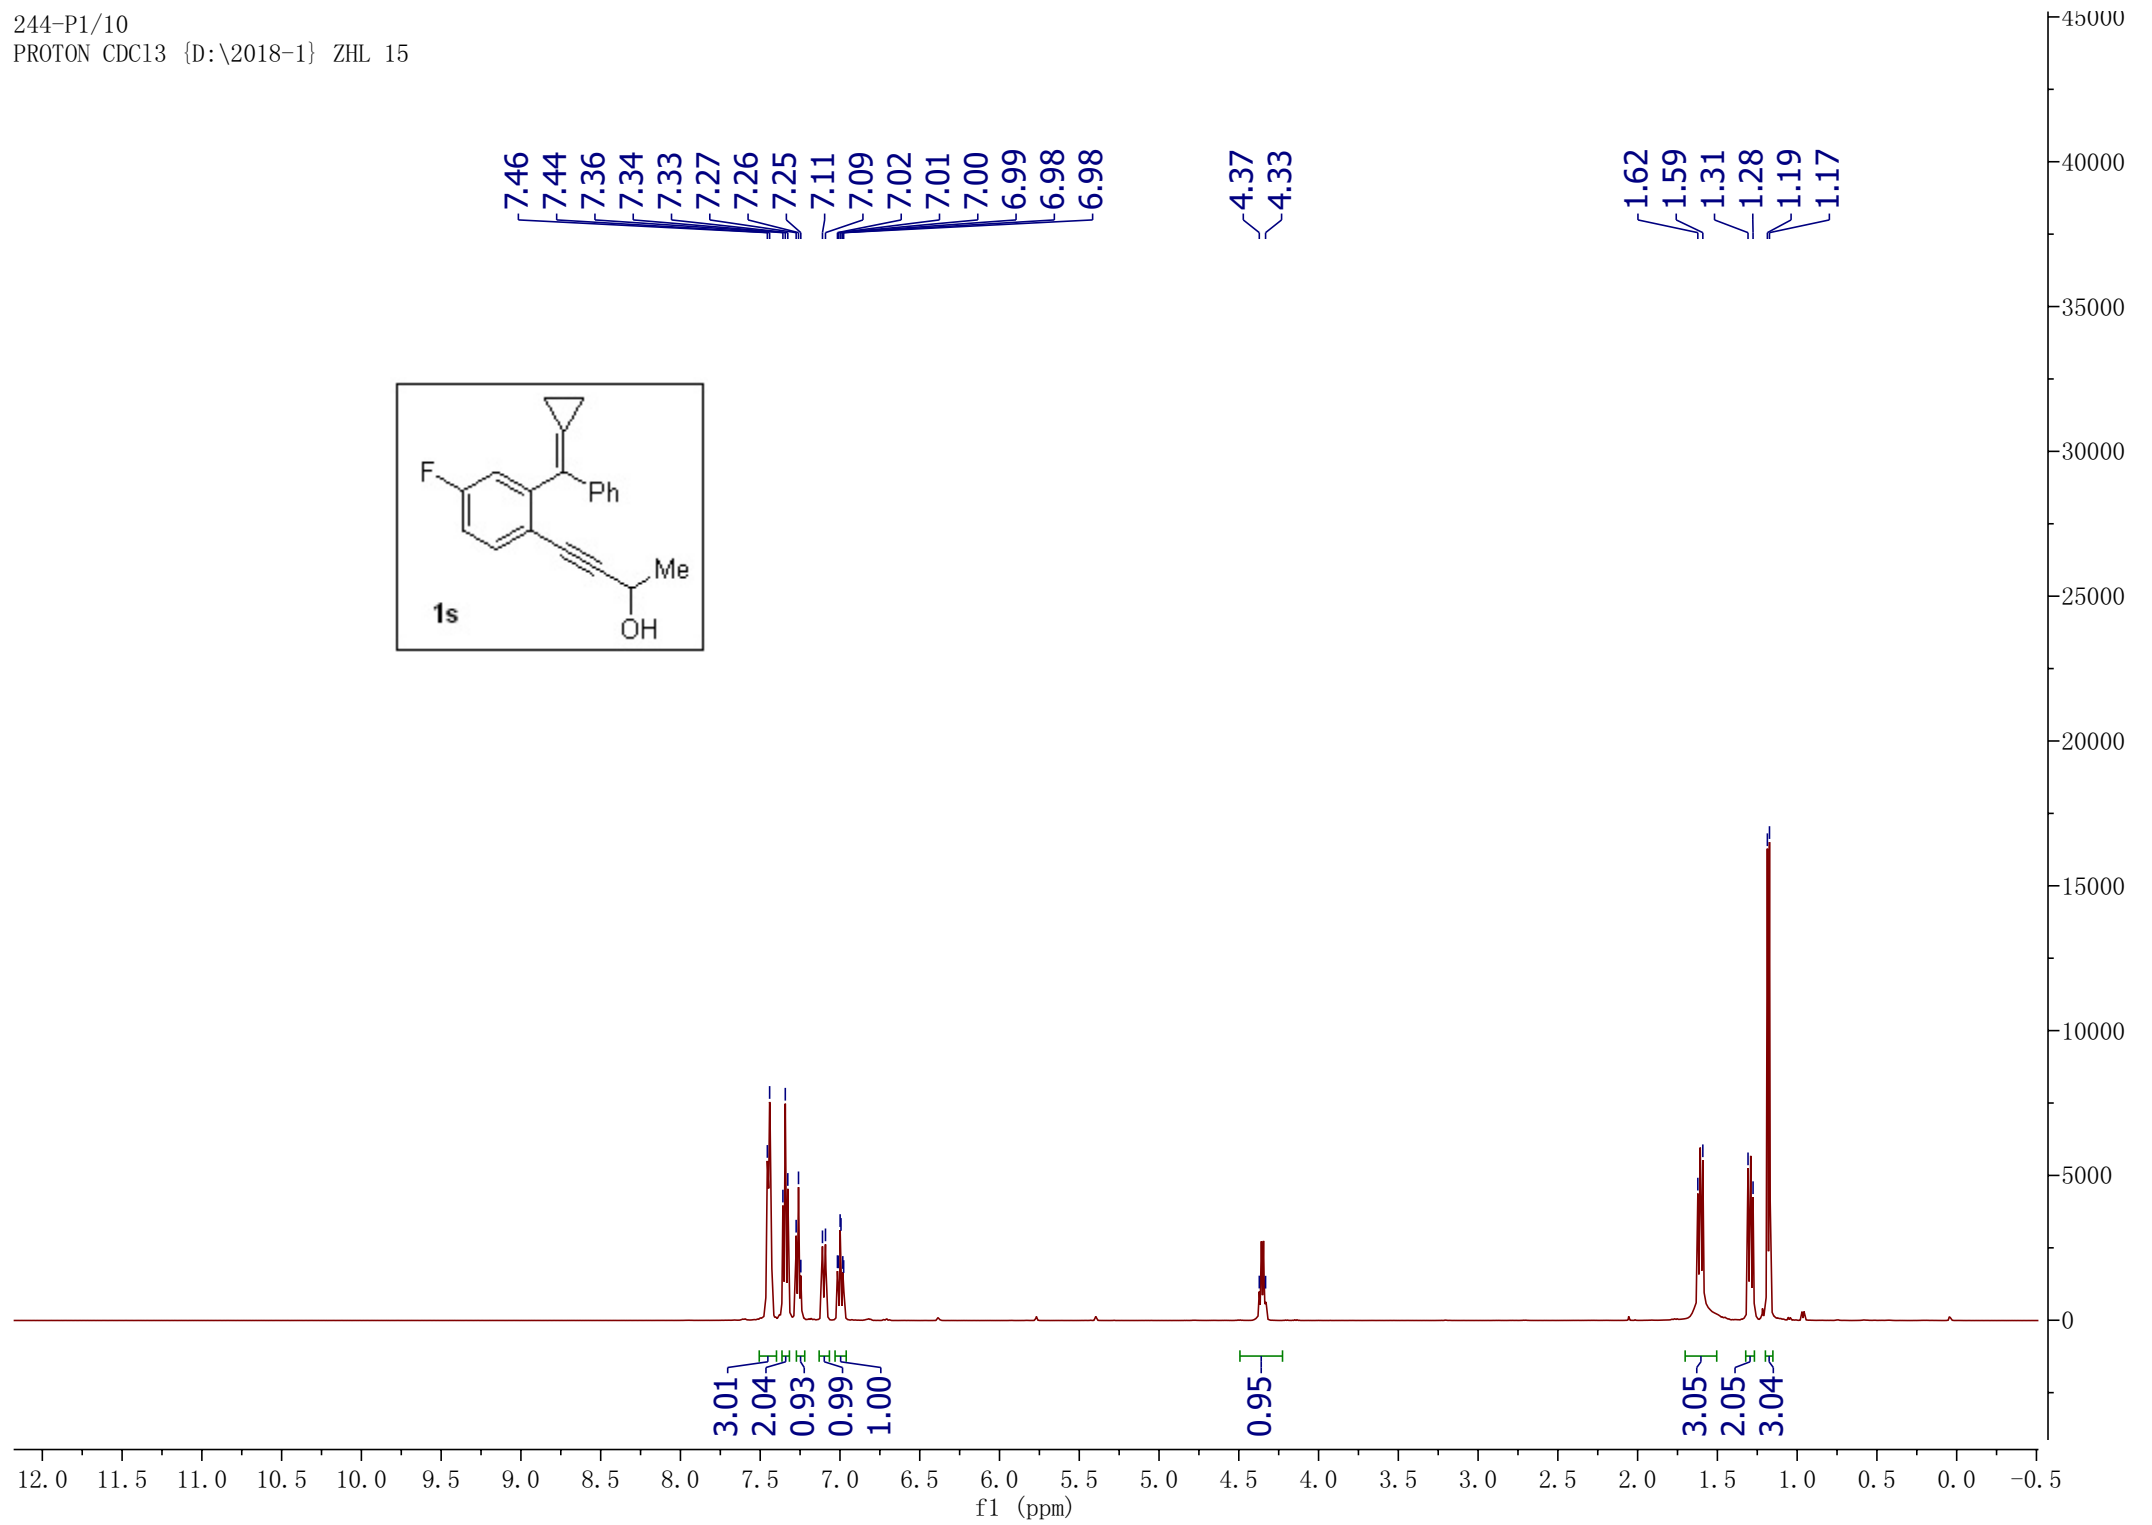

163.36  
161.38  
146.37  
146.31  
140.24  
134.29  
134.22  
128.62  
128.60  
128.21  
127.17  
127.15  
126.83  
118.50  
117.42  
117.24  
114.40  
114.23

82.75  
77.42 CDC13  
77.16 CDC13  
76.91 CDC13

58.50

23.86

5.23  
2.43

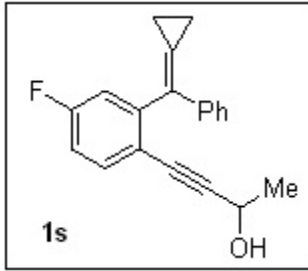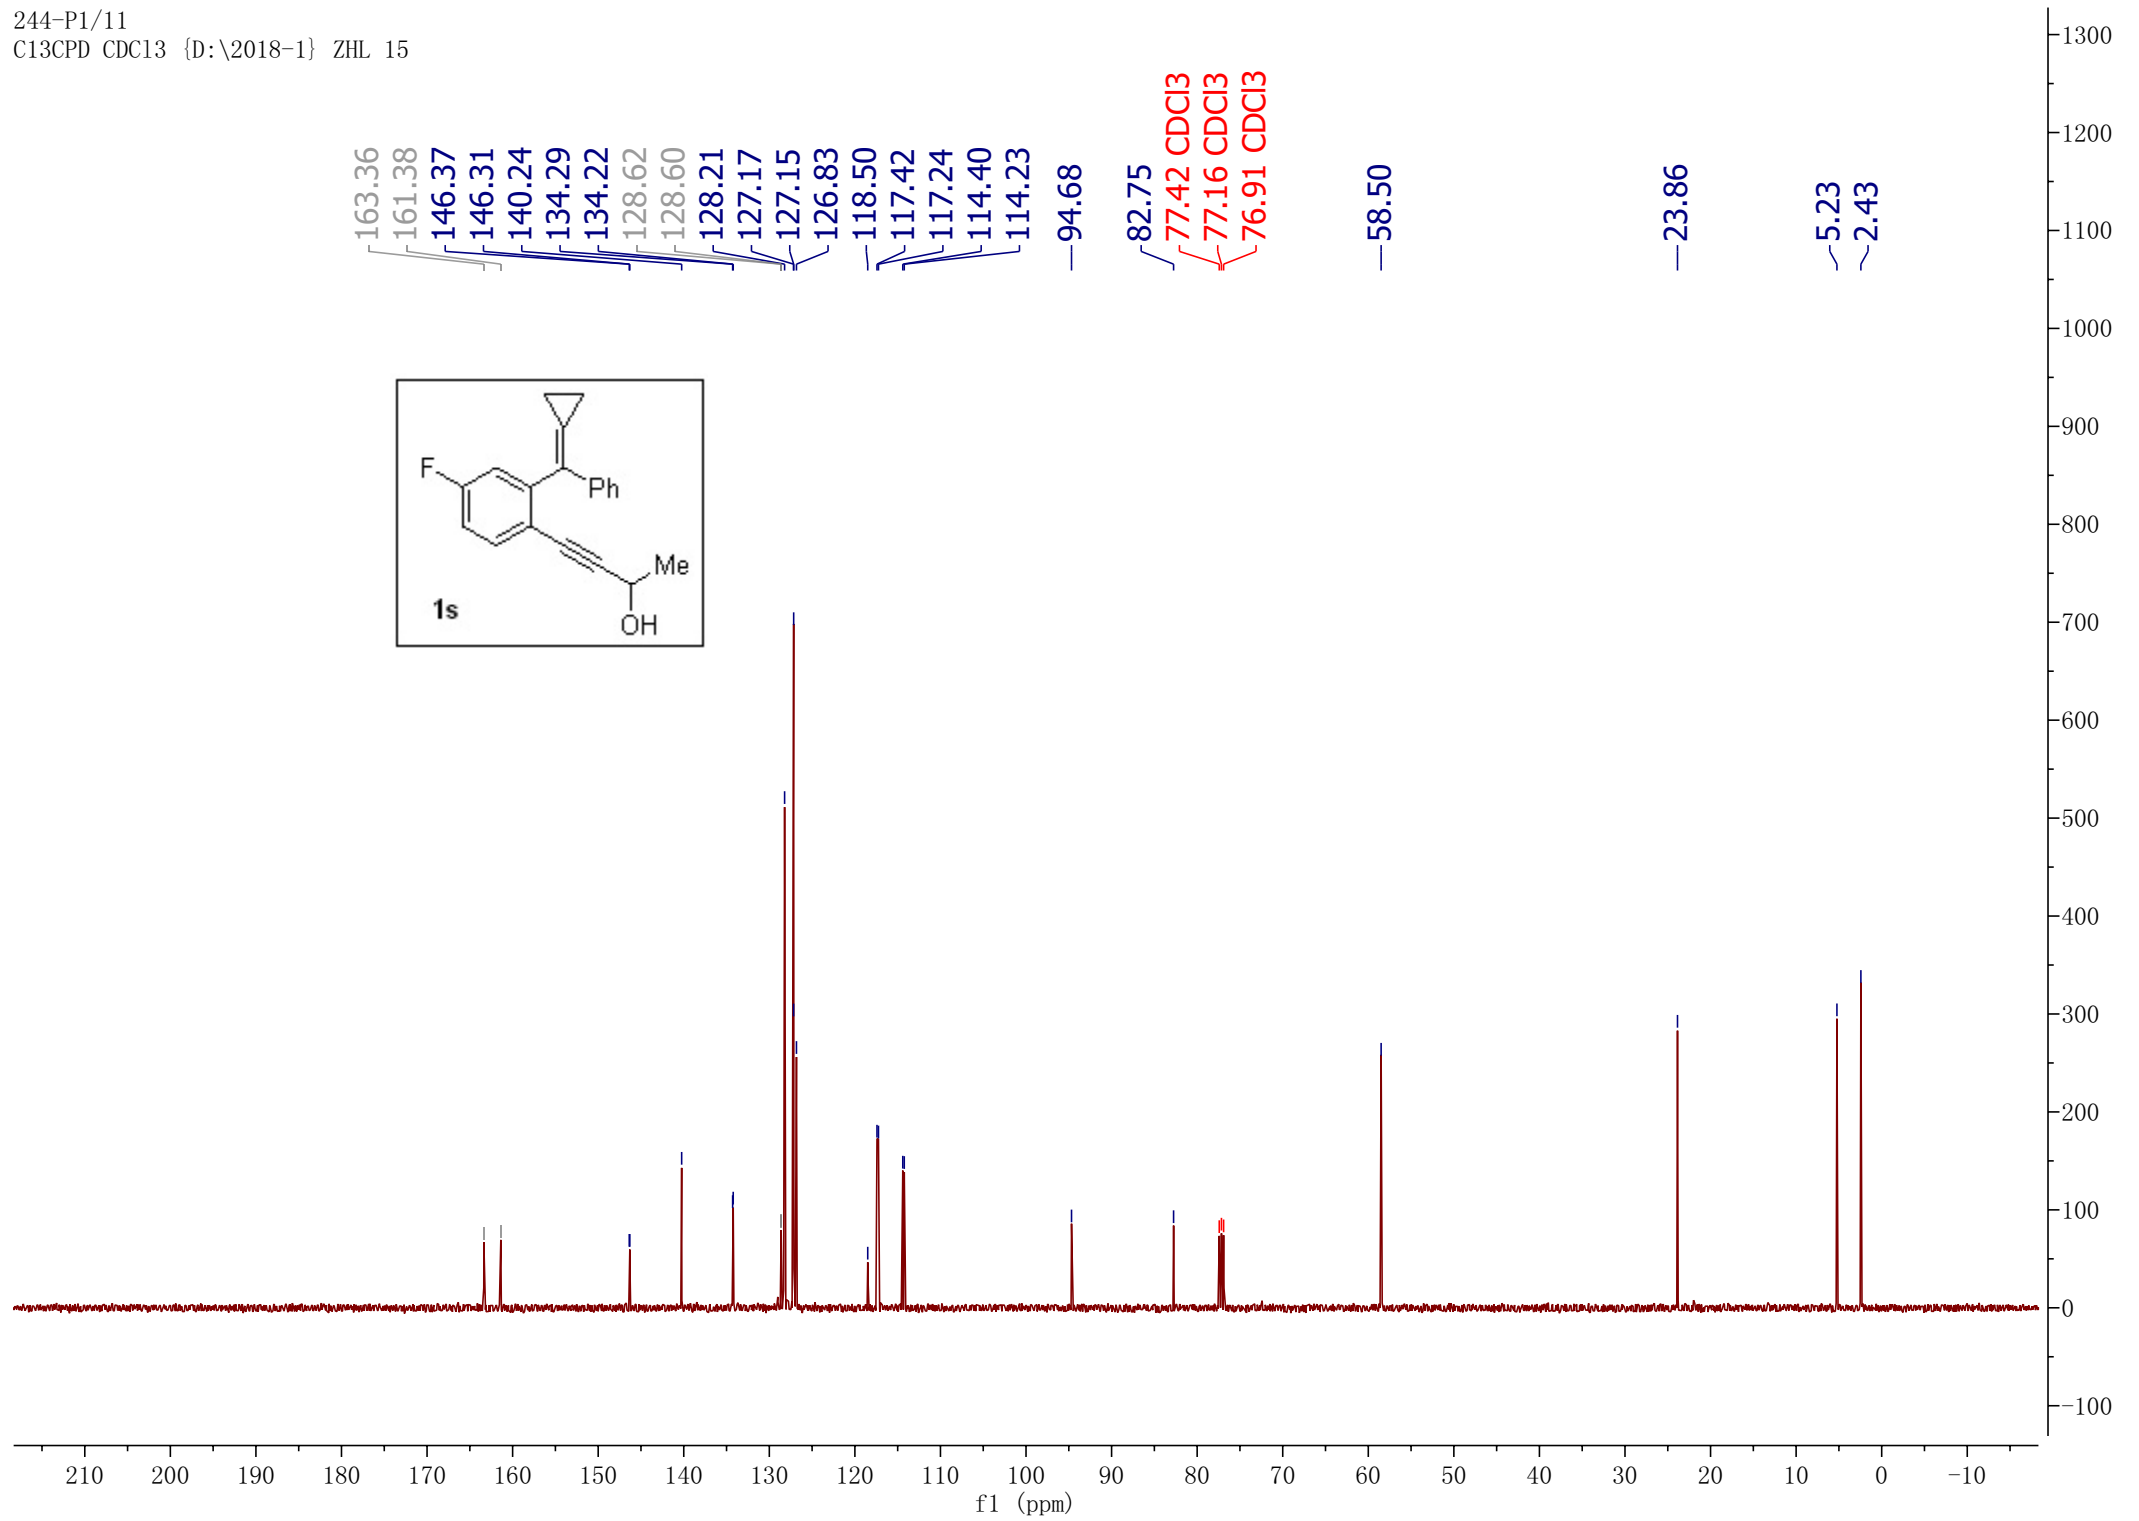

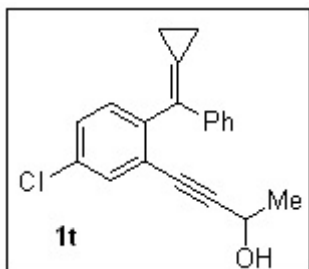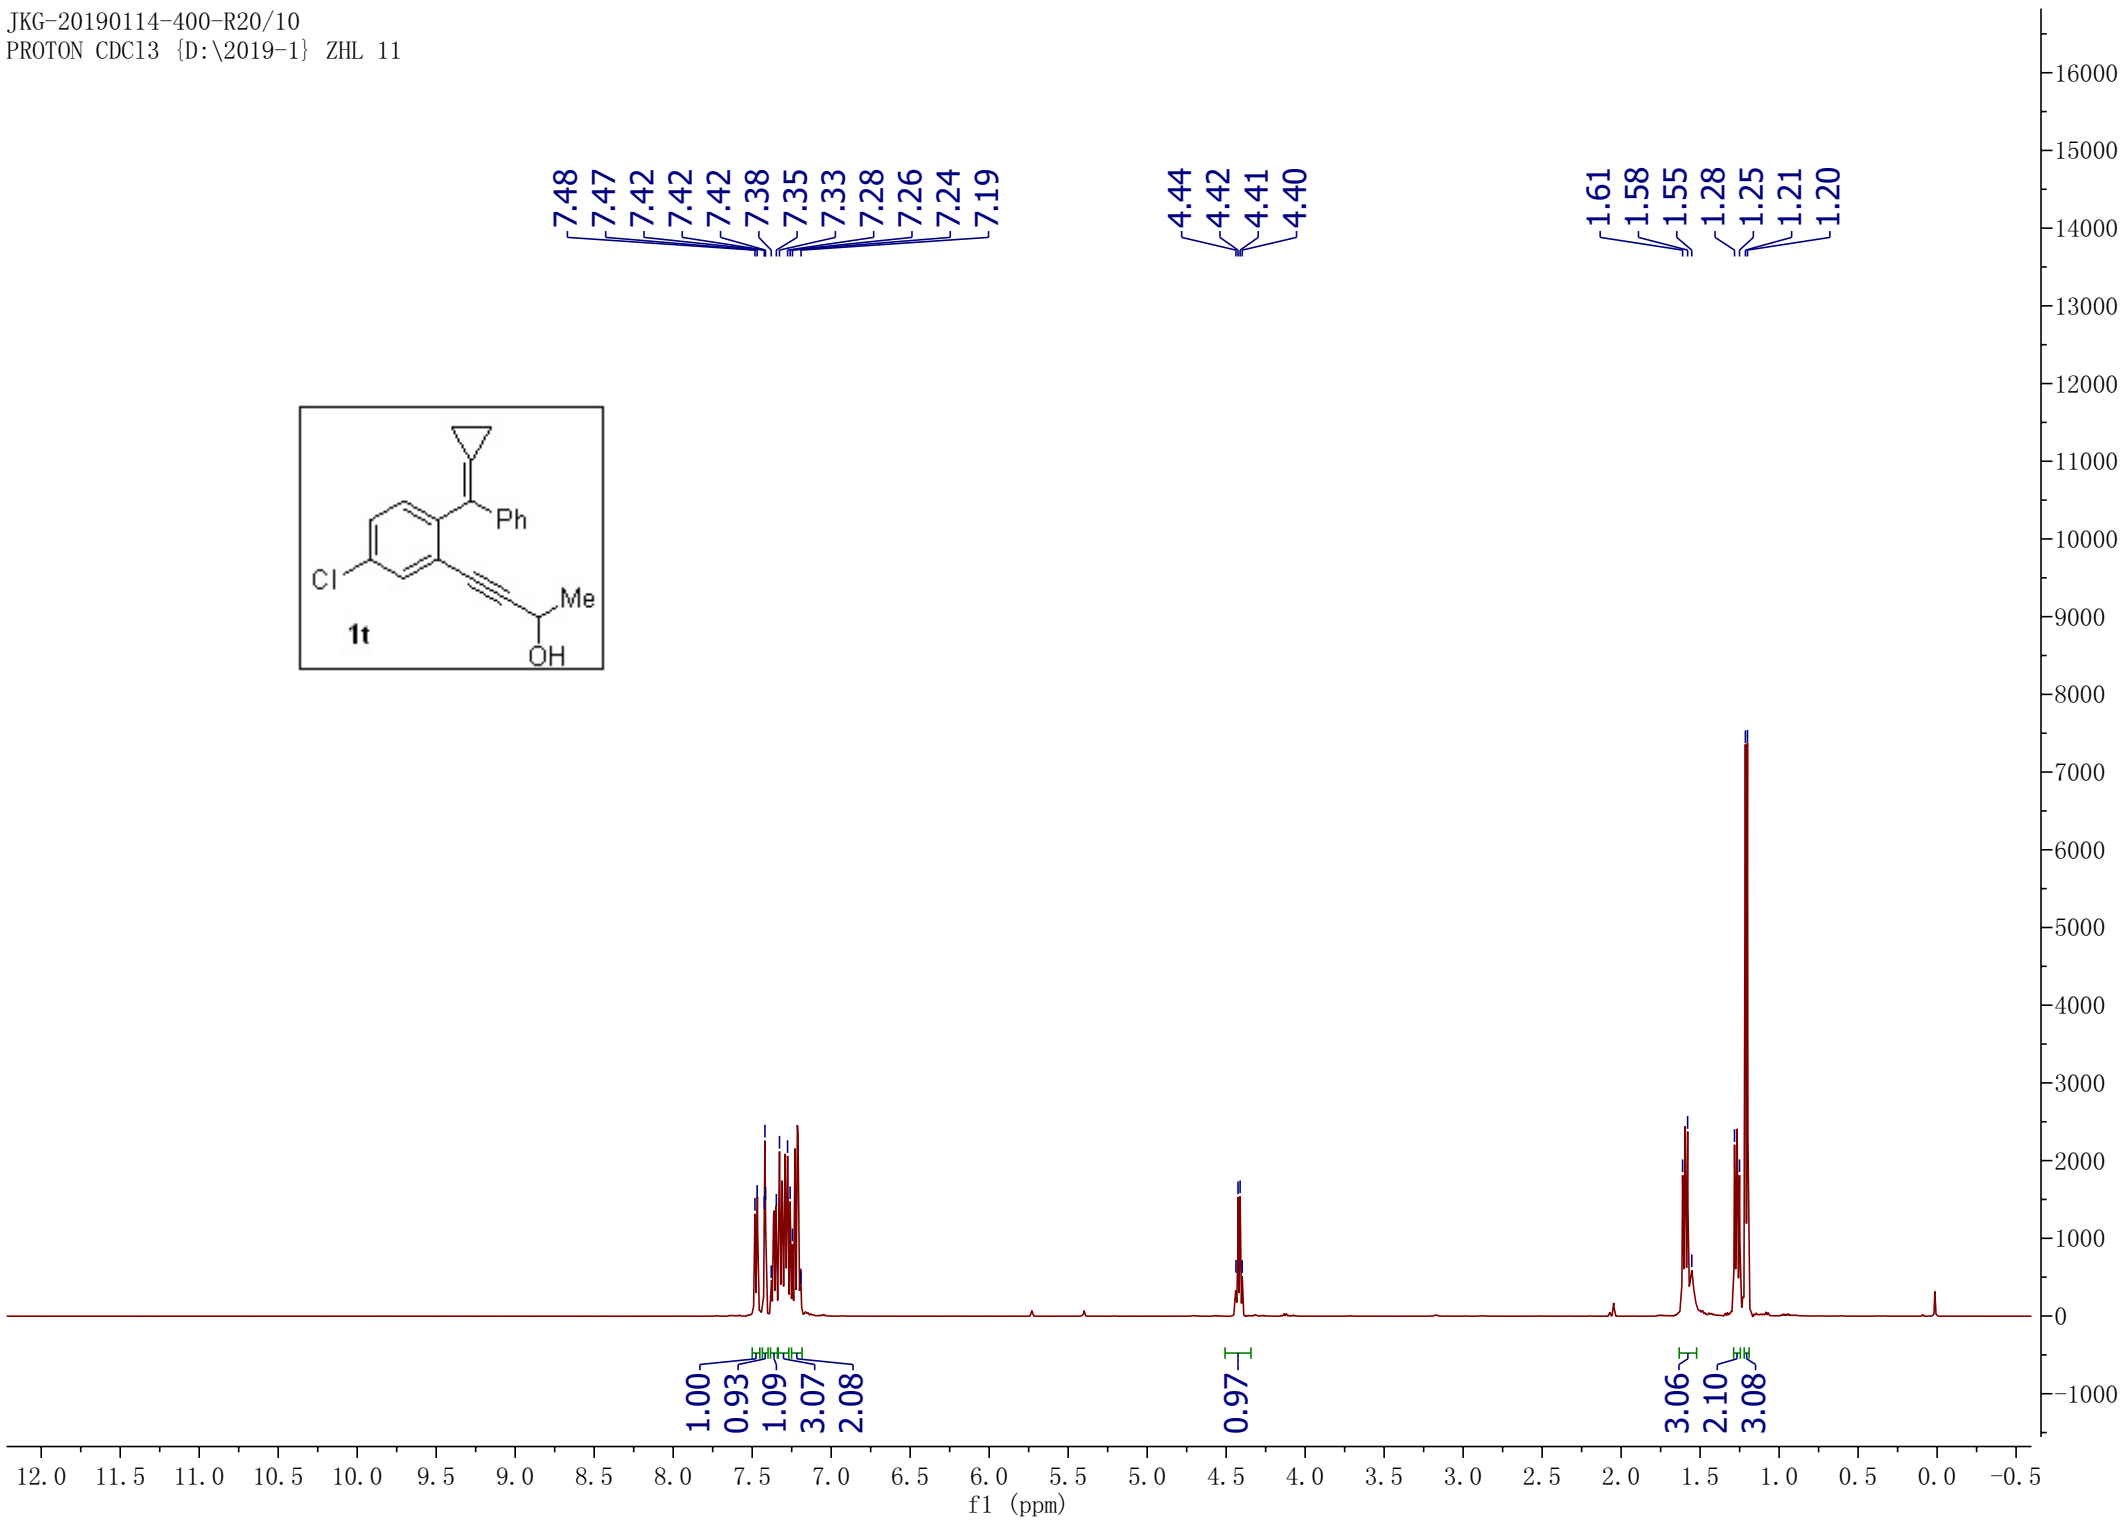



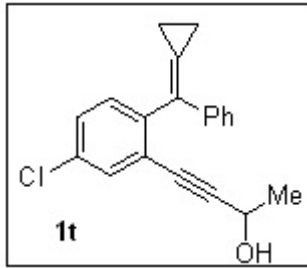

143.19  
142.70  
134.21  
132.72  
130.27  
129.37  
128.54  
128.34  
127.84  
127.32  
127.18  
126.63  
125.35  
122.36

—95.07

83.60

77.41 CDC13

77.16 CDC13

76.91 CDC13

—58.73

—24.06

~5.32

~2.52

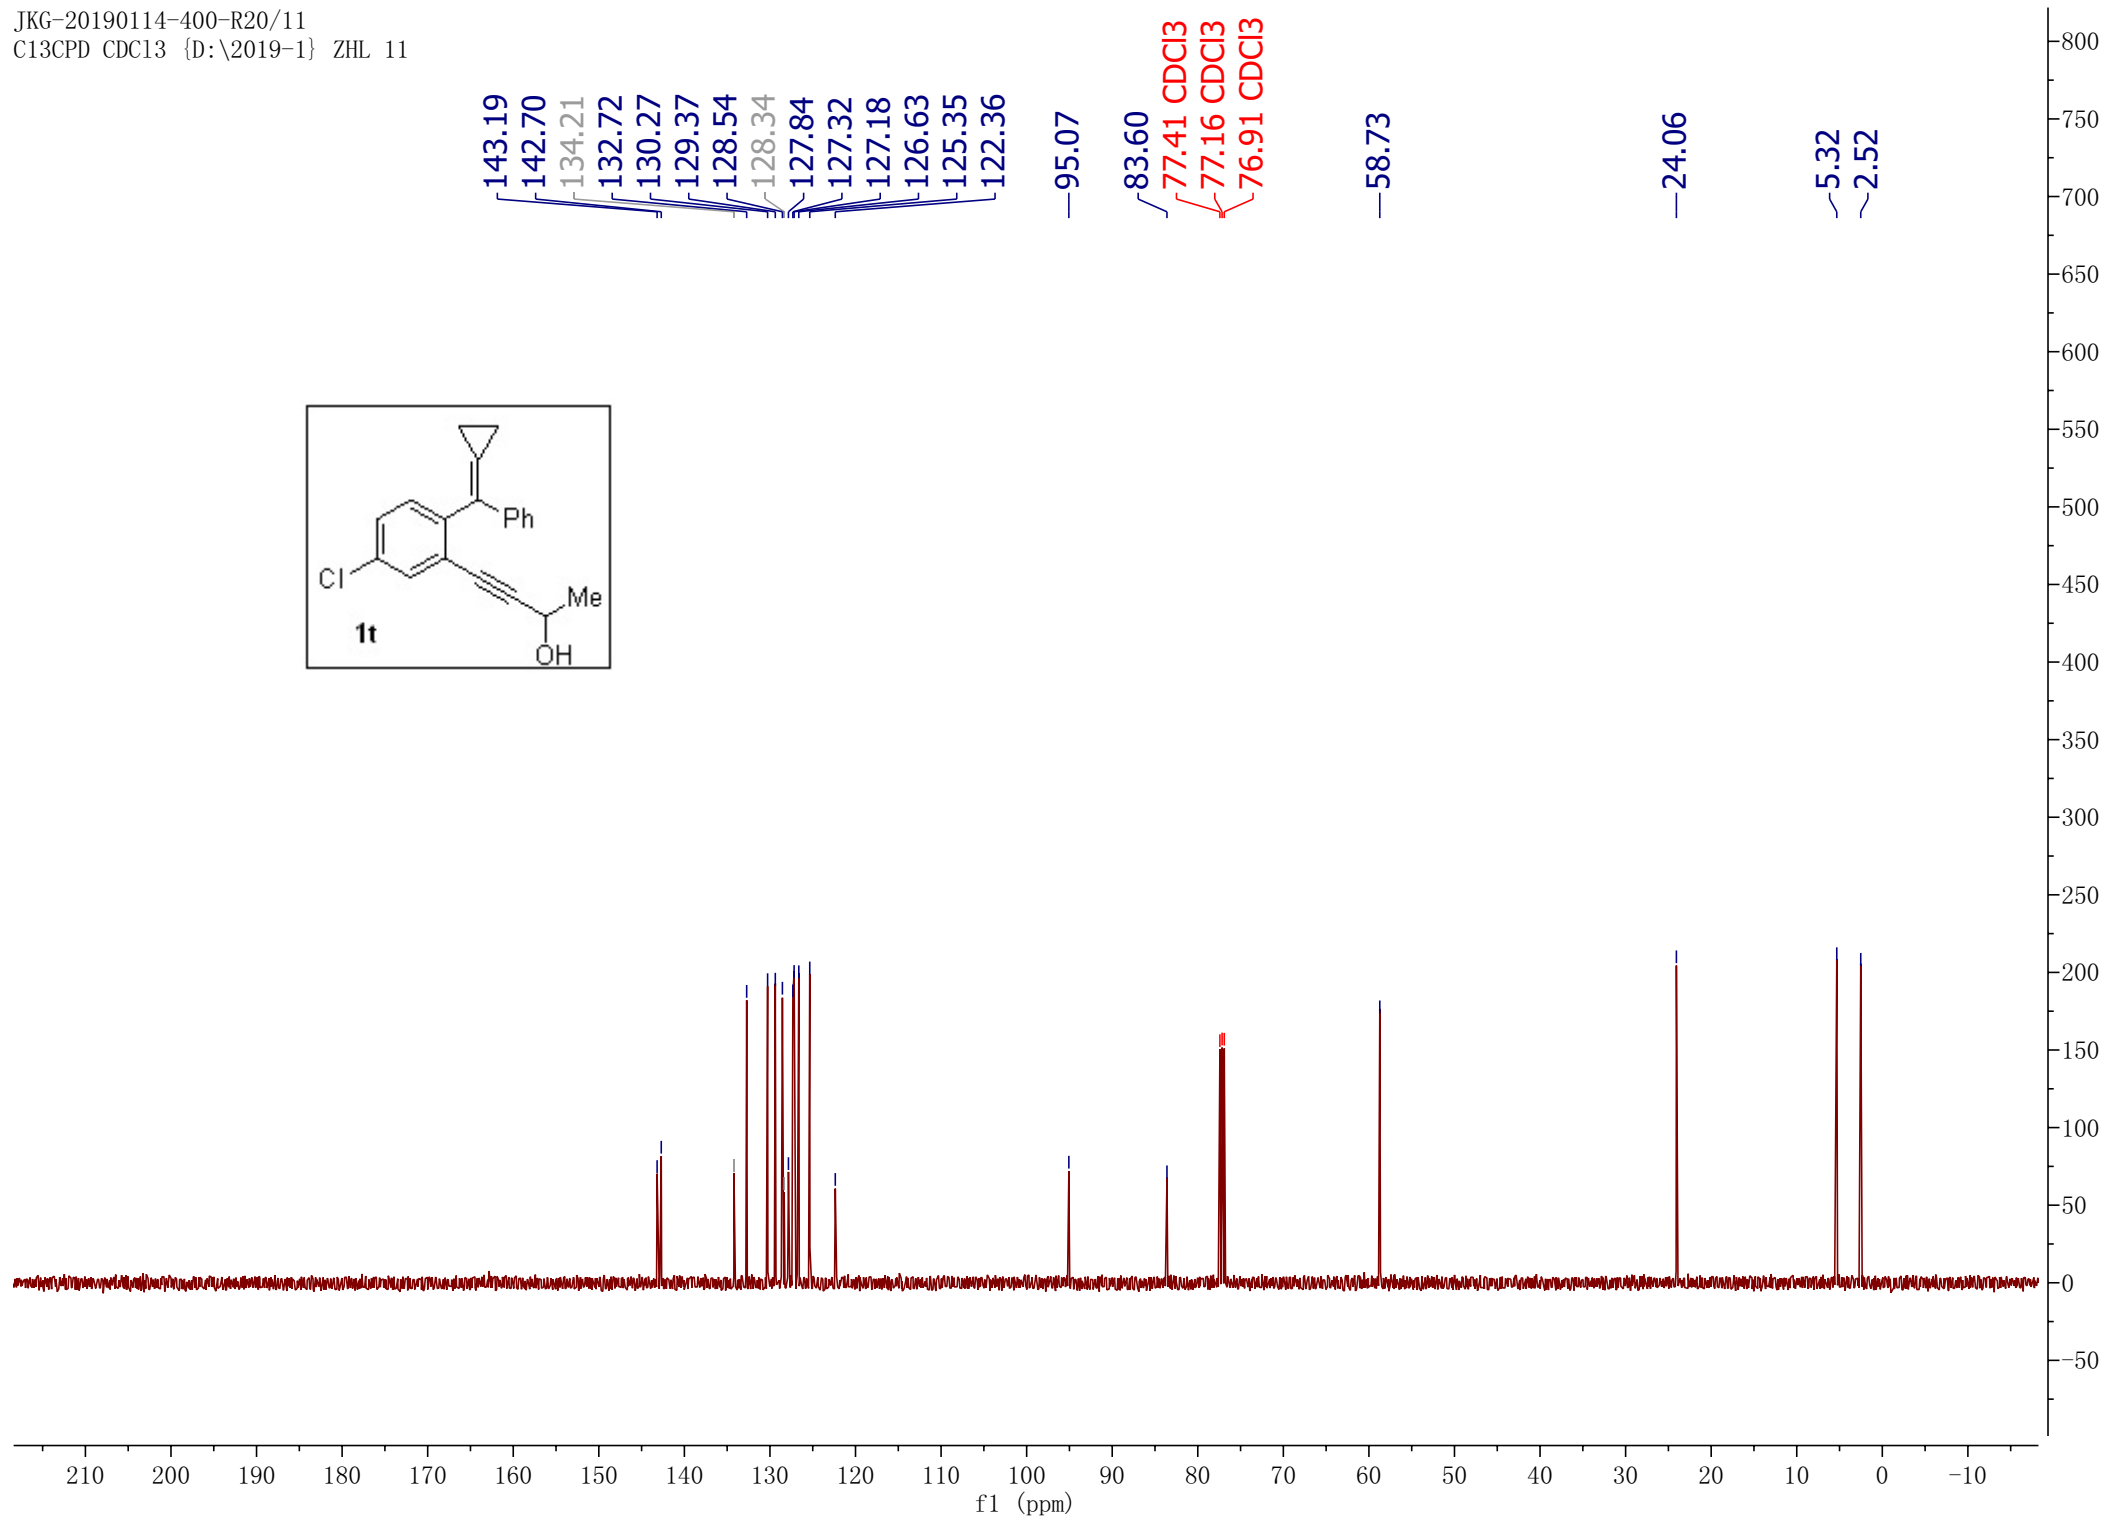

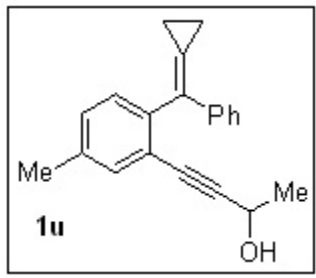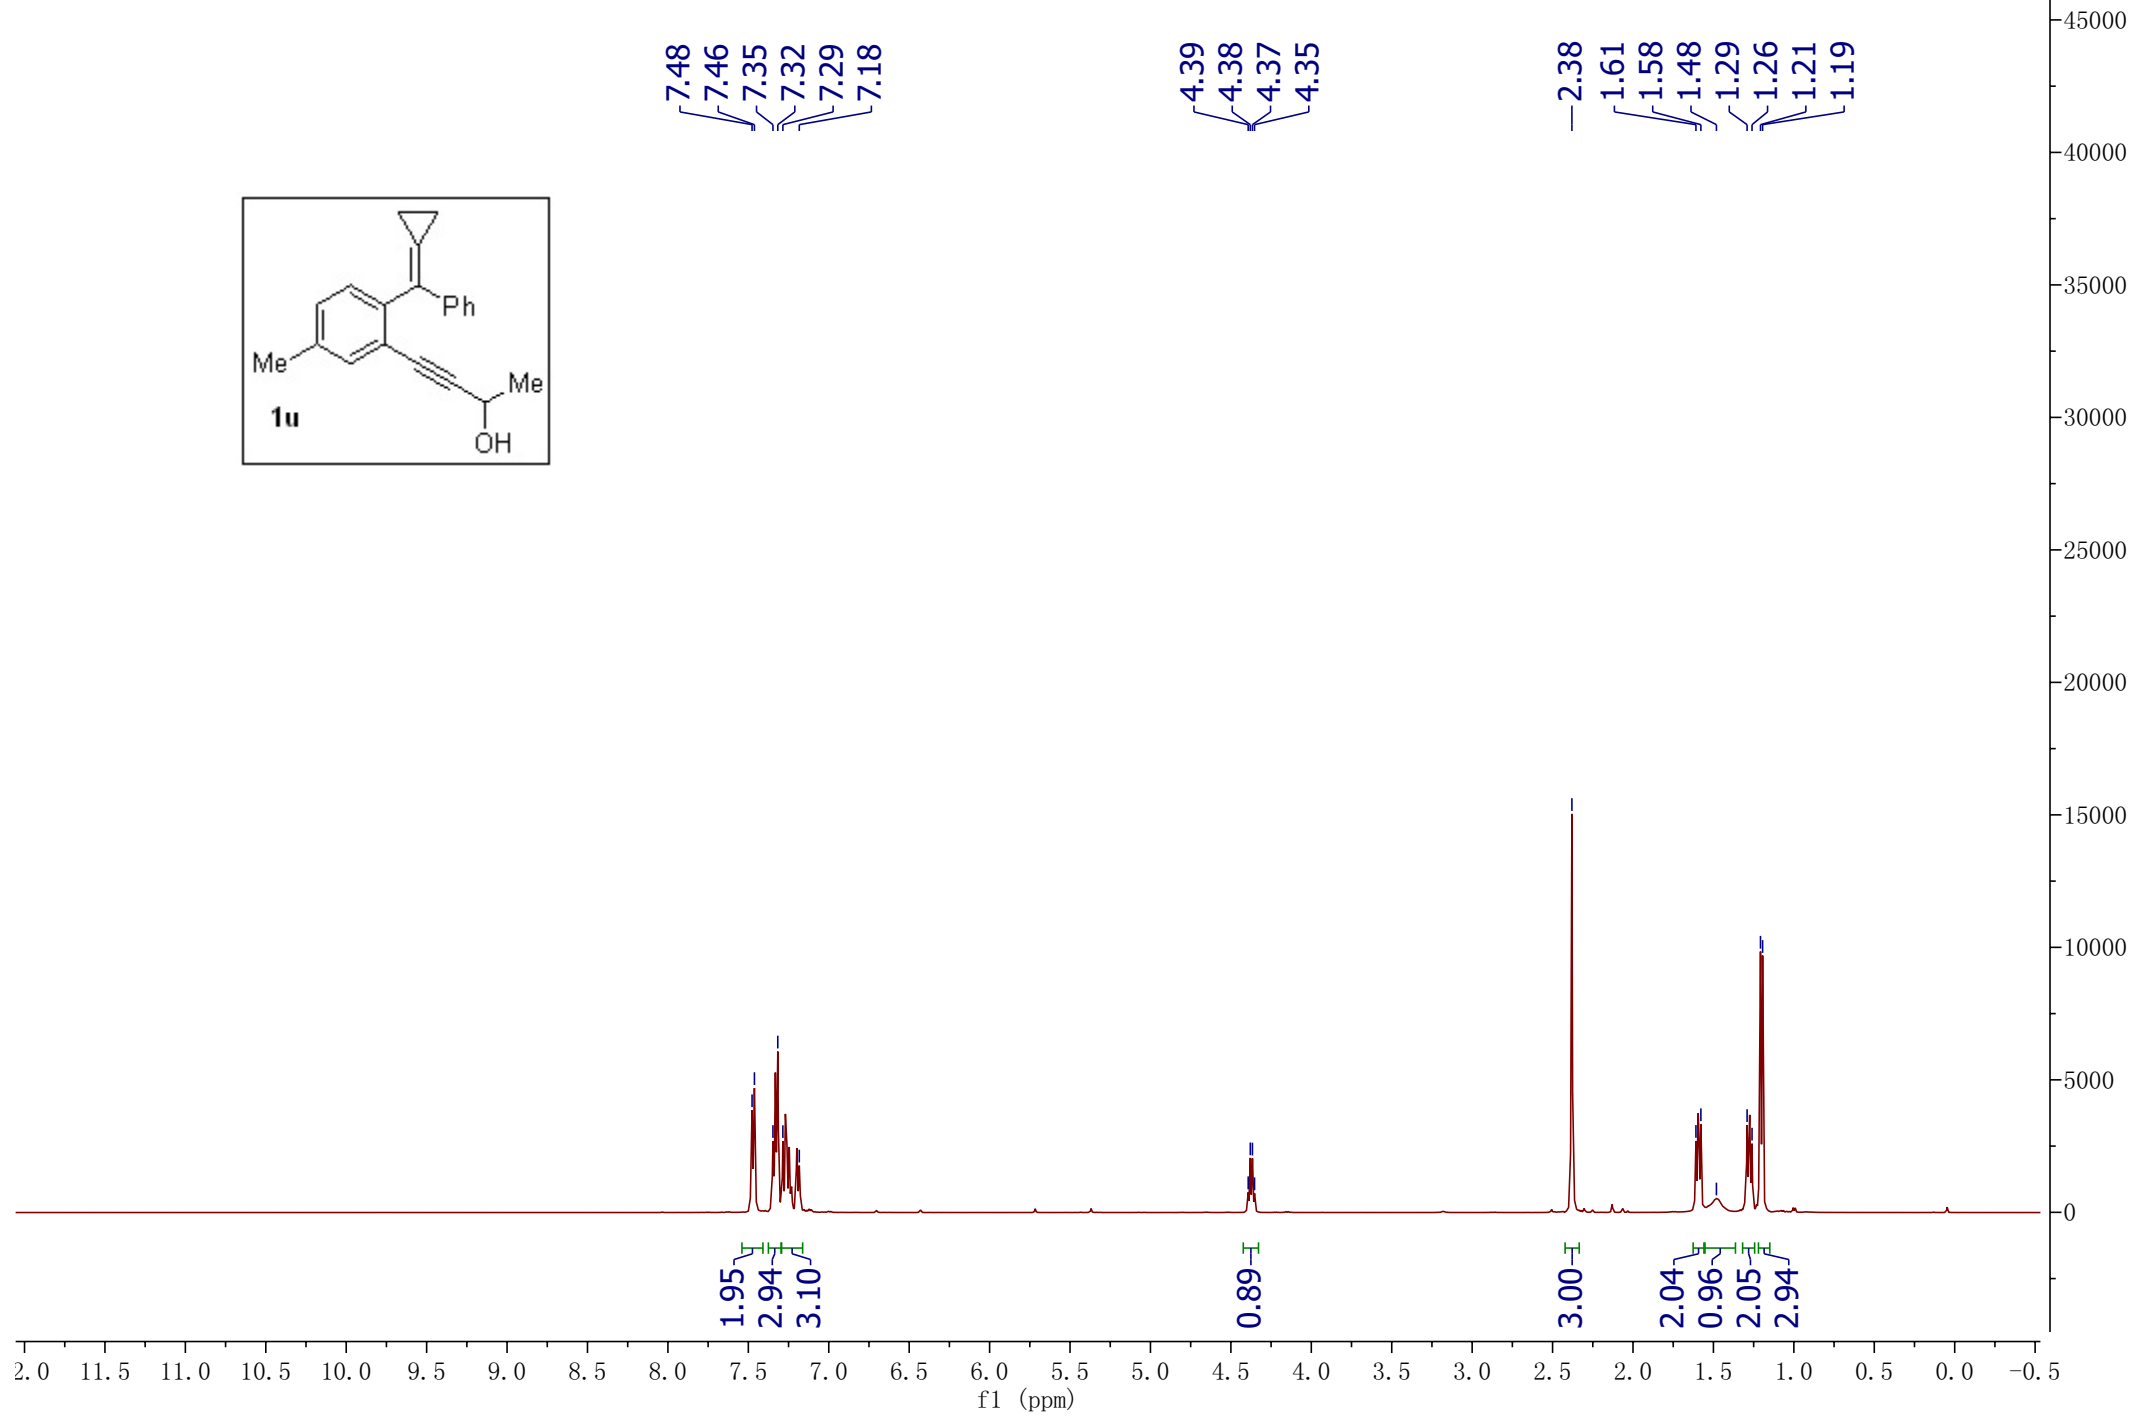

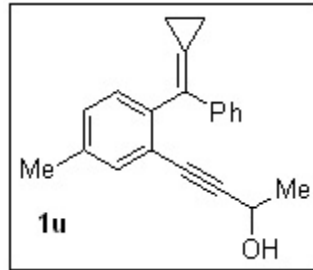

141.10  
141.04  
136.72  
132.99  
130.27  
129.32  
129.20  
128.10  
127.27  
126.57  
125.91  
122.11

—94.67

83.98

77.42 CDC13

77.16 CDC13

76.91 CDC13

—58.60

~23.95

~21.00

~5.20

~2.37

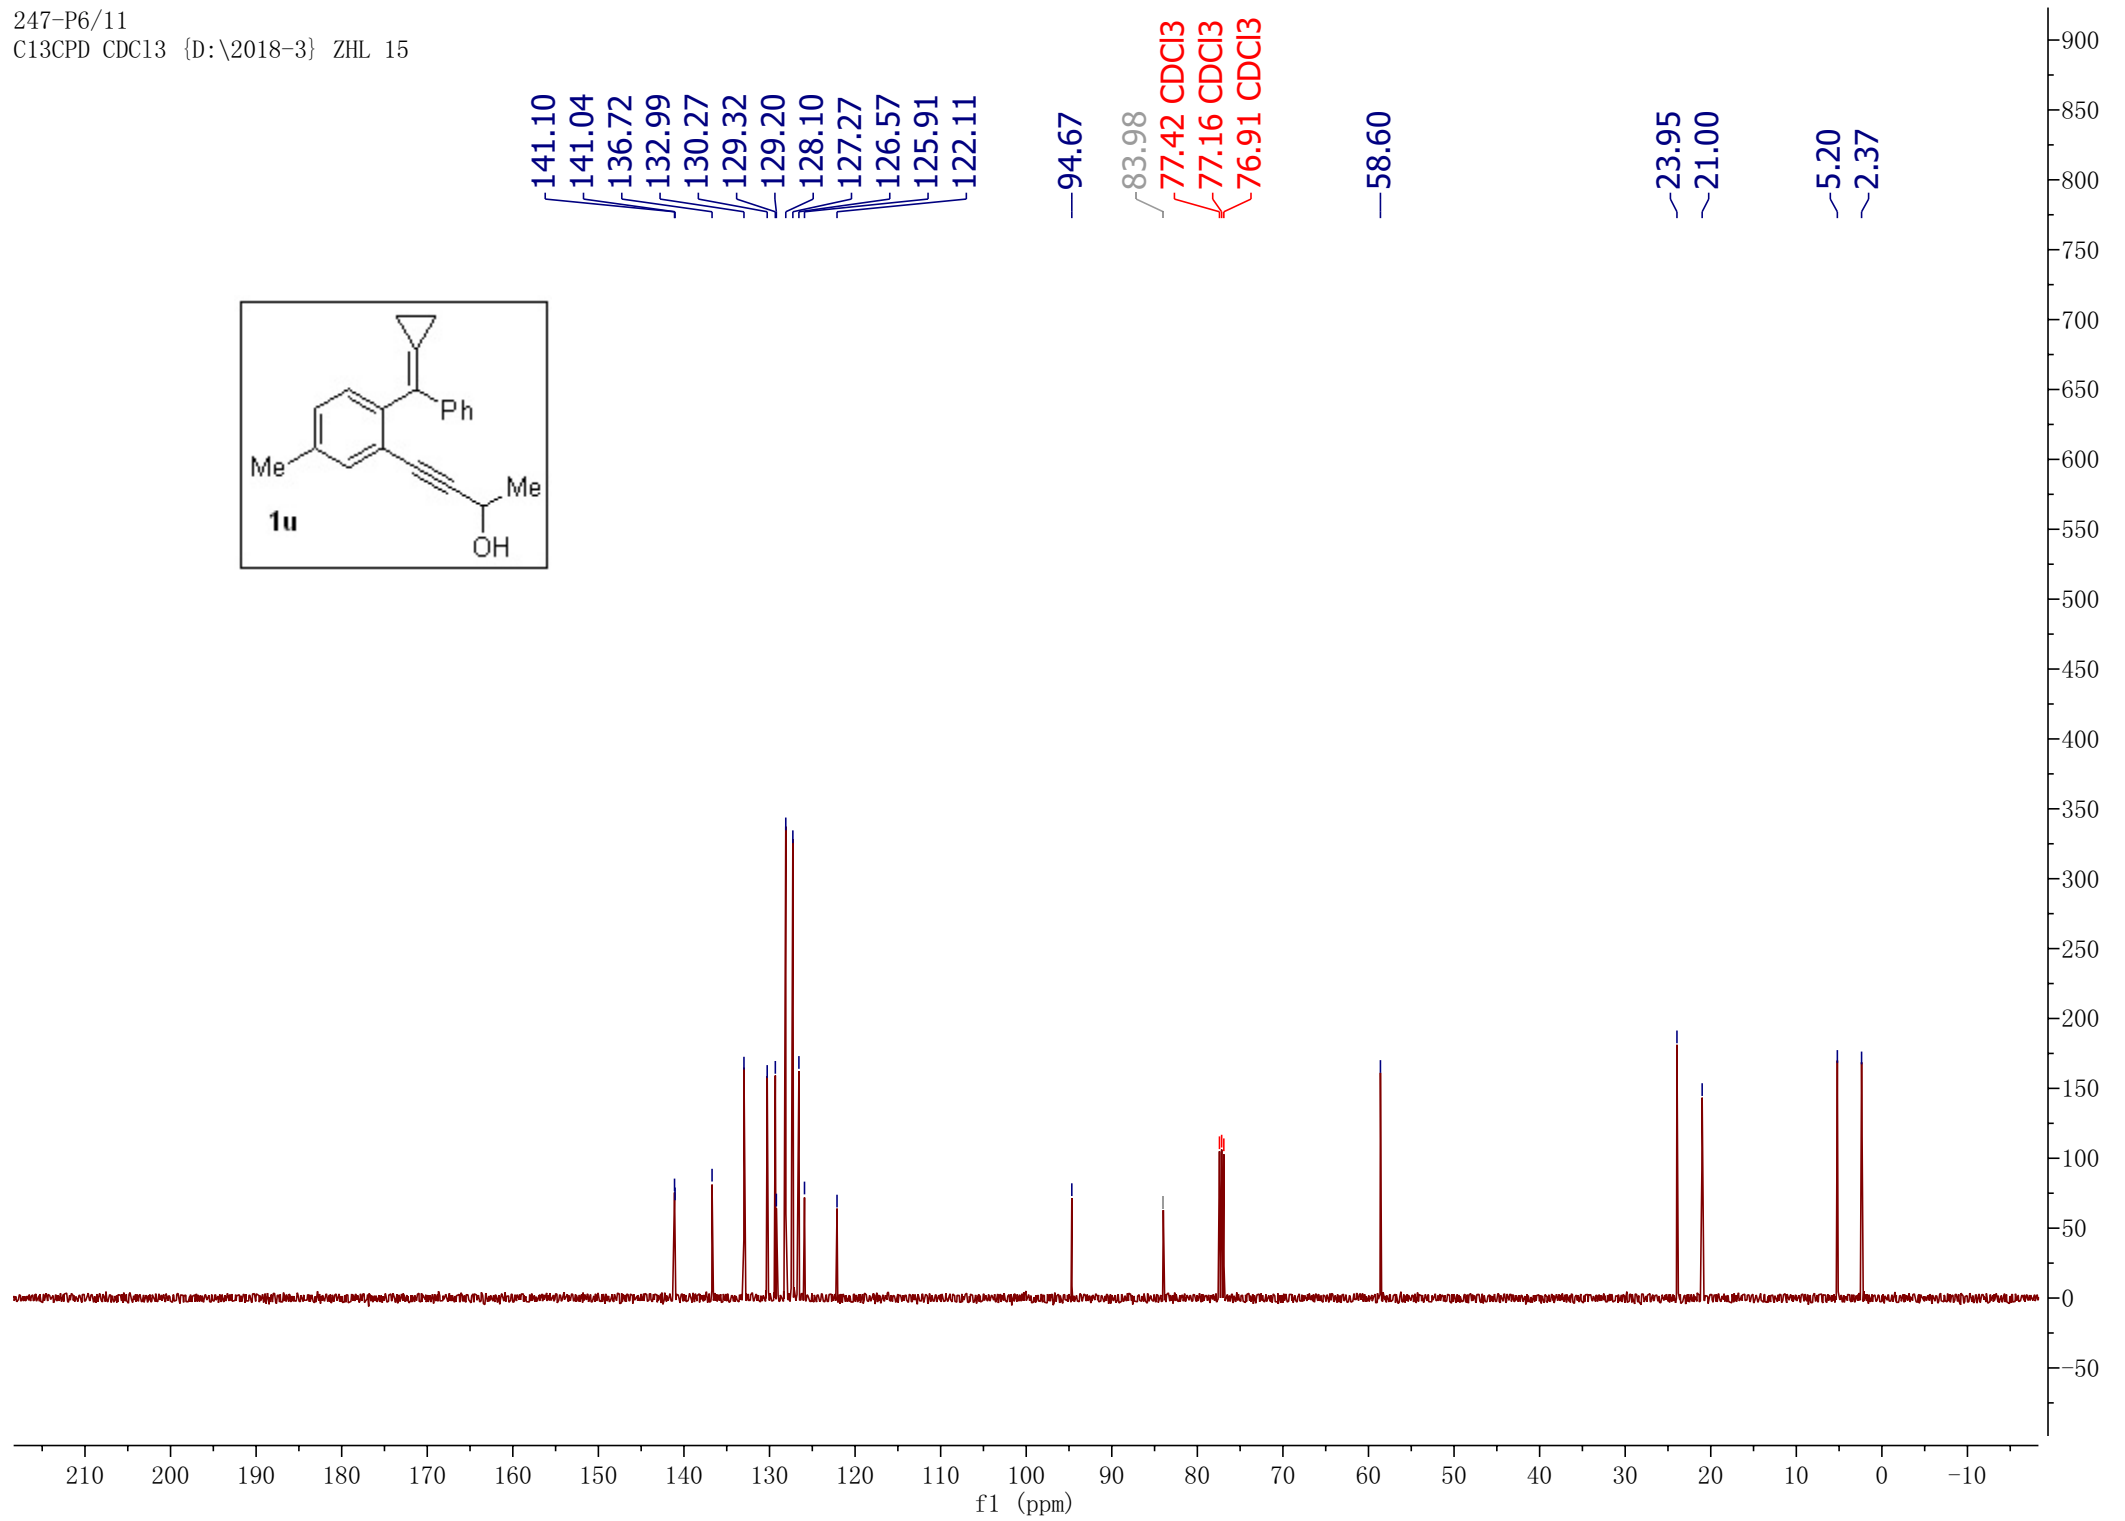

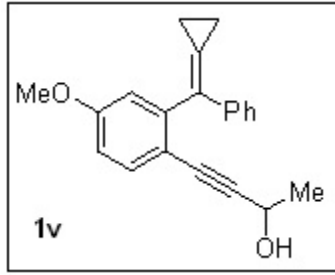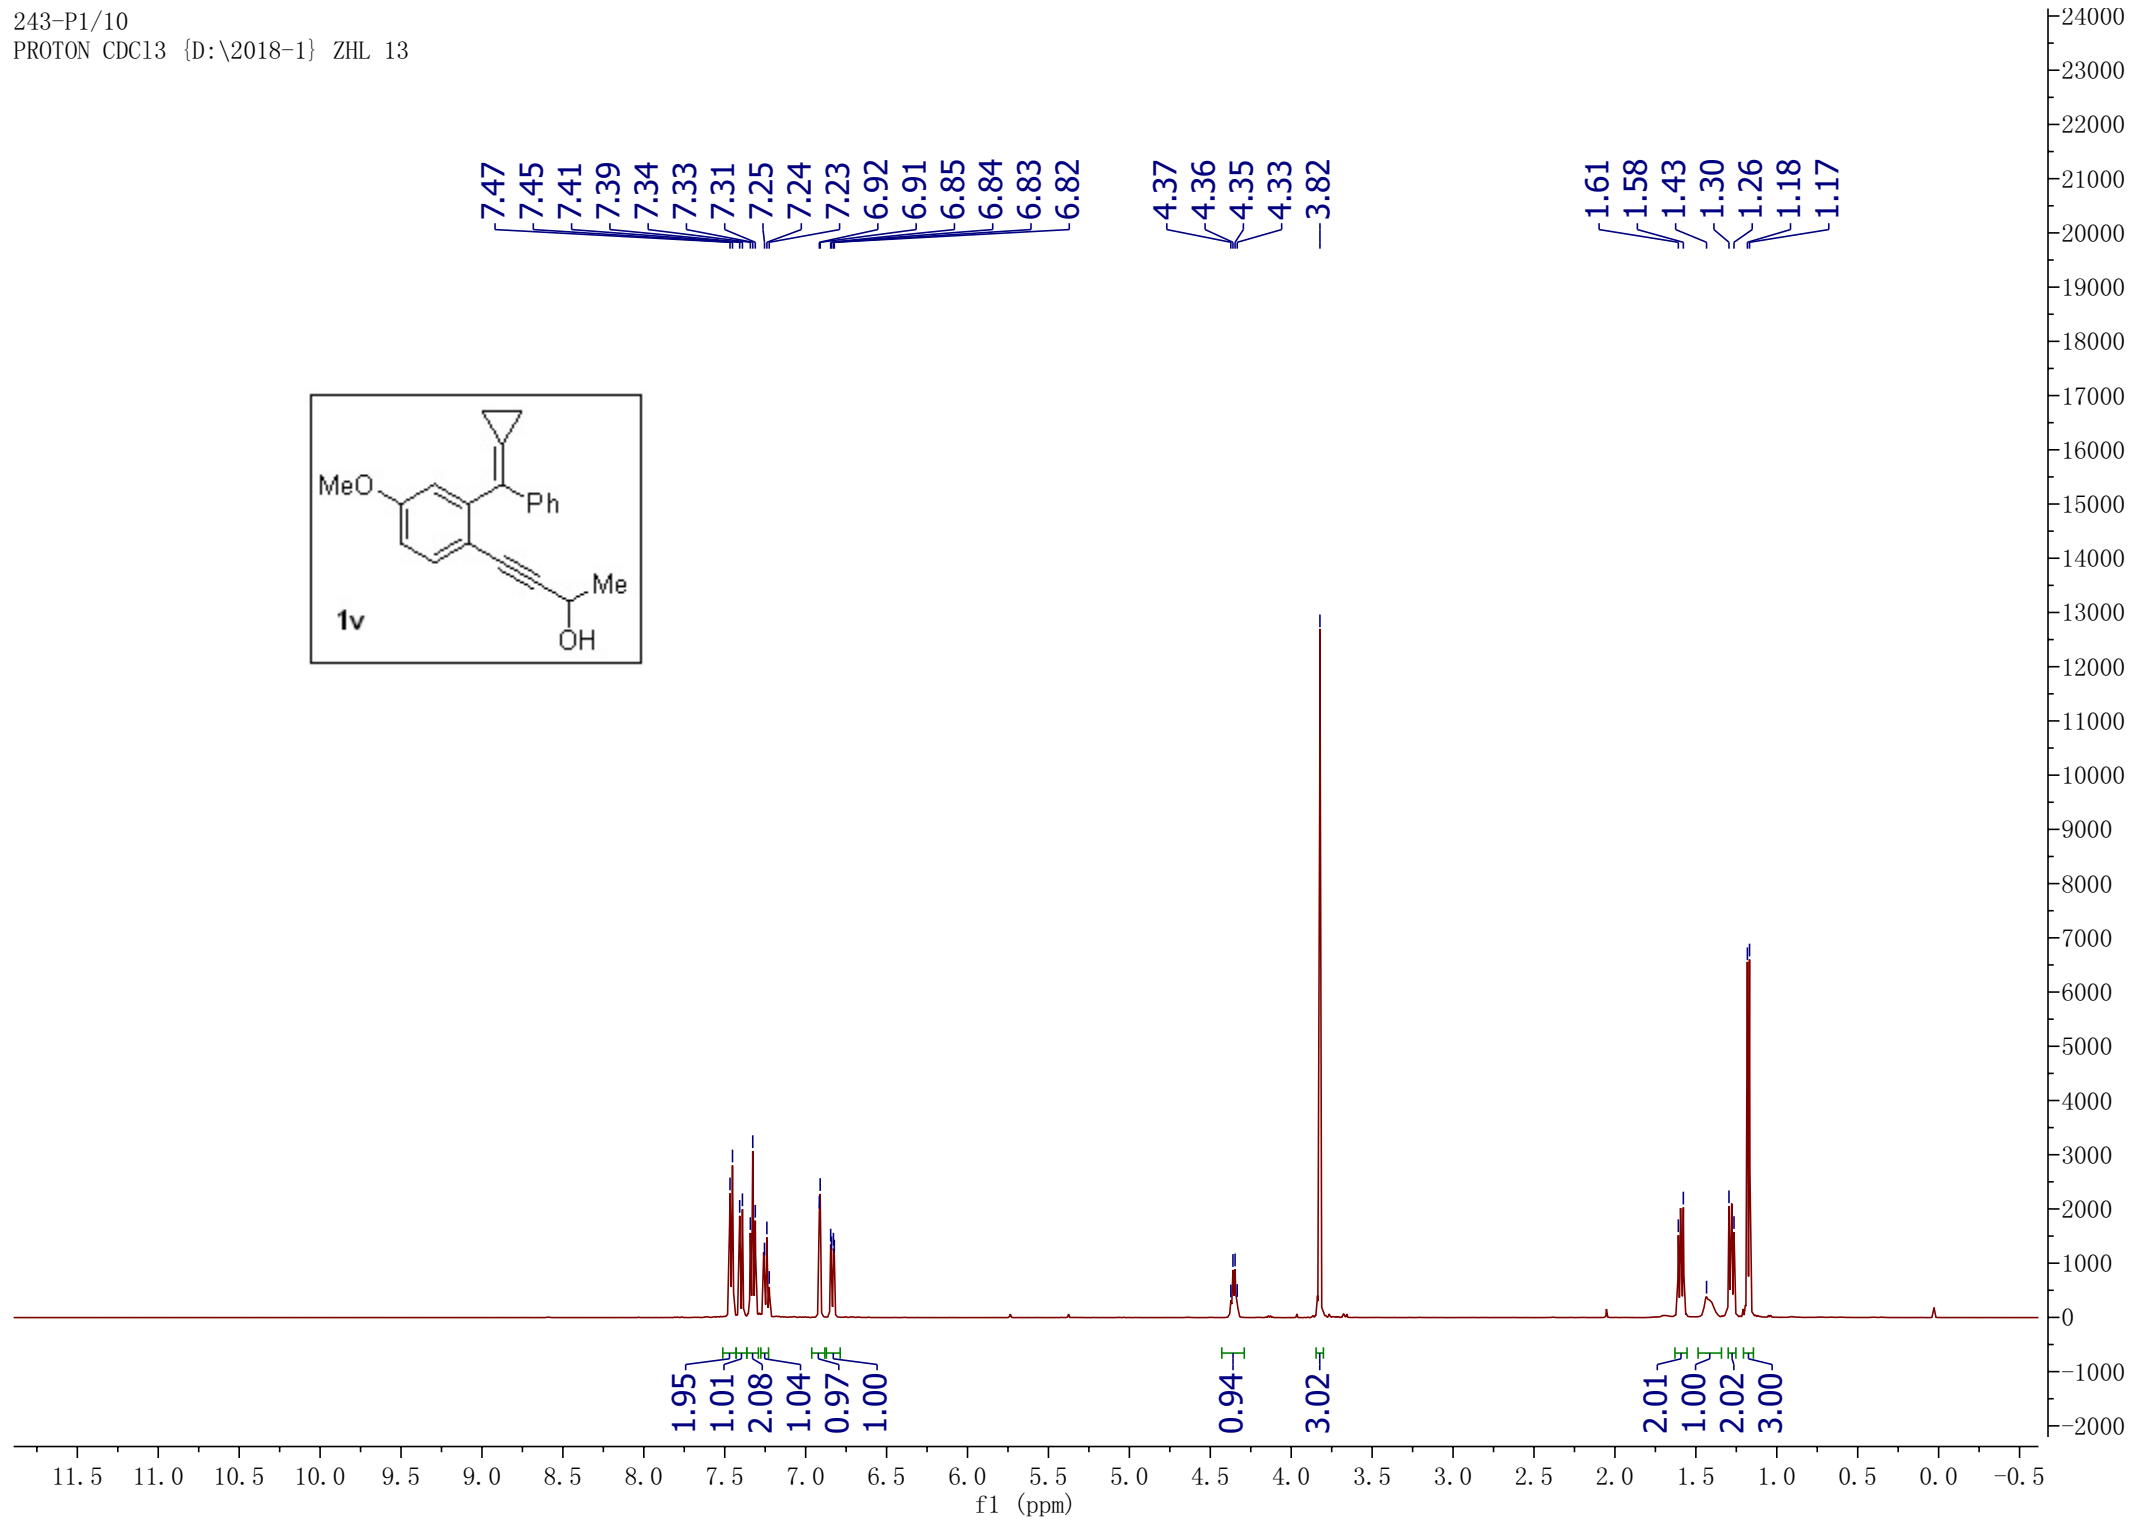

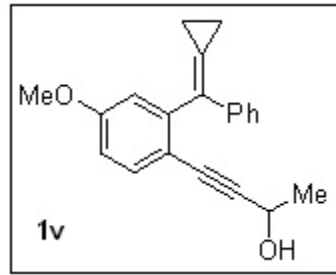

159.56  
145.59  
140.69  
133.84  
129.35  
128.15  
127.22  
126.65  
126.20  
115.87  
114.72  
112.80

93.51

83.69

77.41 CDC13

77.16 CDC13

76.91 CDC13

58.66

55.40

24.02

5.25

2.40

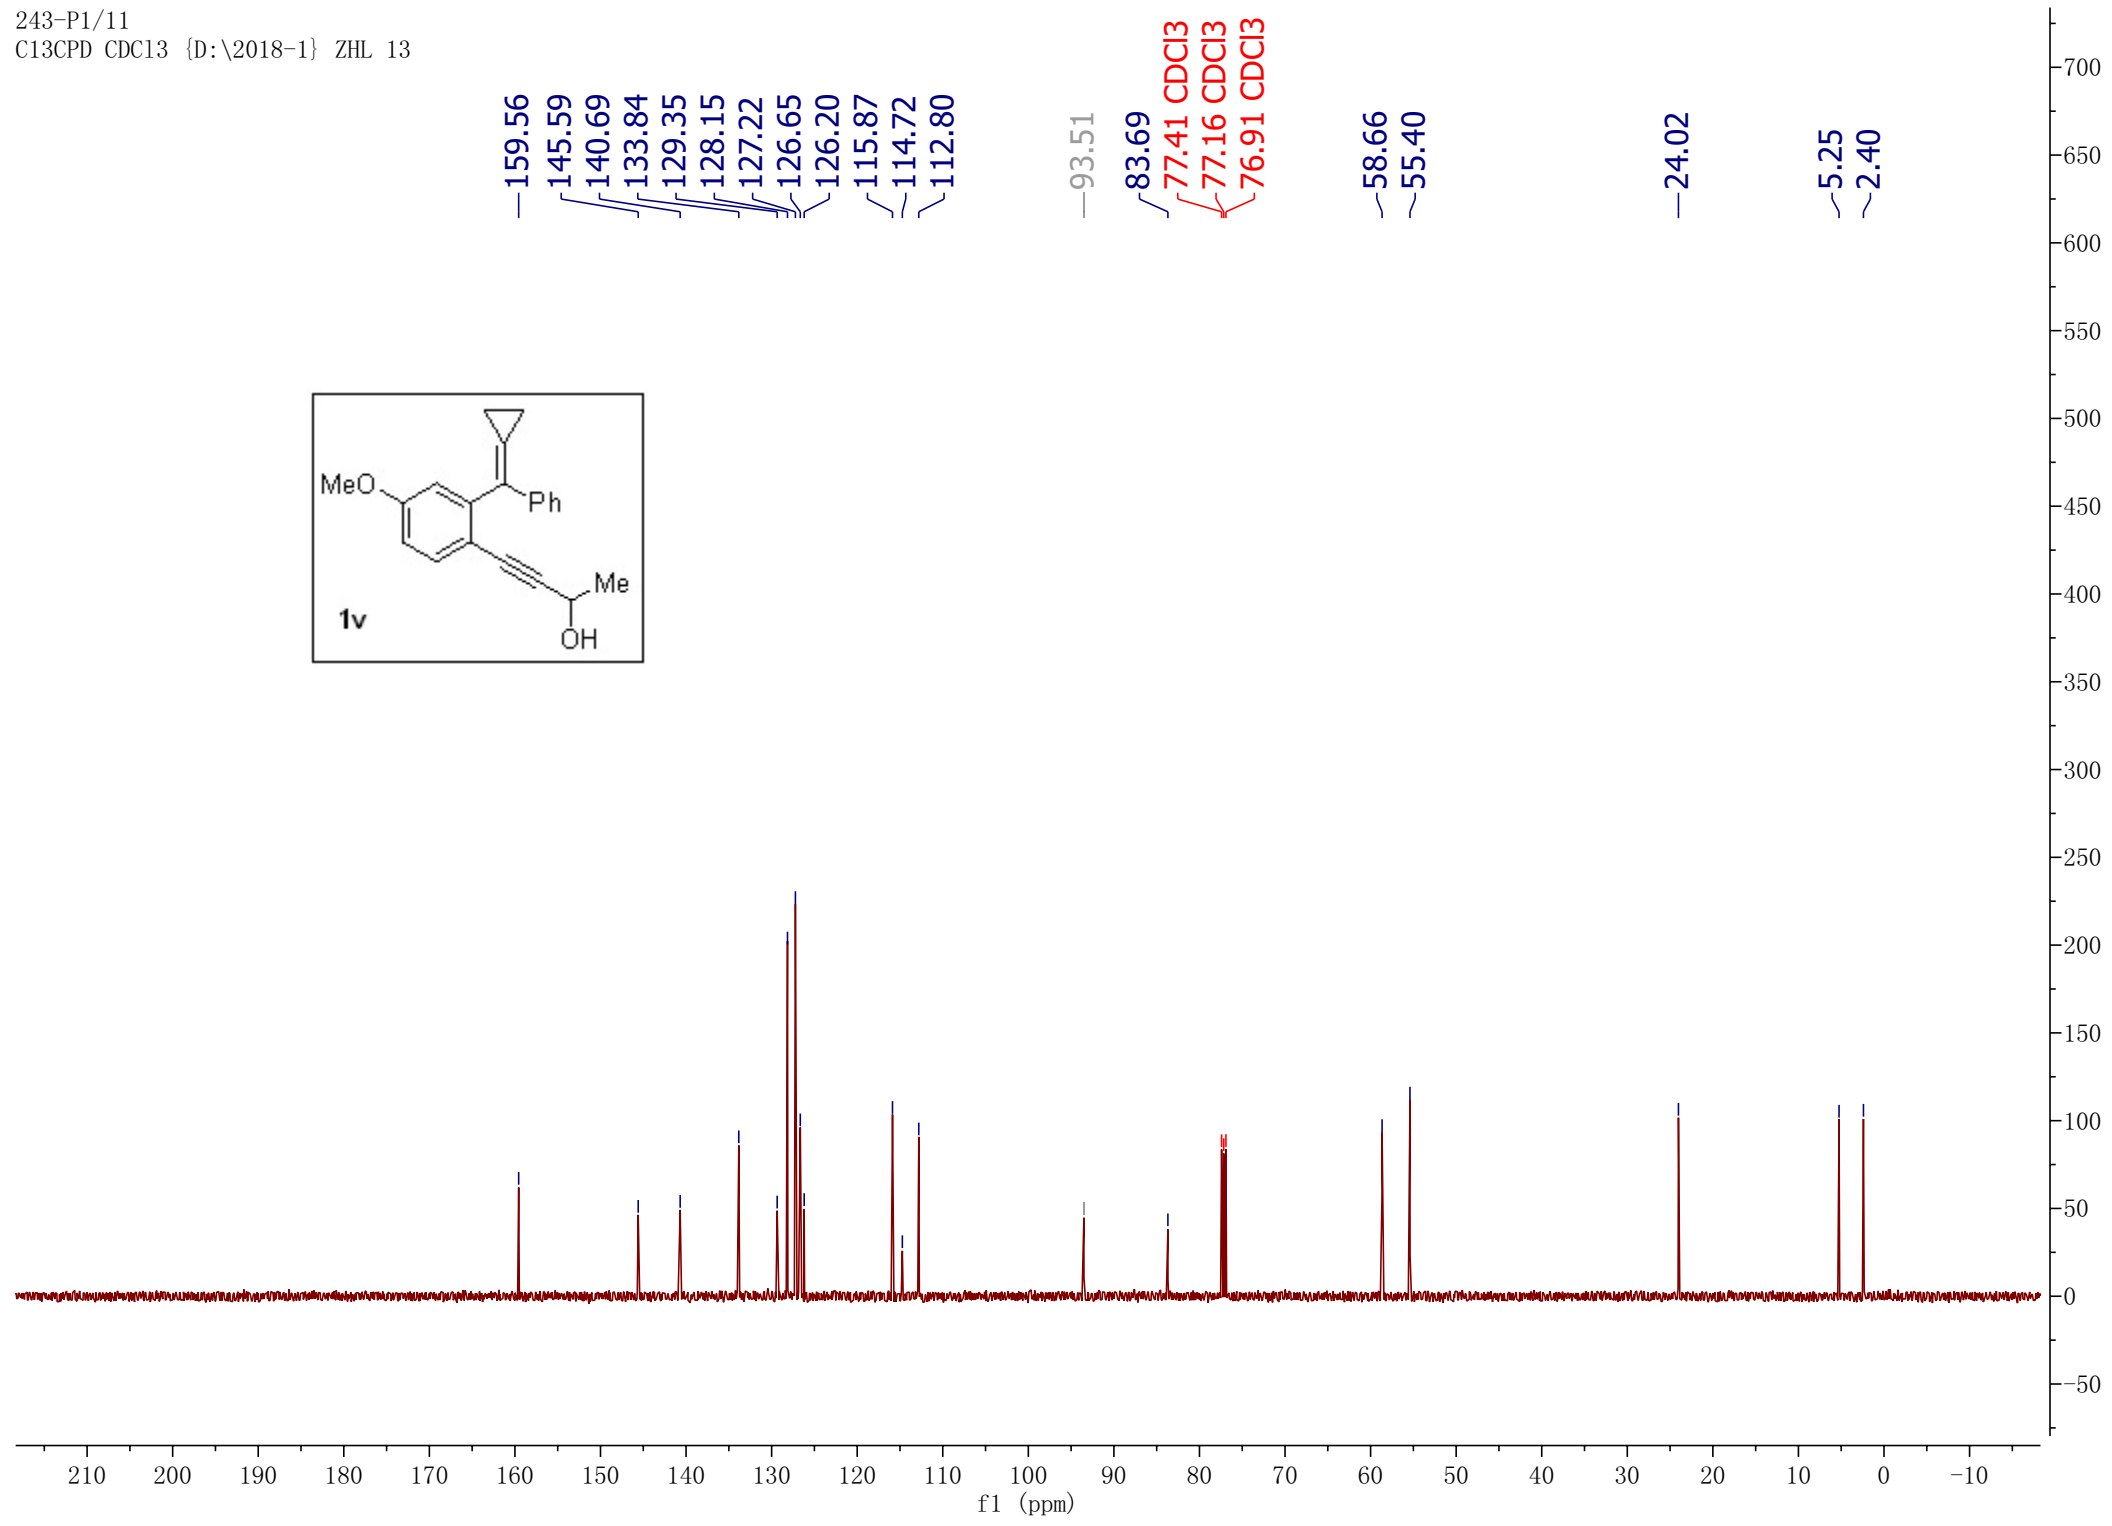

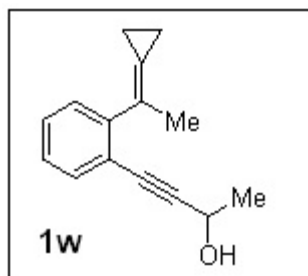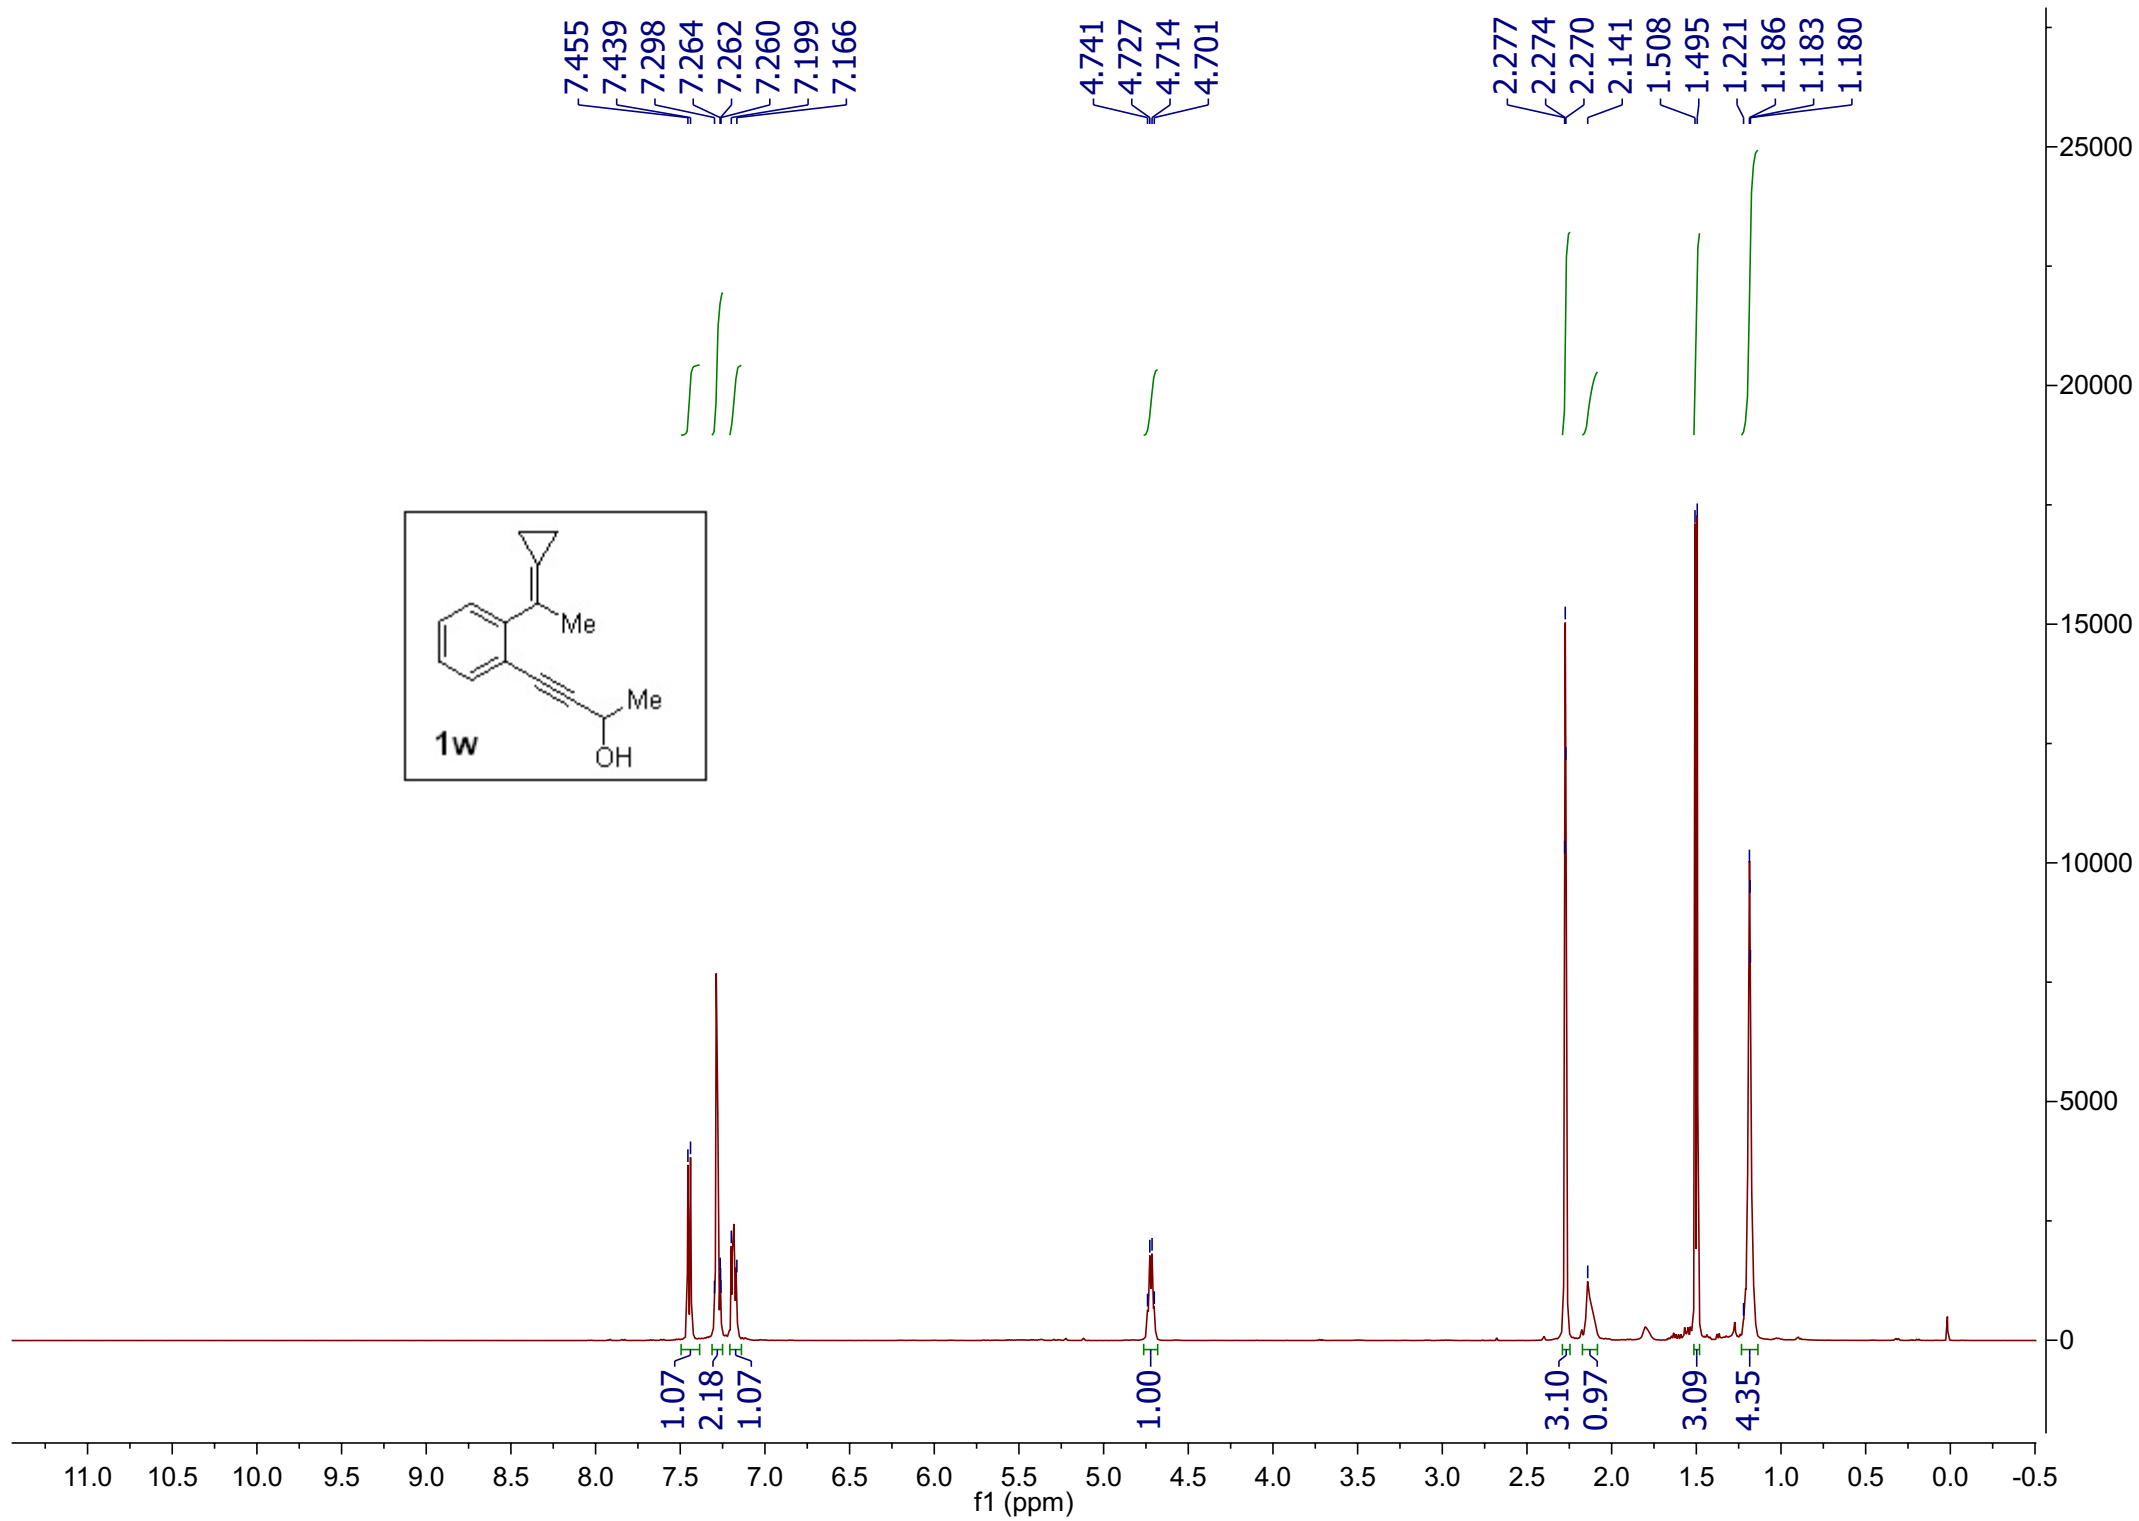

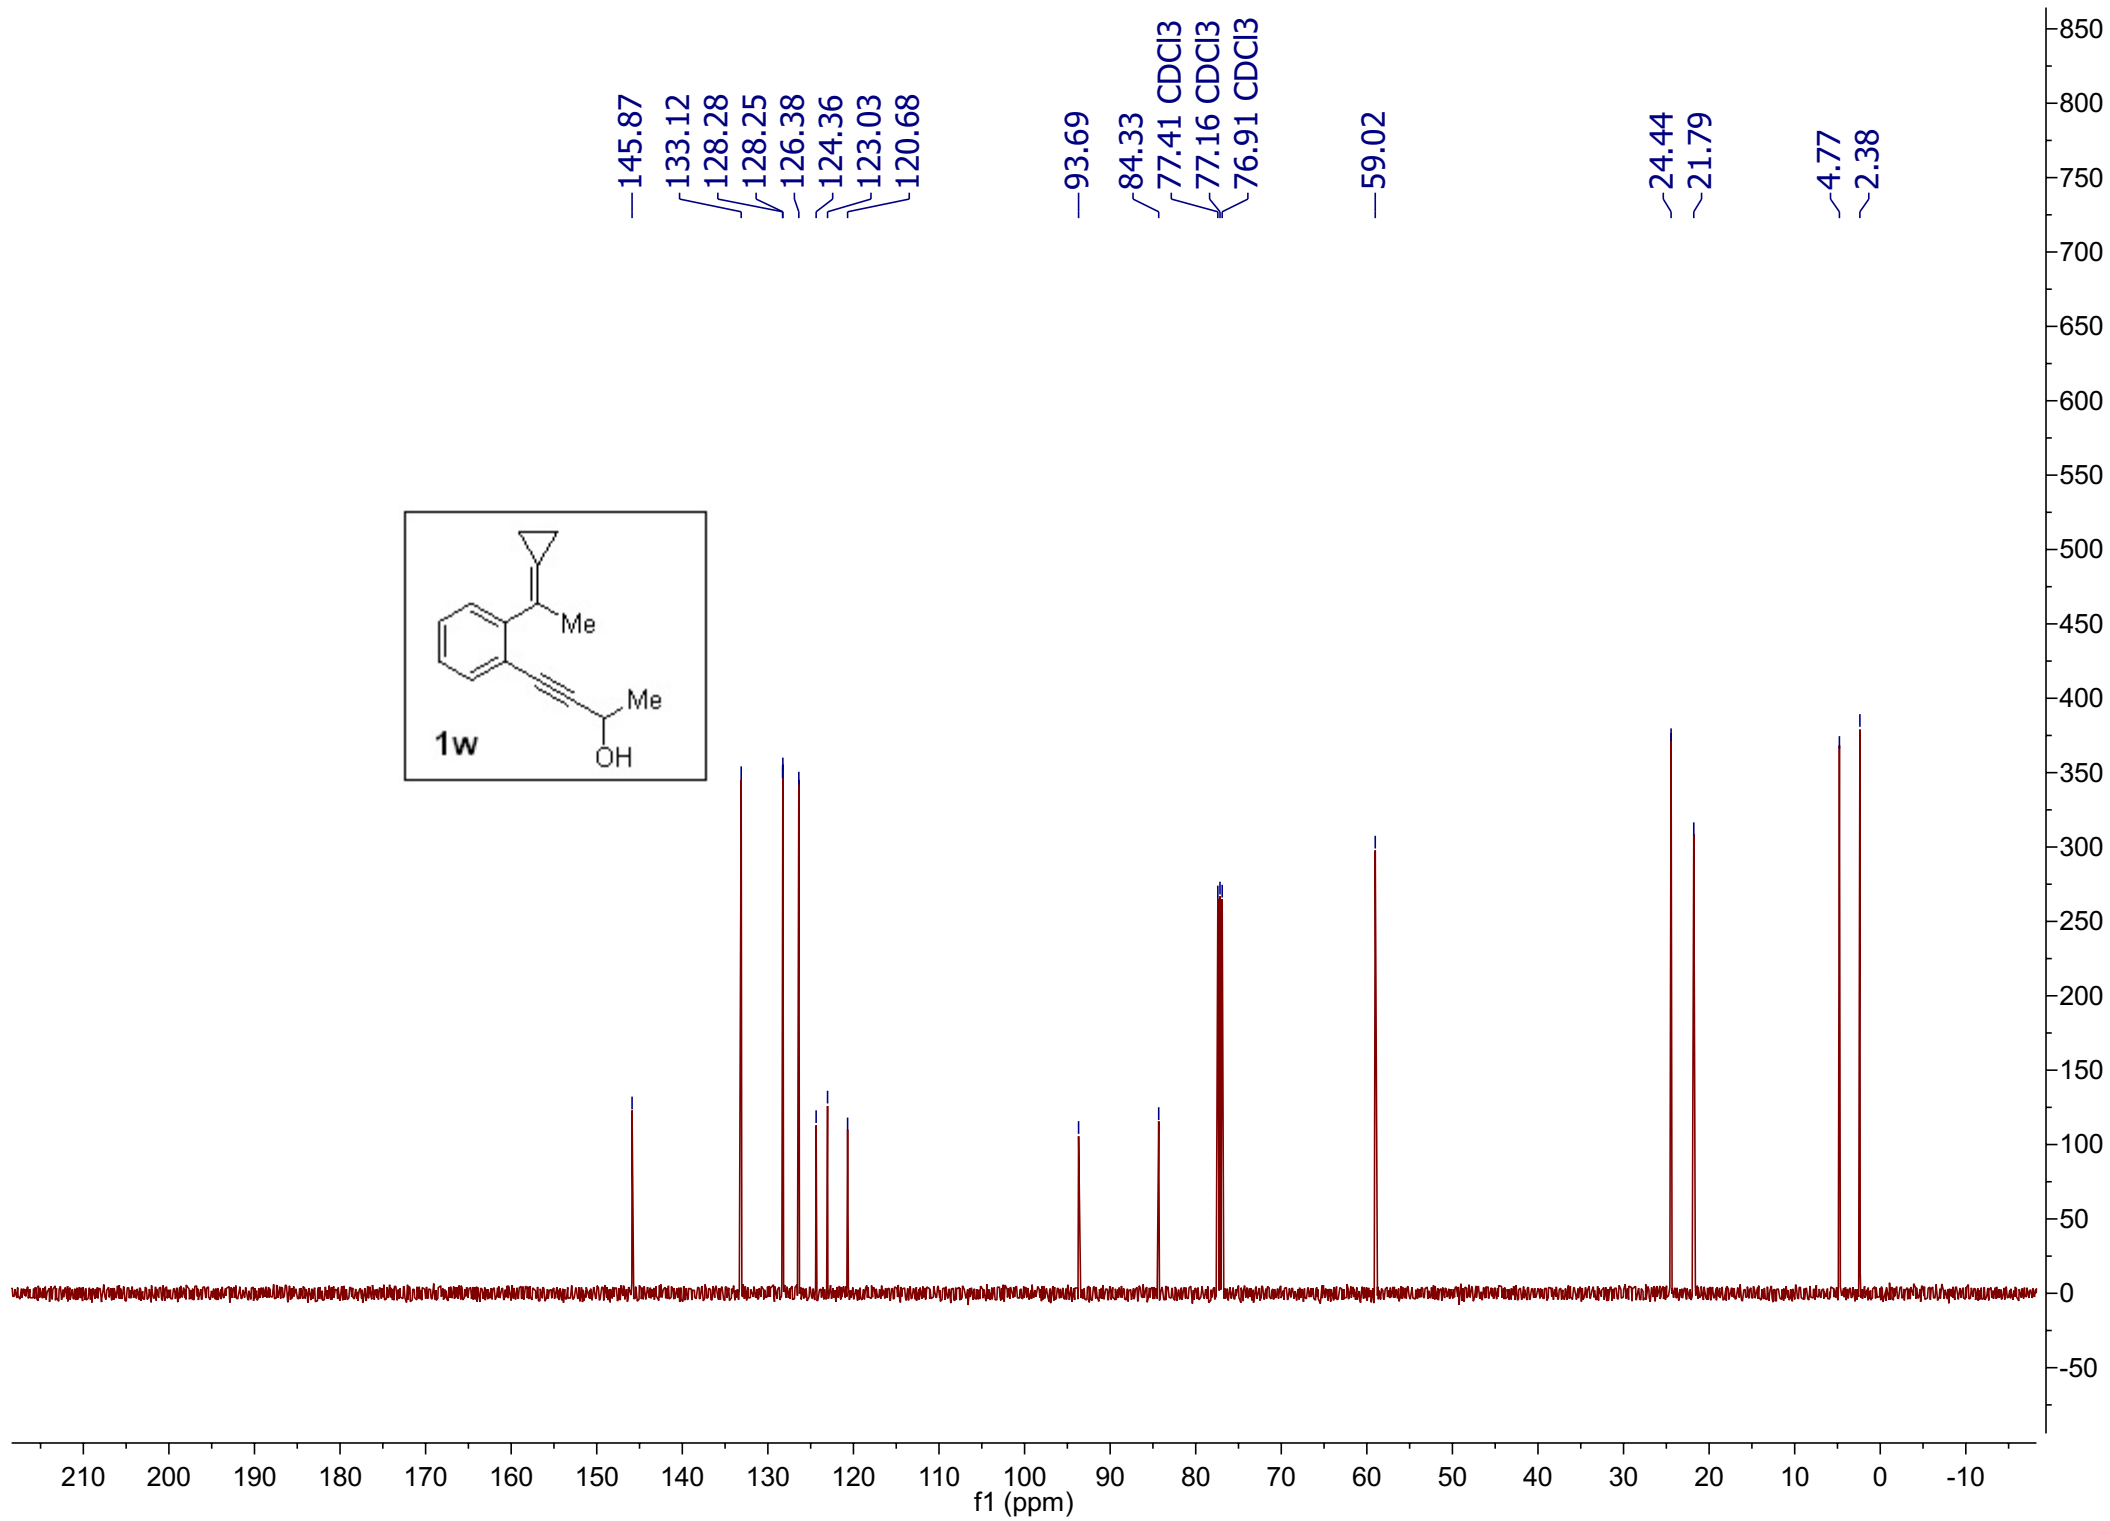

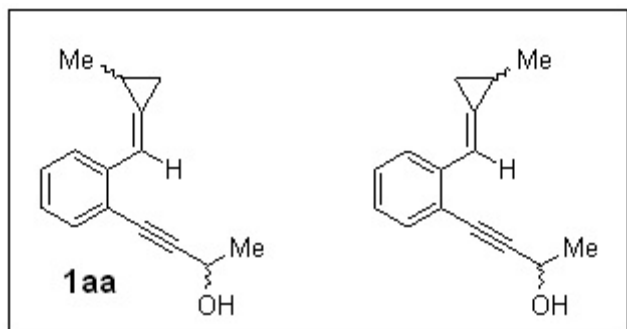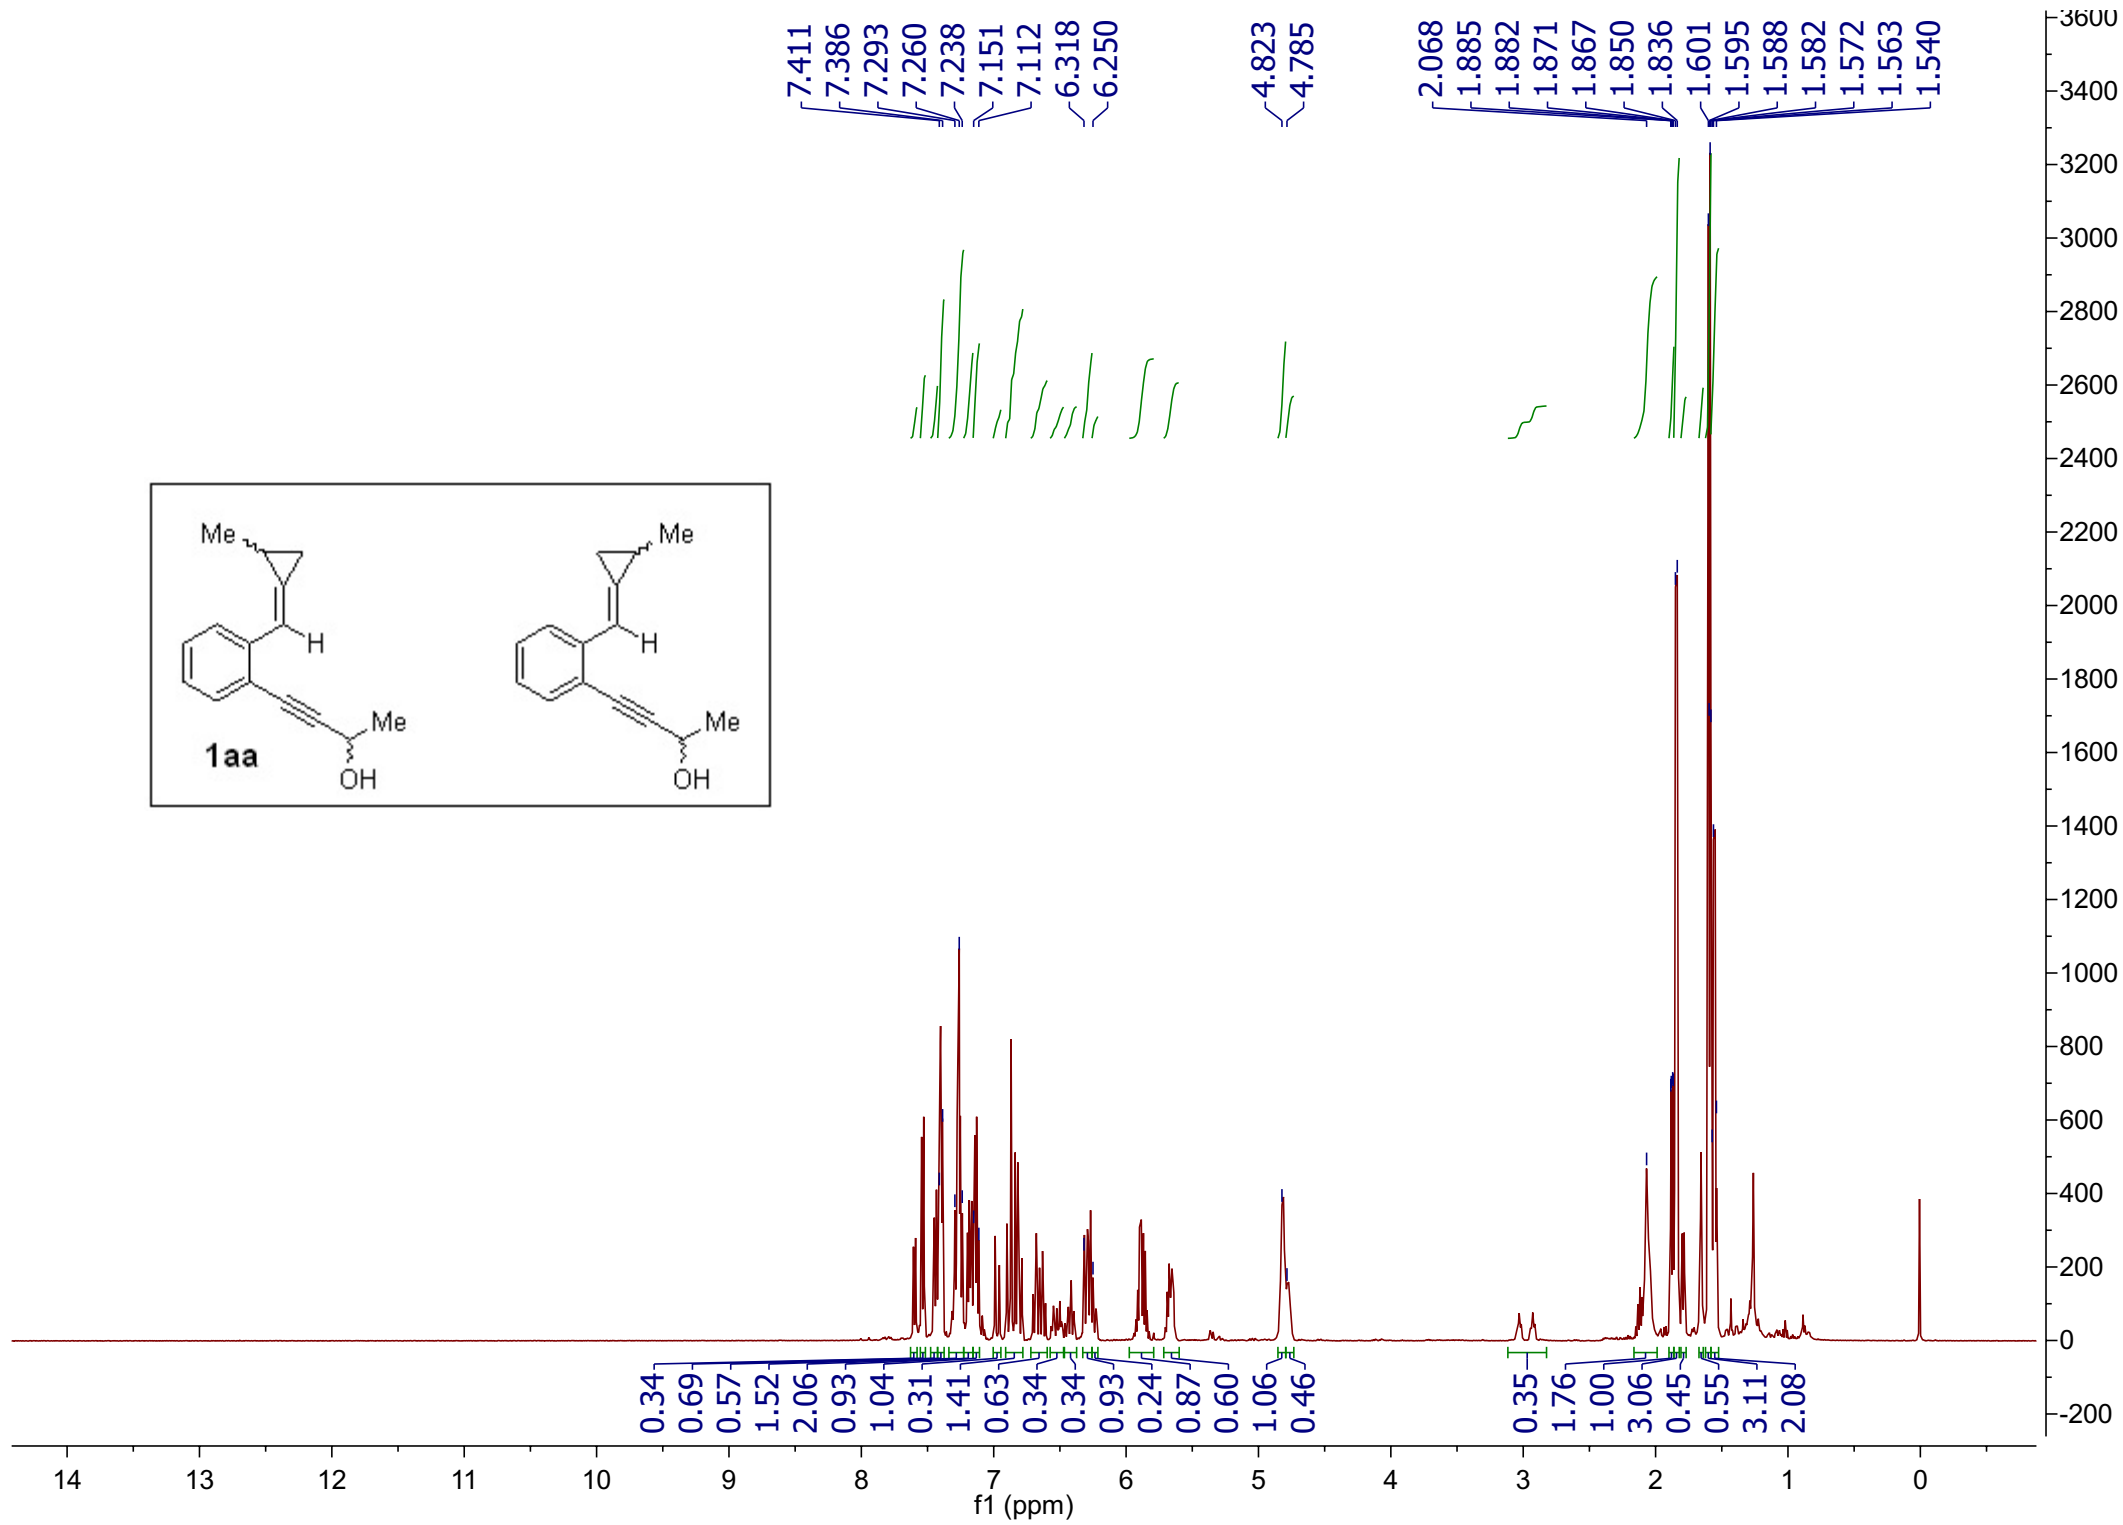



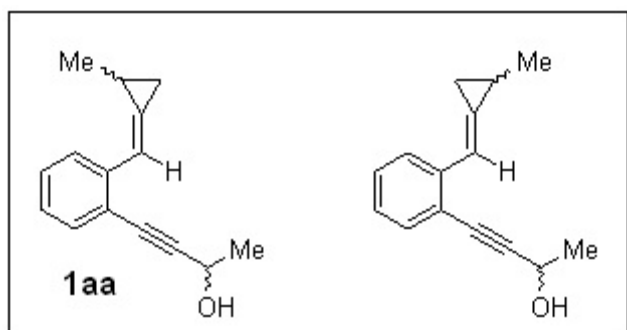

139.24  
132.90  
132.22  
131.20  
128.63  
127.58  
126.75  
124.45

—95.80

77.41  
77.16  
76.91

24.64  
18.52  
13.56

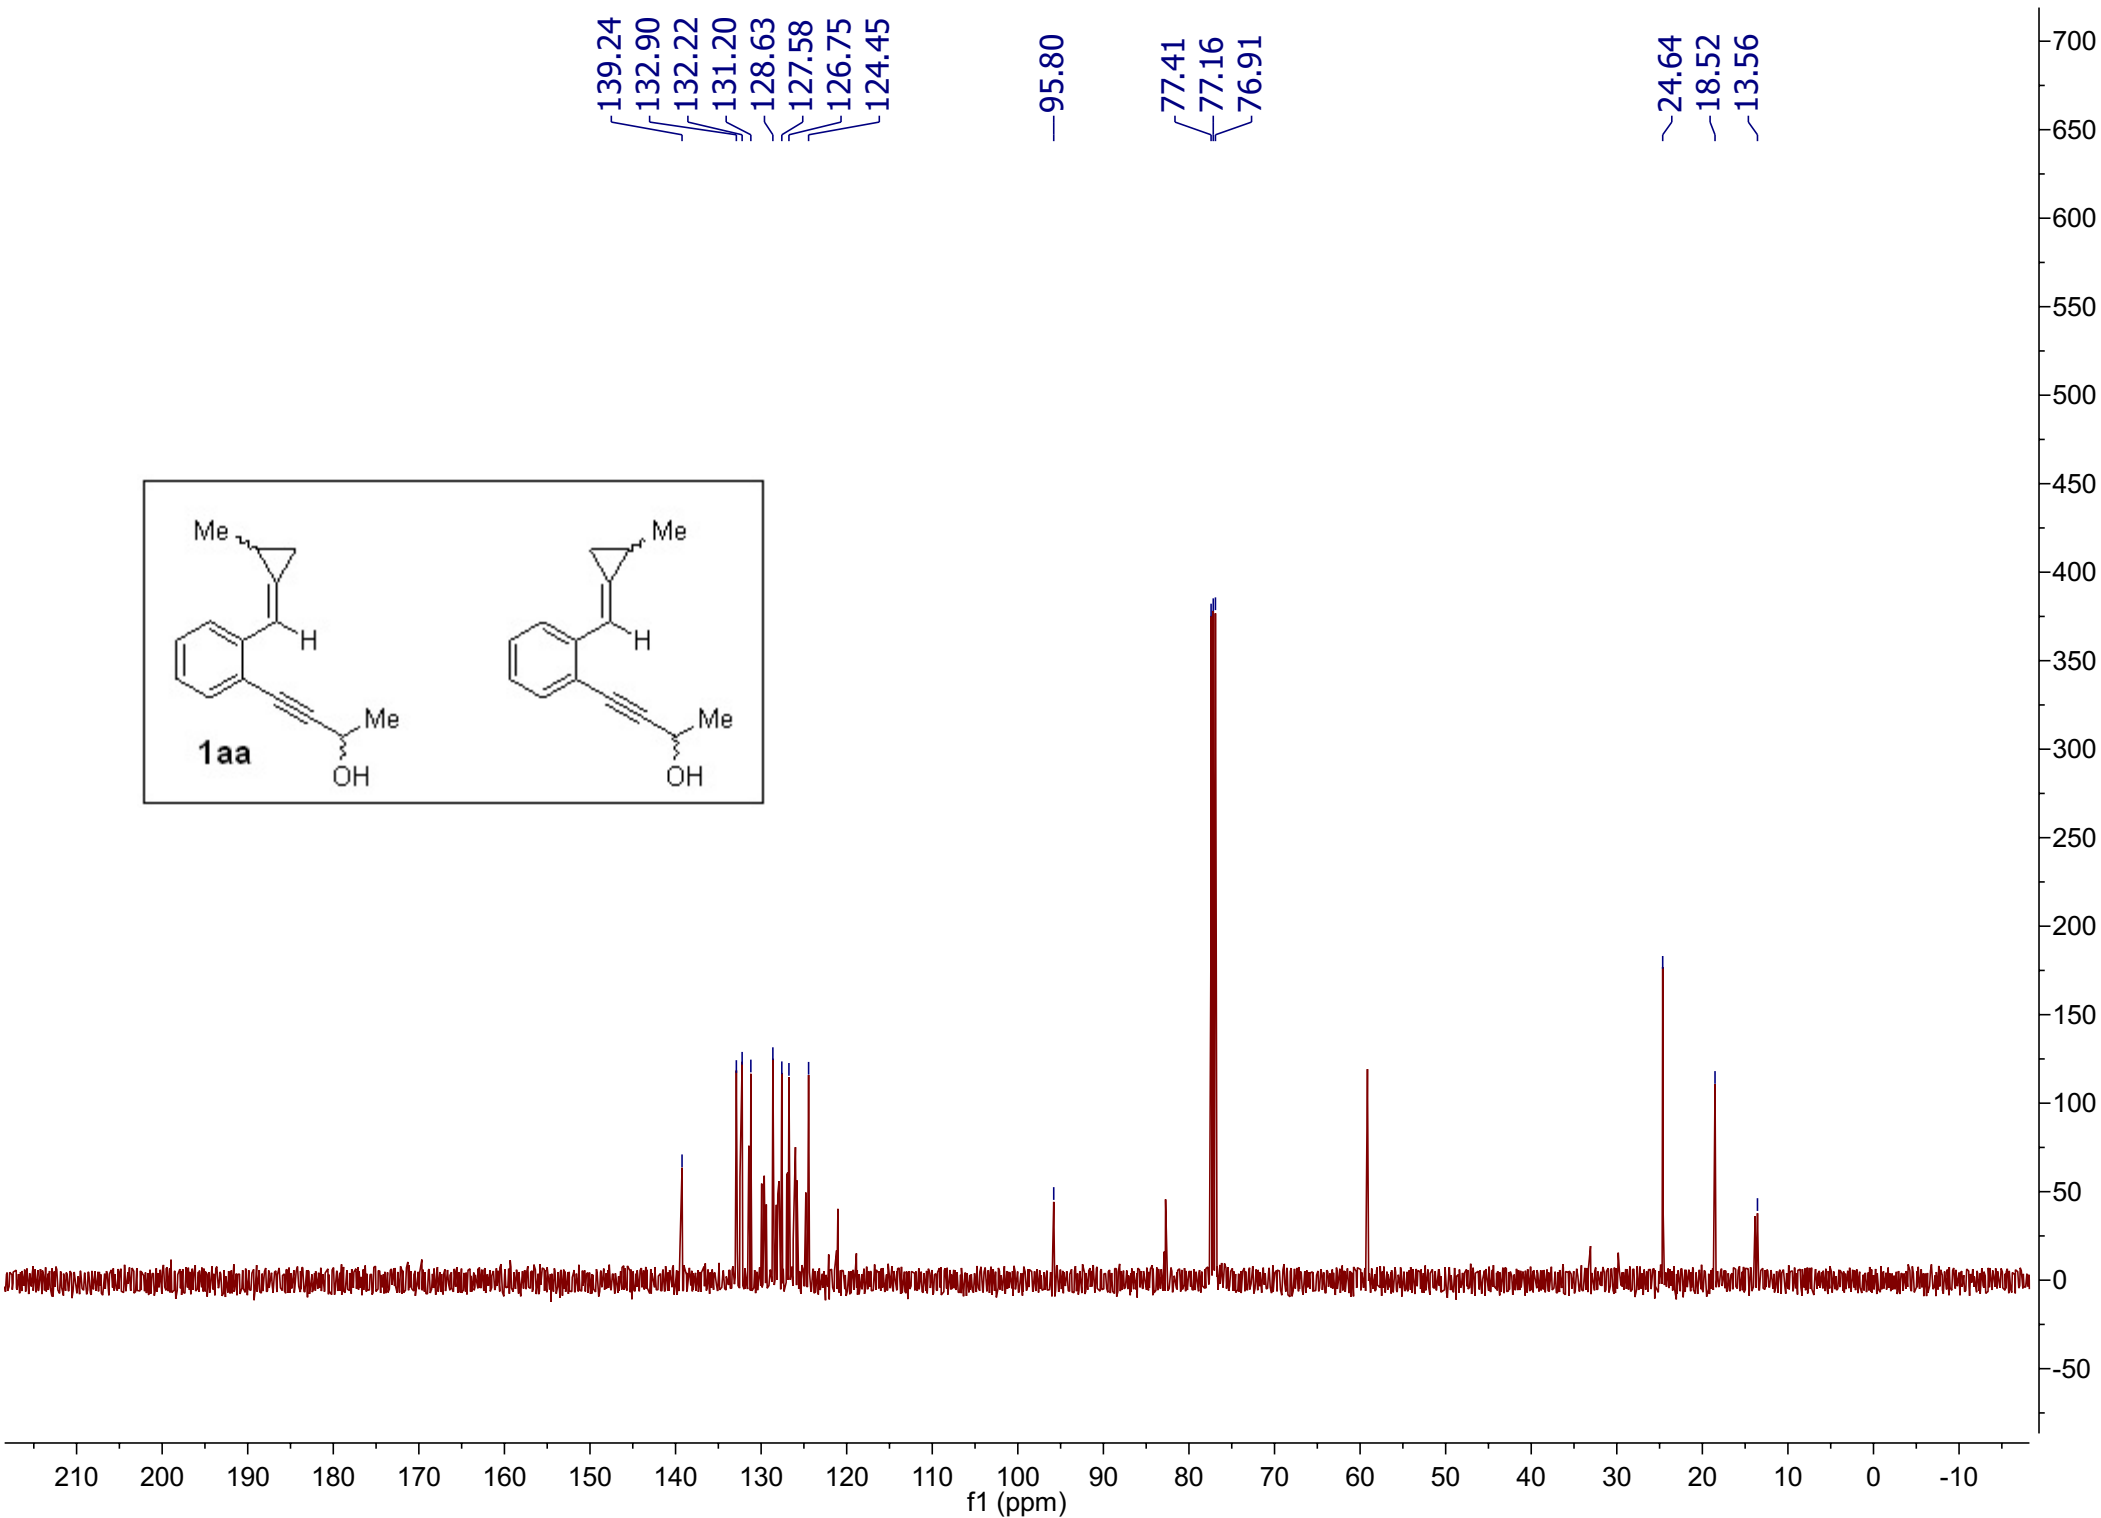

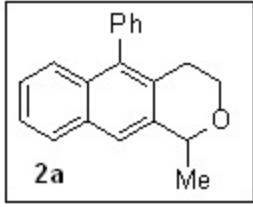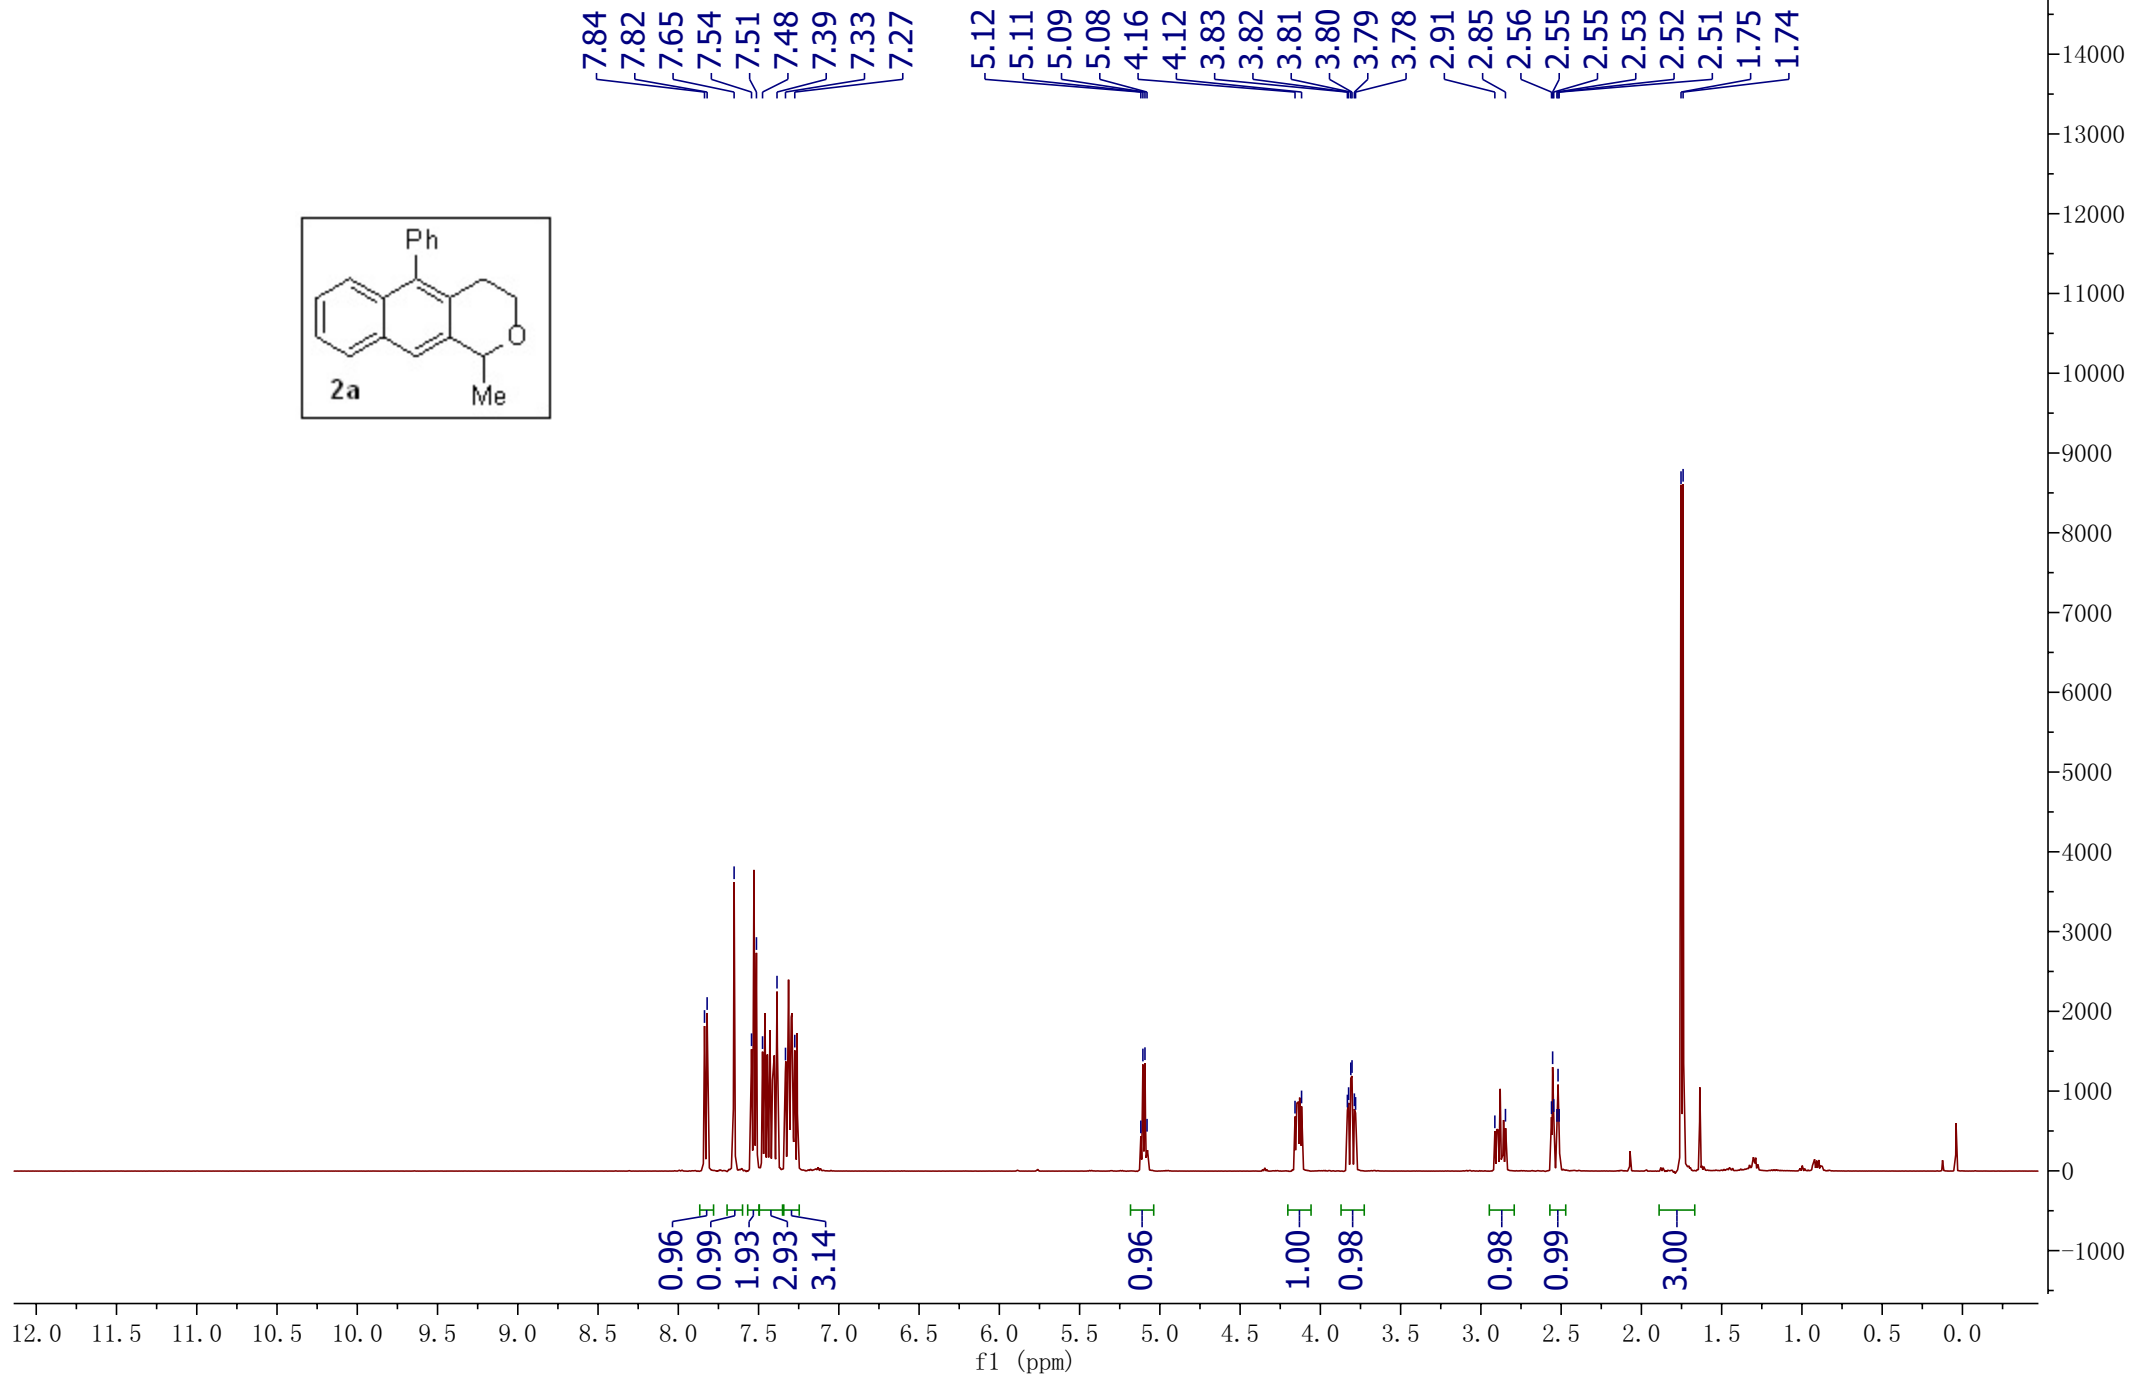

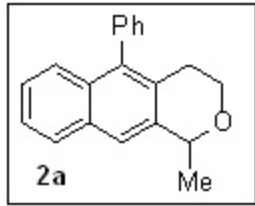

139.17  
138.42  
138.10  
132.05  
131.62  
130.20  
130.03  
128.75  
128.61  
127.72  
127.34  
126.08  
125.65  
125.41  
123.13

77.41 CDC13  
77.16 CDC13  
76.91 CDC13  
73.13  
64.25

28.89  
22.41

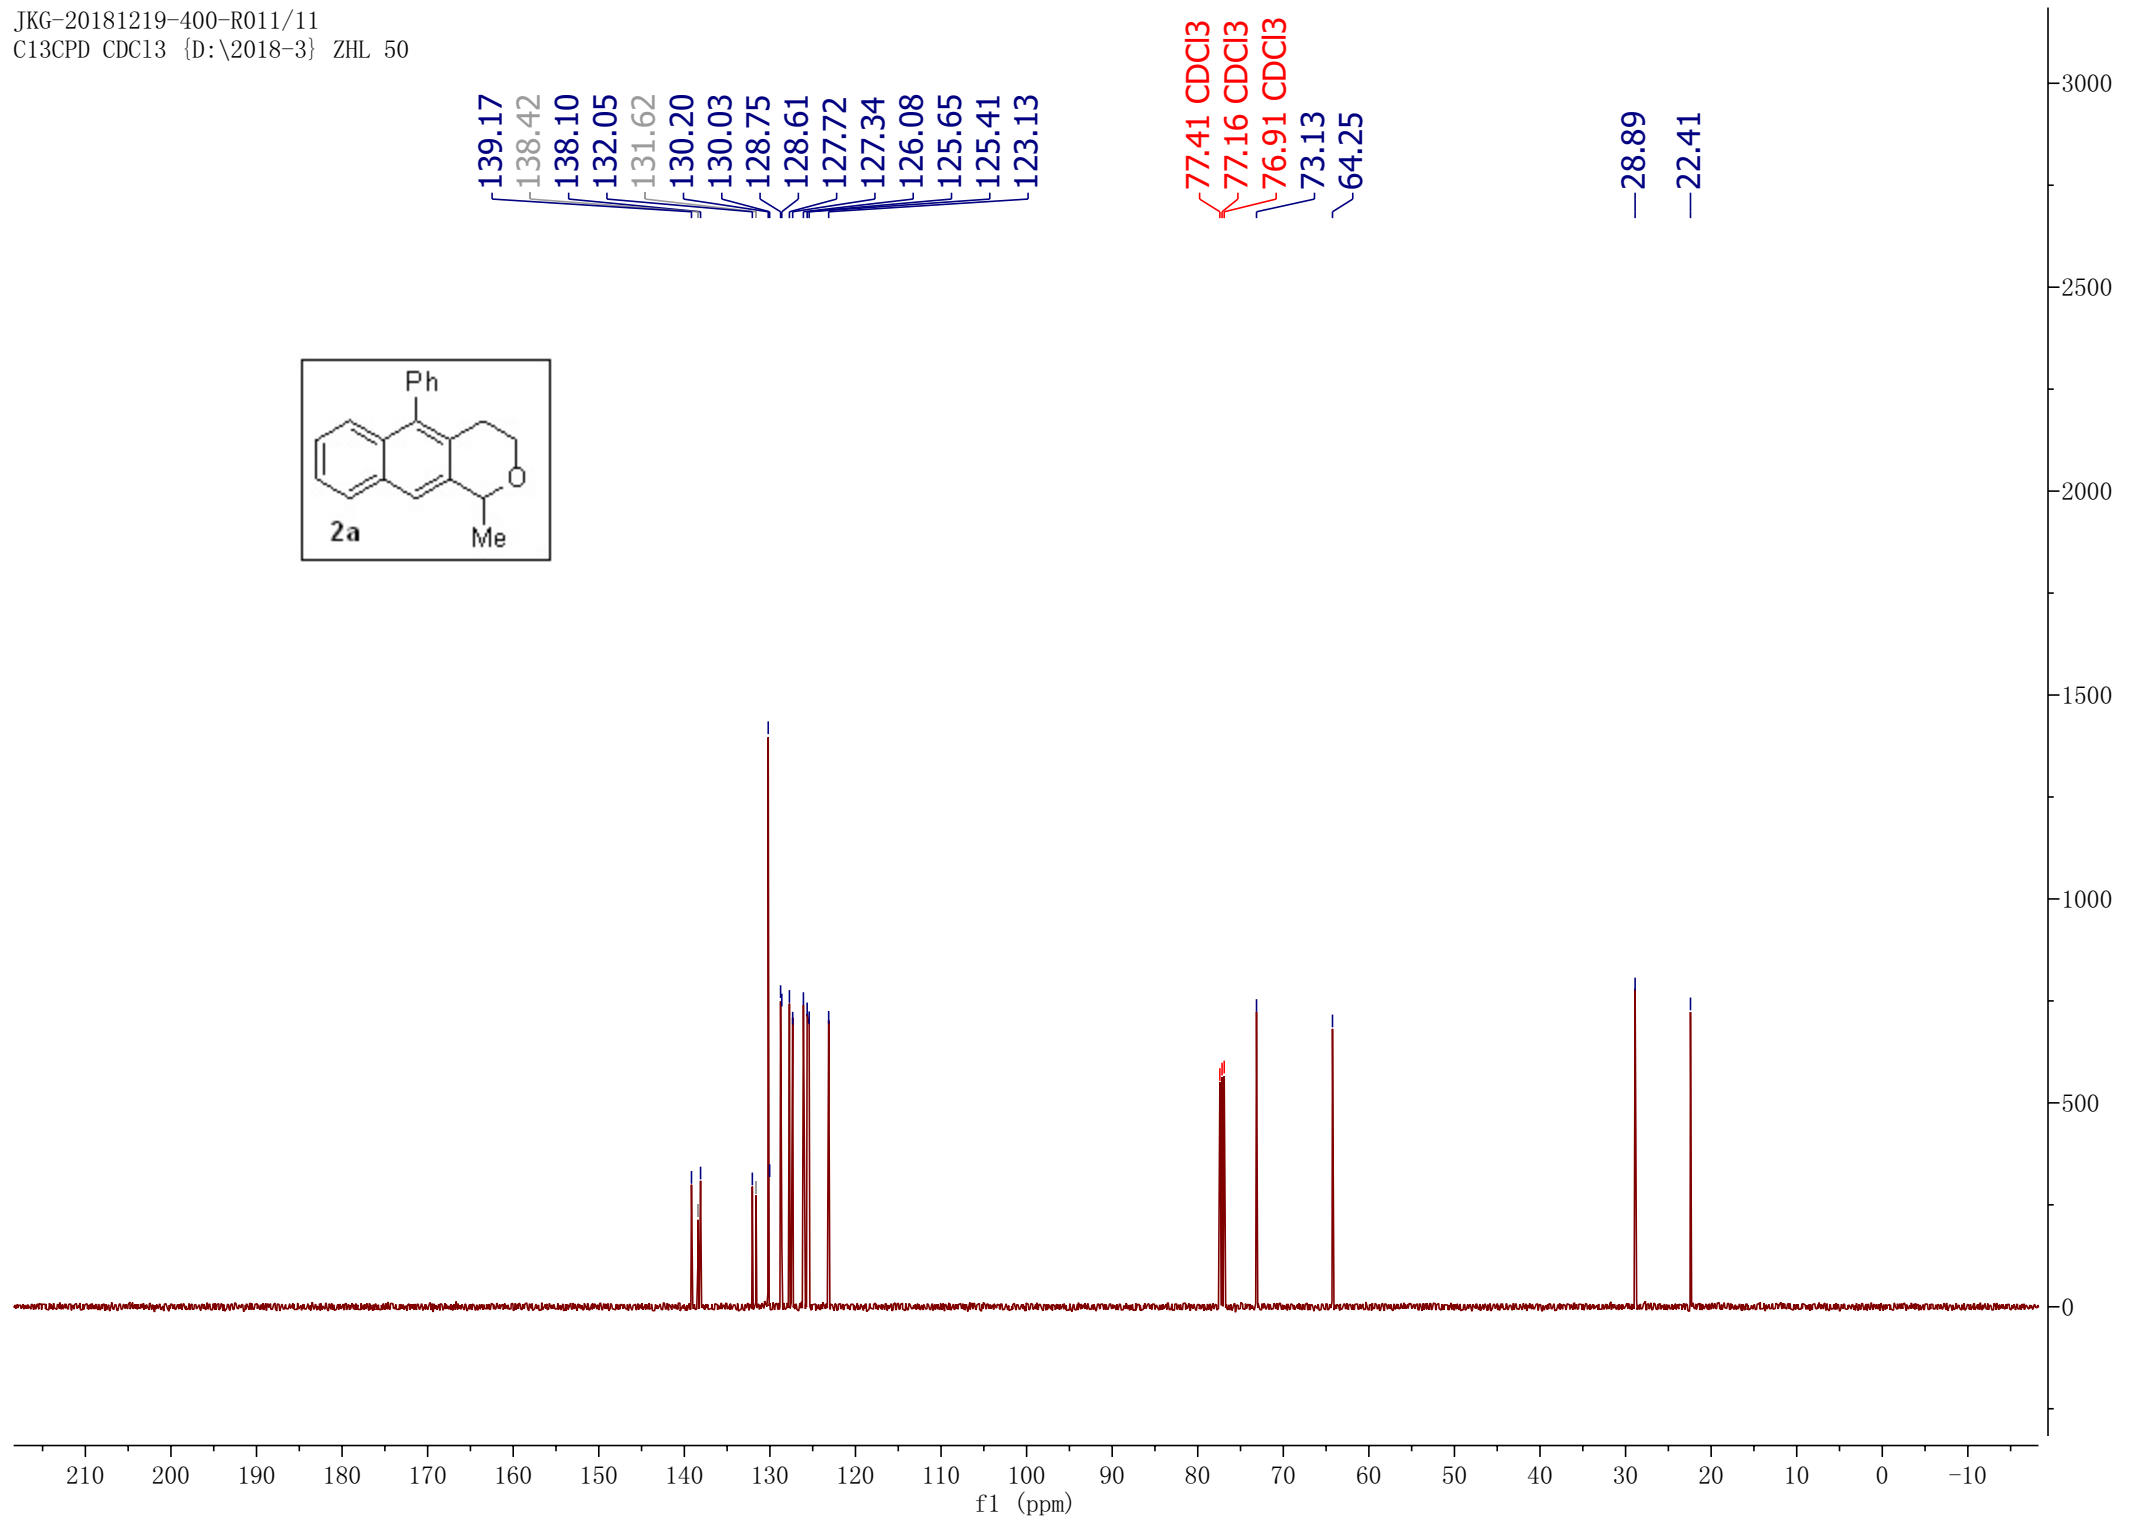

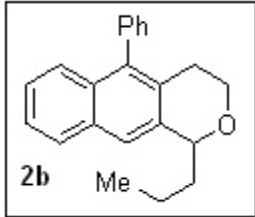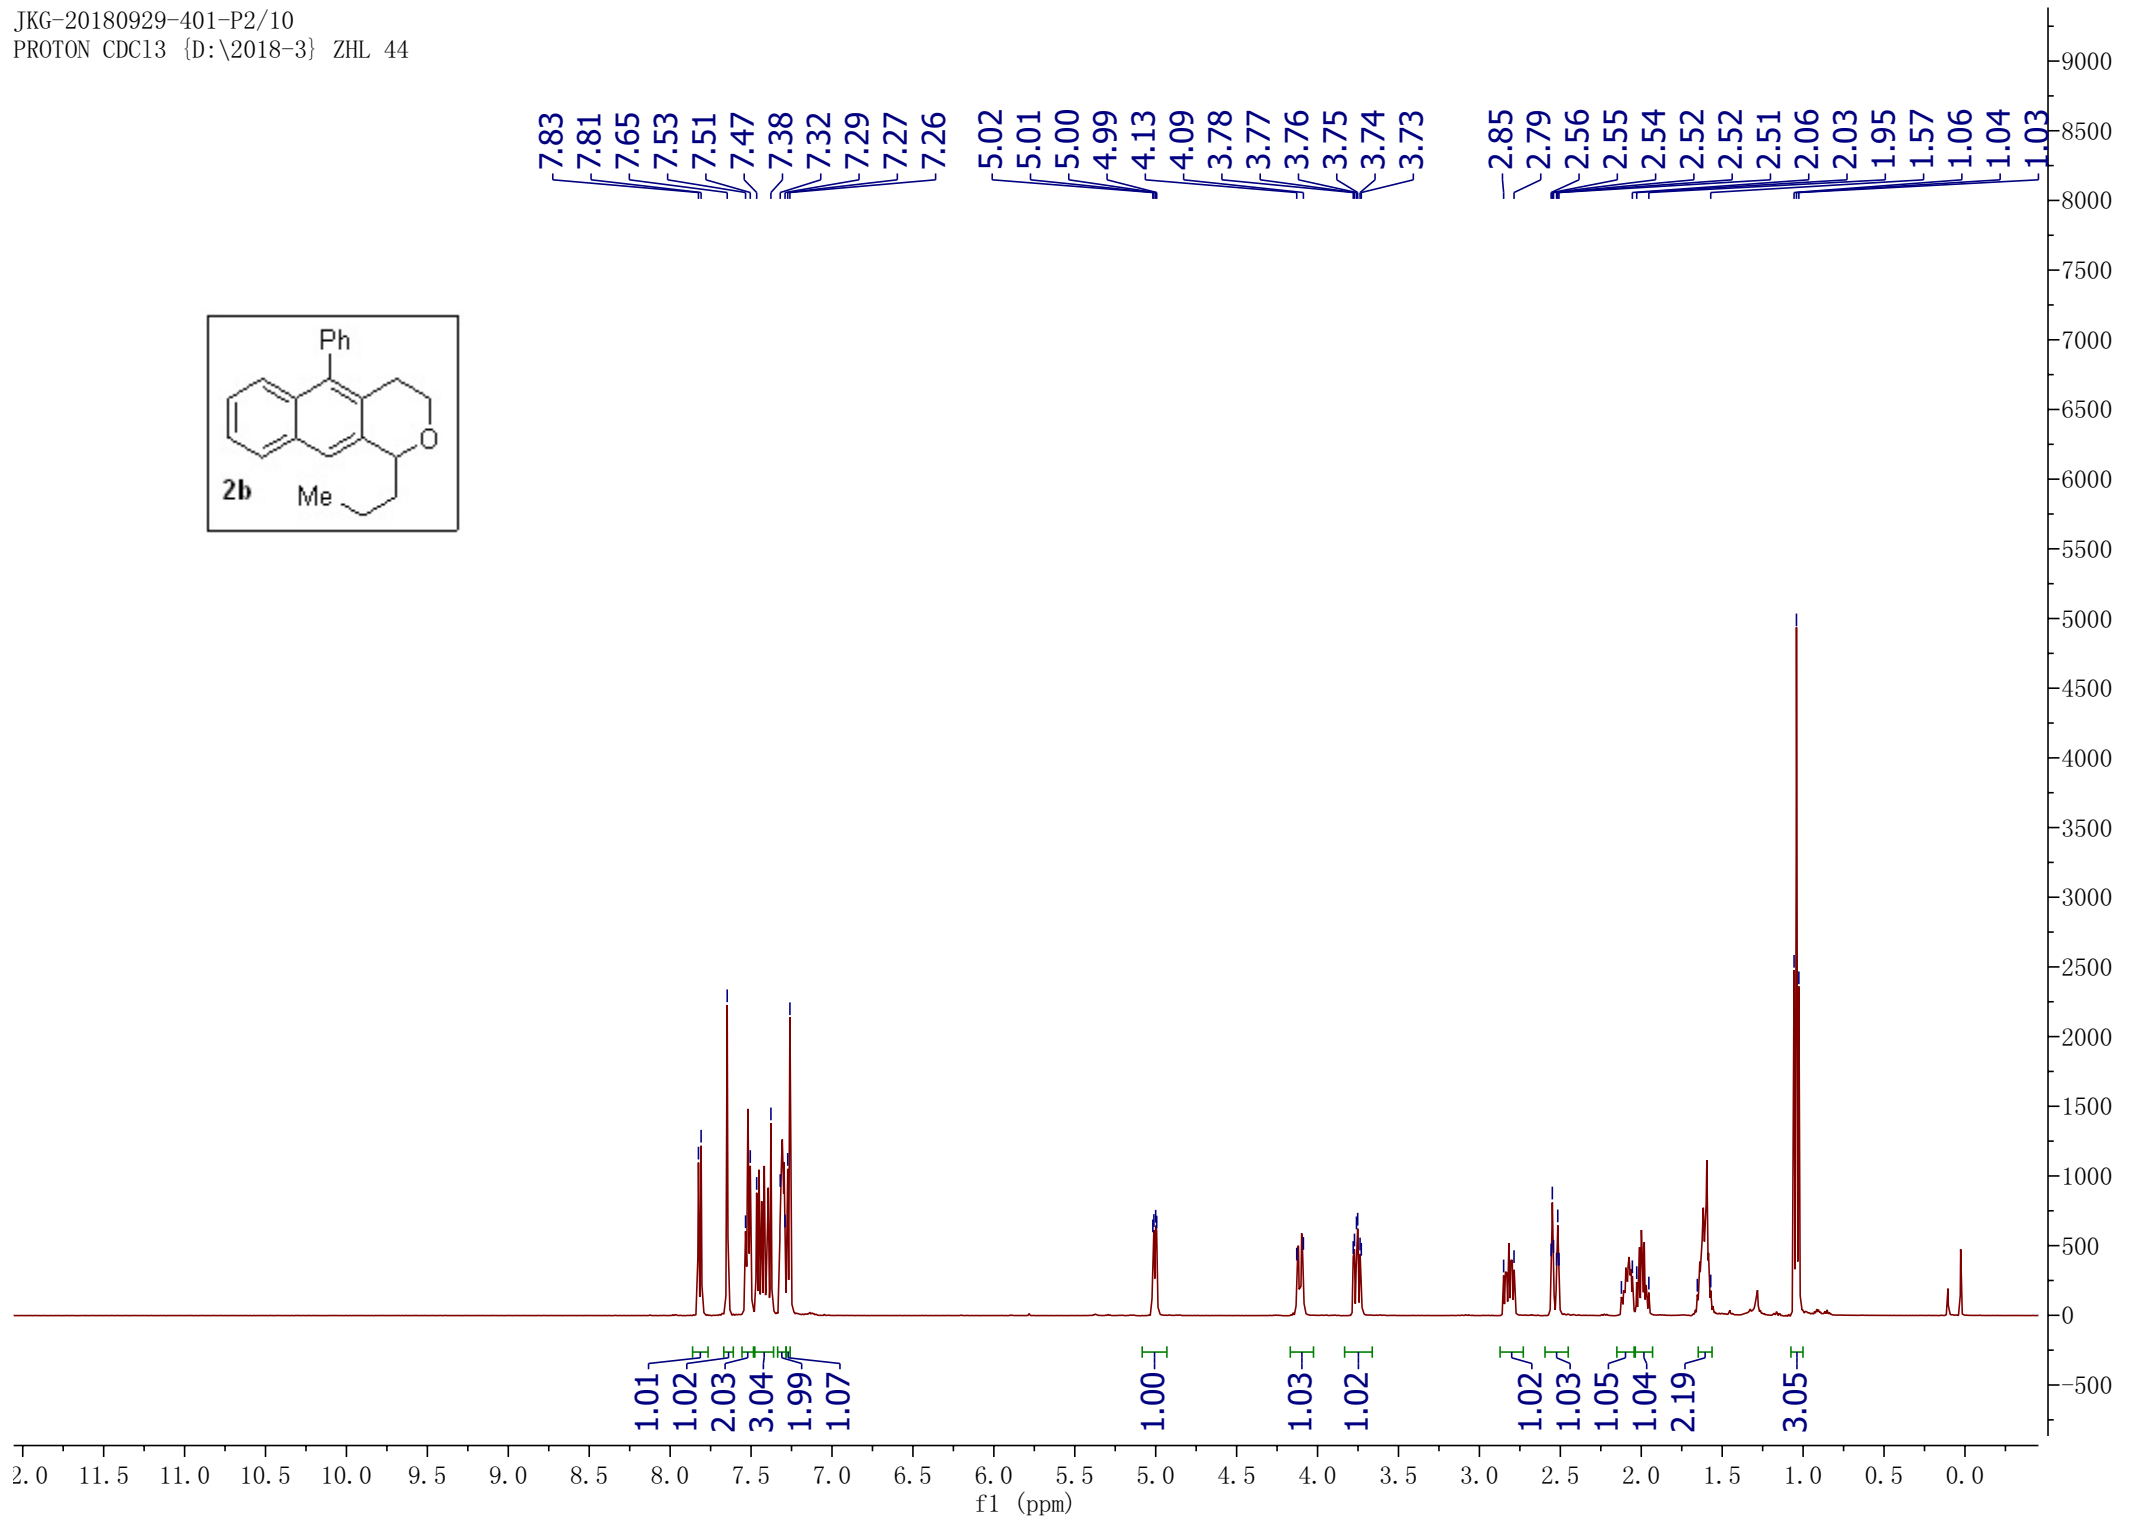

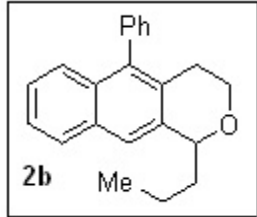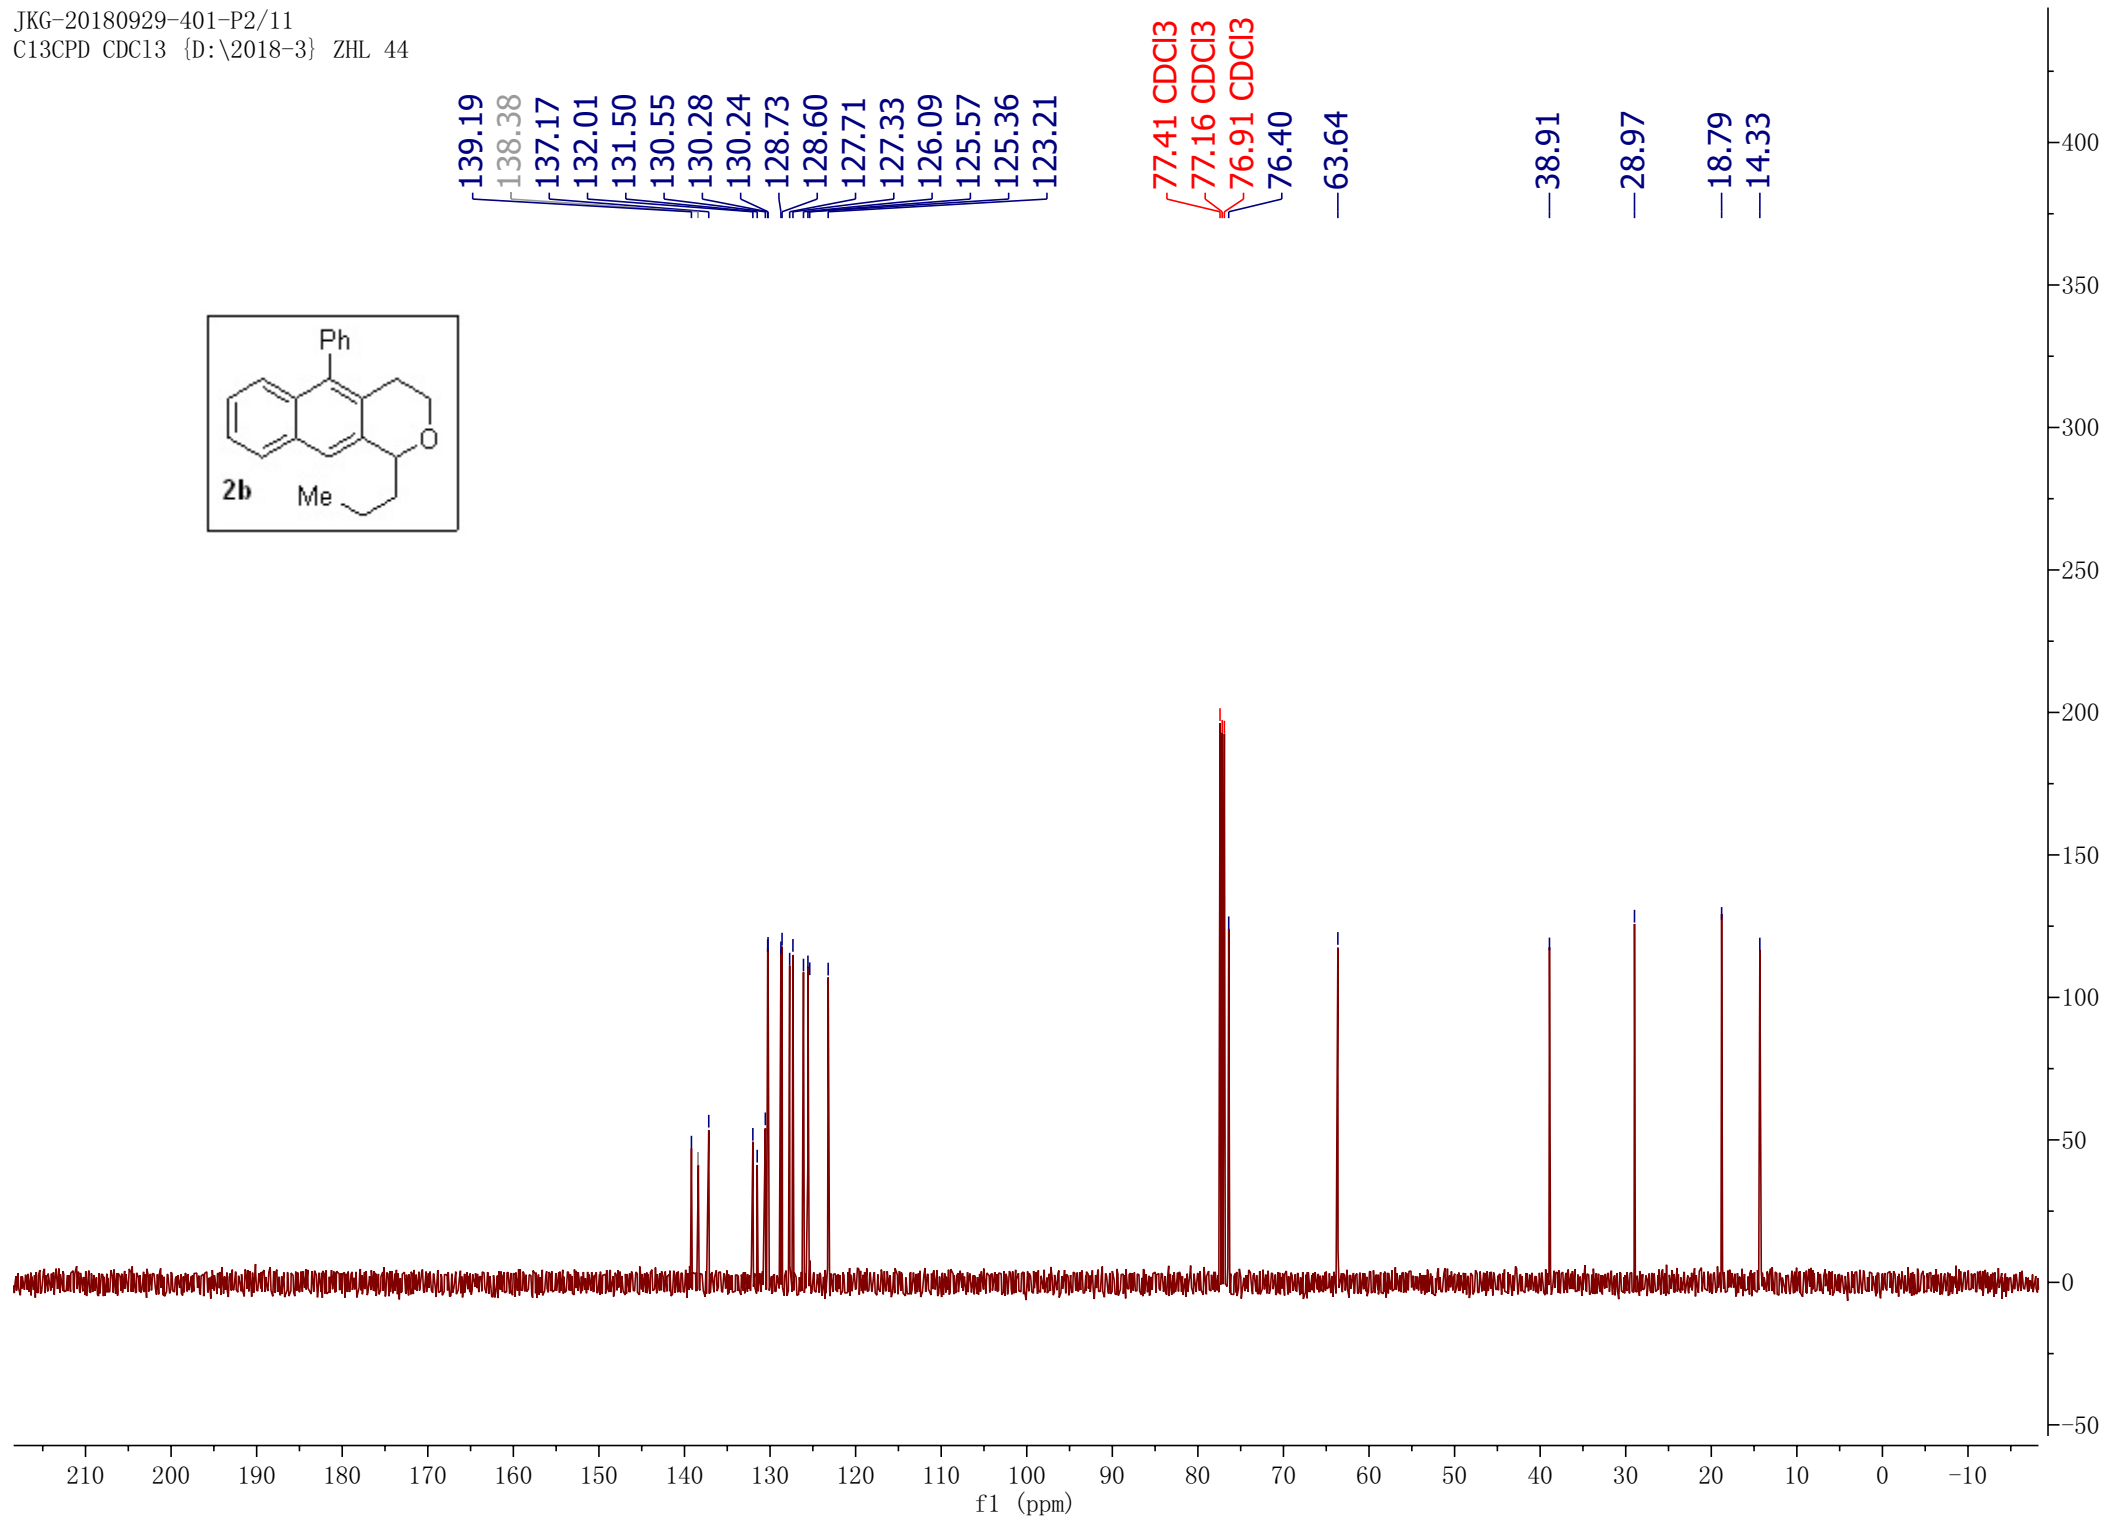

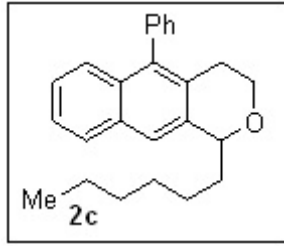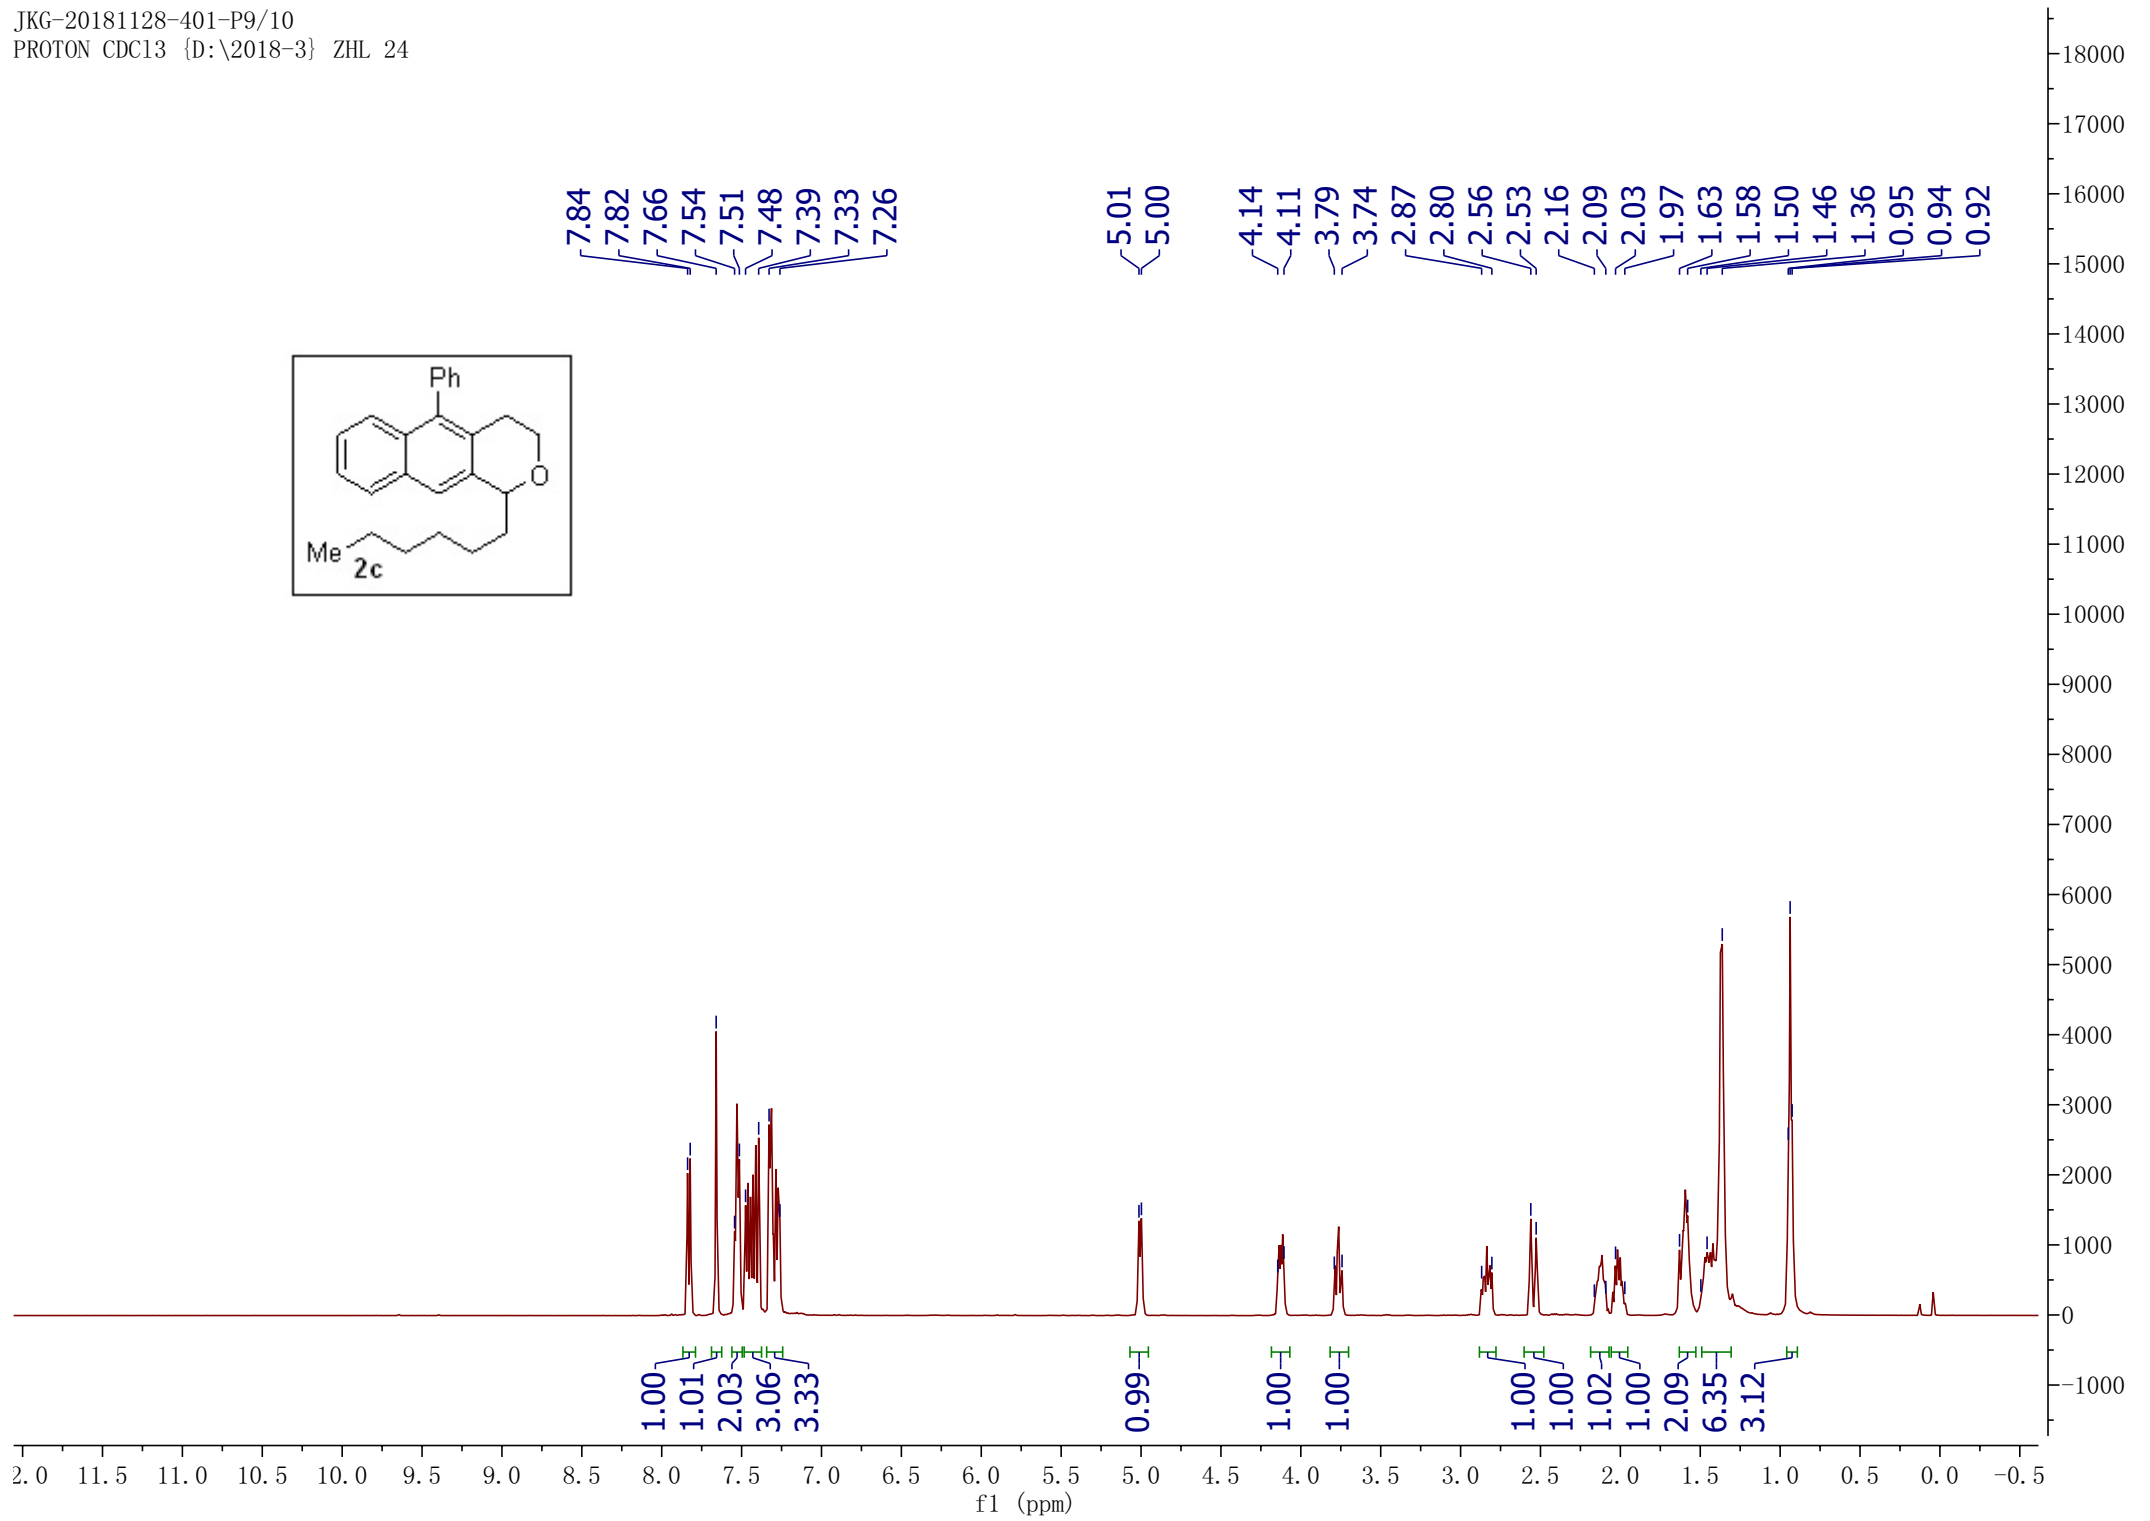

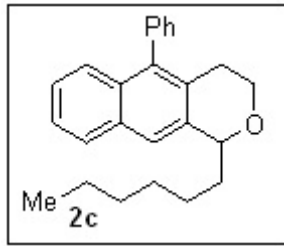

139.17  
138.37  
137.15  
131.99  
131.48  
130.53  
130.26  
130.22  
128.72  
128.59  
127.71  
127.31  
126.08  
125.56  
125.35  
123.20

77.41 CDC13  
77.16 CDC13  
76.91 CDC13  
76.65

63.66

36.77  
32.04  
29.62  
28.96  
25.54  
22.84  
14.28

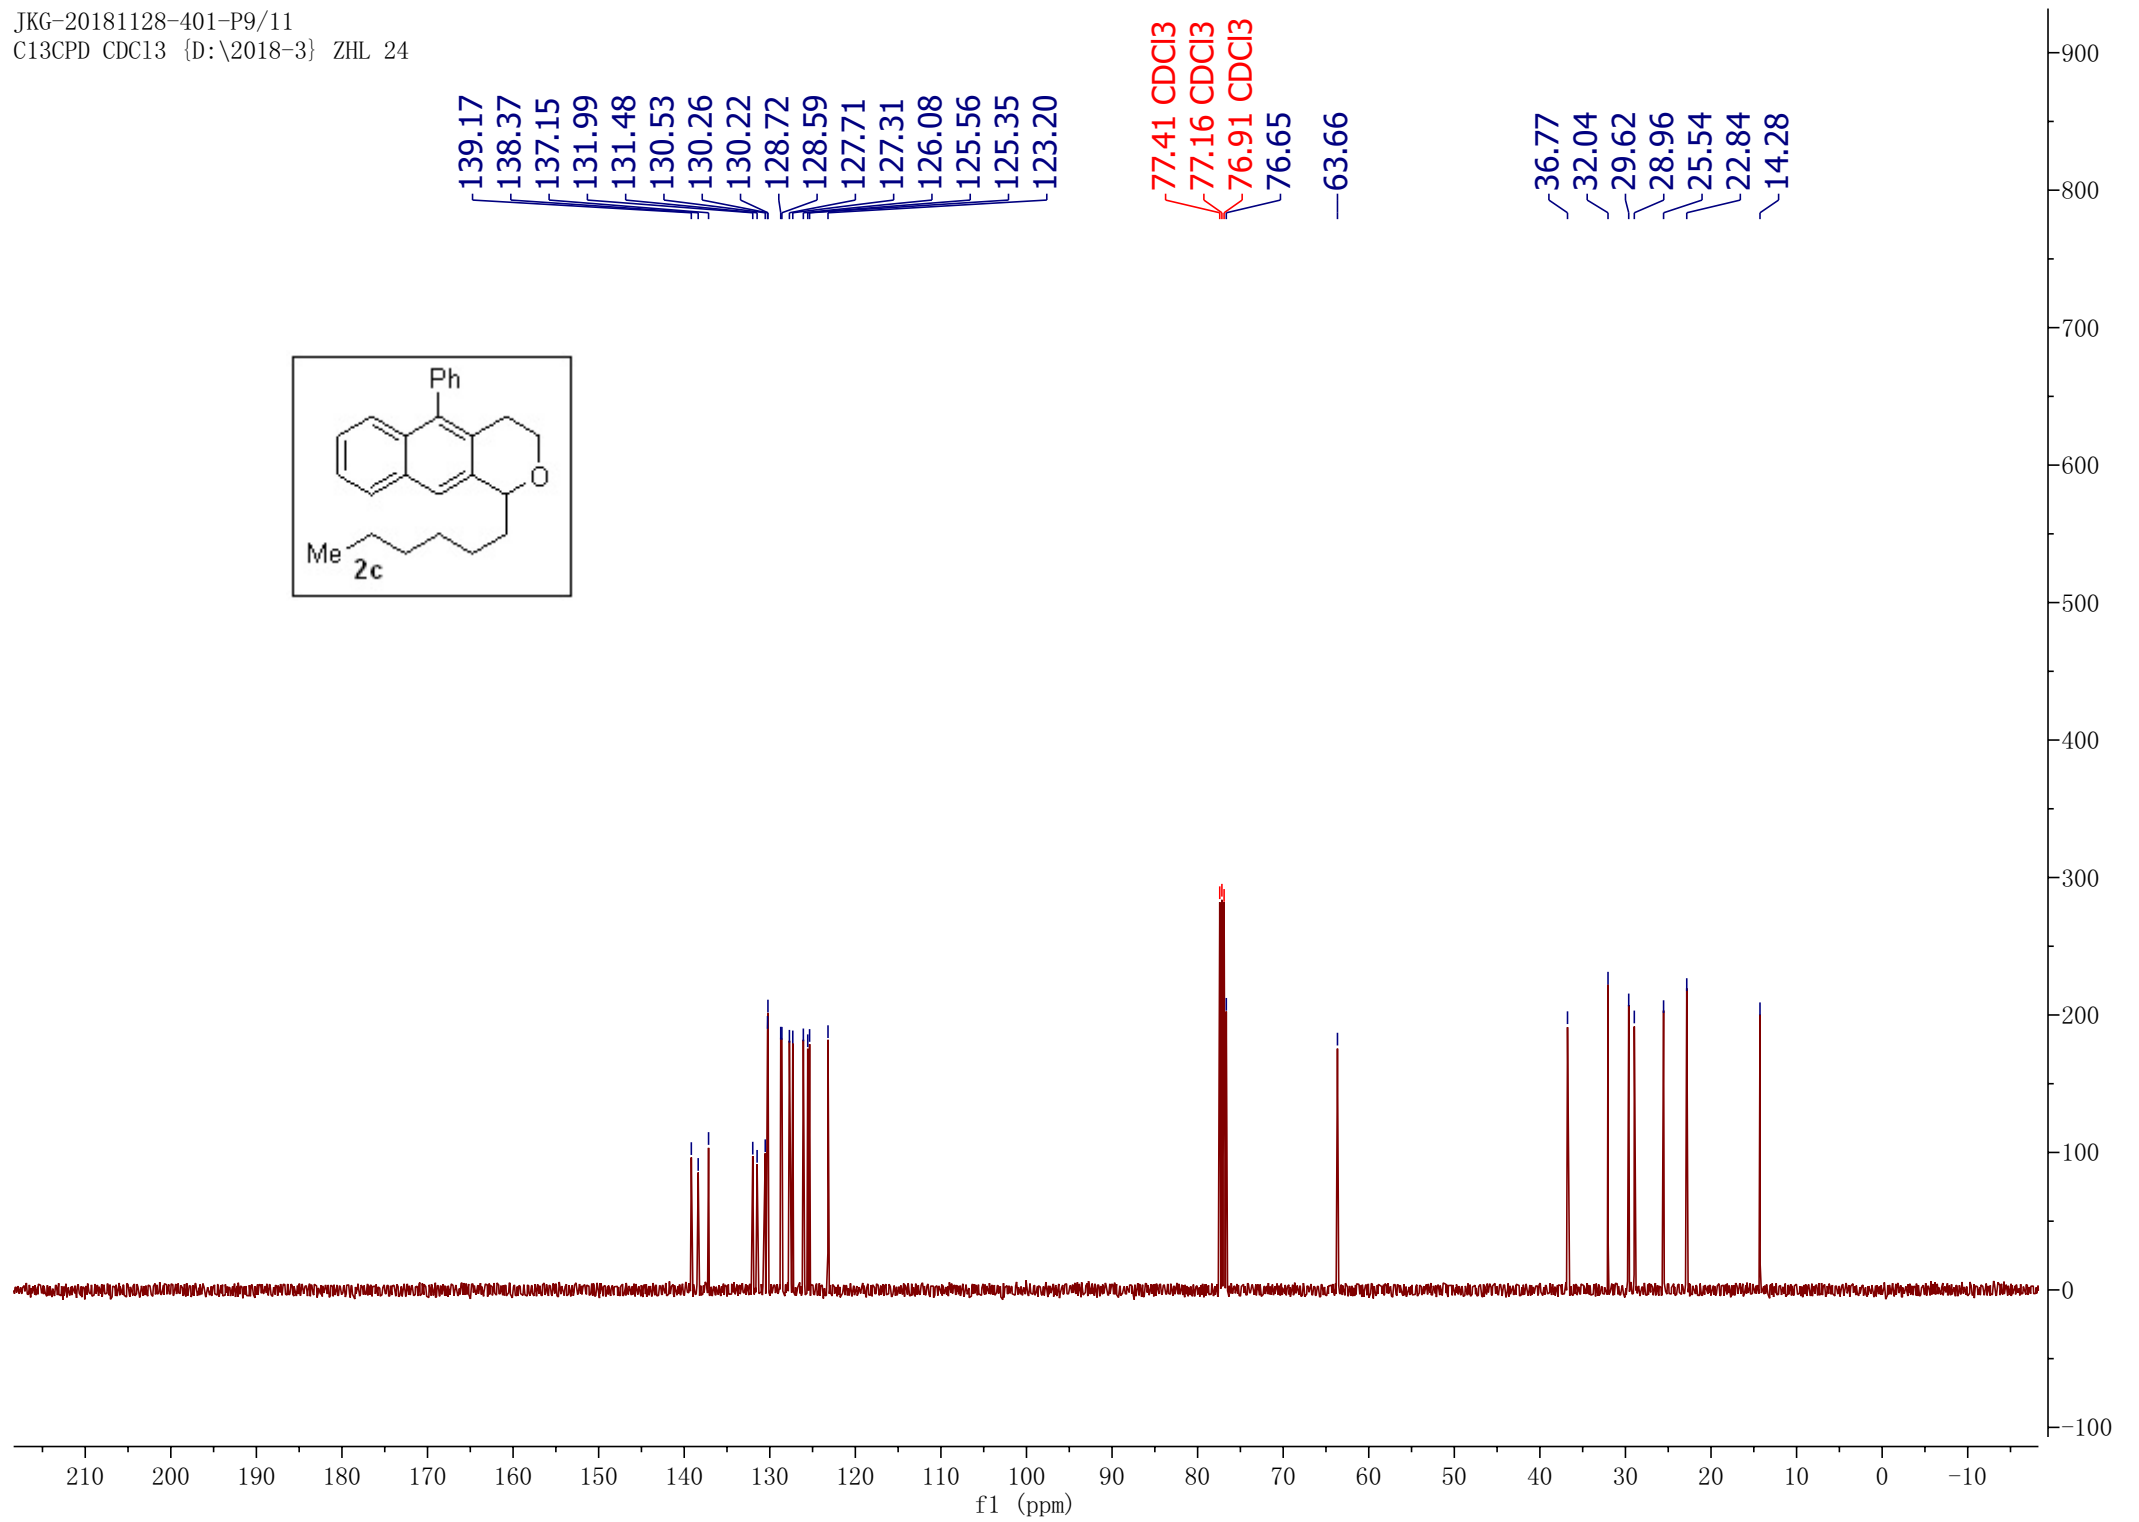

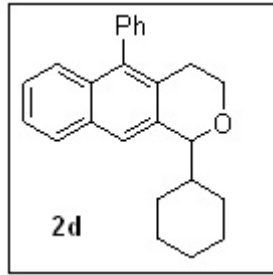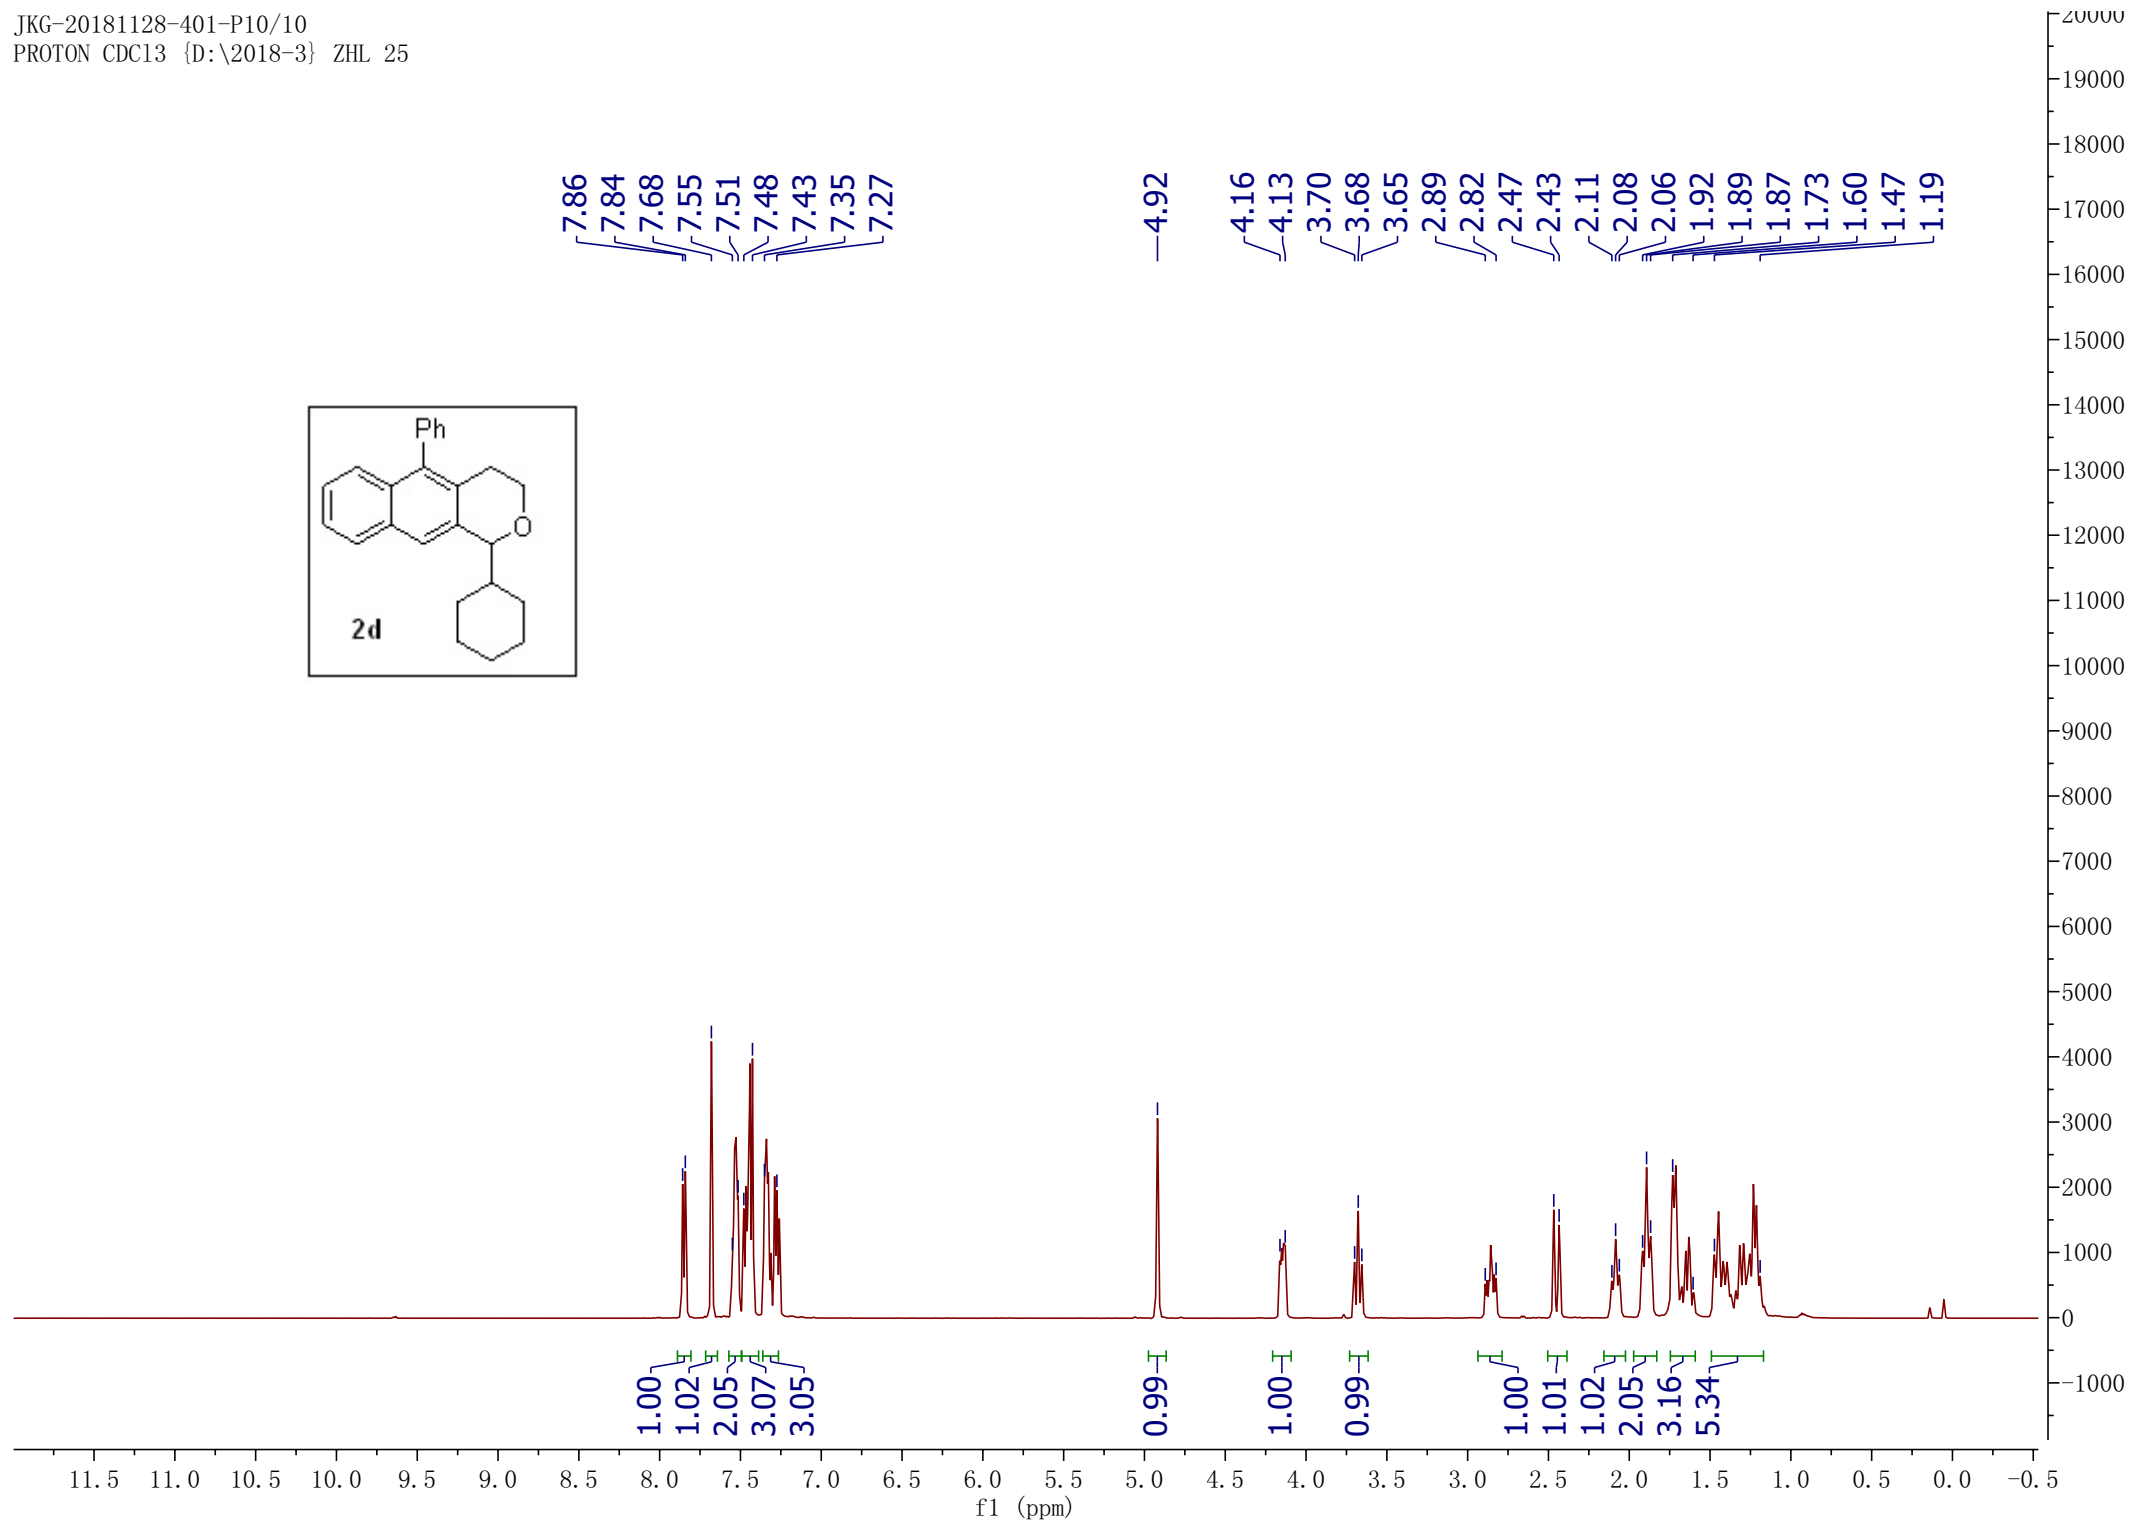



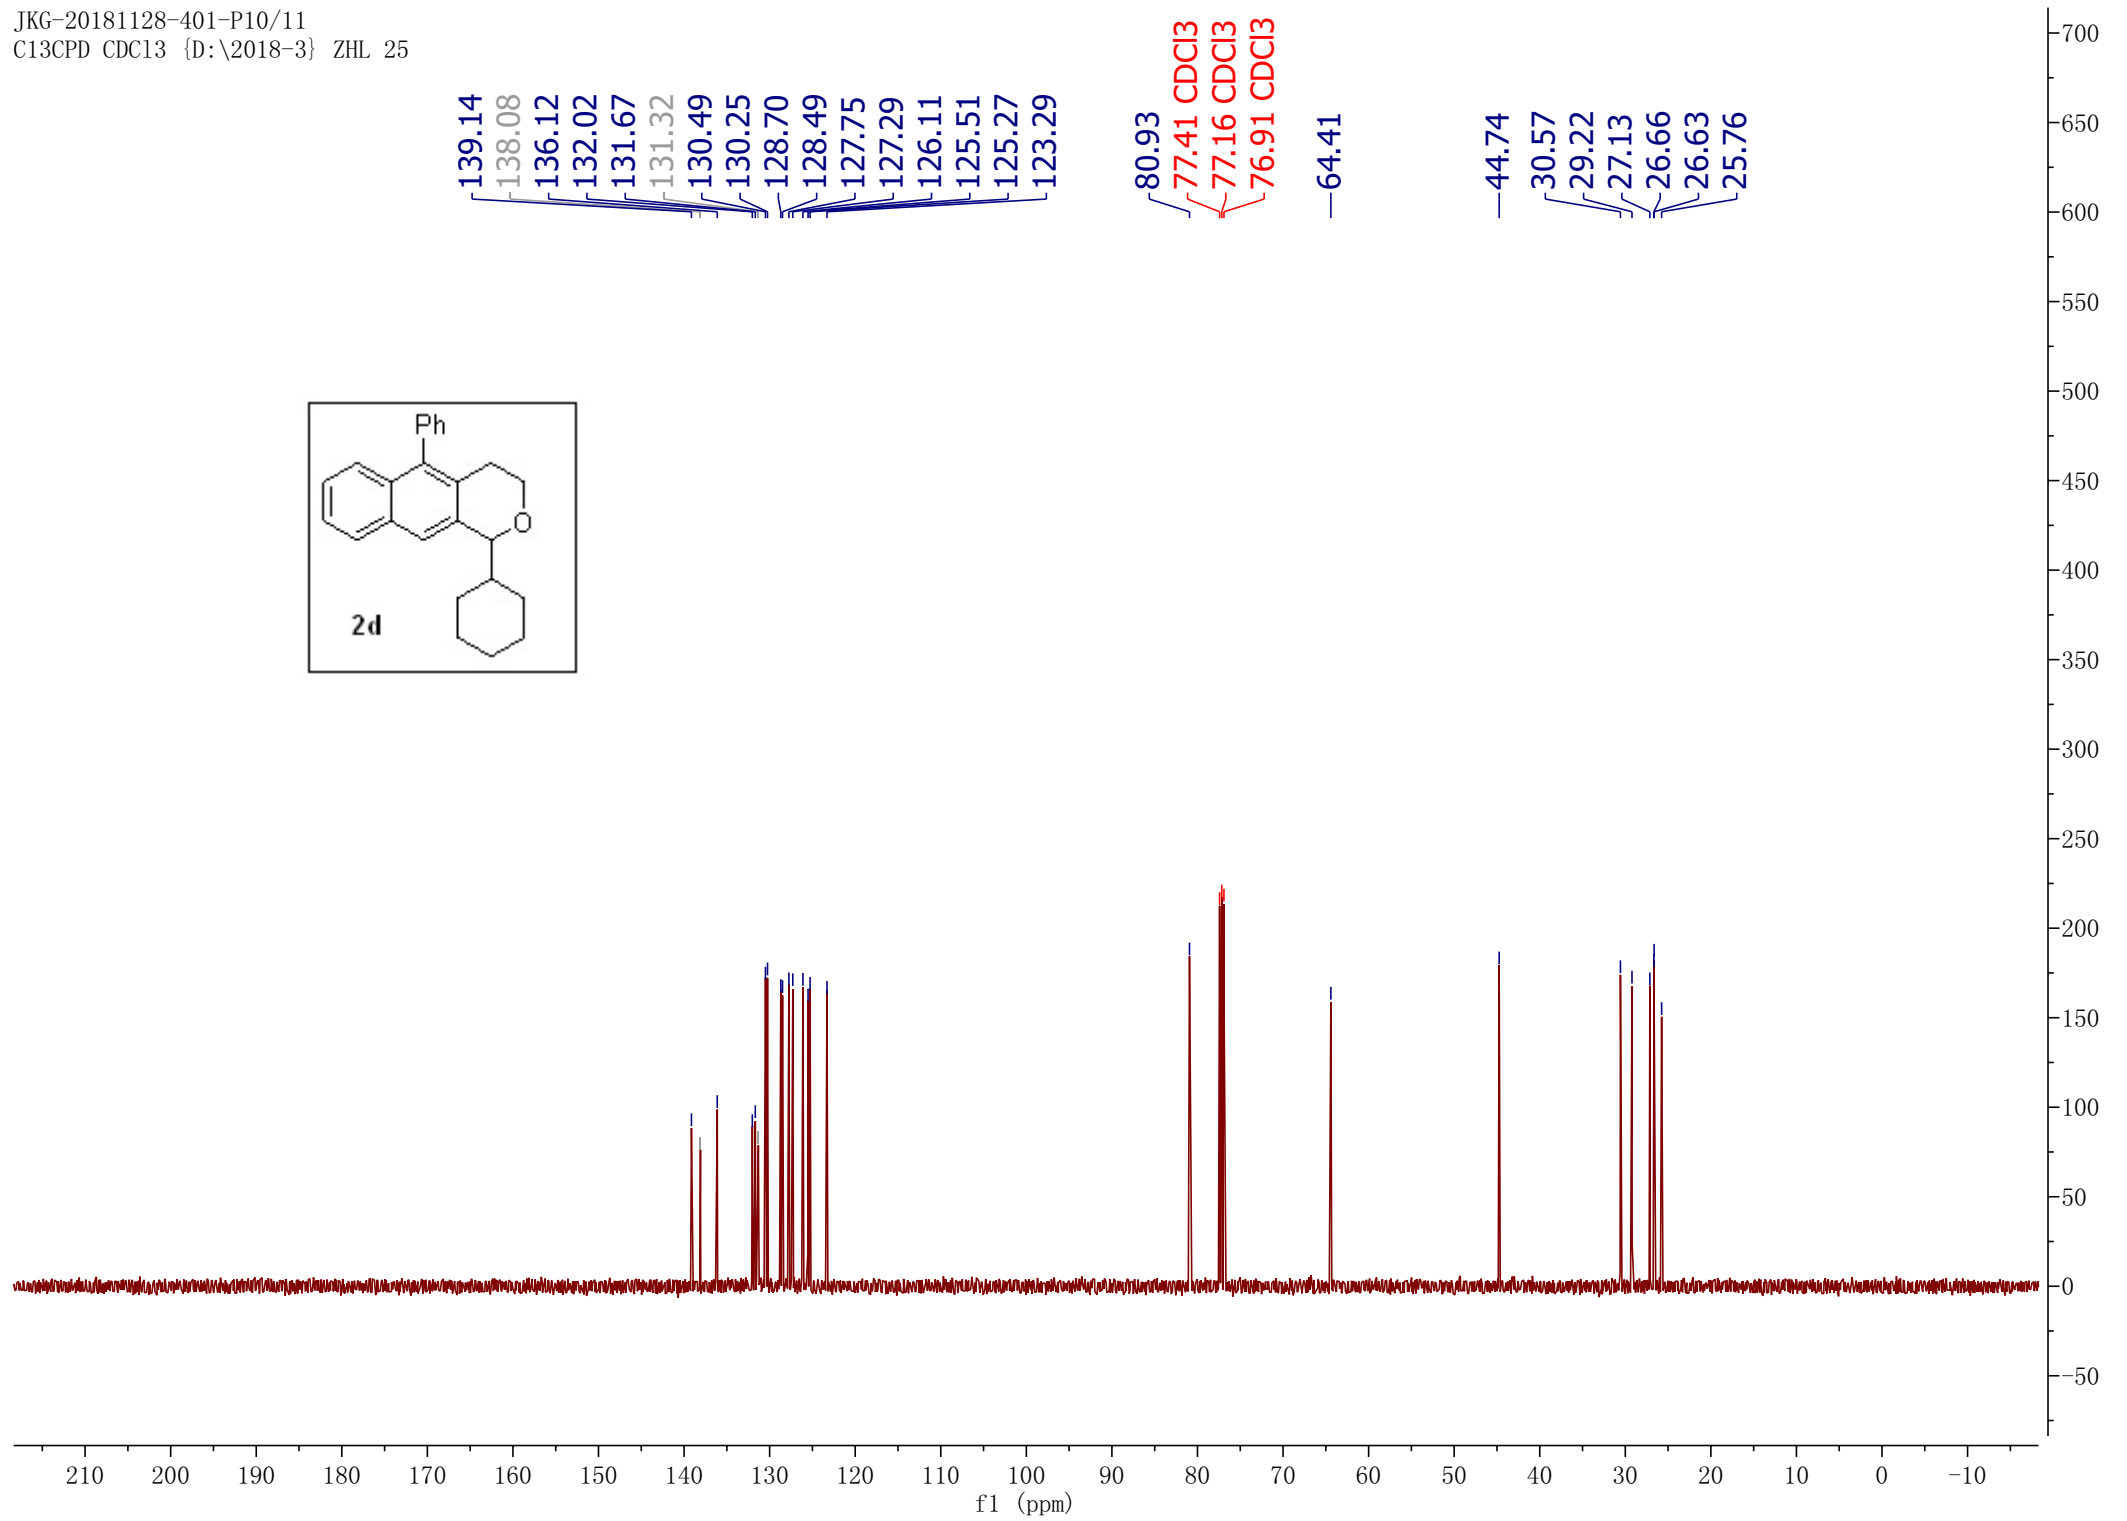

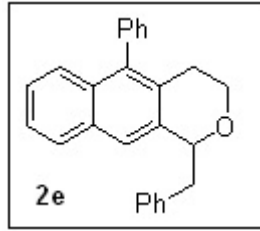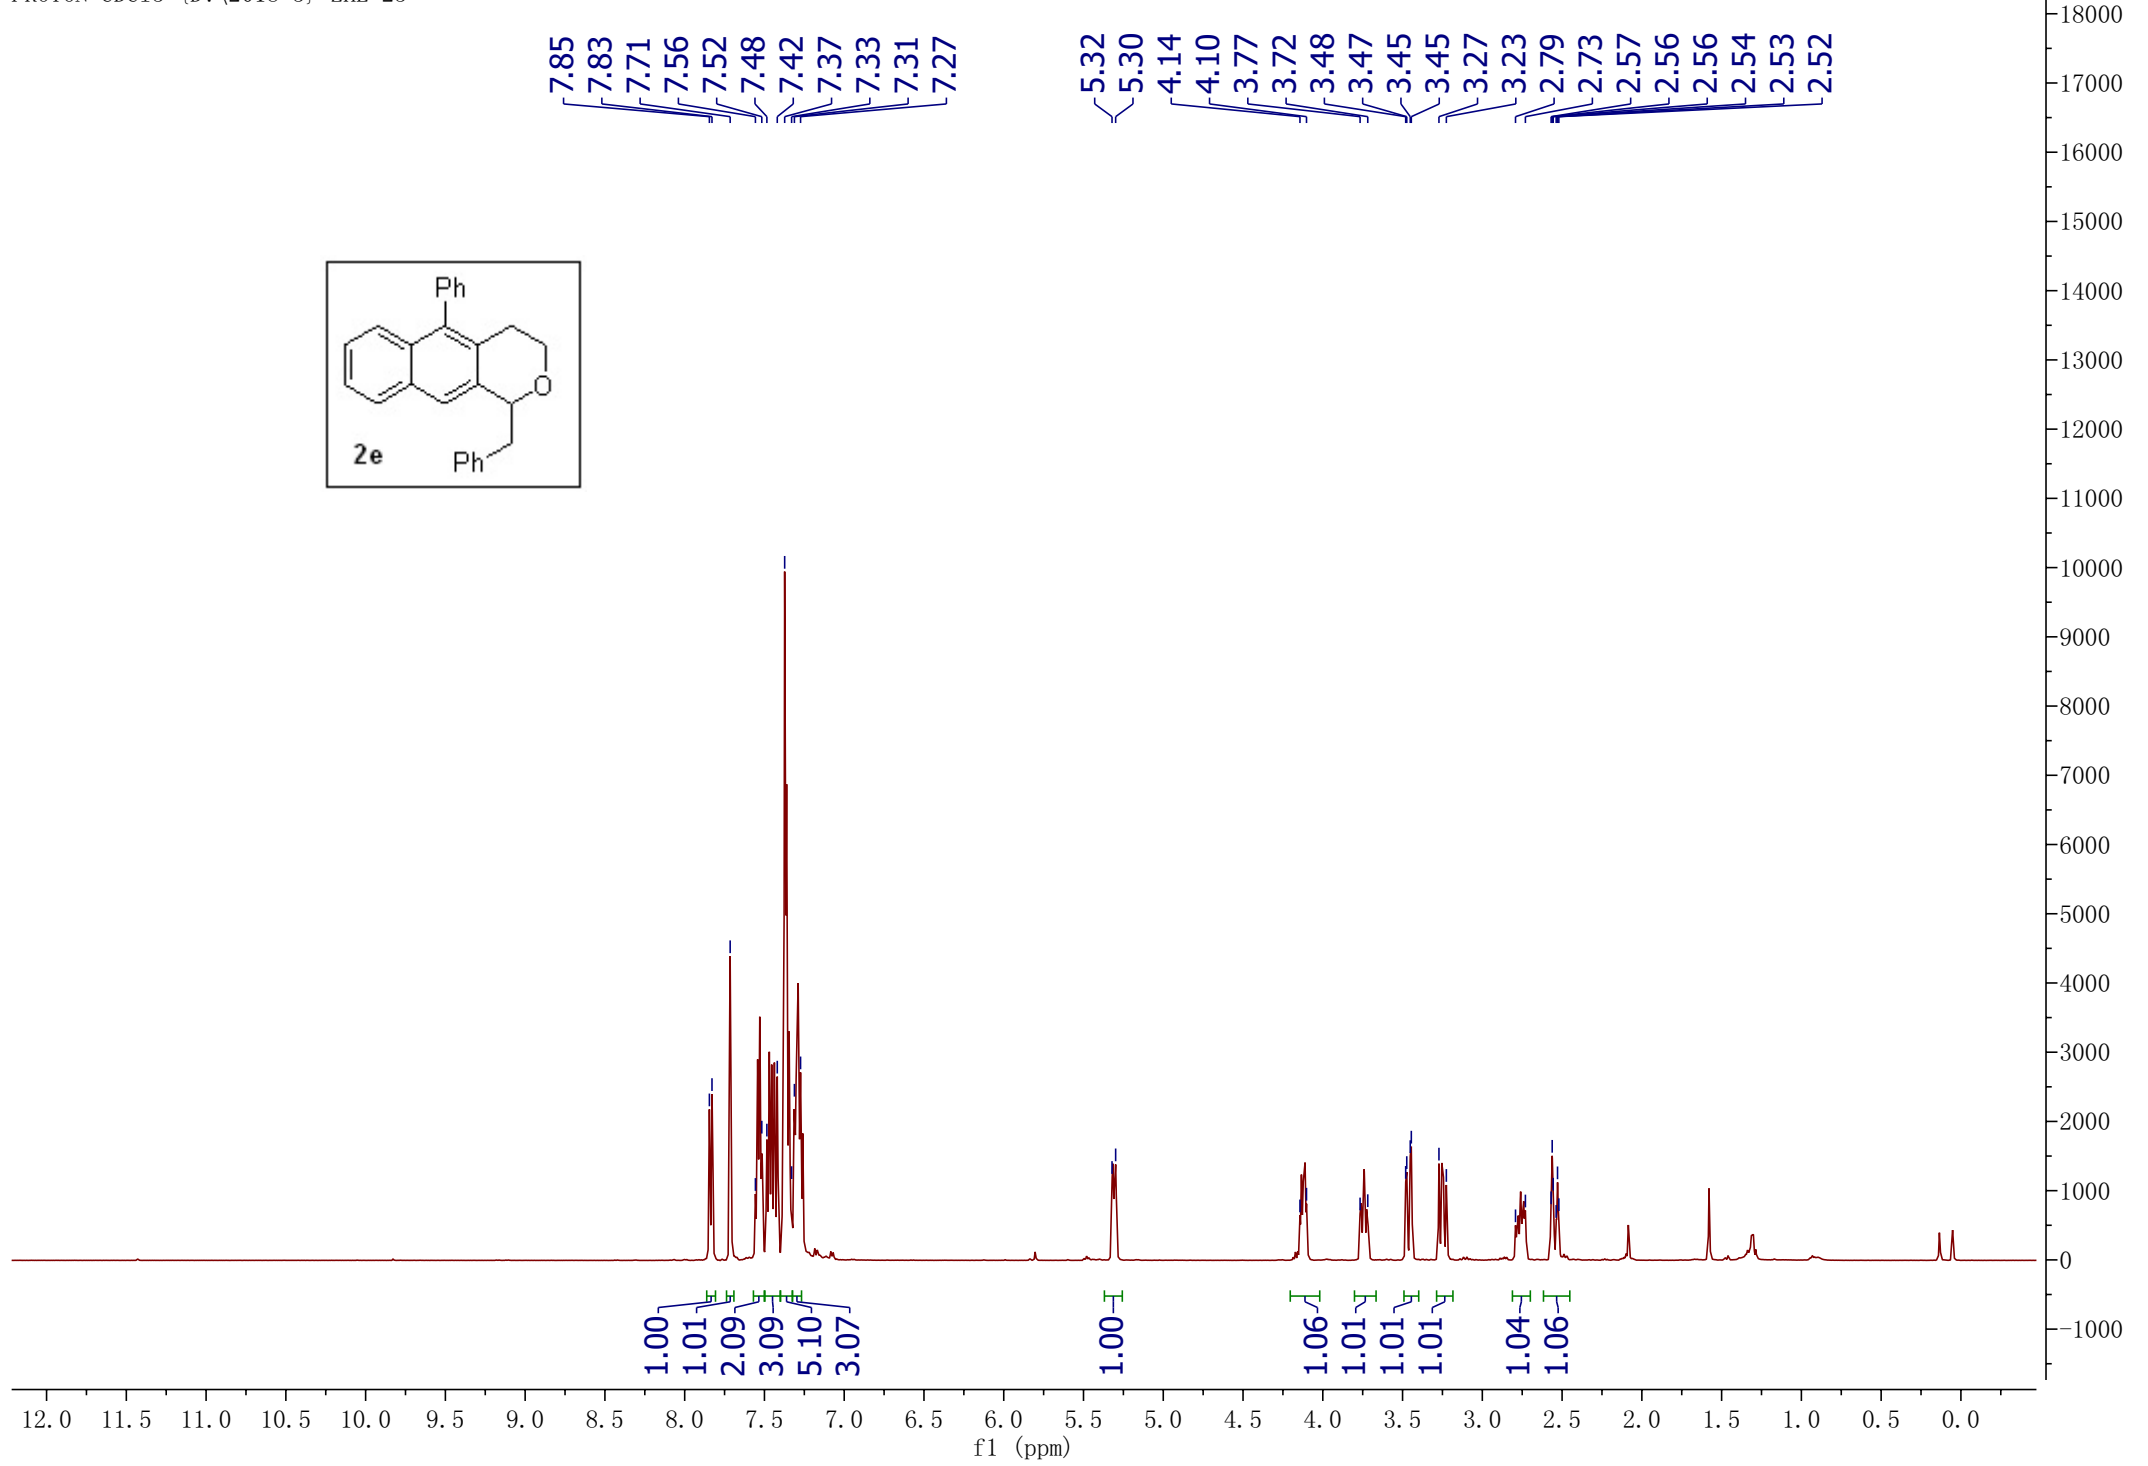

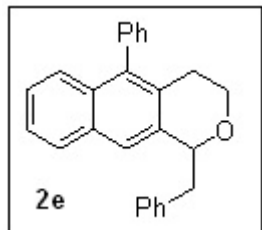

139.04  
138.95  
138.46  
136.28  
131.87  
131.59  
130.67  
130.25  
130.20  
129.69  
128.72  
128.59  
128.37  
127.75  
127.36  
126.42  
126.11  
125.74  
125.44  
123.64  
77.41 CDC13  
77.37  
77.16 CDC13  
76.91 CDC13  
63.38  
43.44  
28.86

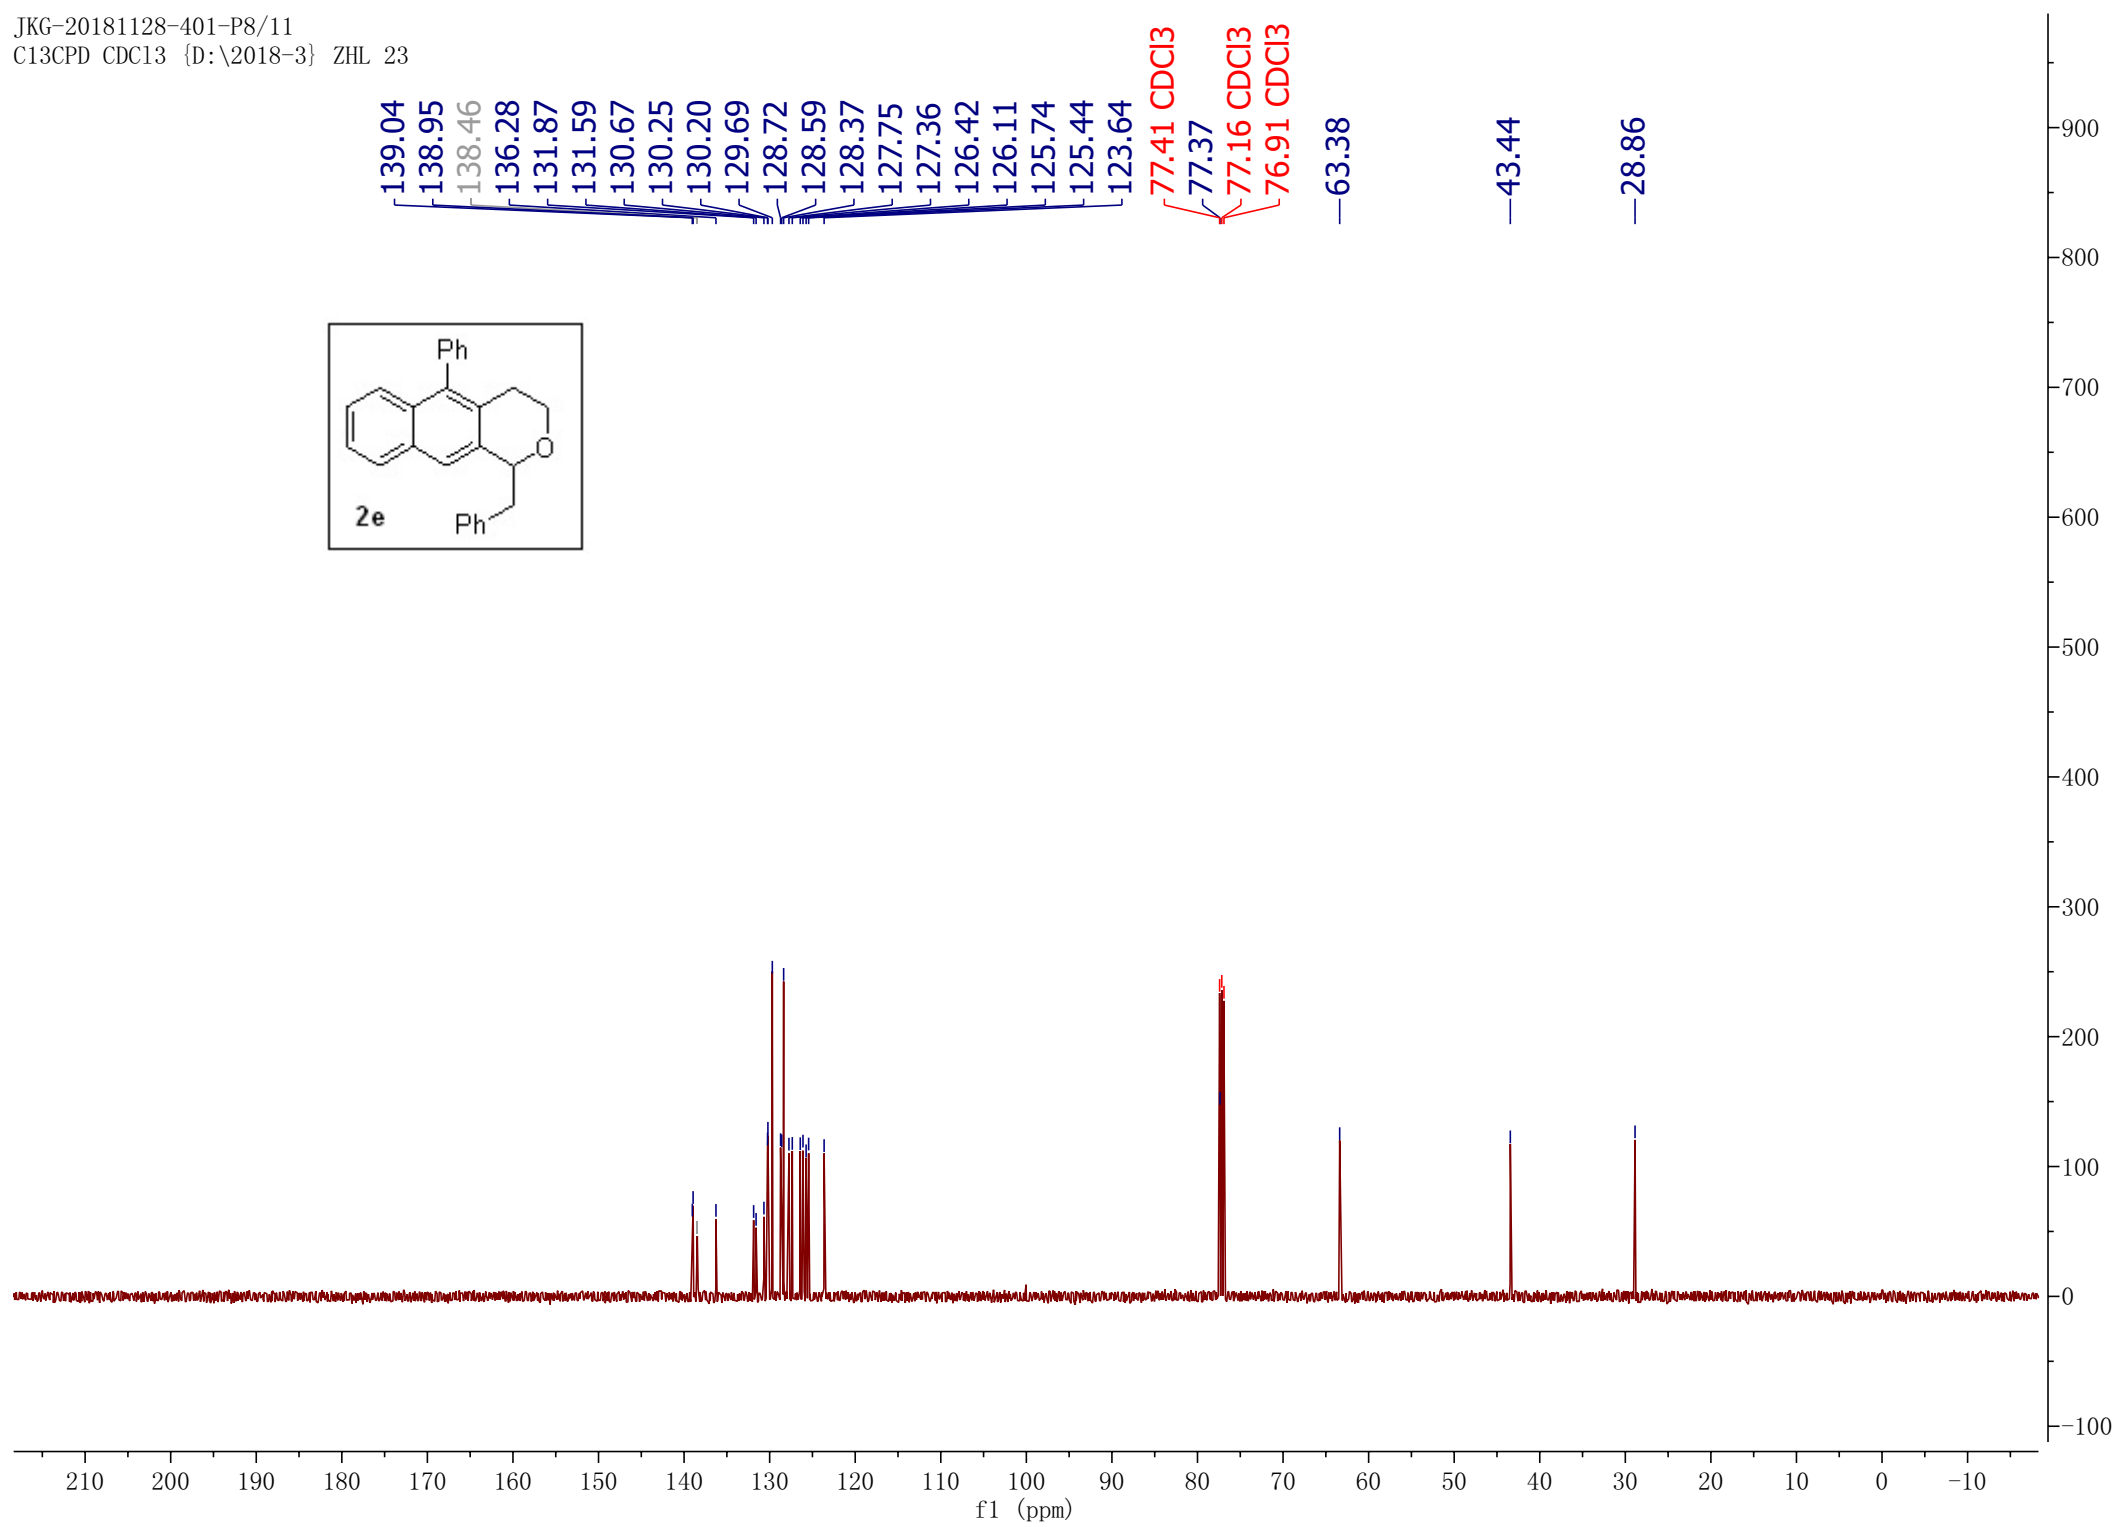

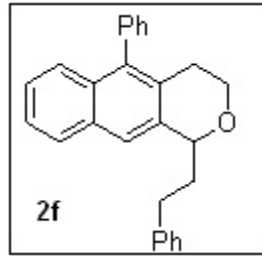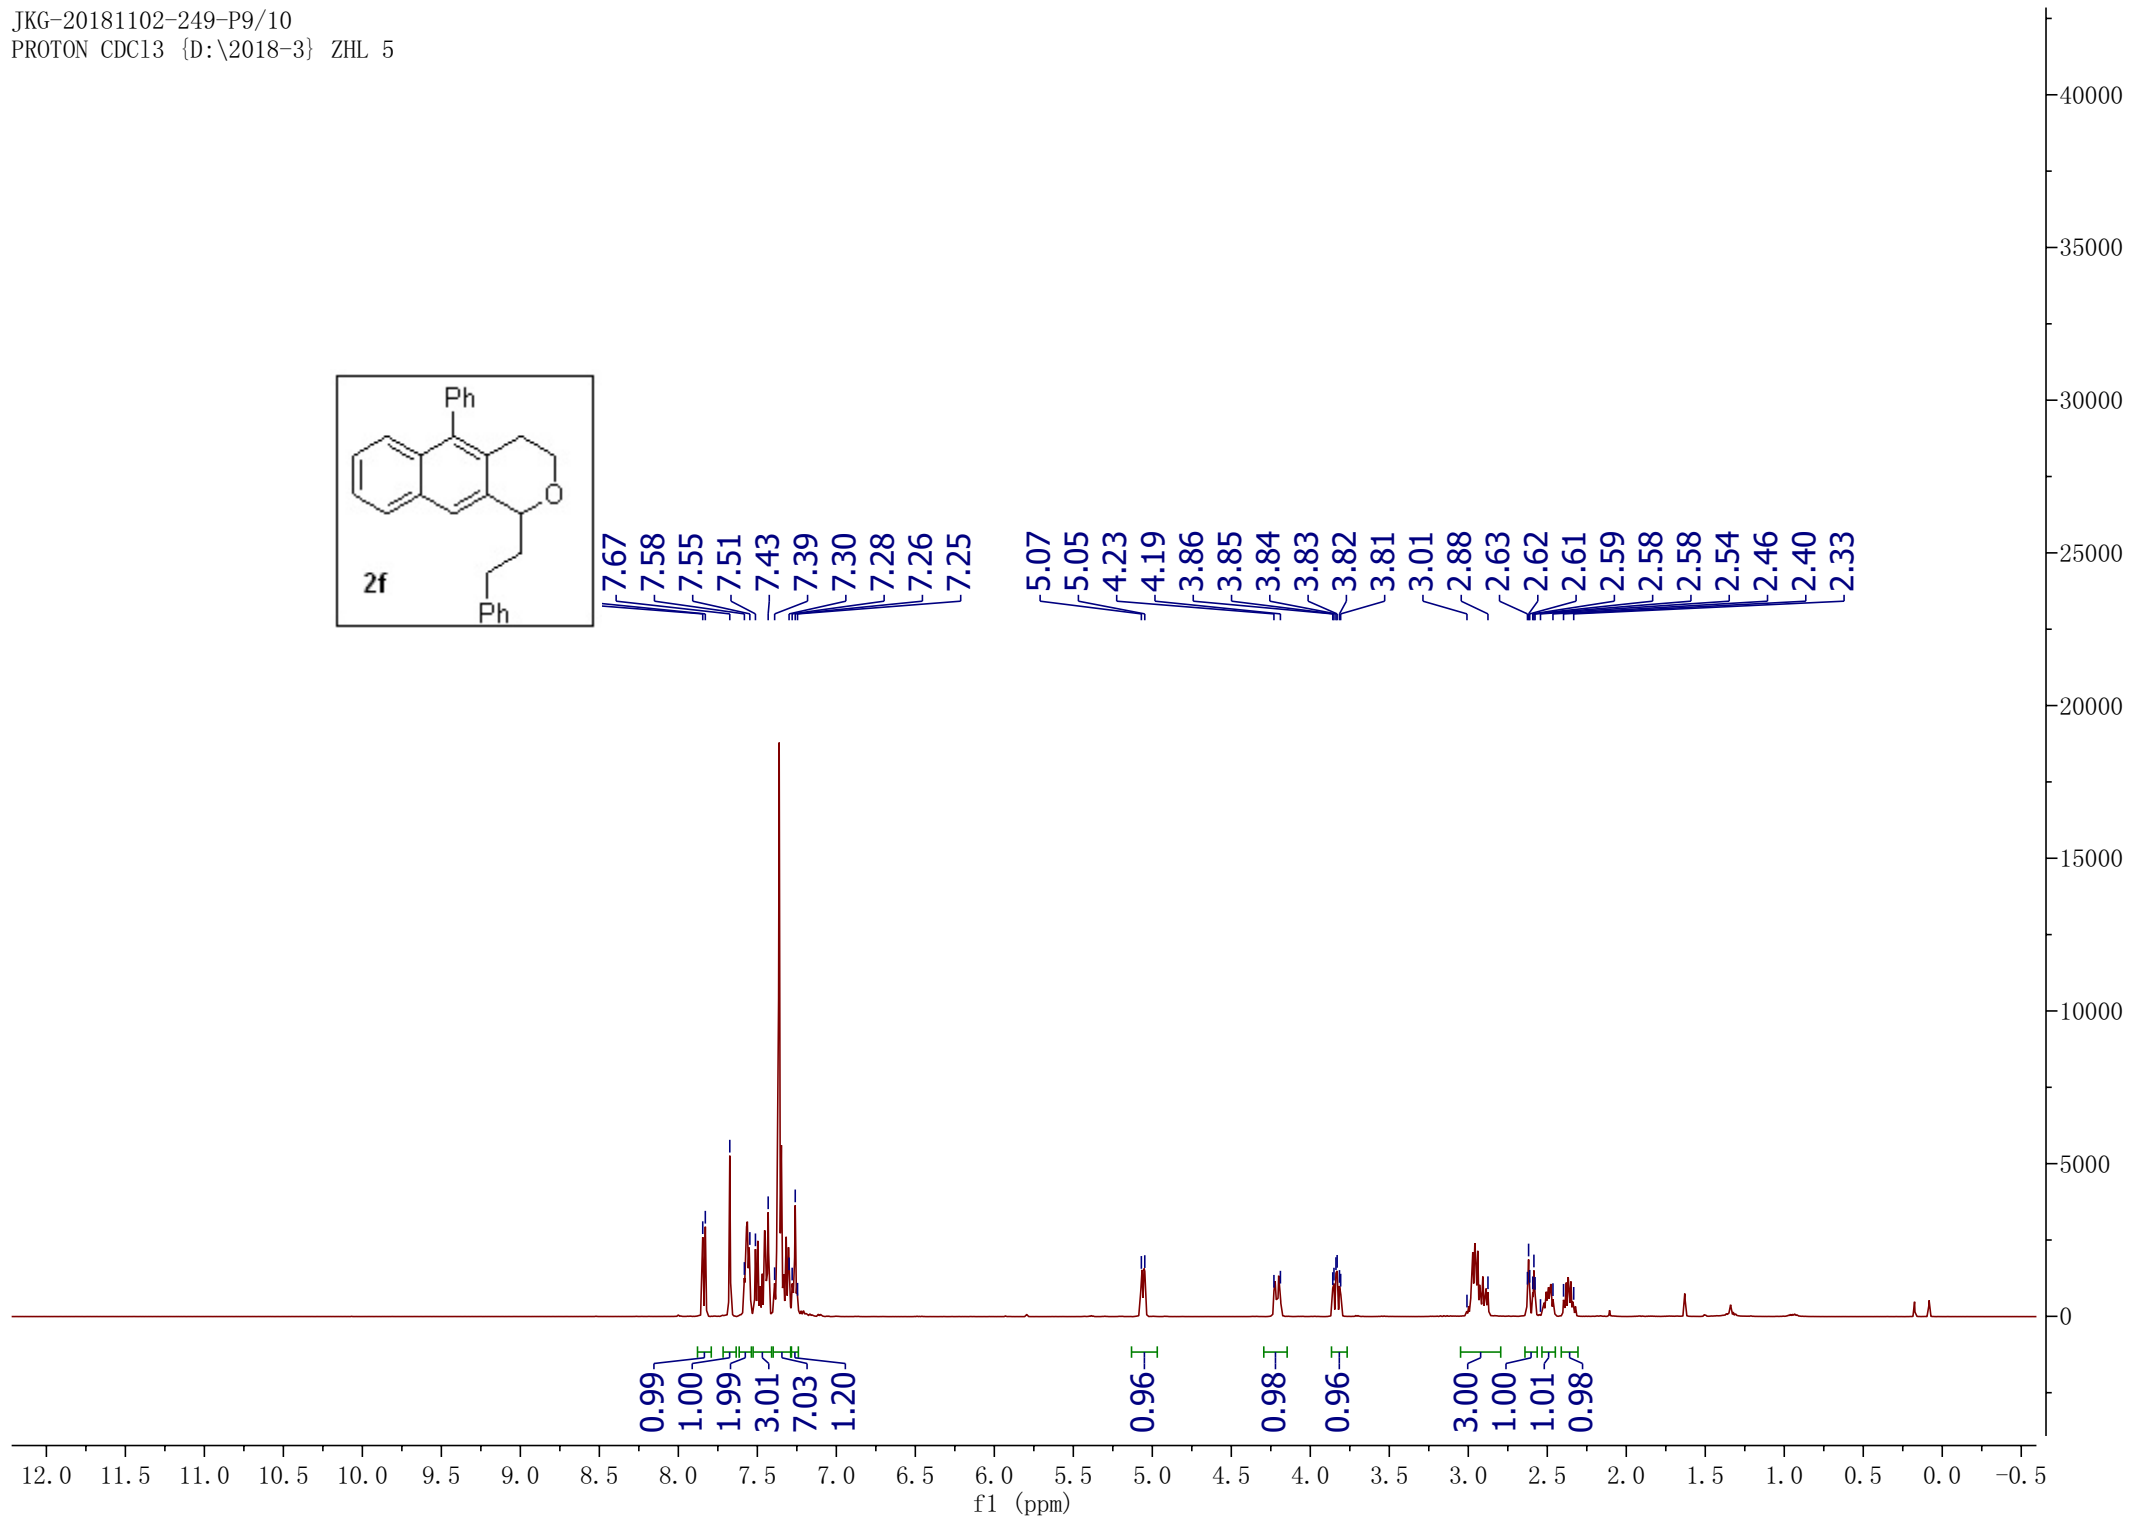

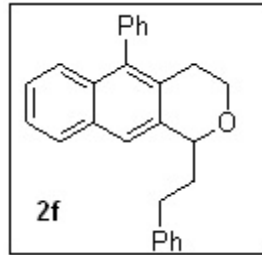

142.47  
139.11  
138.47  
136.68  
131.99  
131.55  
130.45  
130.22  
130.19  
128.74  
128.71  
128.60  
128.51  
127.70  
127.34  
126.07  
125.90  
125.64  
125.40  
123.13

77.41 CDC13  
77.16 CDC13  
76.91 CDC13  
75.80

63.73

38.39  
31.72  
28.93

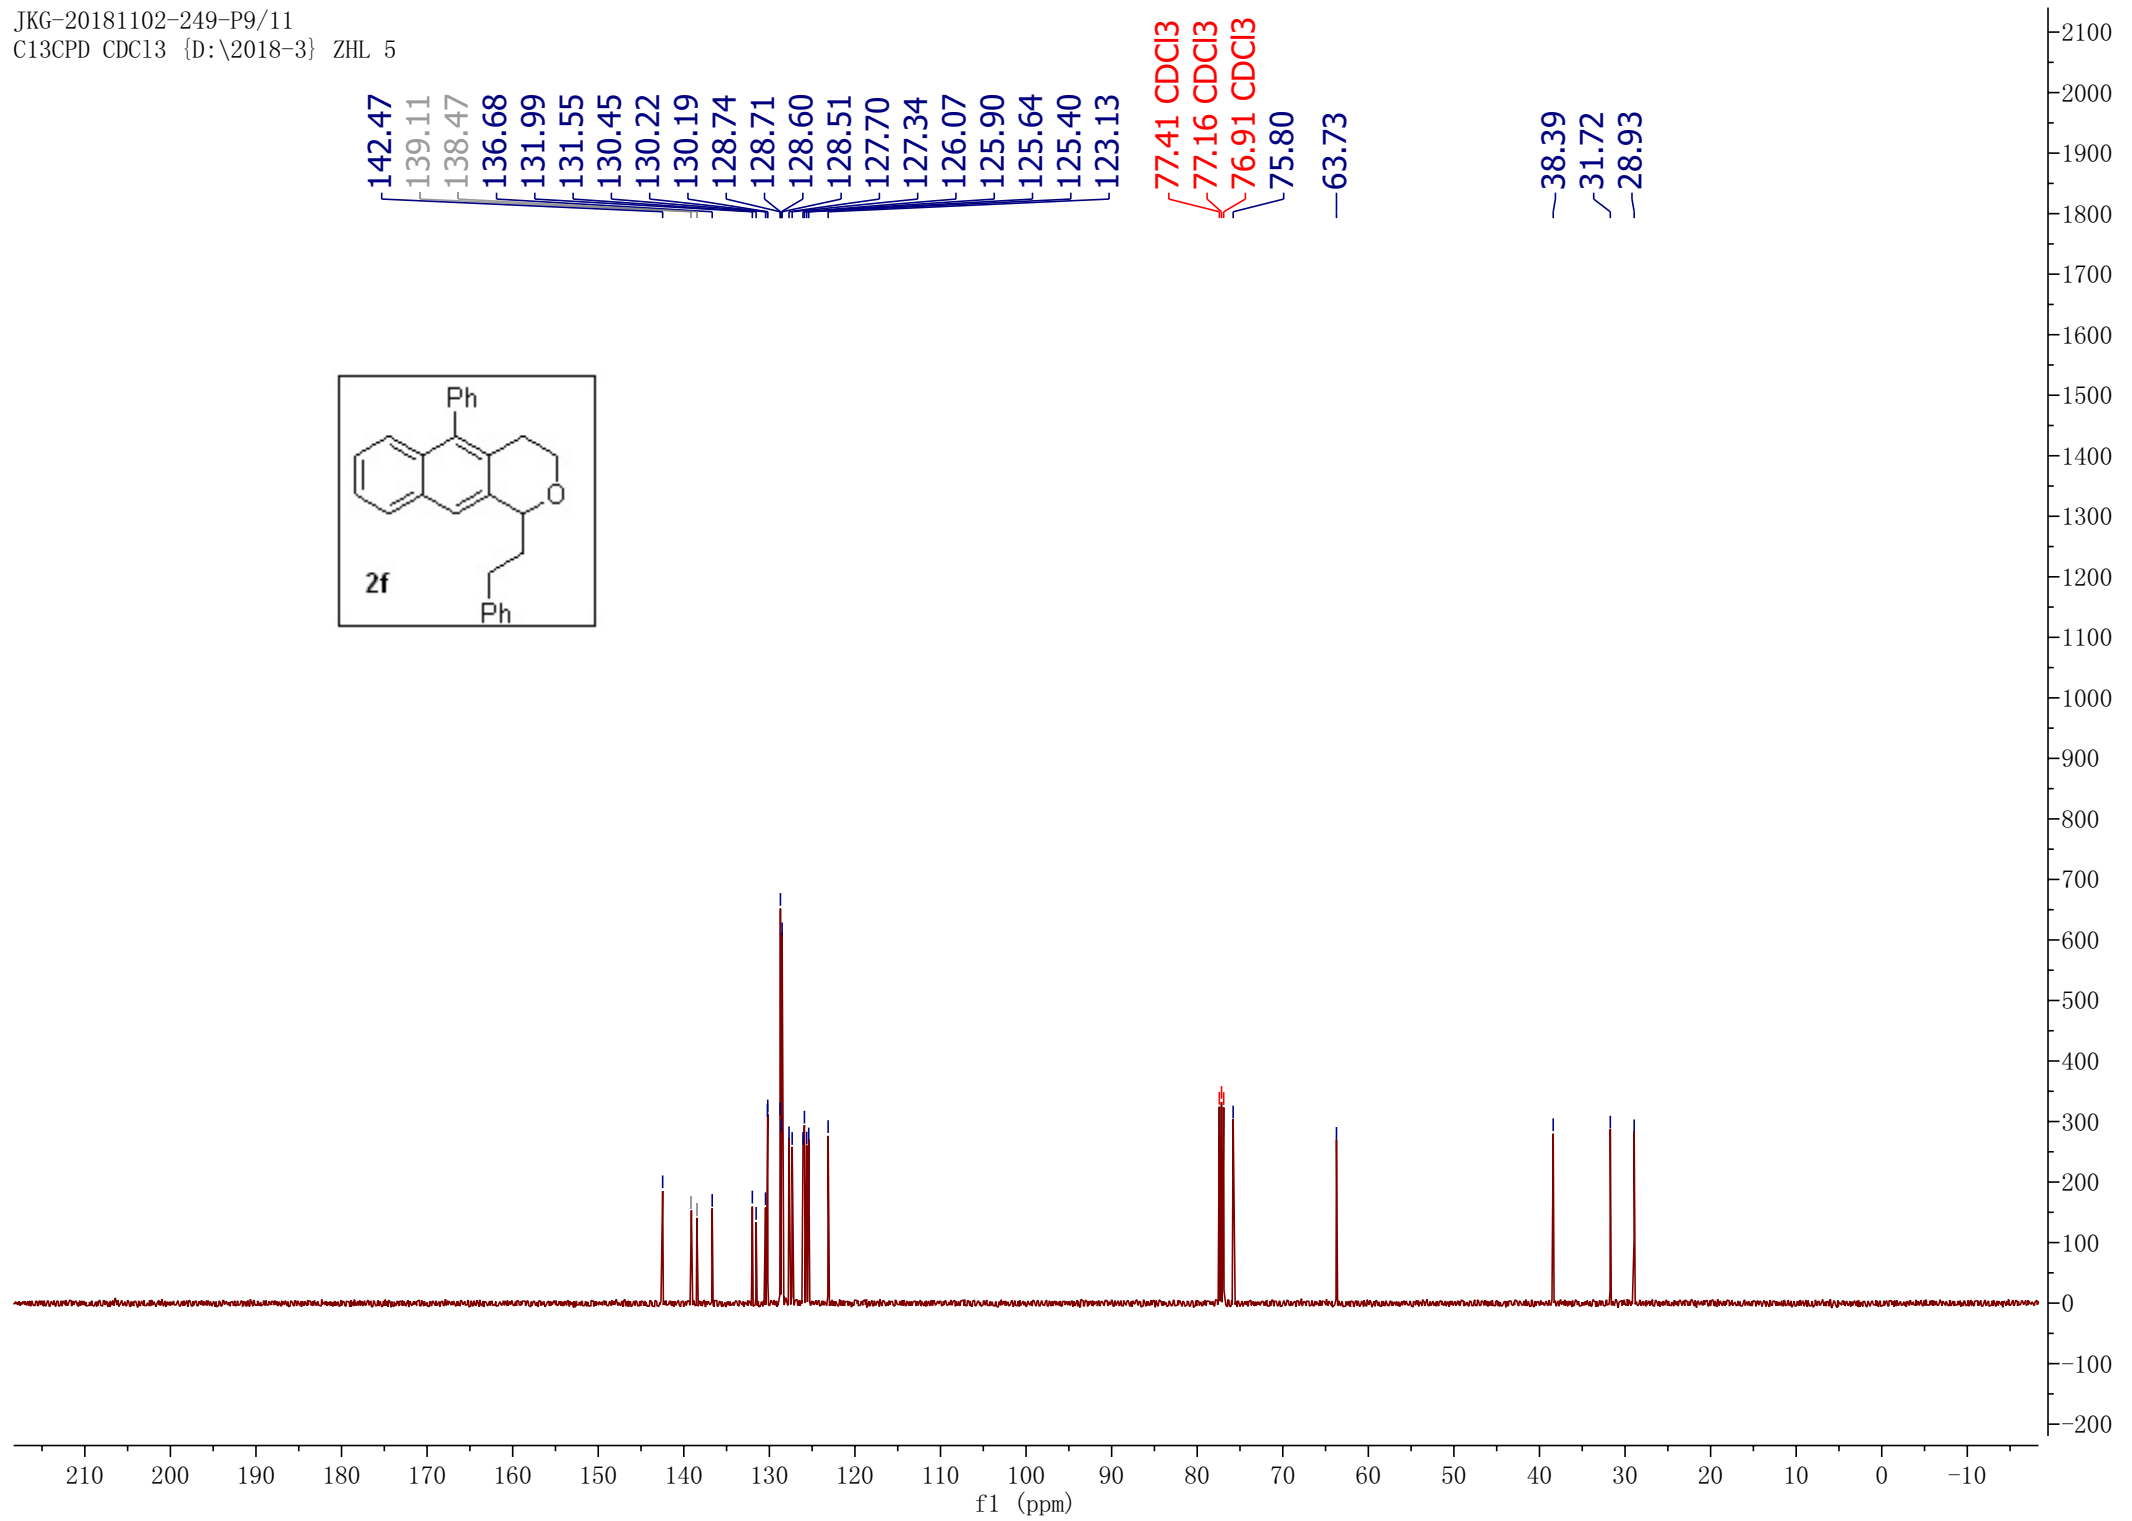

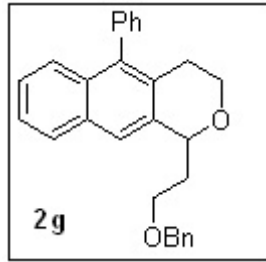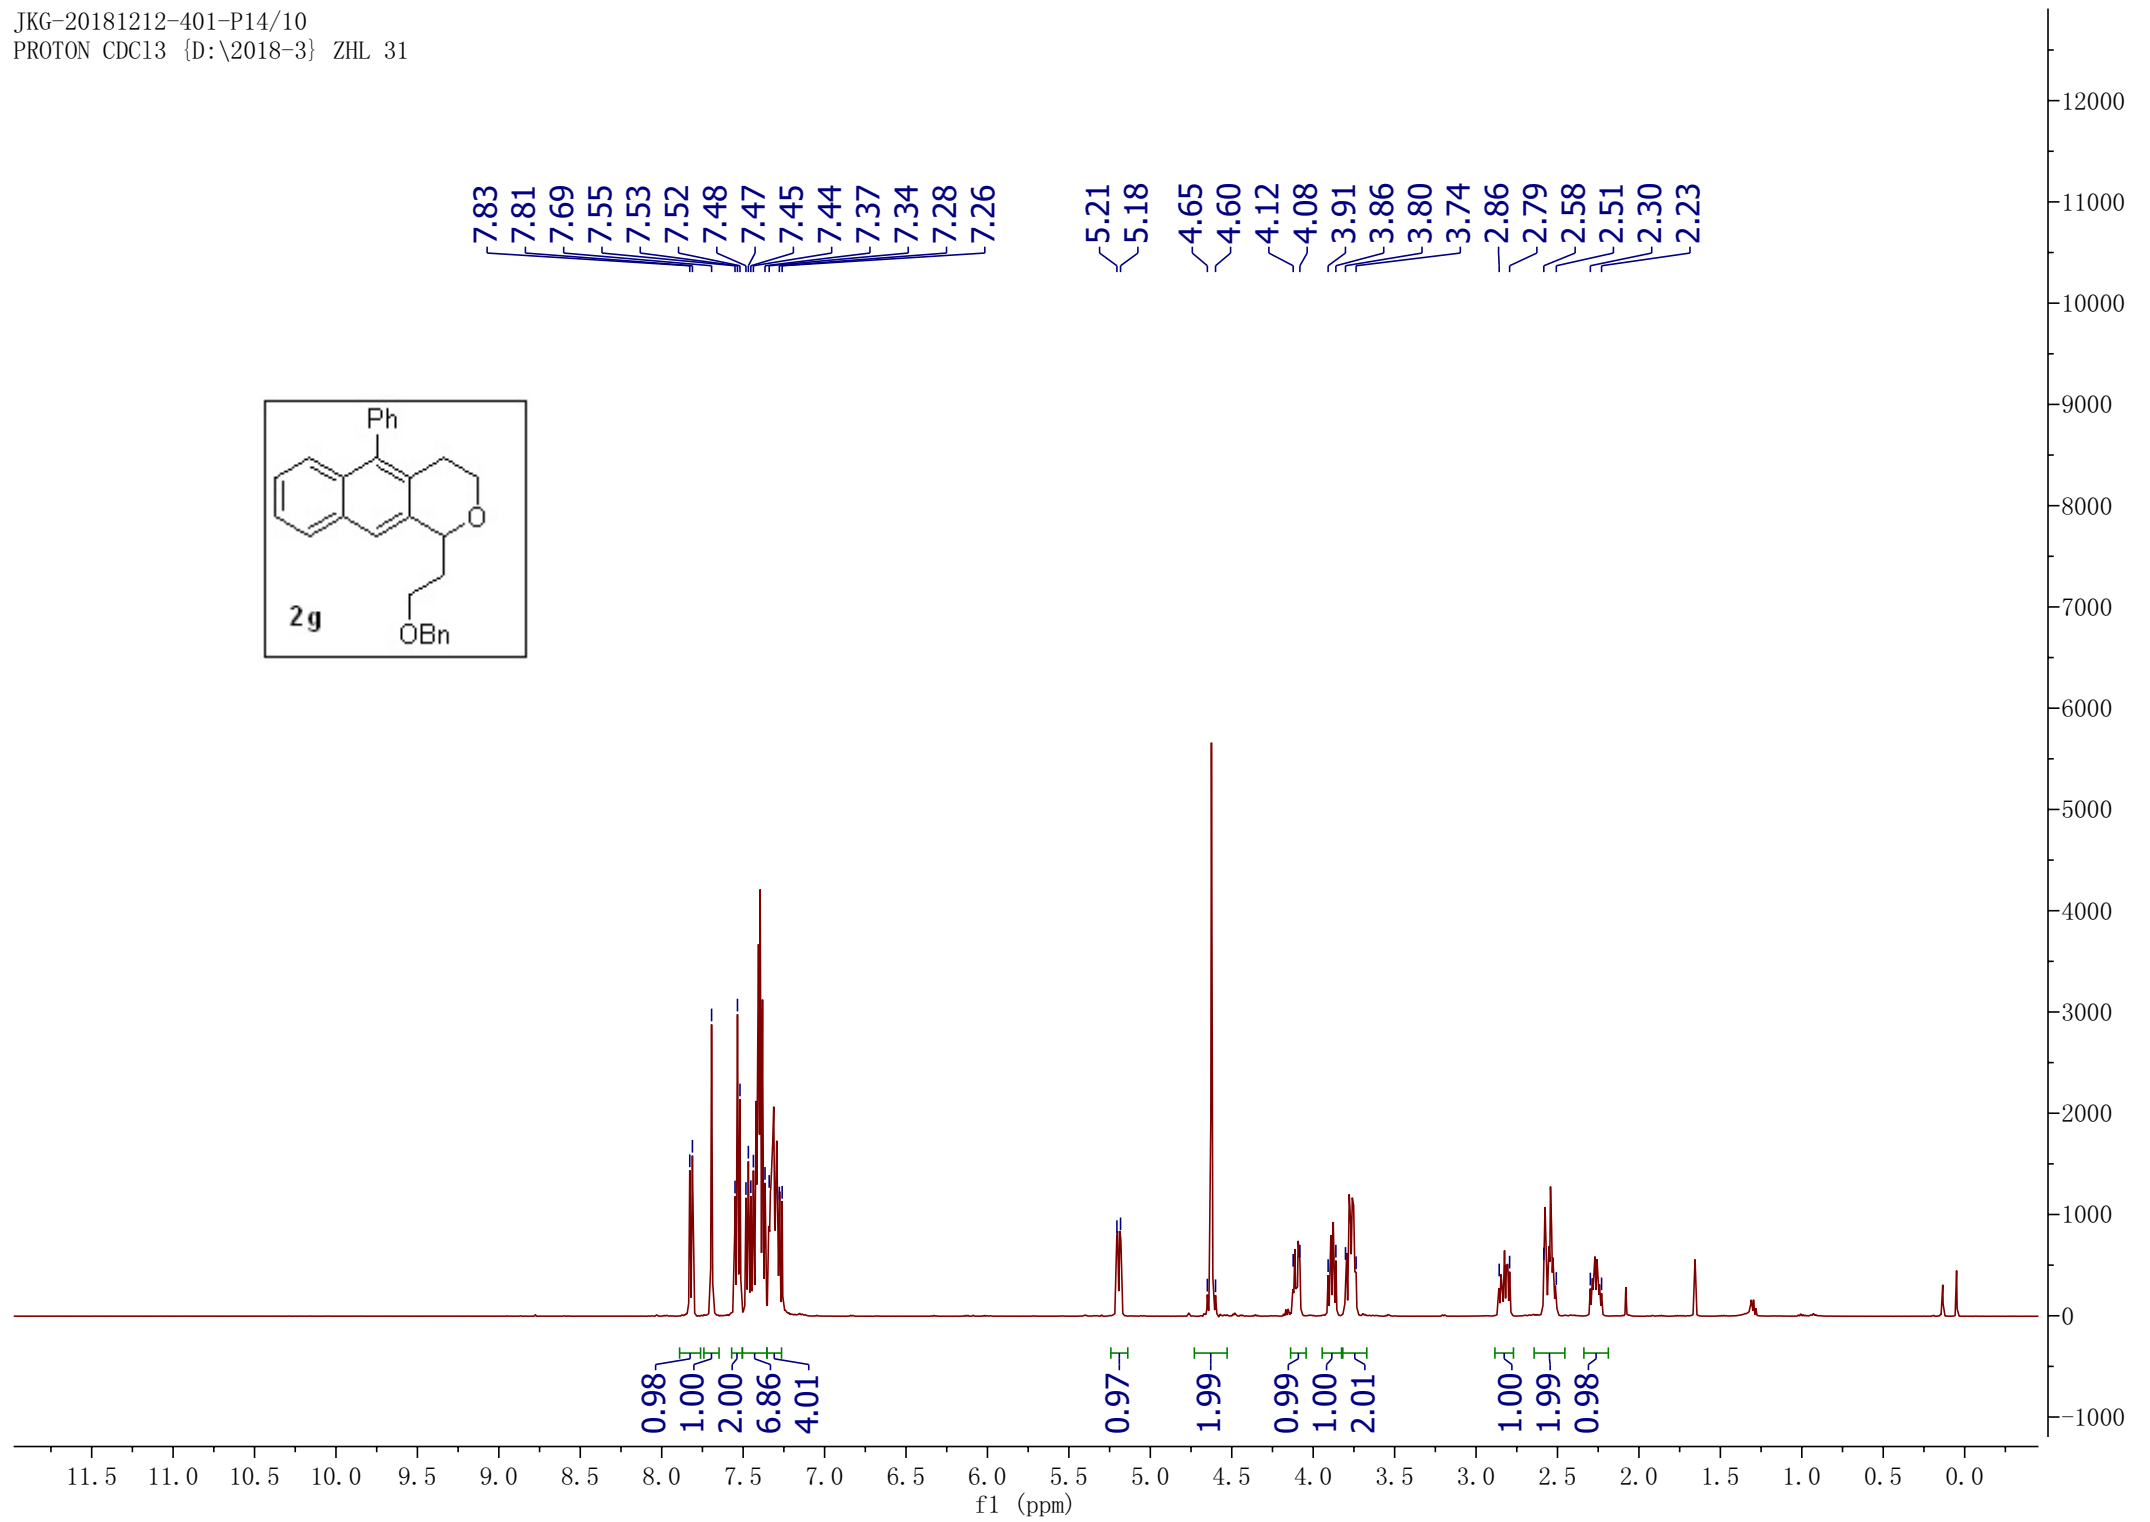

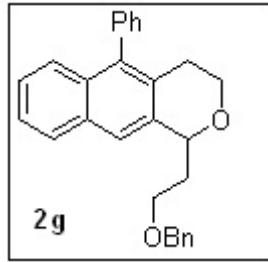

139.10  
138.76  
138.44  
136.61  
131.97  
131.55  
130.29  
130.20  
128.72  
128.60  
128.49  
127.79  
127.76  
127.64  
127.33  
126.05  
125.67  
125.42  
123.27  
77.41 CDC13  
77.16 CDC13  
76.91 CDC13  
73.82  
73.32  
67.20  
63.63  
36.89  
28.85

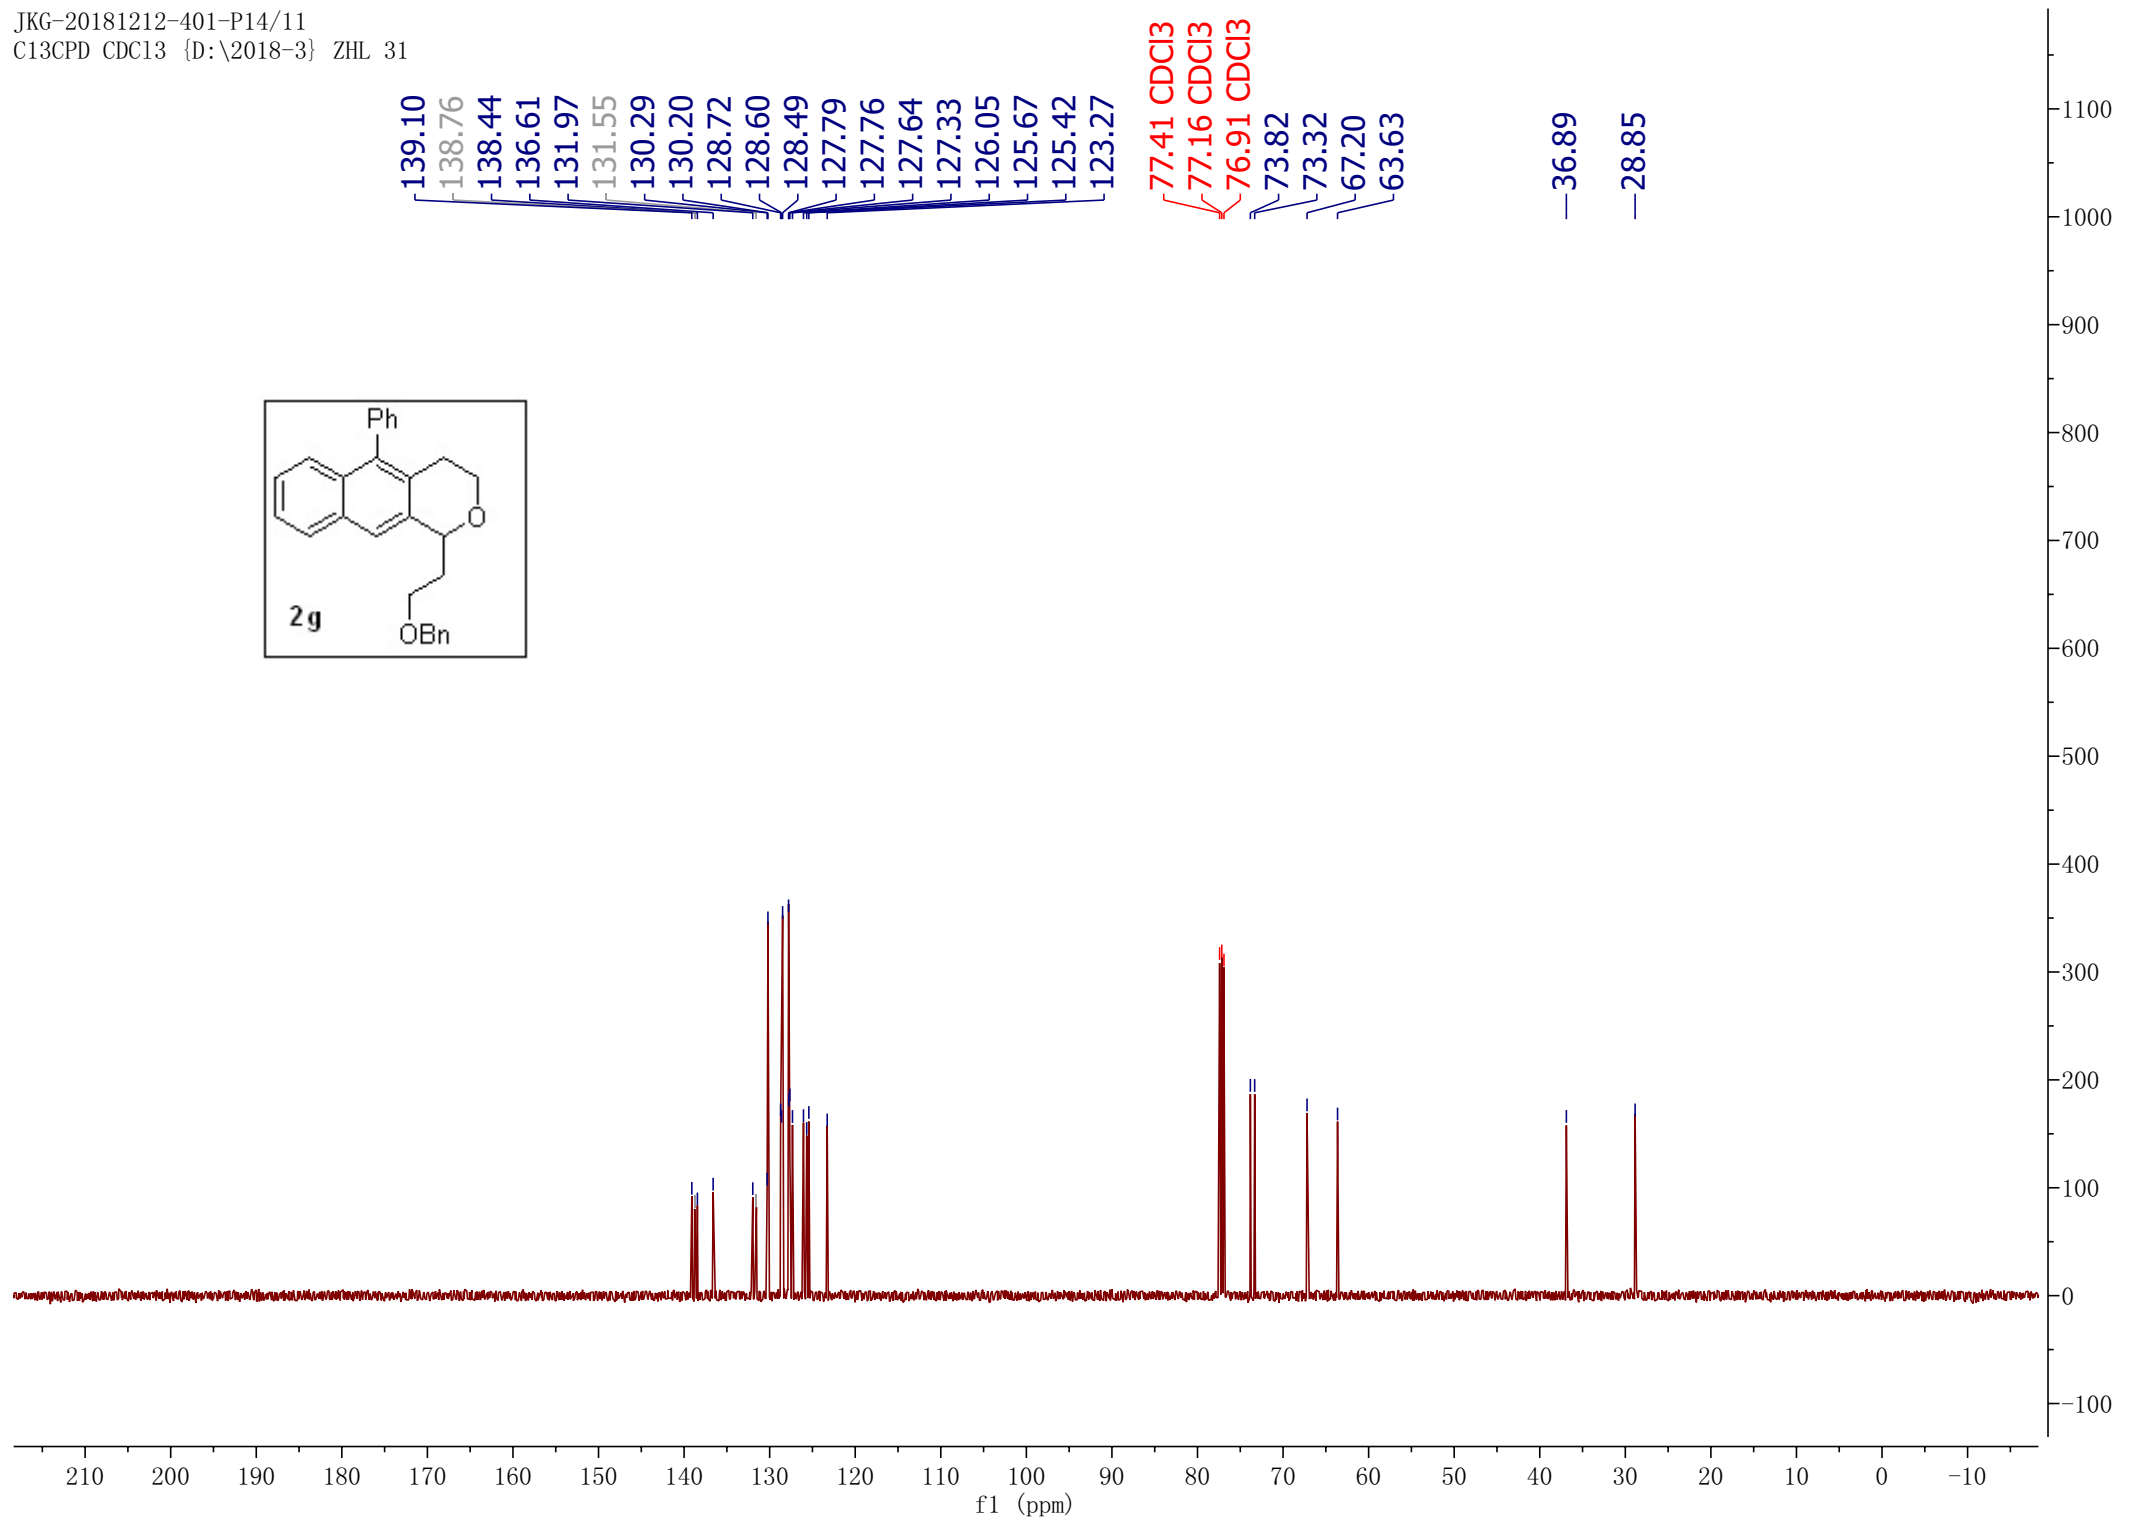





139.16  
138.44  
136.97  
135.80  
135.75  
134.30  
134.11  
131.97  
131.55  
130.32  
130.21  
130.20  
129.72  
129.70  
128.72  
128.62  
127.80  
127.77  
127.75  
127.32  
126.07  
125.62  
125.39  
123.18  
77.41 CDC13  
77.16 CDC13  
76.91 CDC13  
73.33  
63.42  
60.74

39.51

28.85  
27.09  
19.44

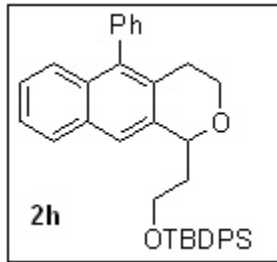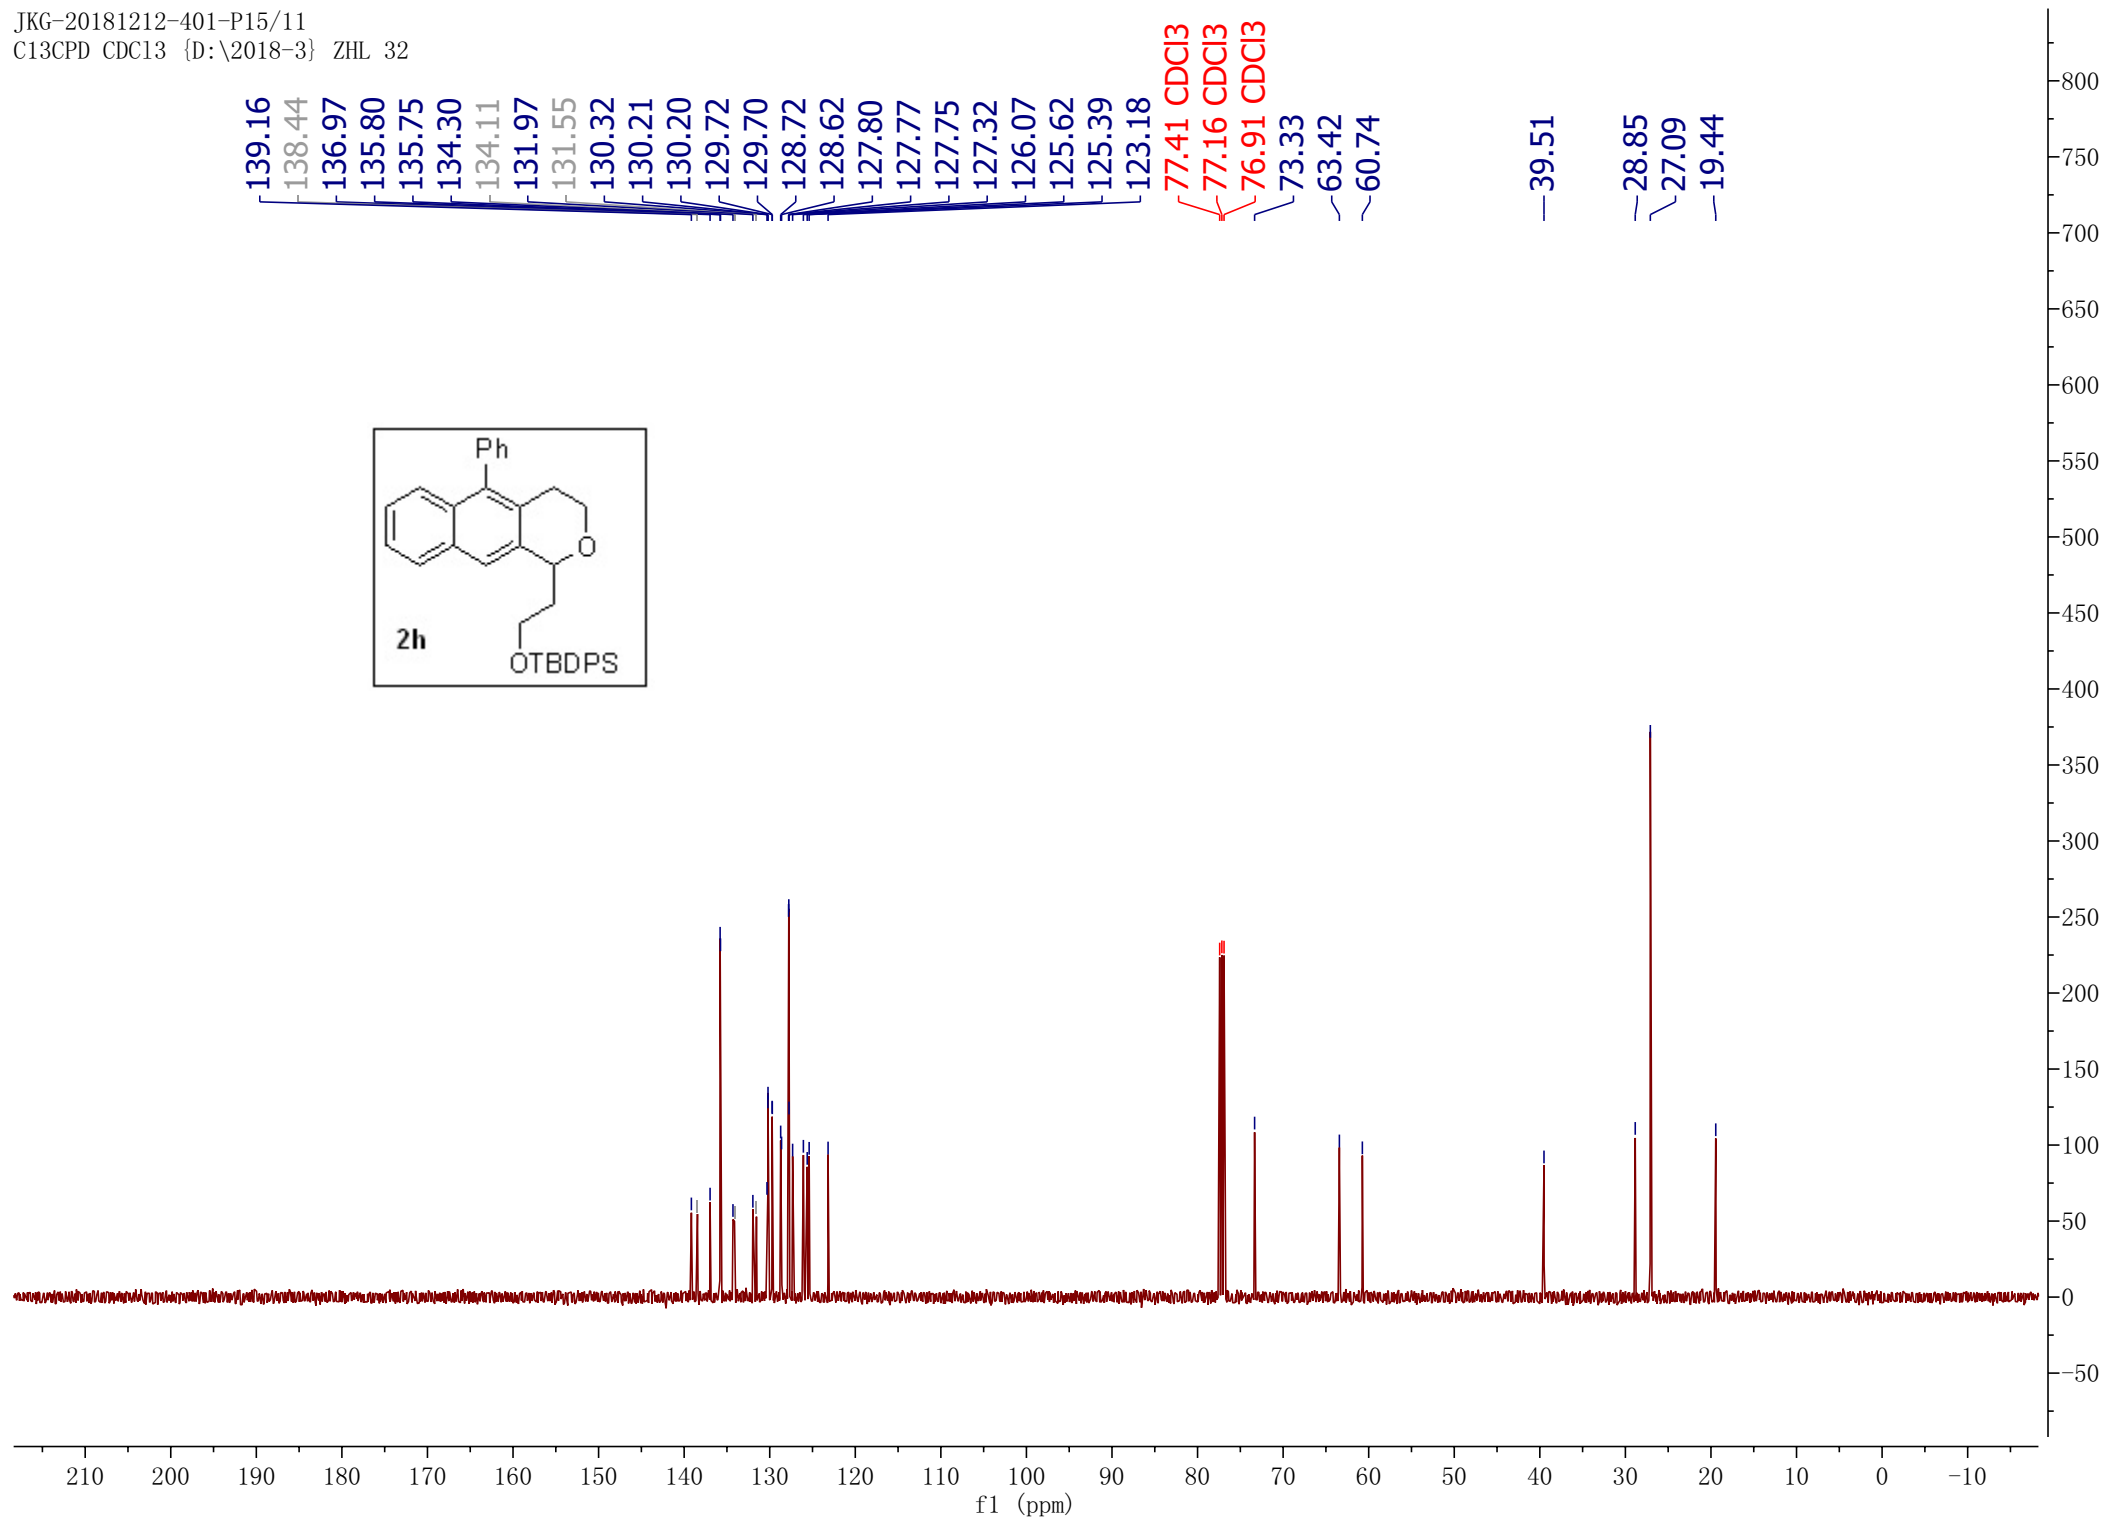

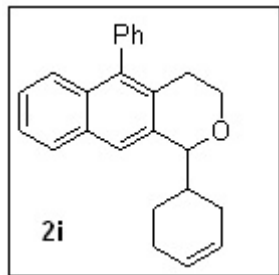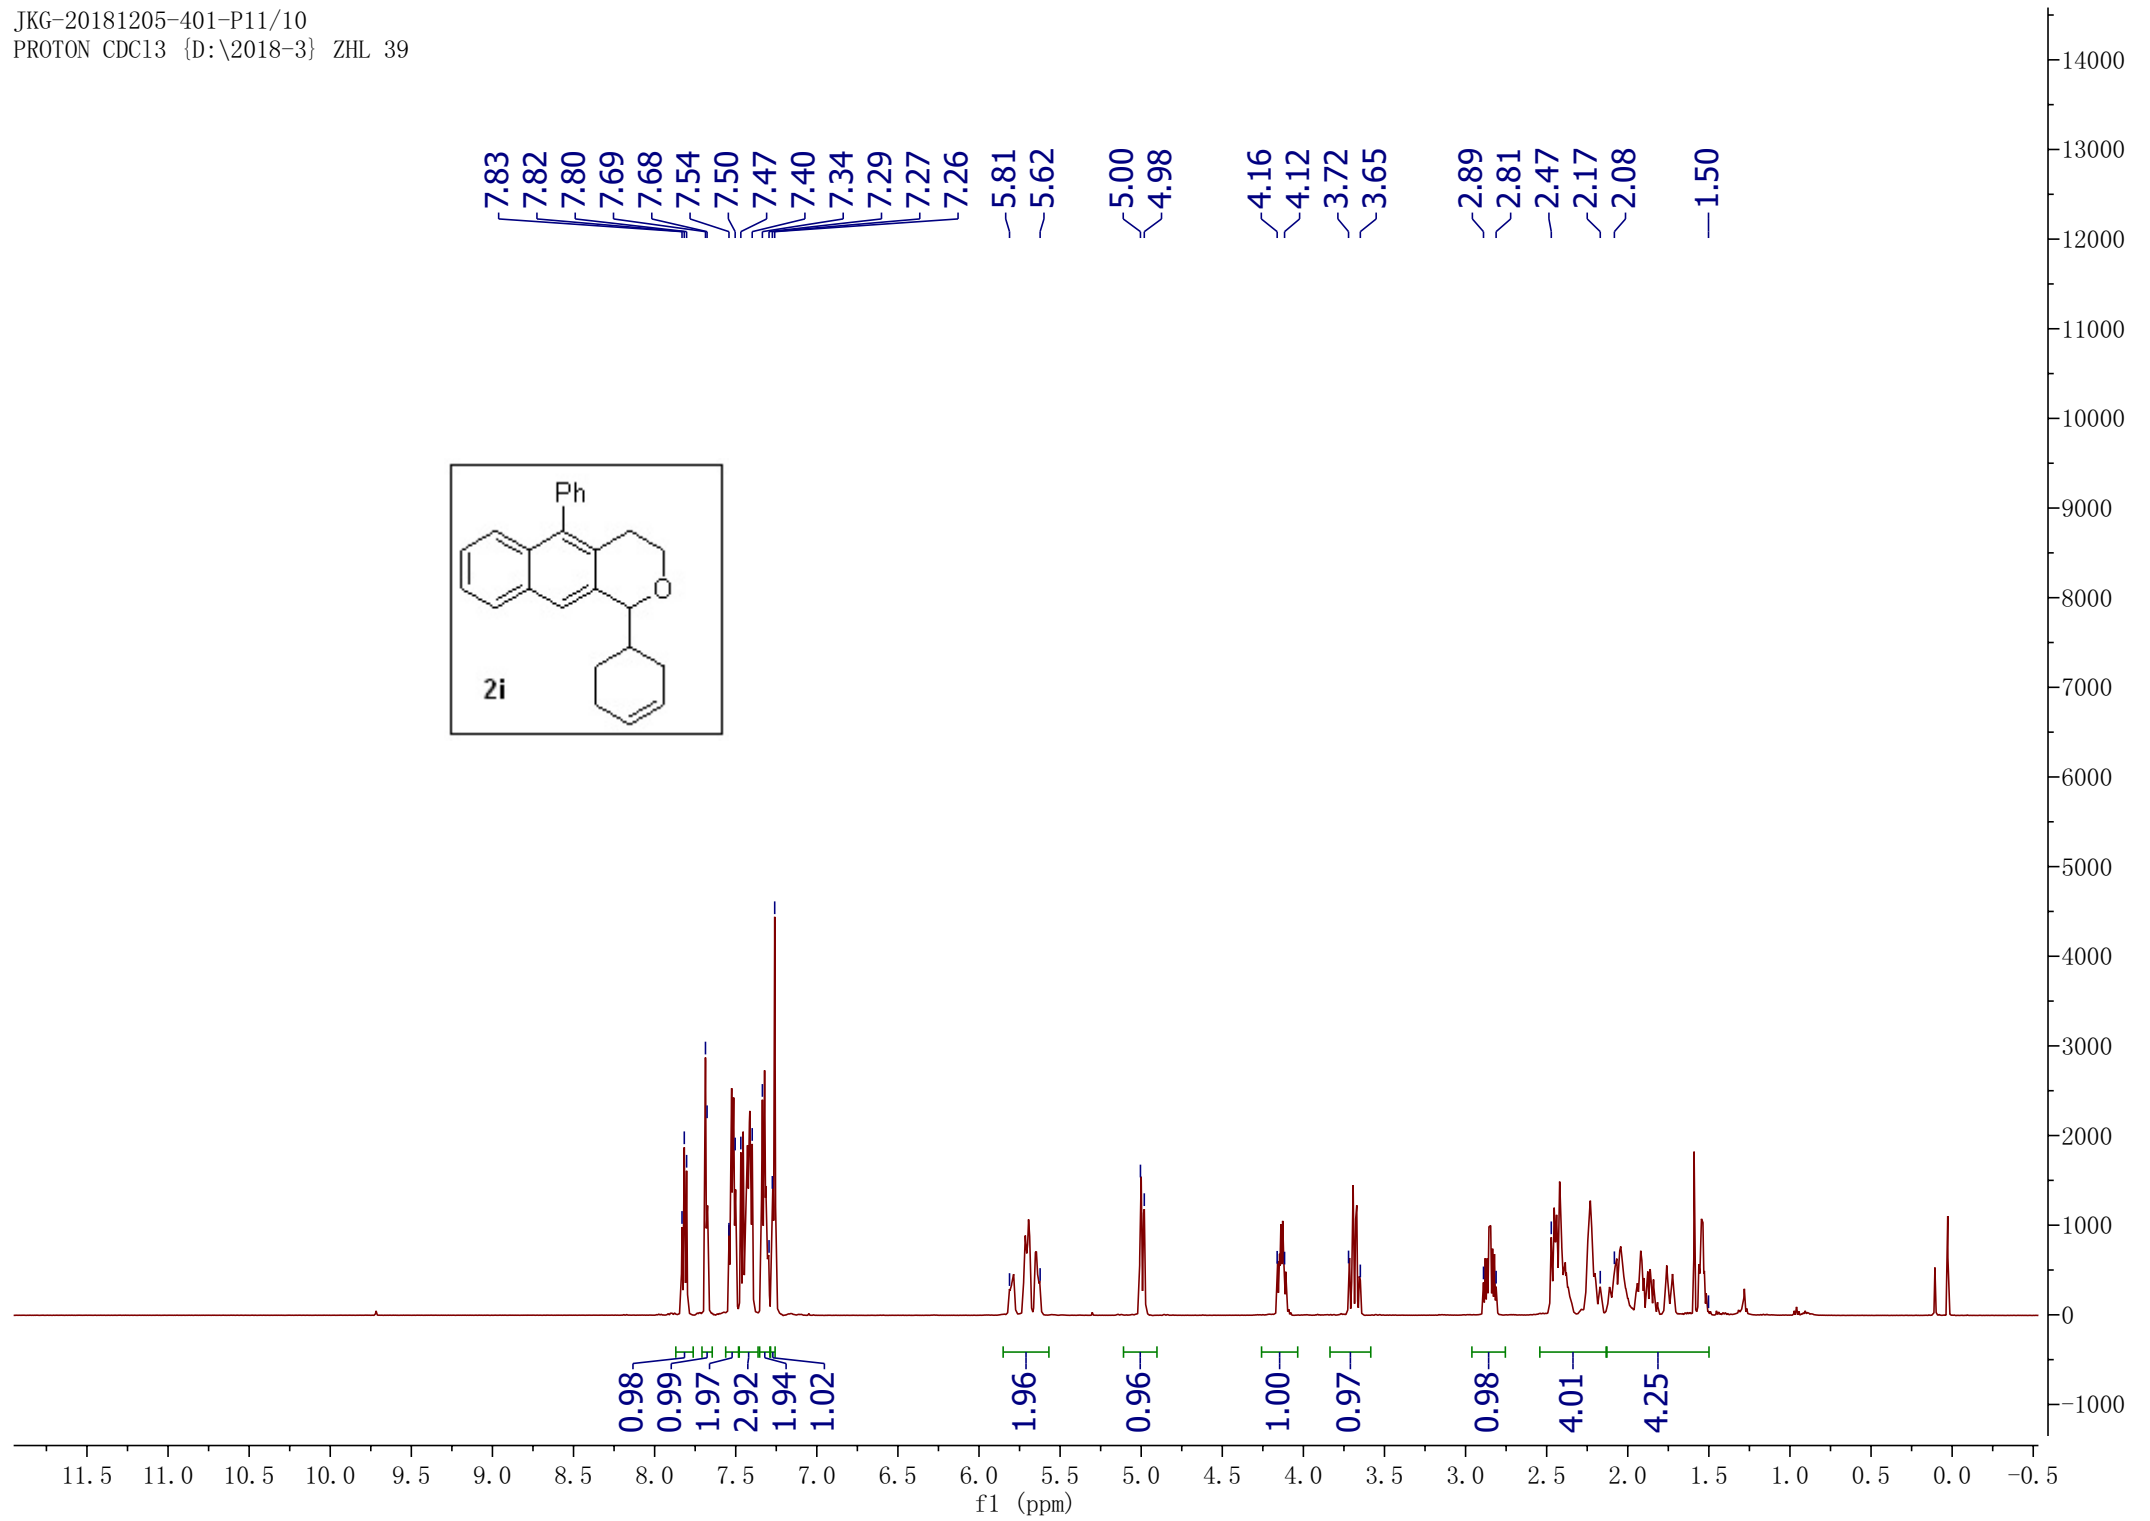

139.11  
138.25  
135.72  
132.05  
131.74  
131.38  
130.45  
130.24  
128.72  
128.53  
127.75  
127.34  
127.18  
126.68  
126.11  
125.60  
125.35  
123.40

80.41  
77.41 CDC13  
77.16 CDC13  
76.91 CDC13

64.48

40.24

29.10  
26.76  
26.30  
24.78

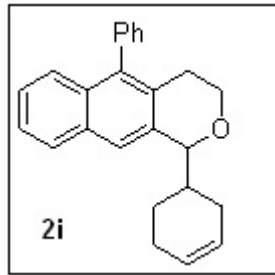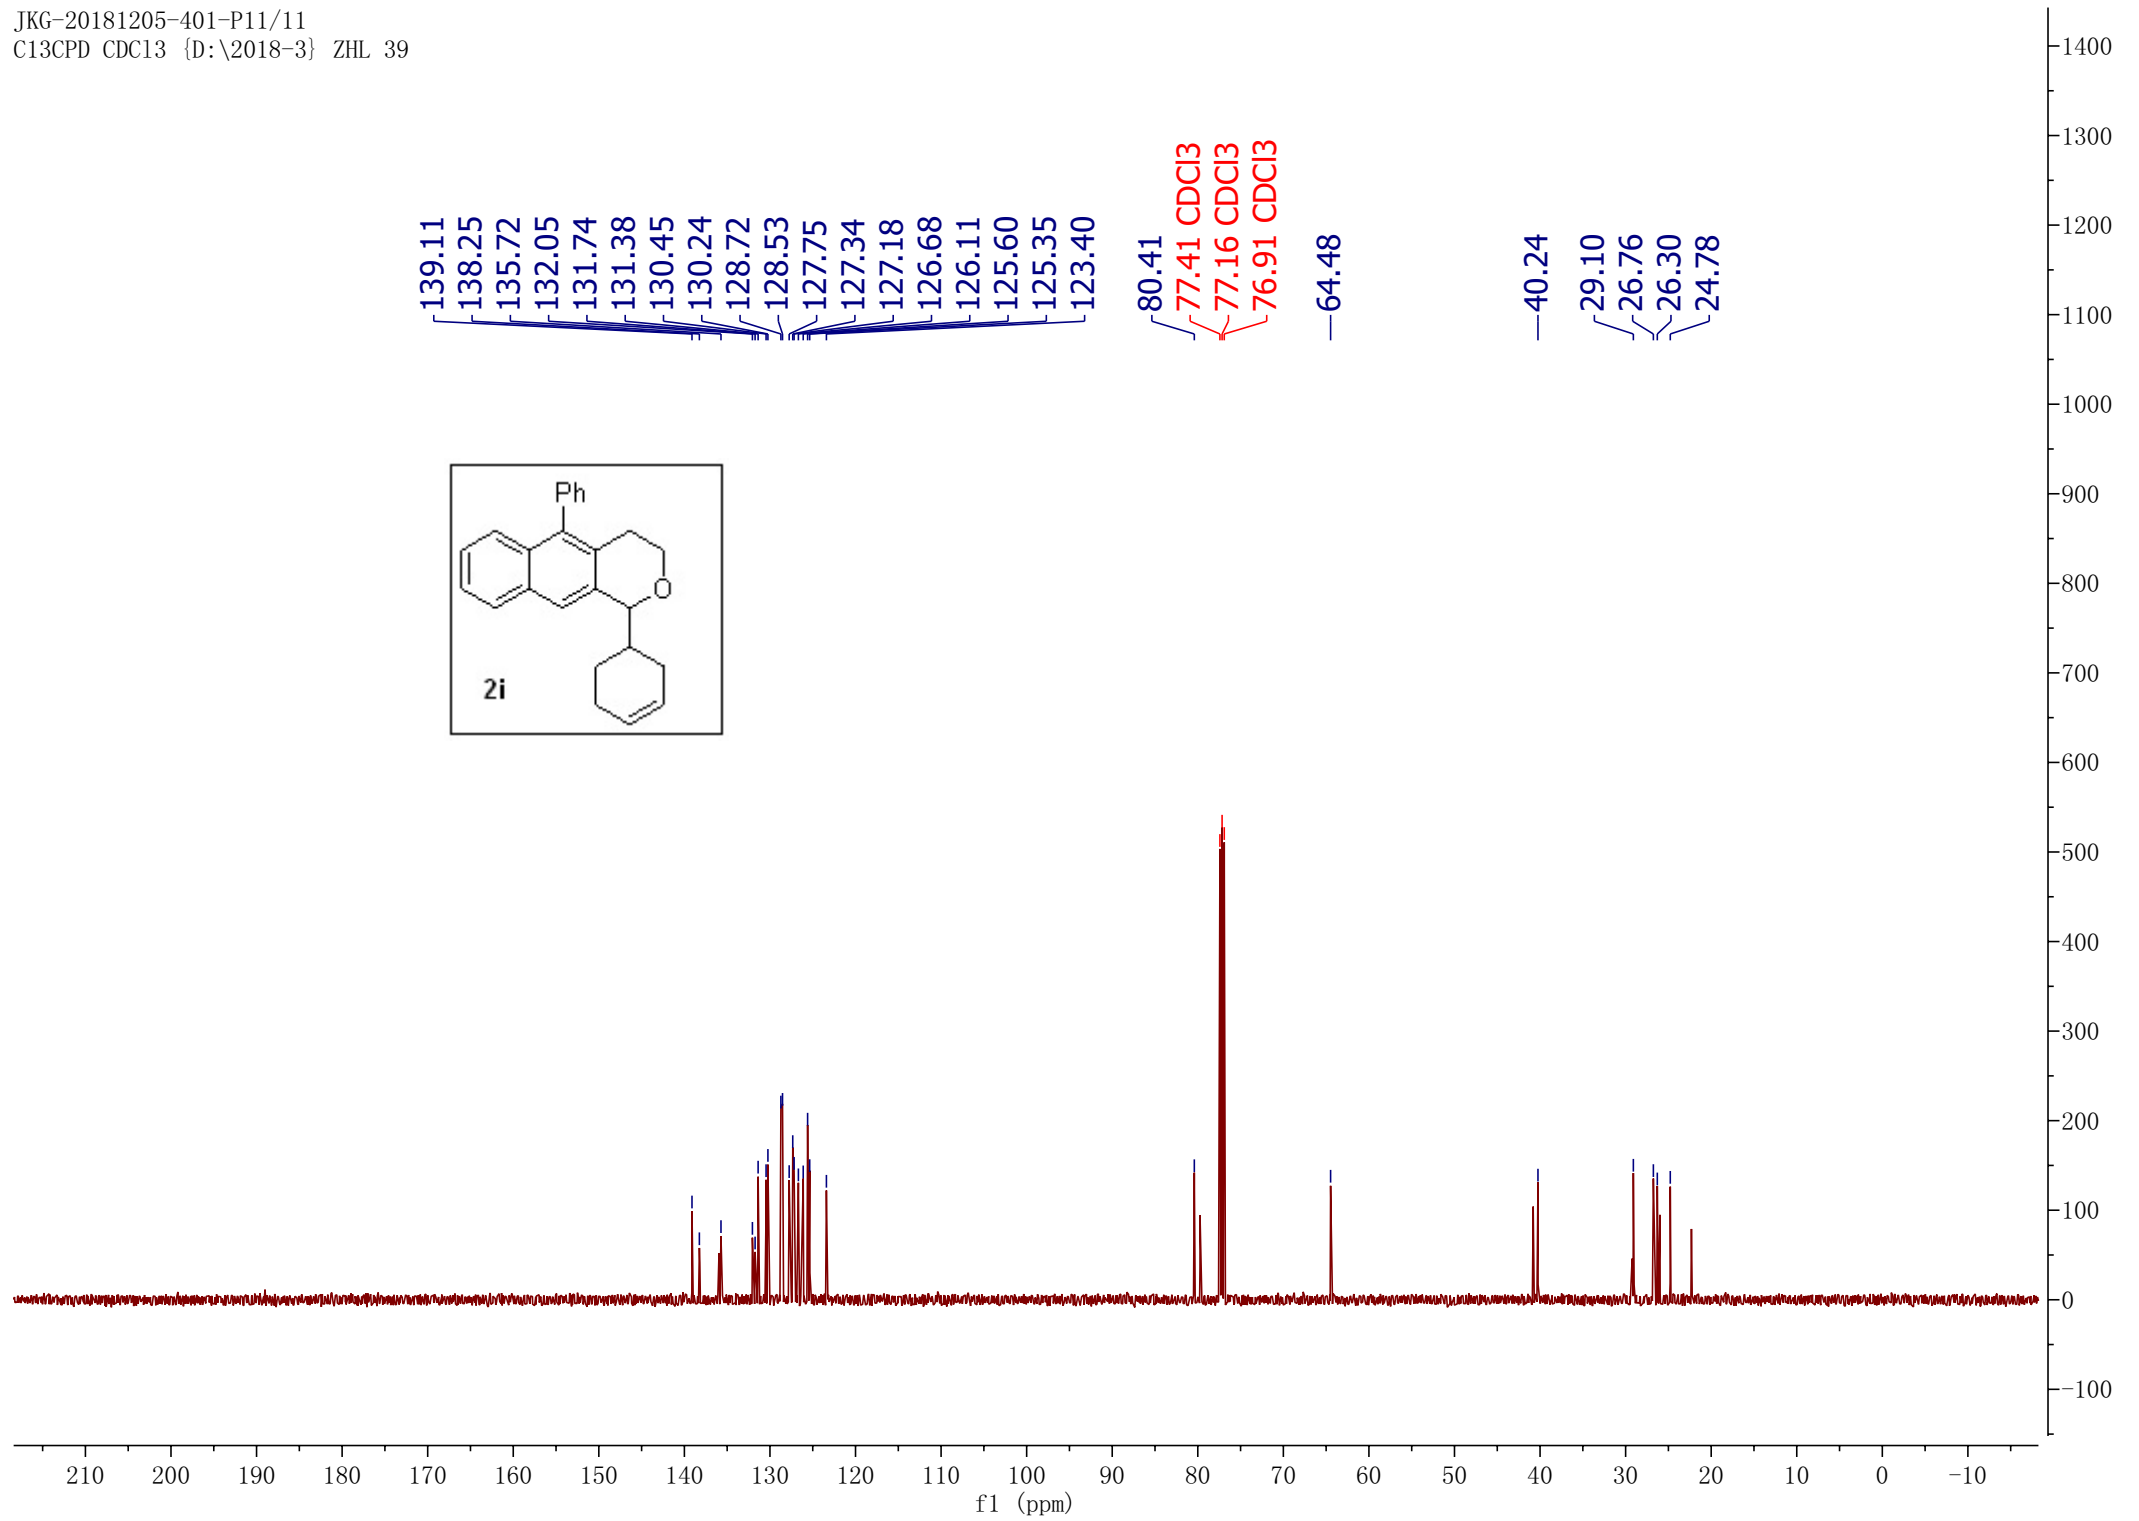

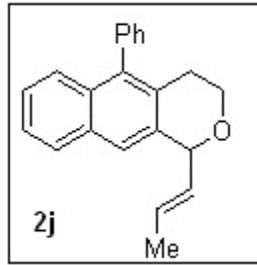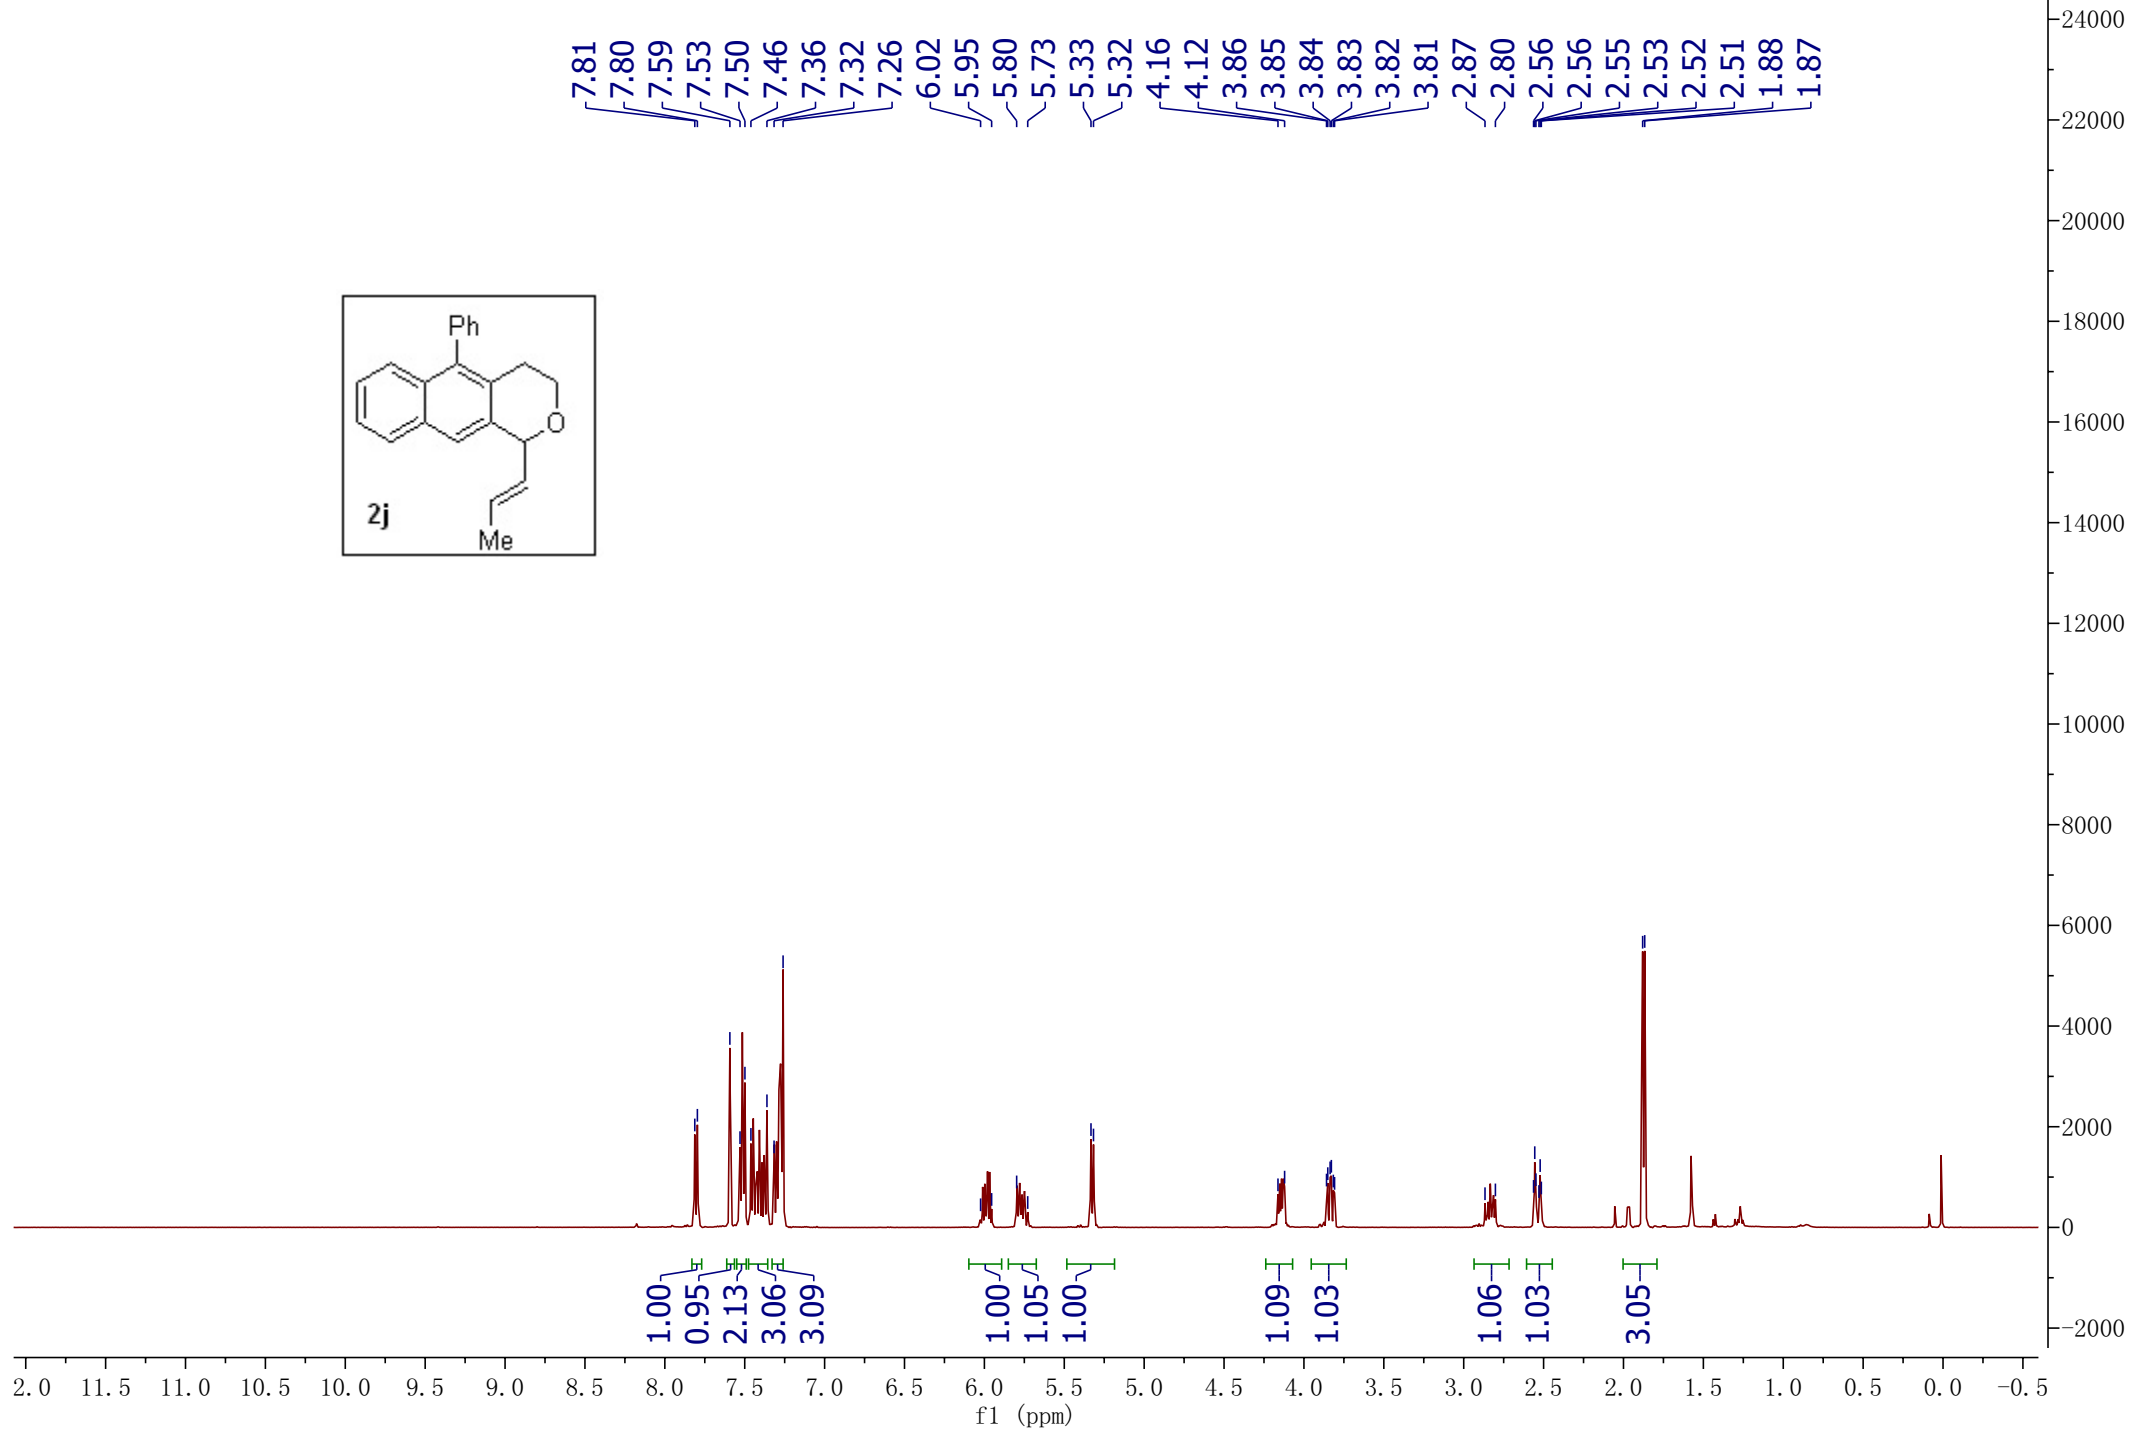



139.08  
138.49  
135.47  
131.87  
131.79  
131.57  
131.20  
130.21  
130.19  
129.95  
128.75  
128.64  
127.78  
127.36  
126.09  
125.72  
125.40  
124.69  
78.88  
77.42 CDC13  
77.16 CDC13  
76.91 CDC13  
64.13

28.60

18.08

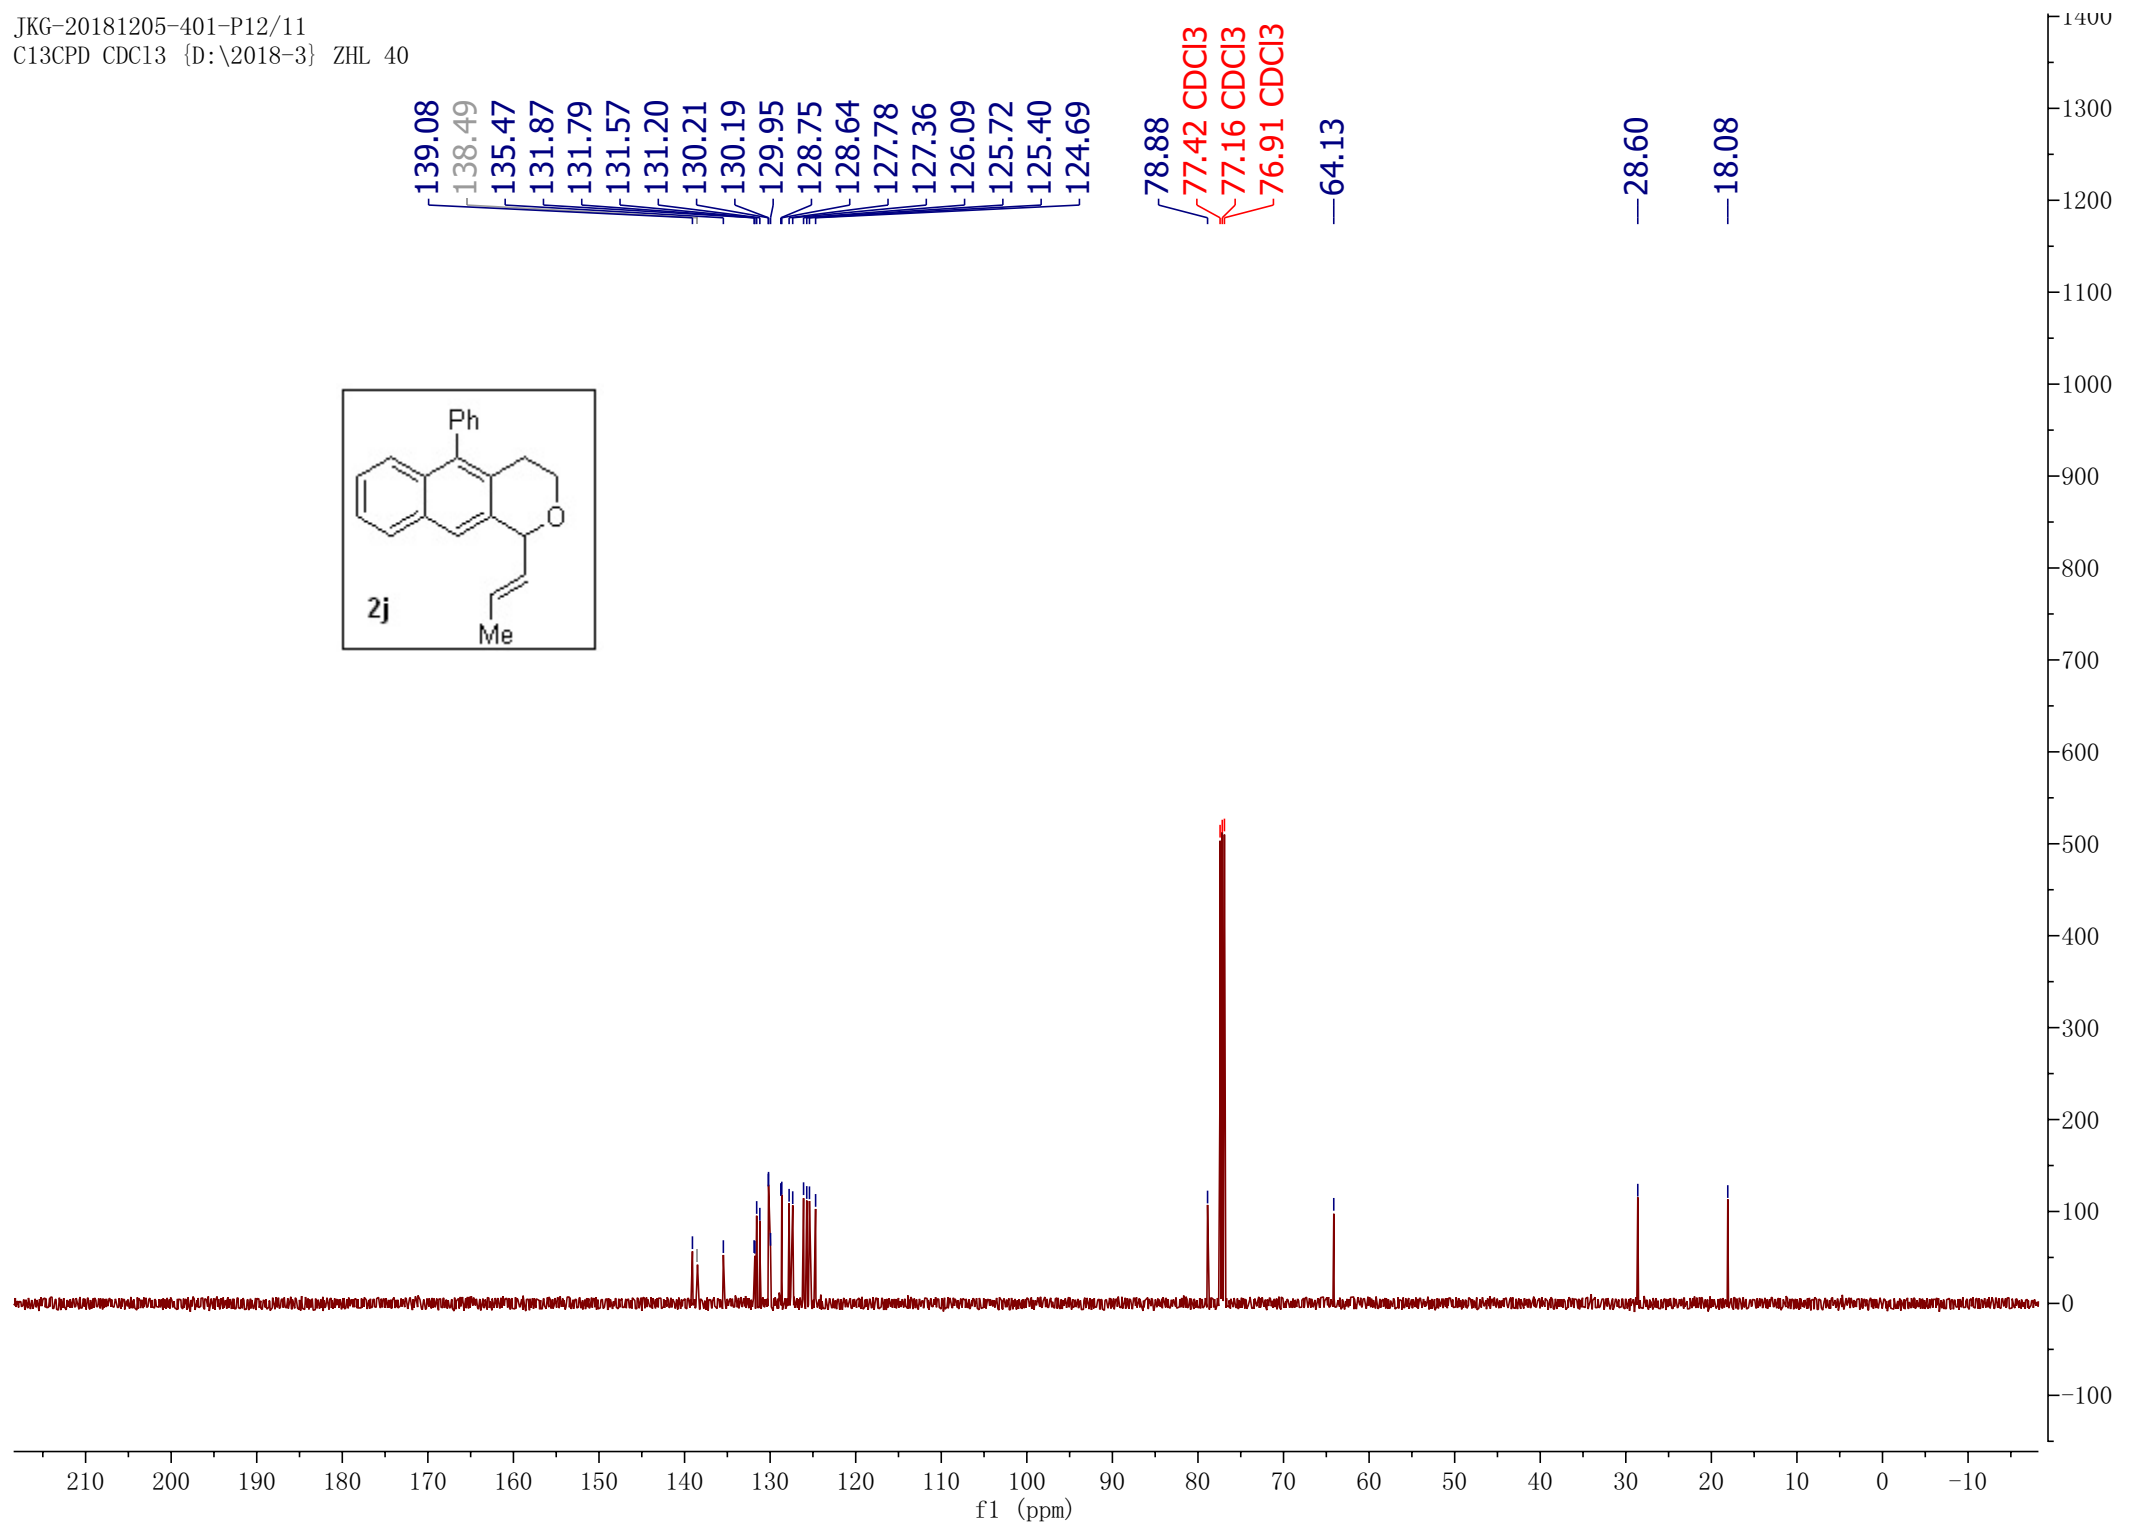

7.70  
7.69  
7.57  
7.56  
7.55  
7.55  
7.54  
7.54  
7.50  
7.47  
7.44  
7.29  
7.26  
7.25  
7.23  
7.10  
7.09  
7.07  
— 6.35

4.22  
4.18  
3.98  
3.98  
3.96  
3.95  
3.94  
3.93  
3.04  
2.97  
2.68  
2.67  
2.66  
2.65  
2.64  
2.63

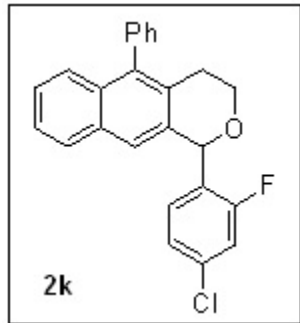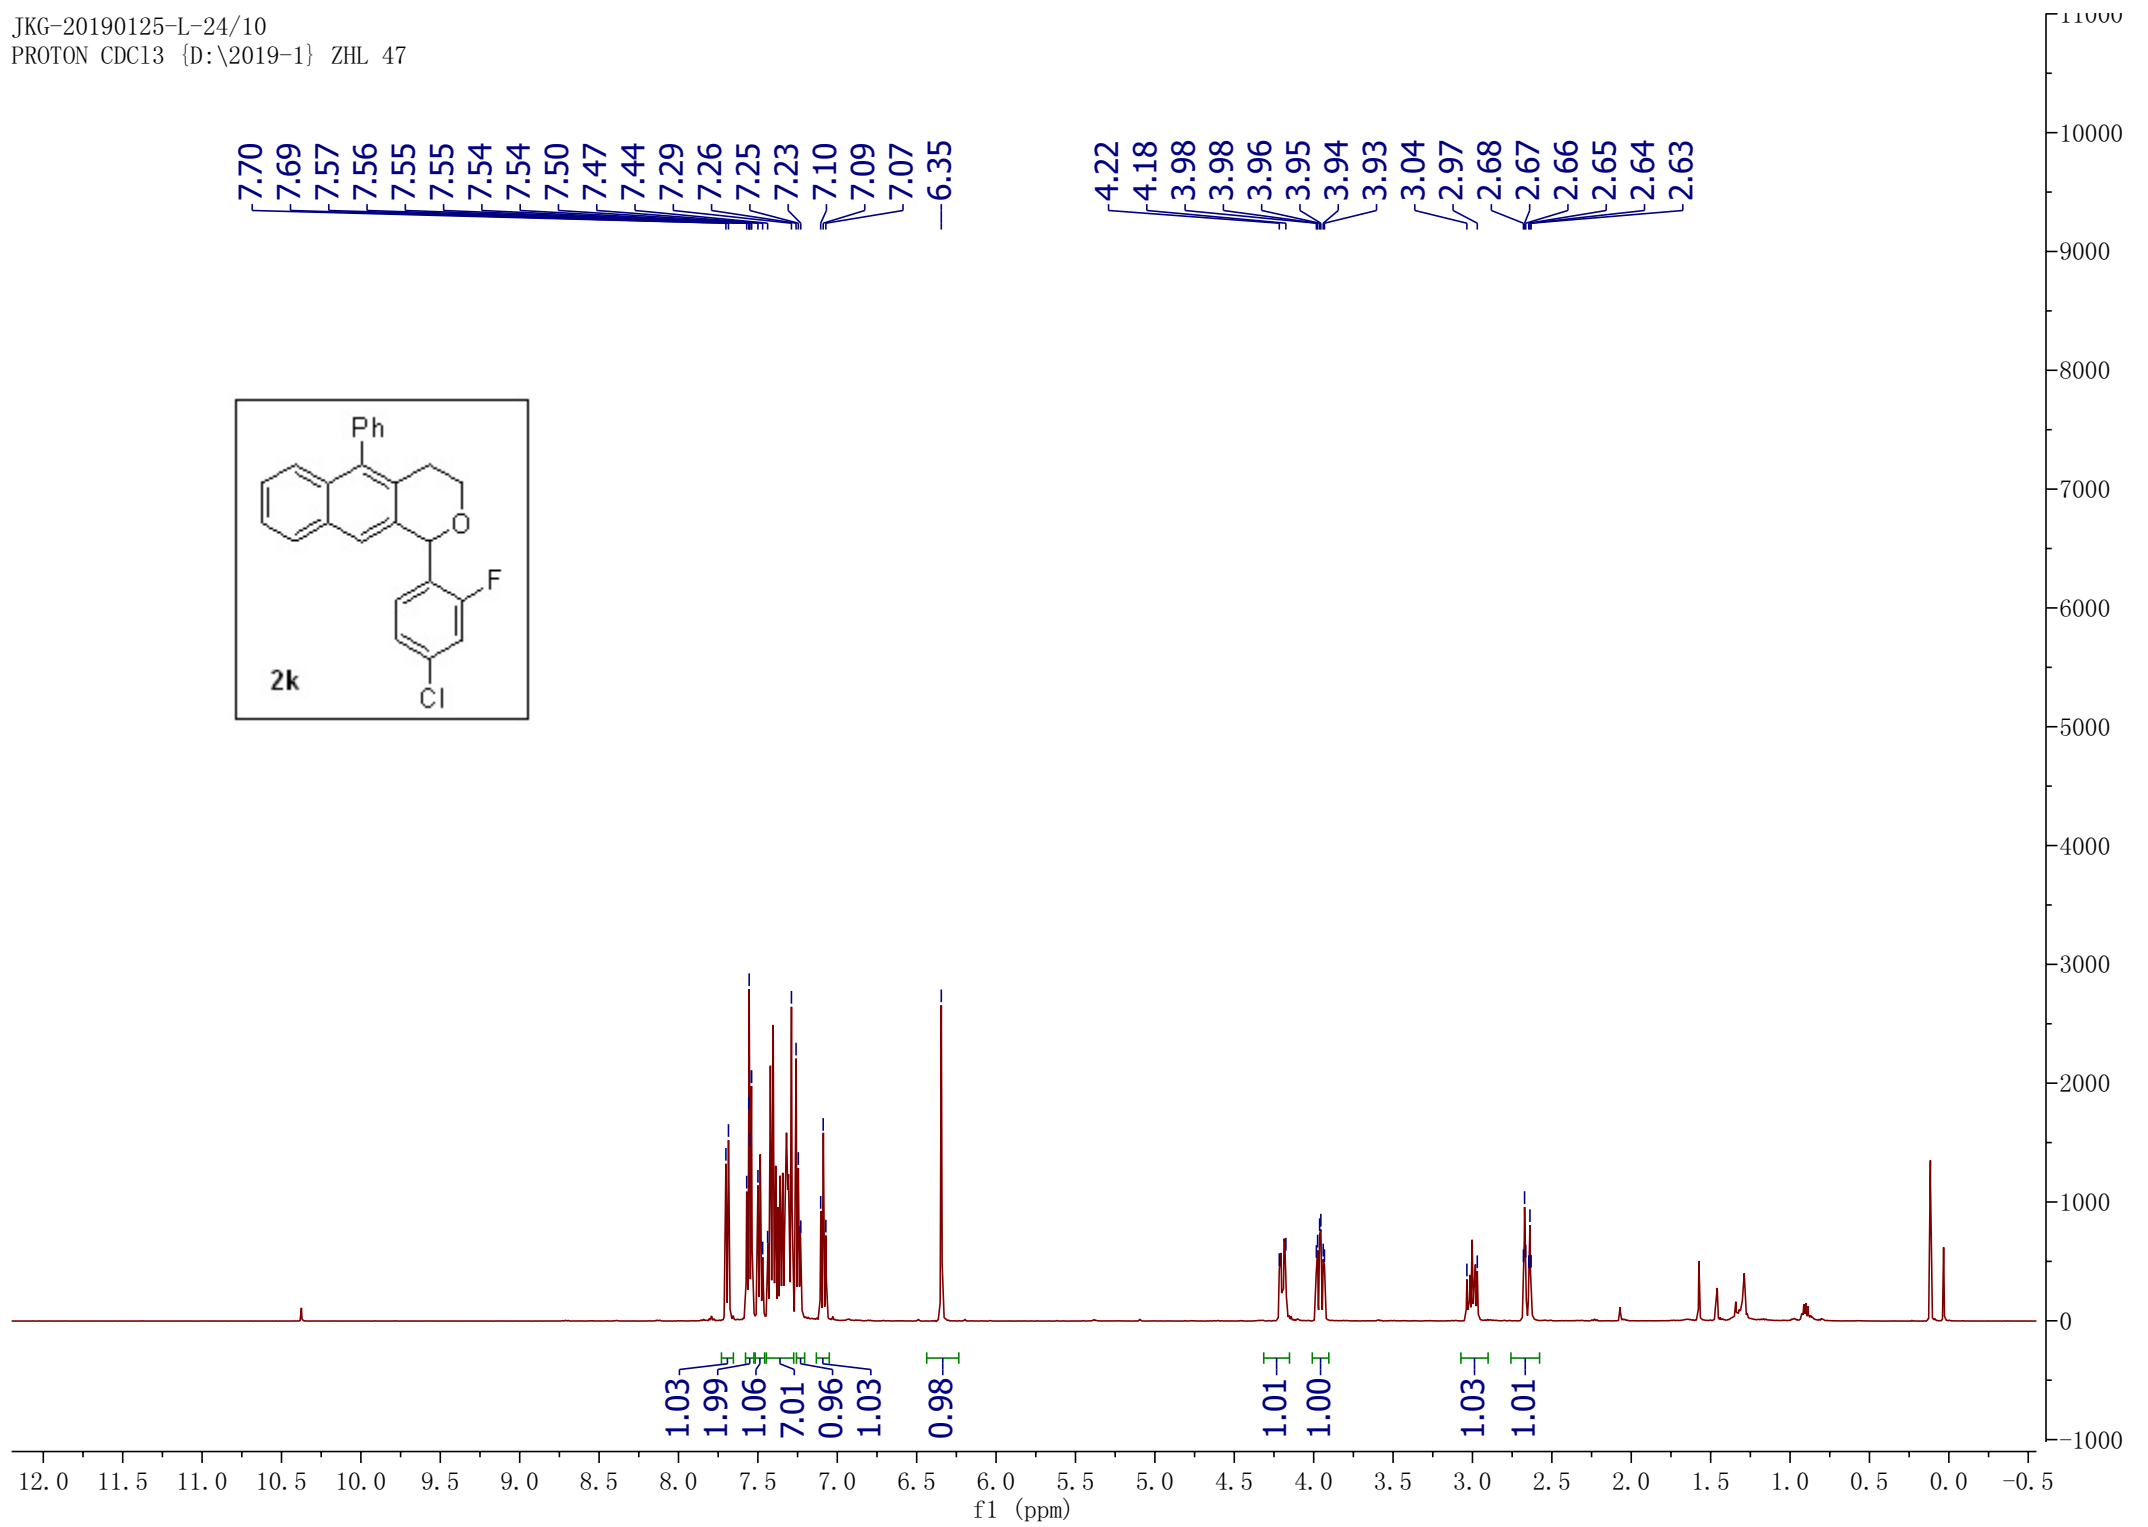

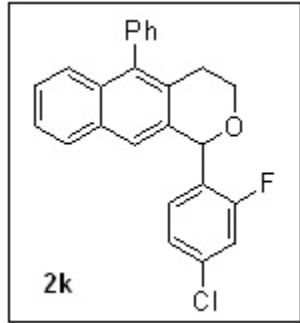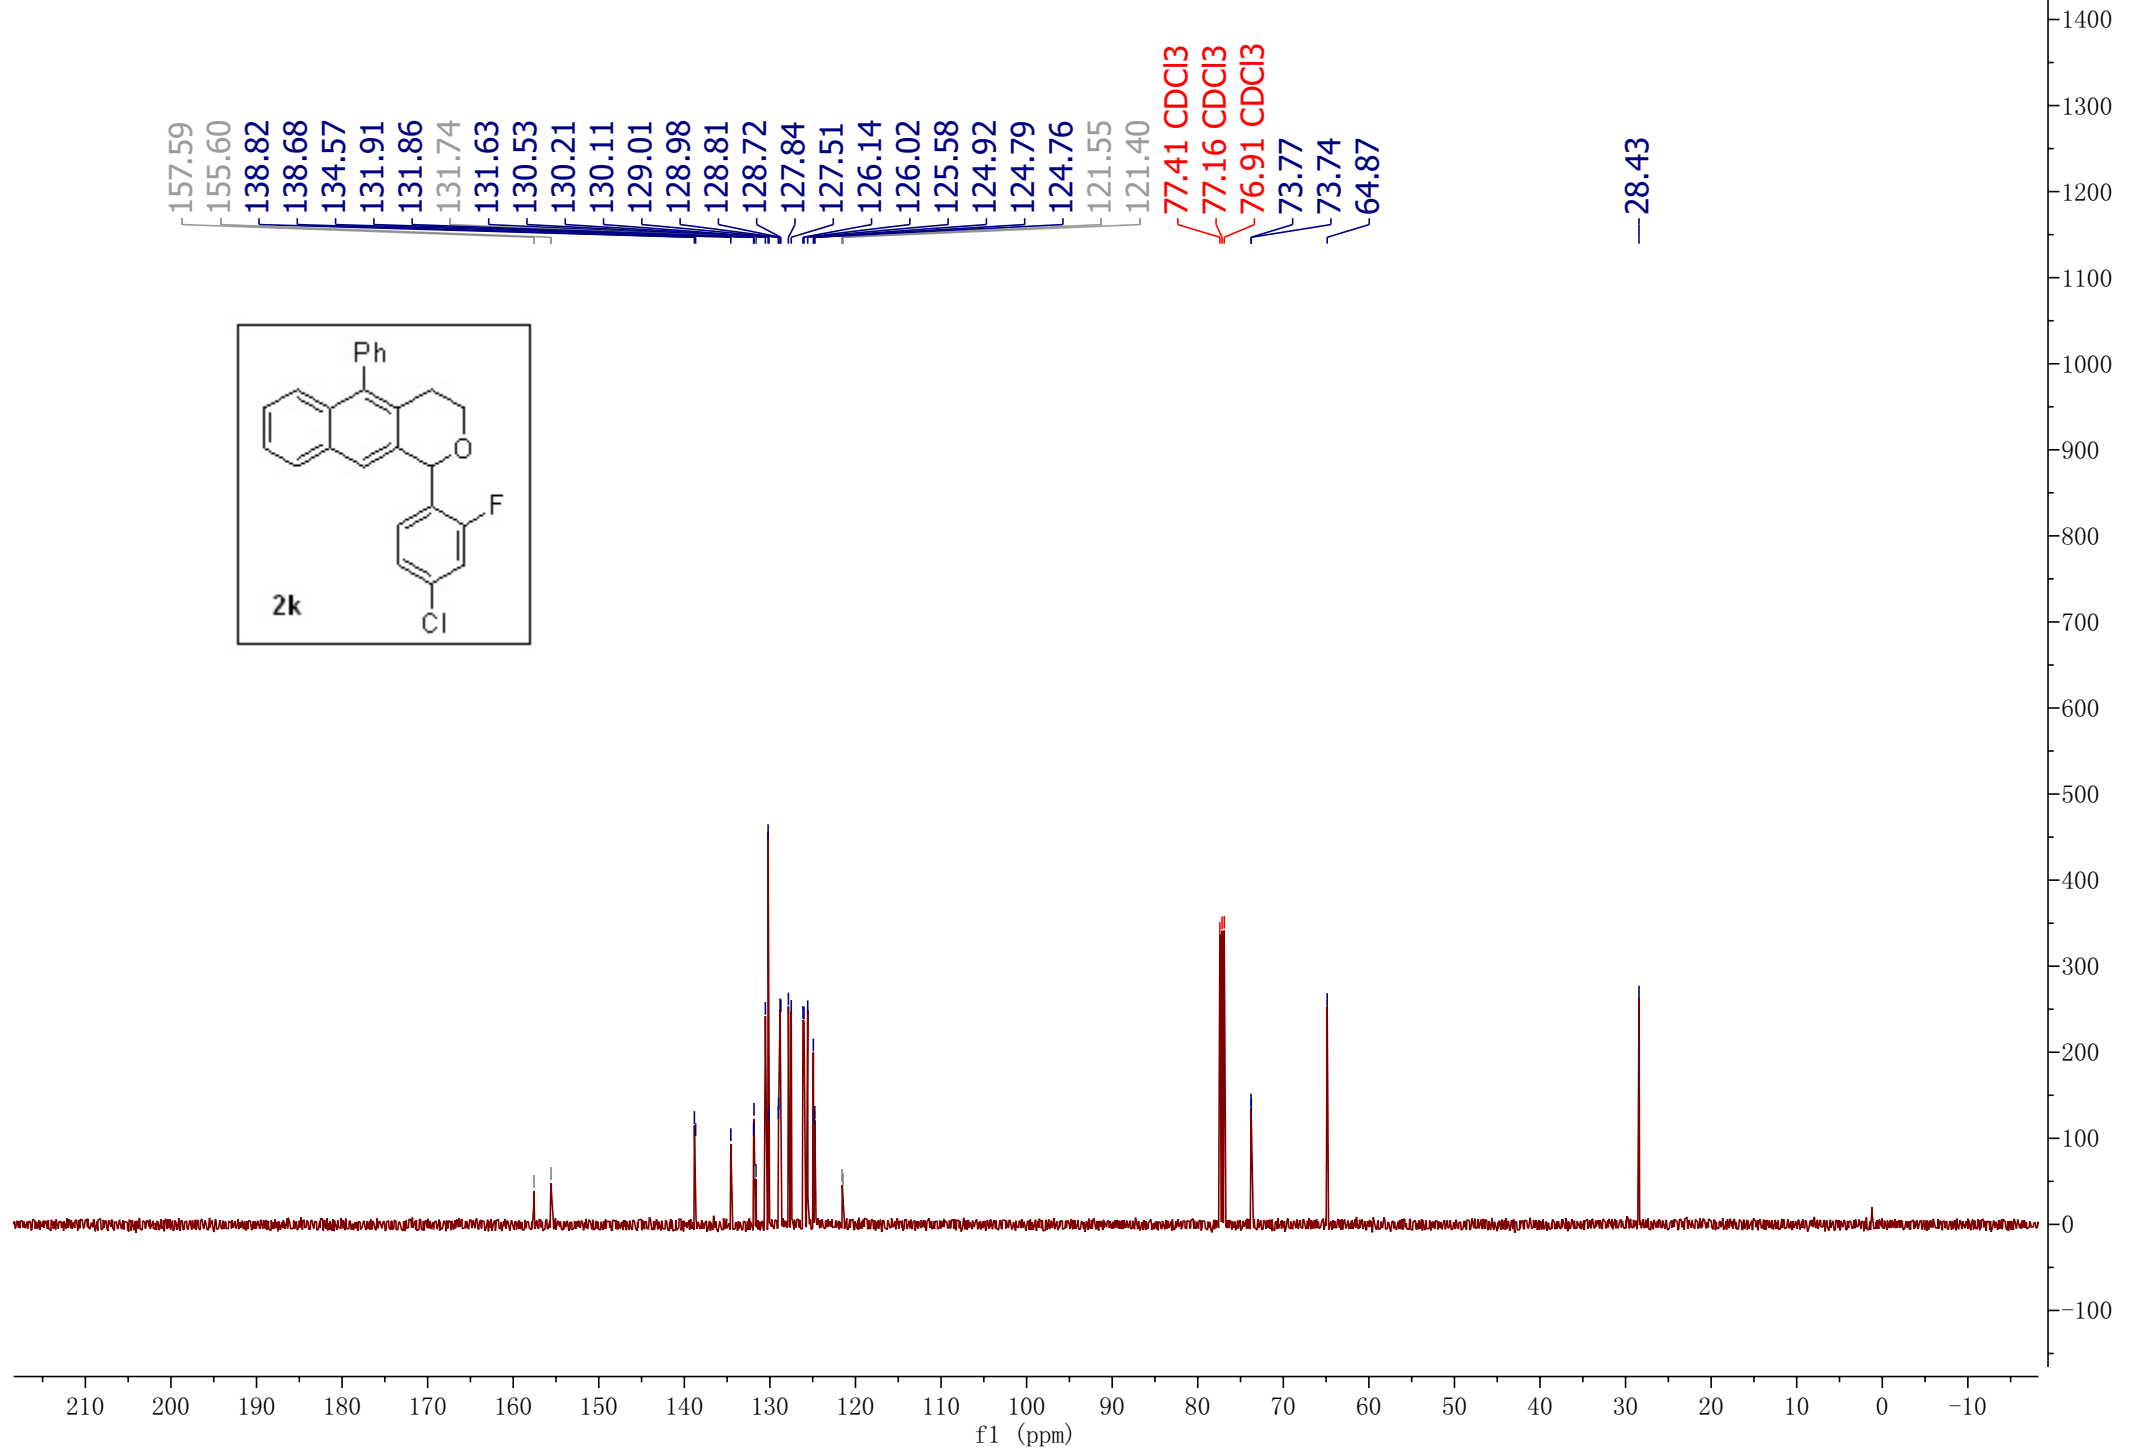

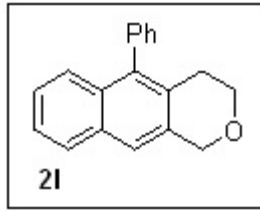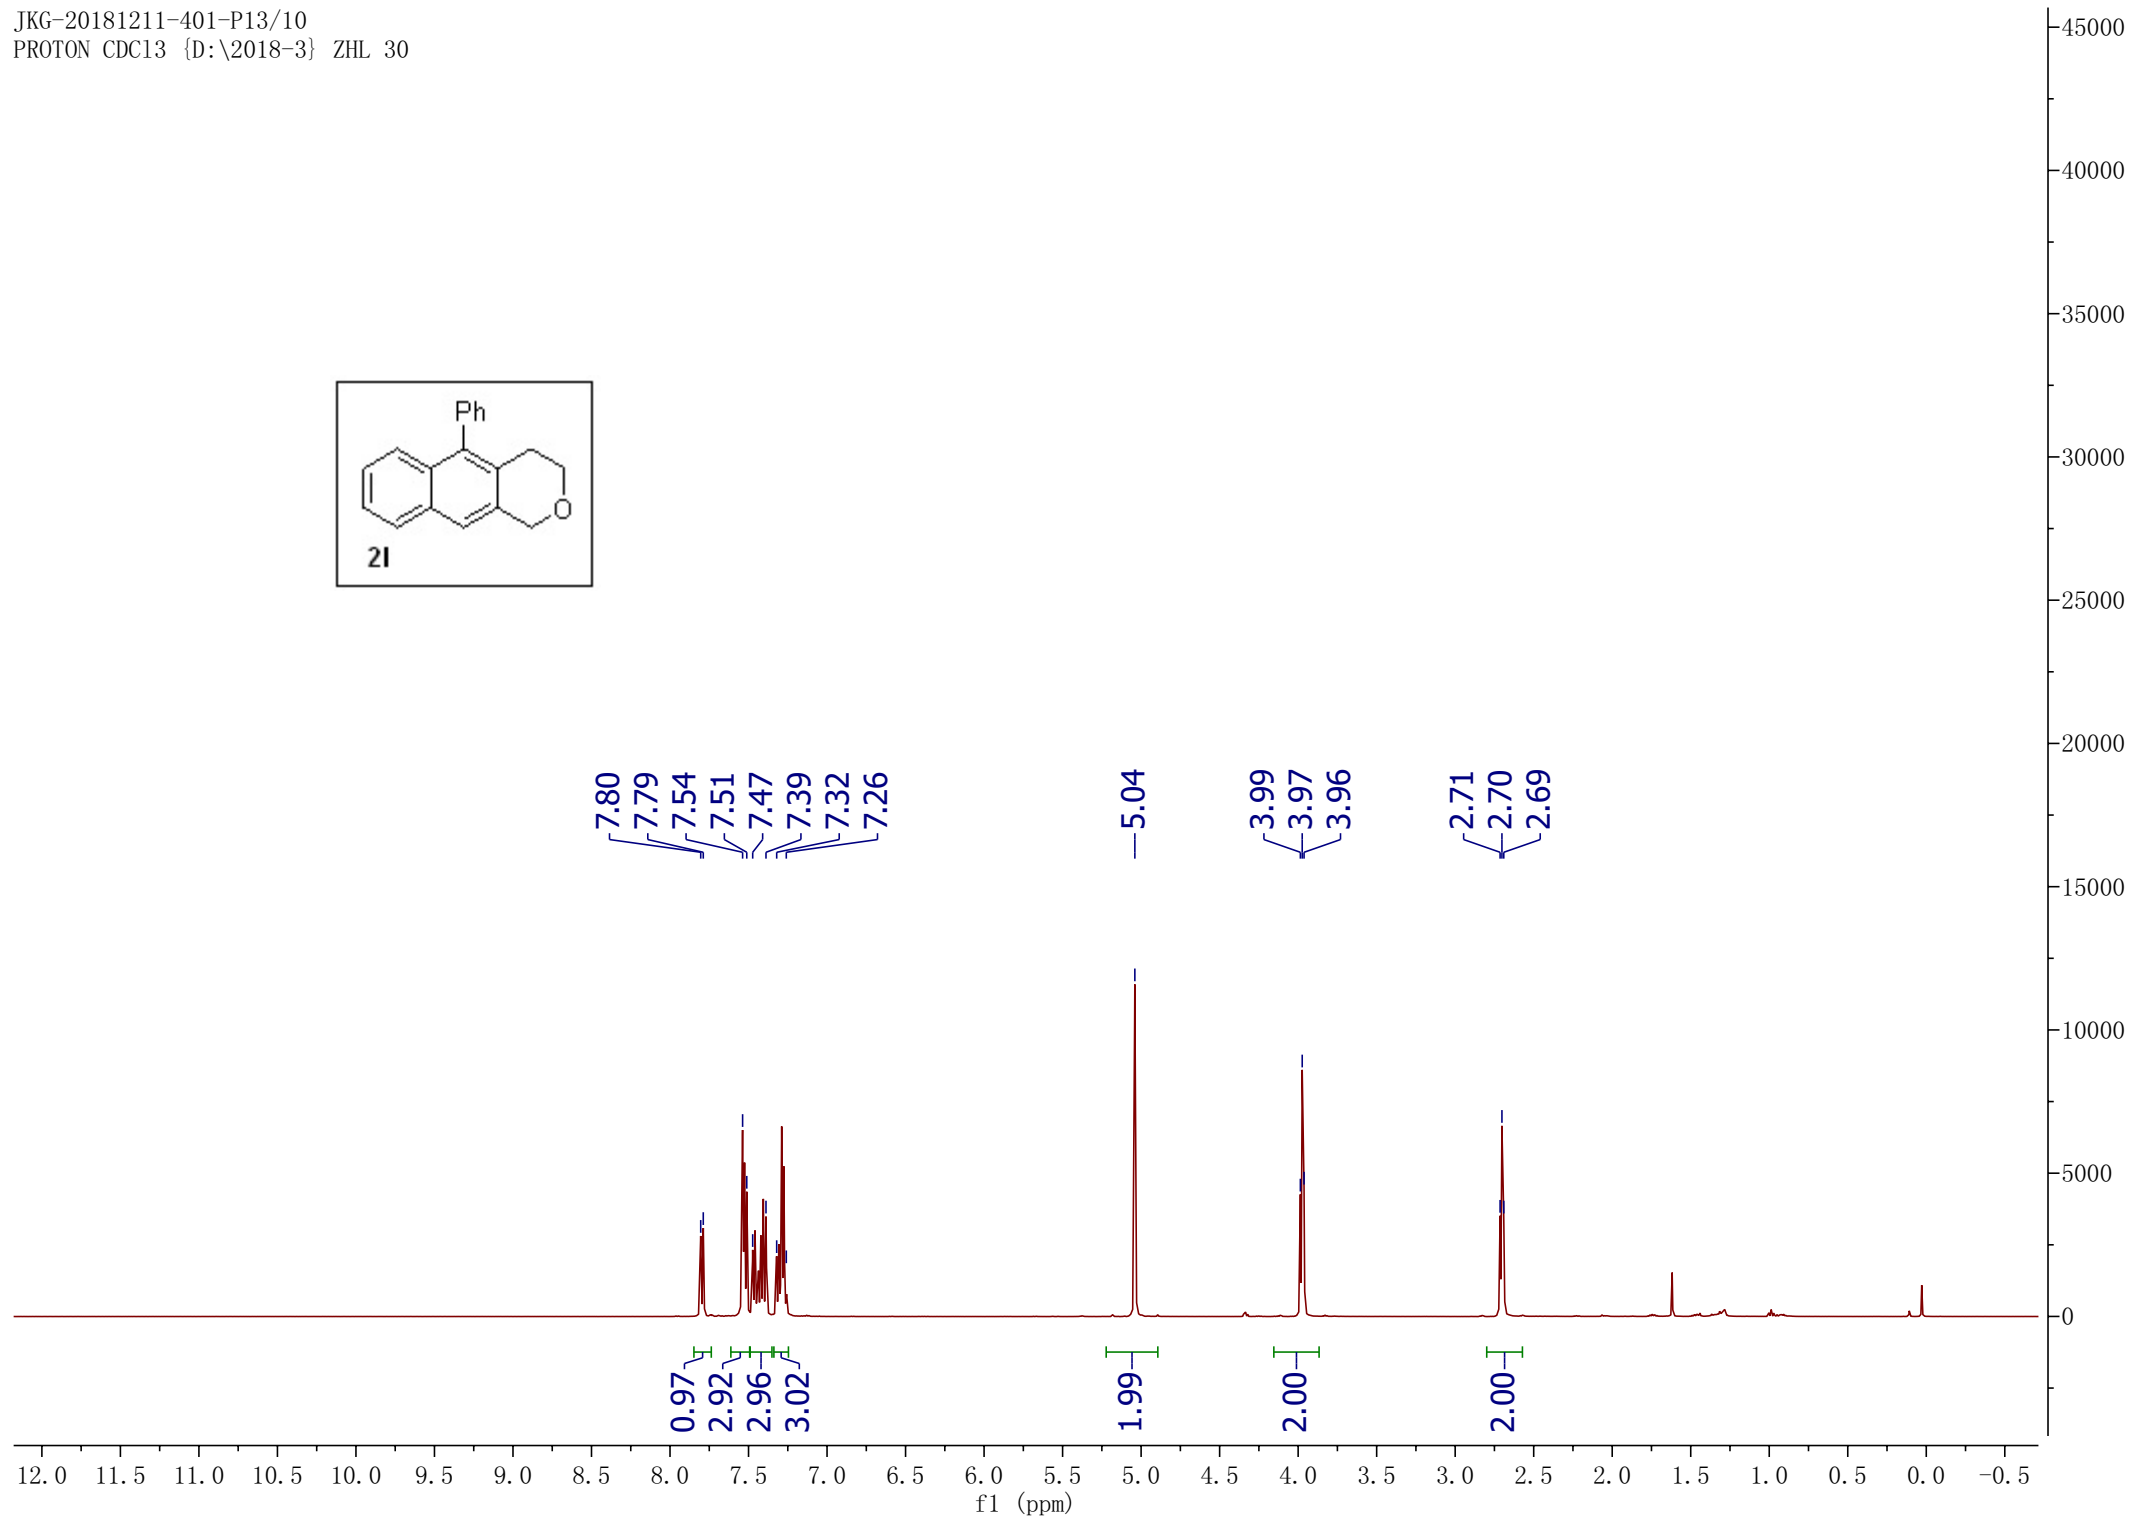



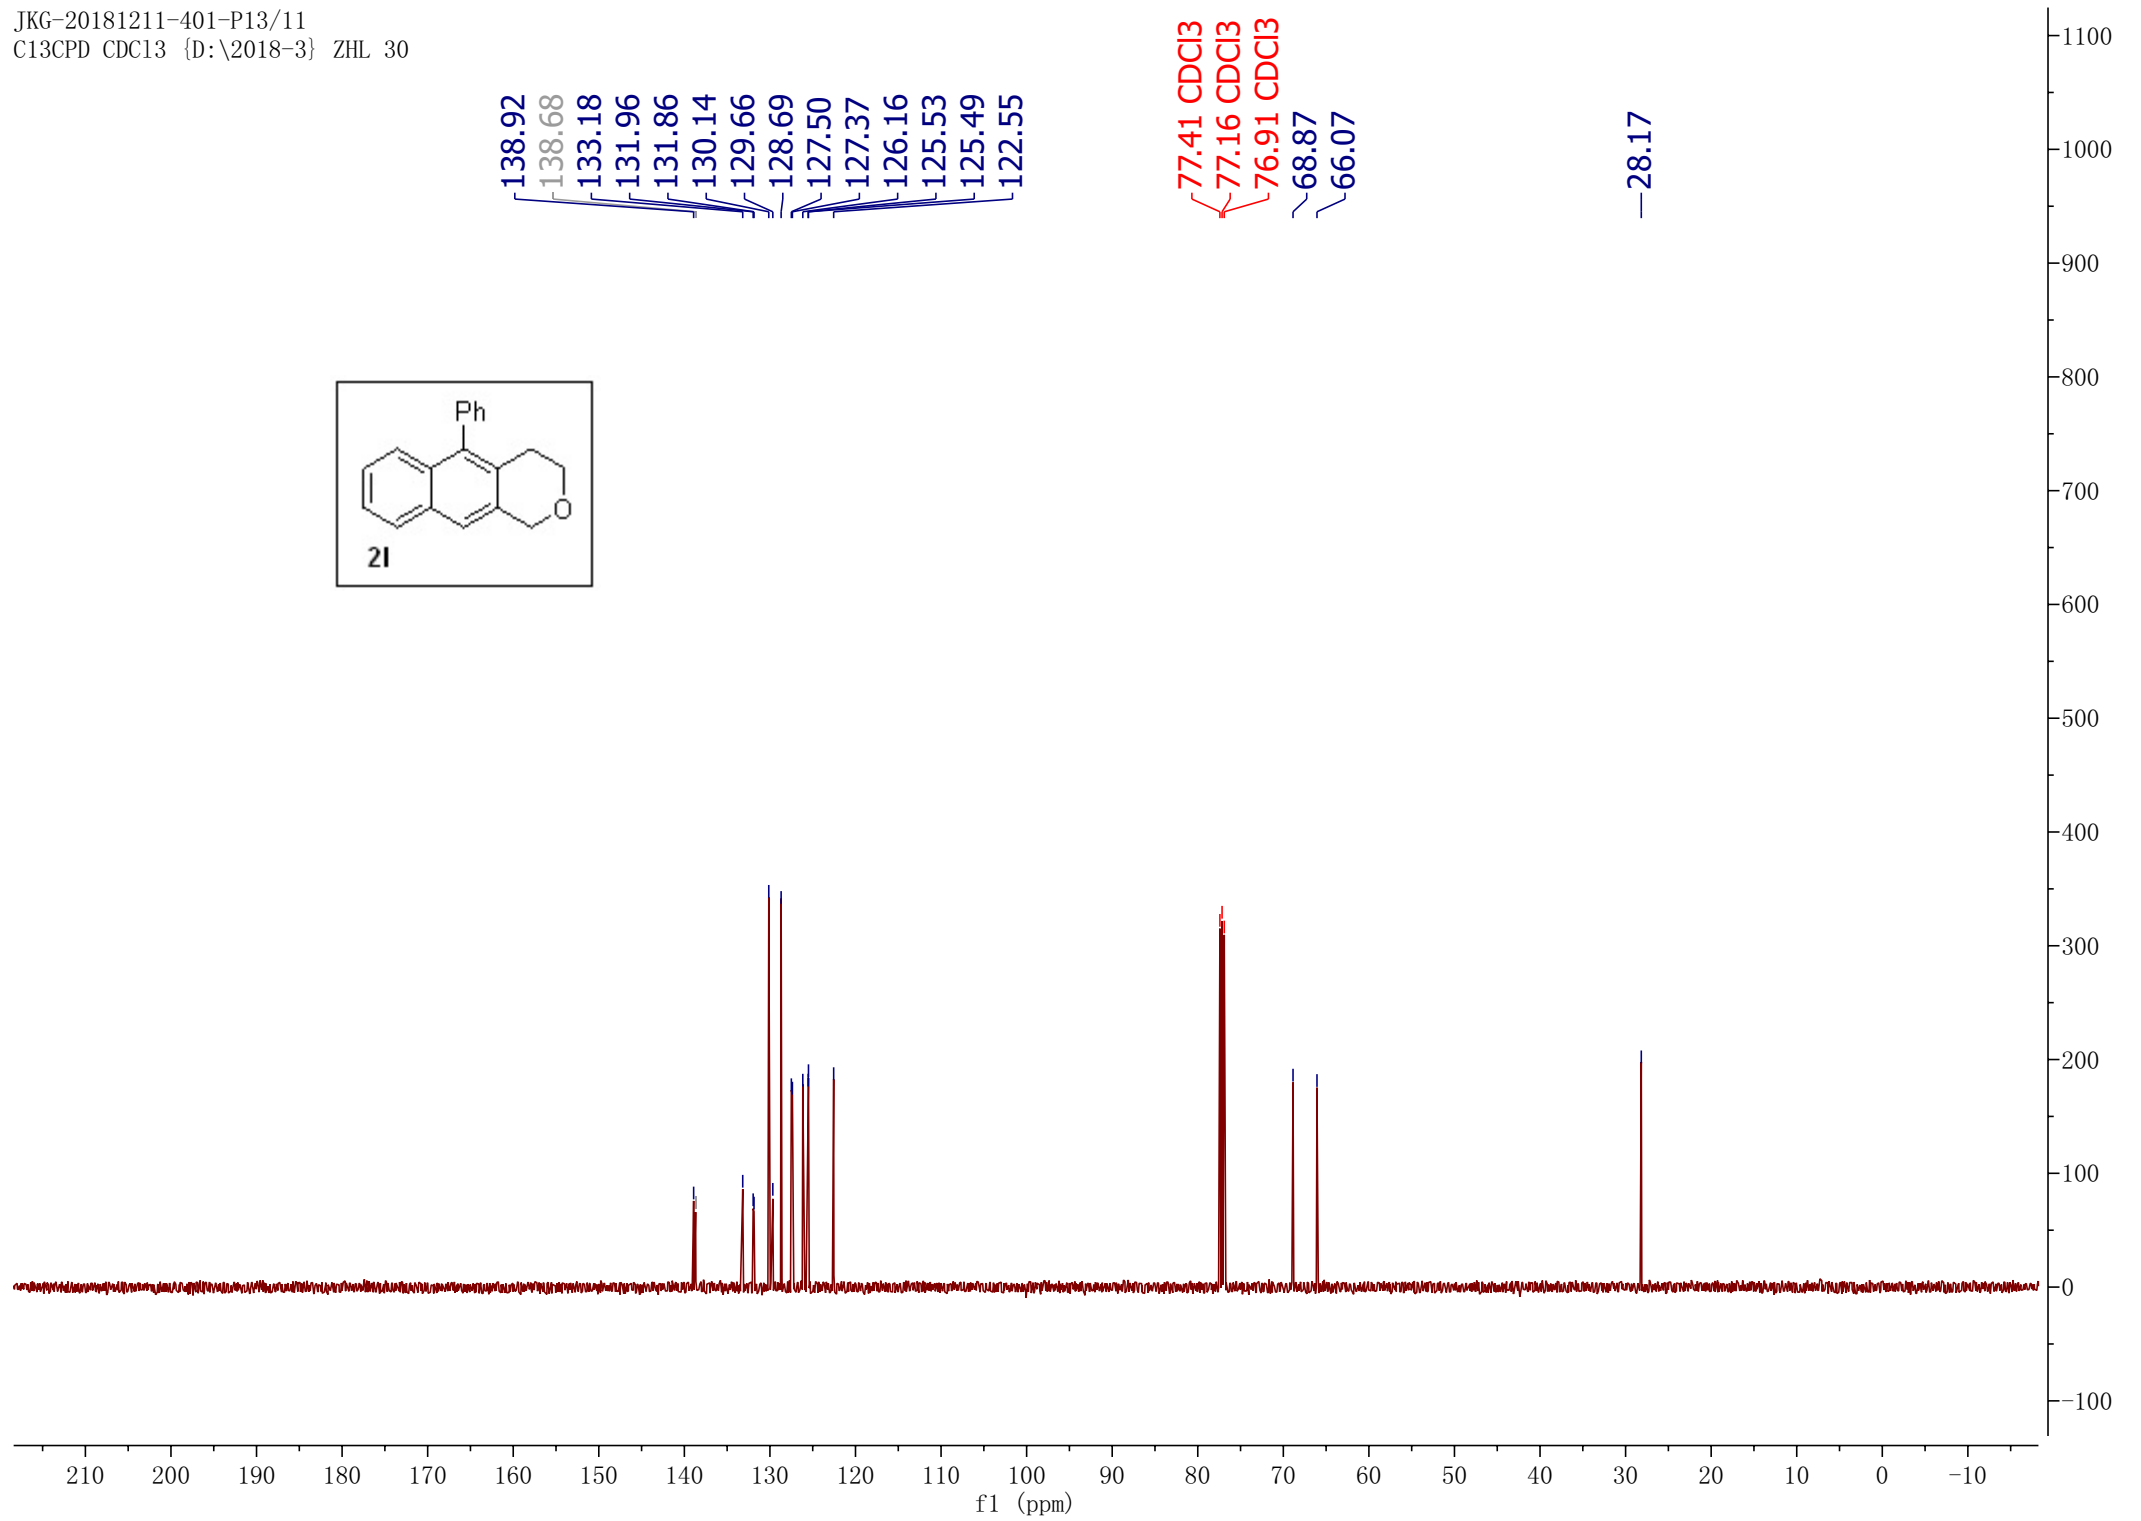

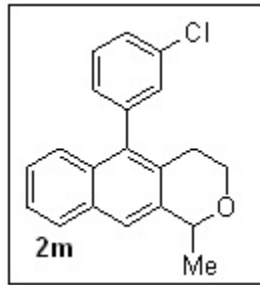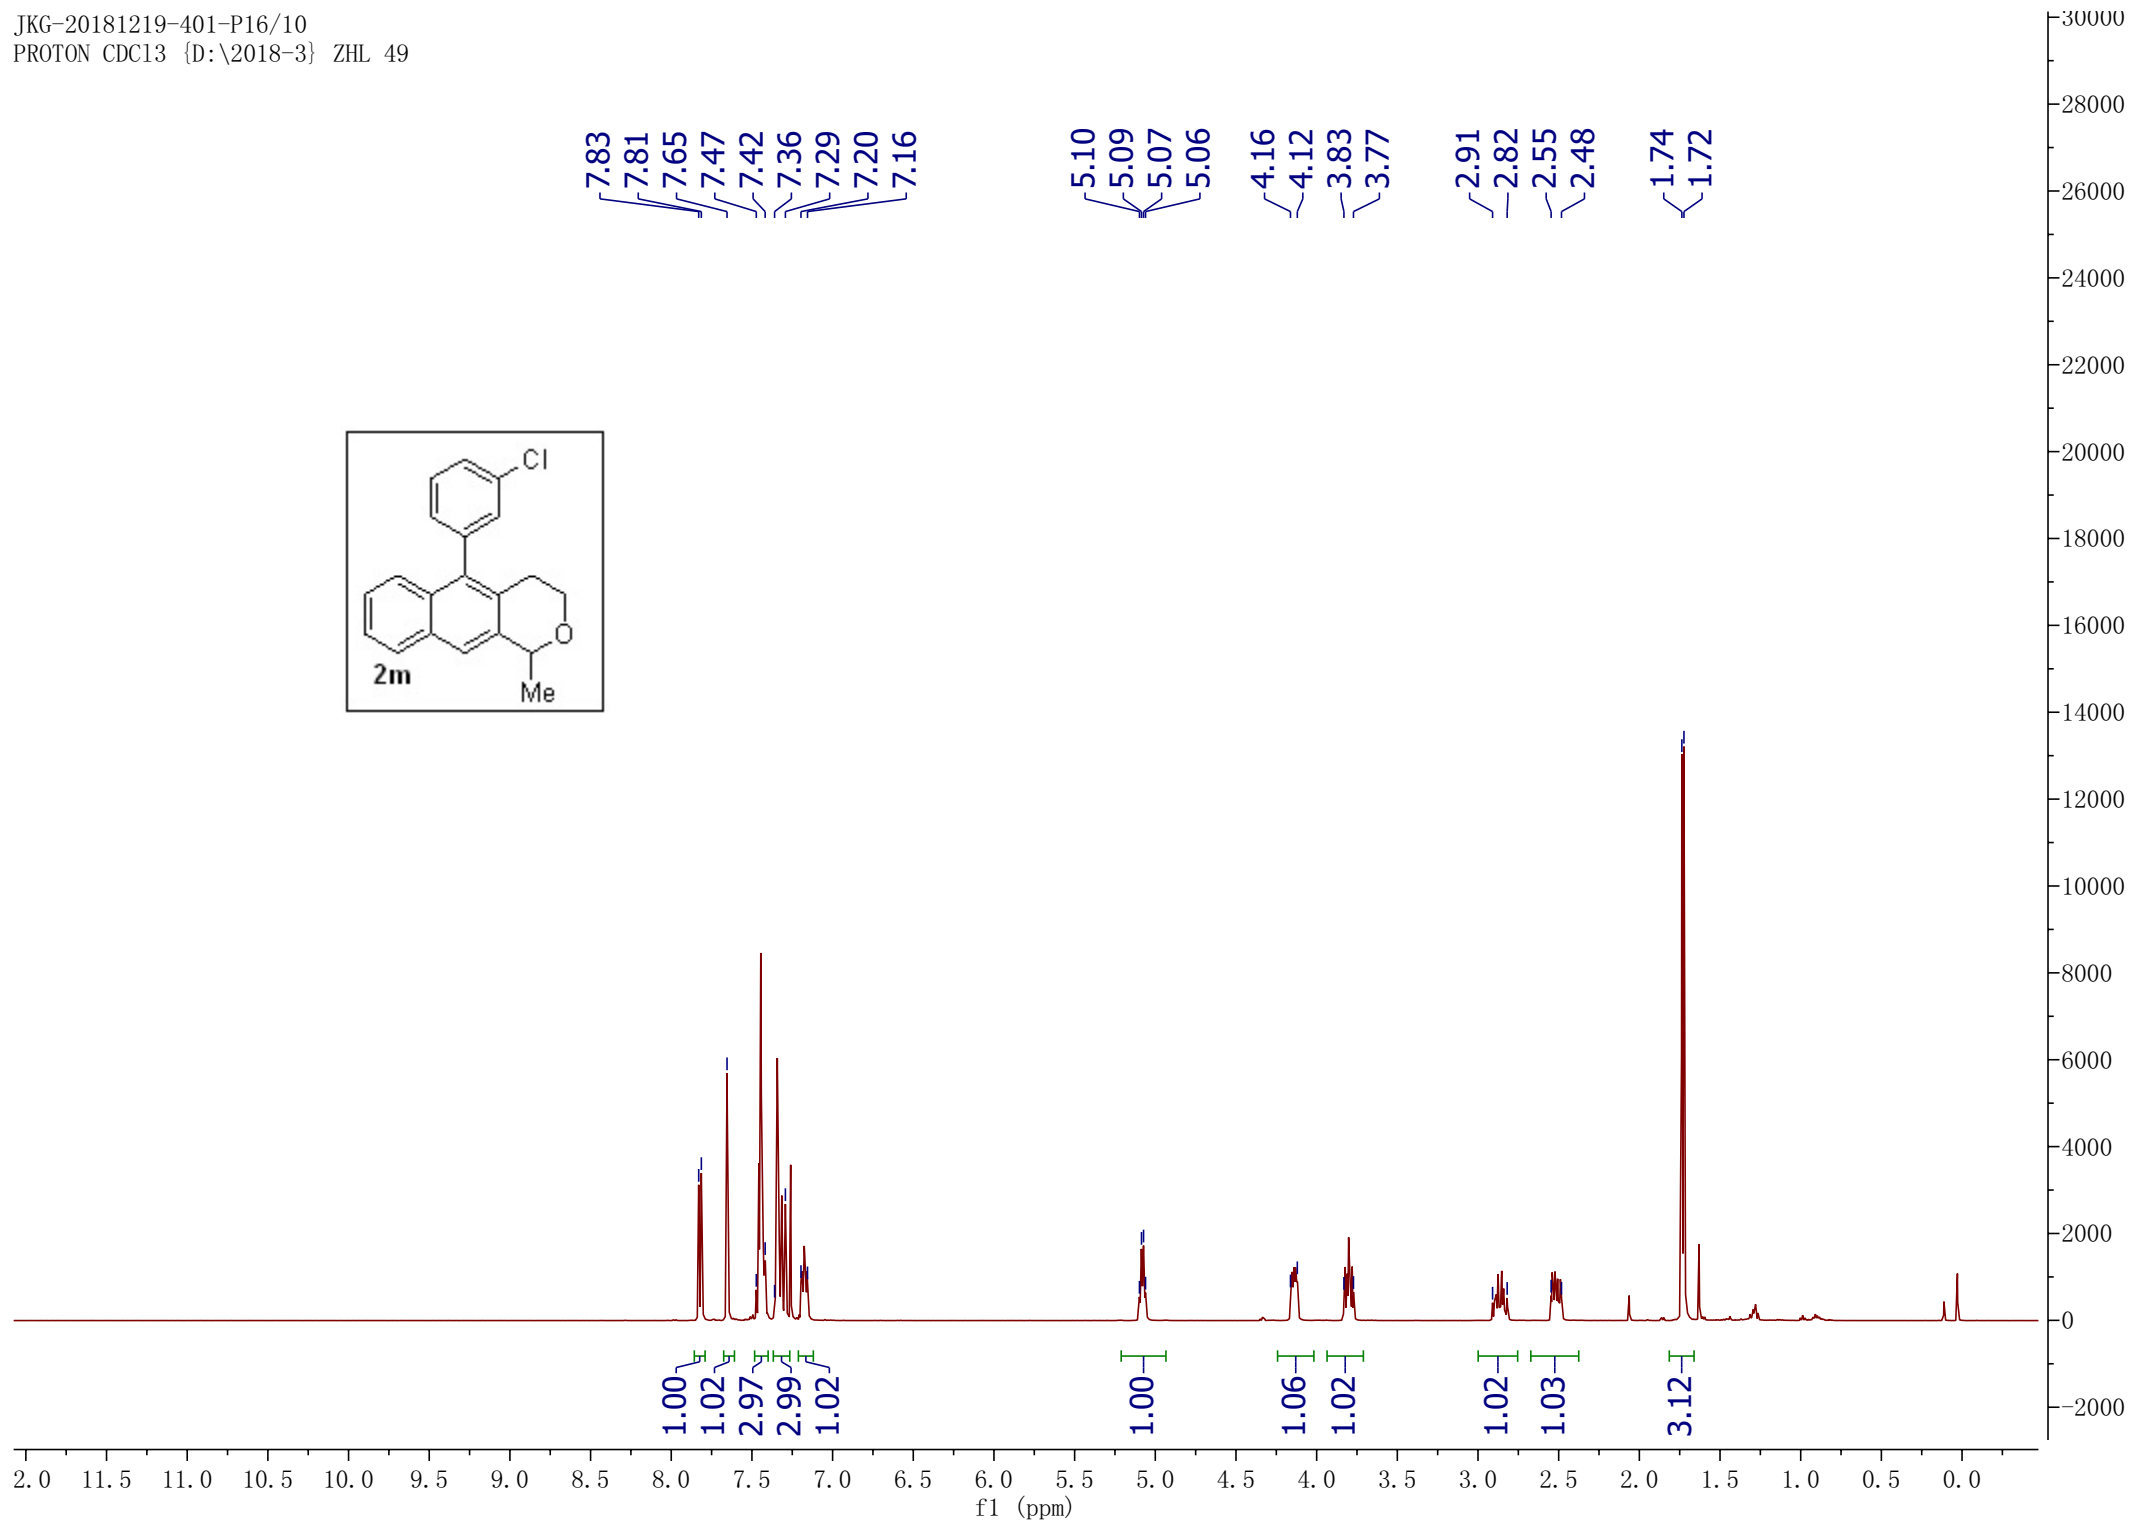



141.09  
138.10  
136.86  
134.58  
132.03  
131.33  
130.27  
130.10  
129.96  
128.49  
127.82  
127.63  
125.92  
125.72  
125.58  
123.59

77.41 CDC13  
77.16 CDC13  
76.91 CDC13  
73.12  
64.20

28.80  
22.37

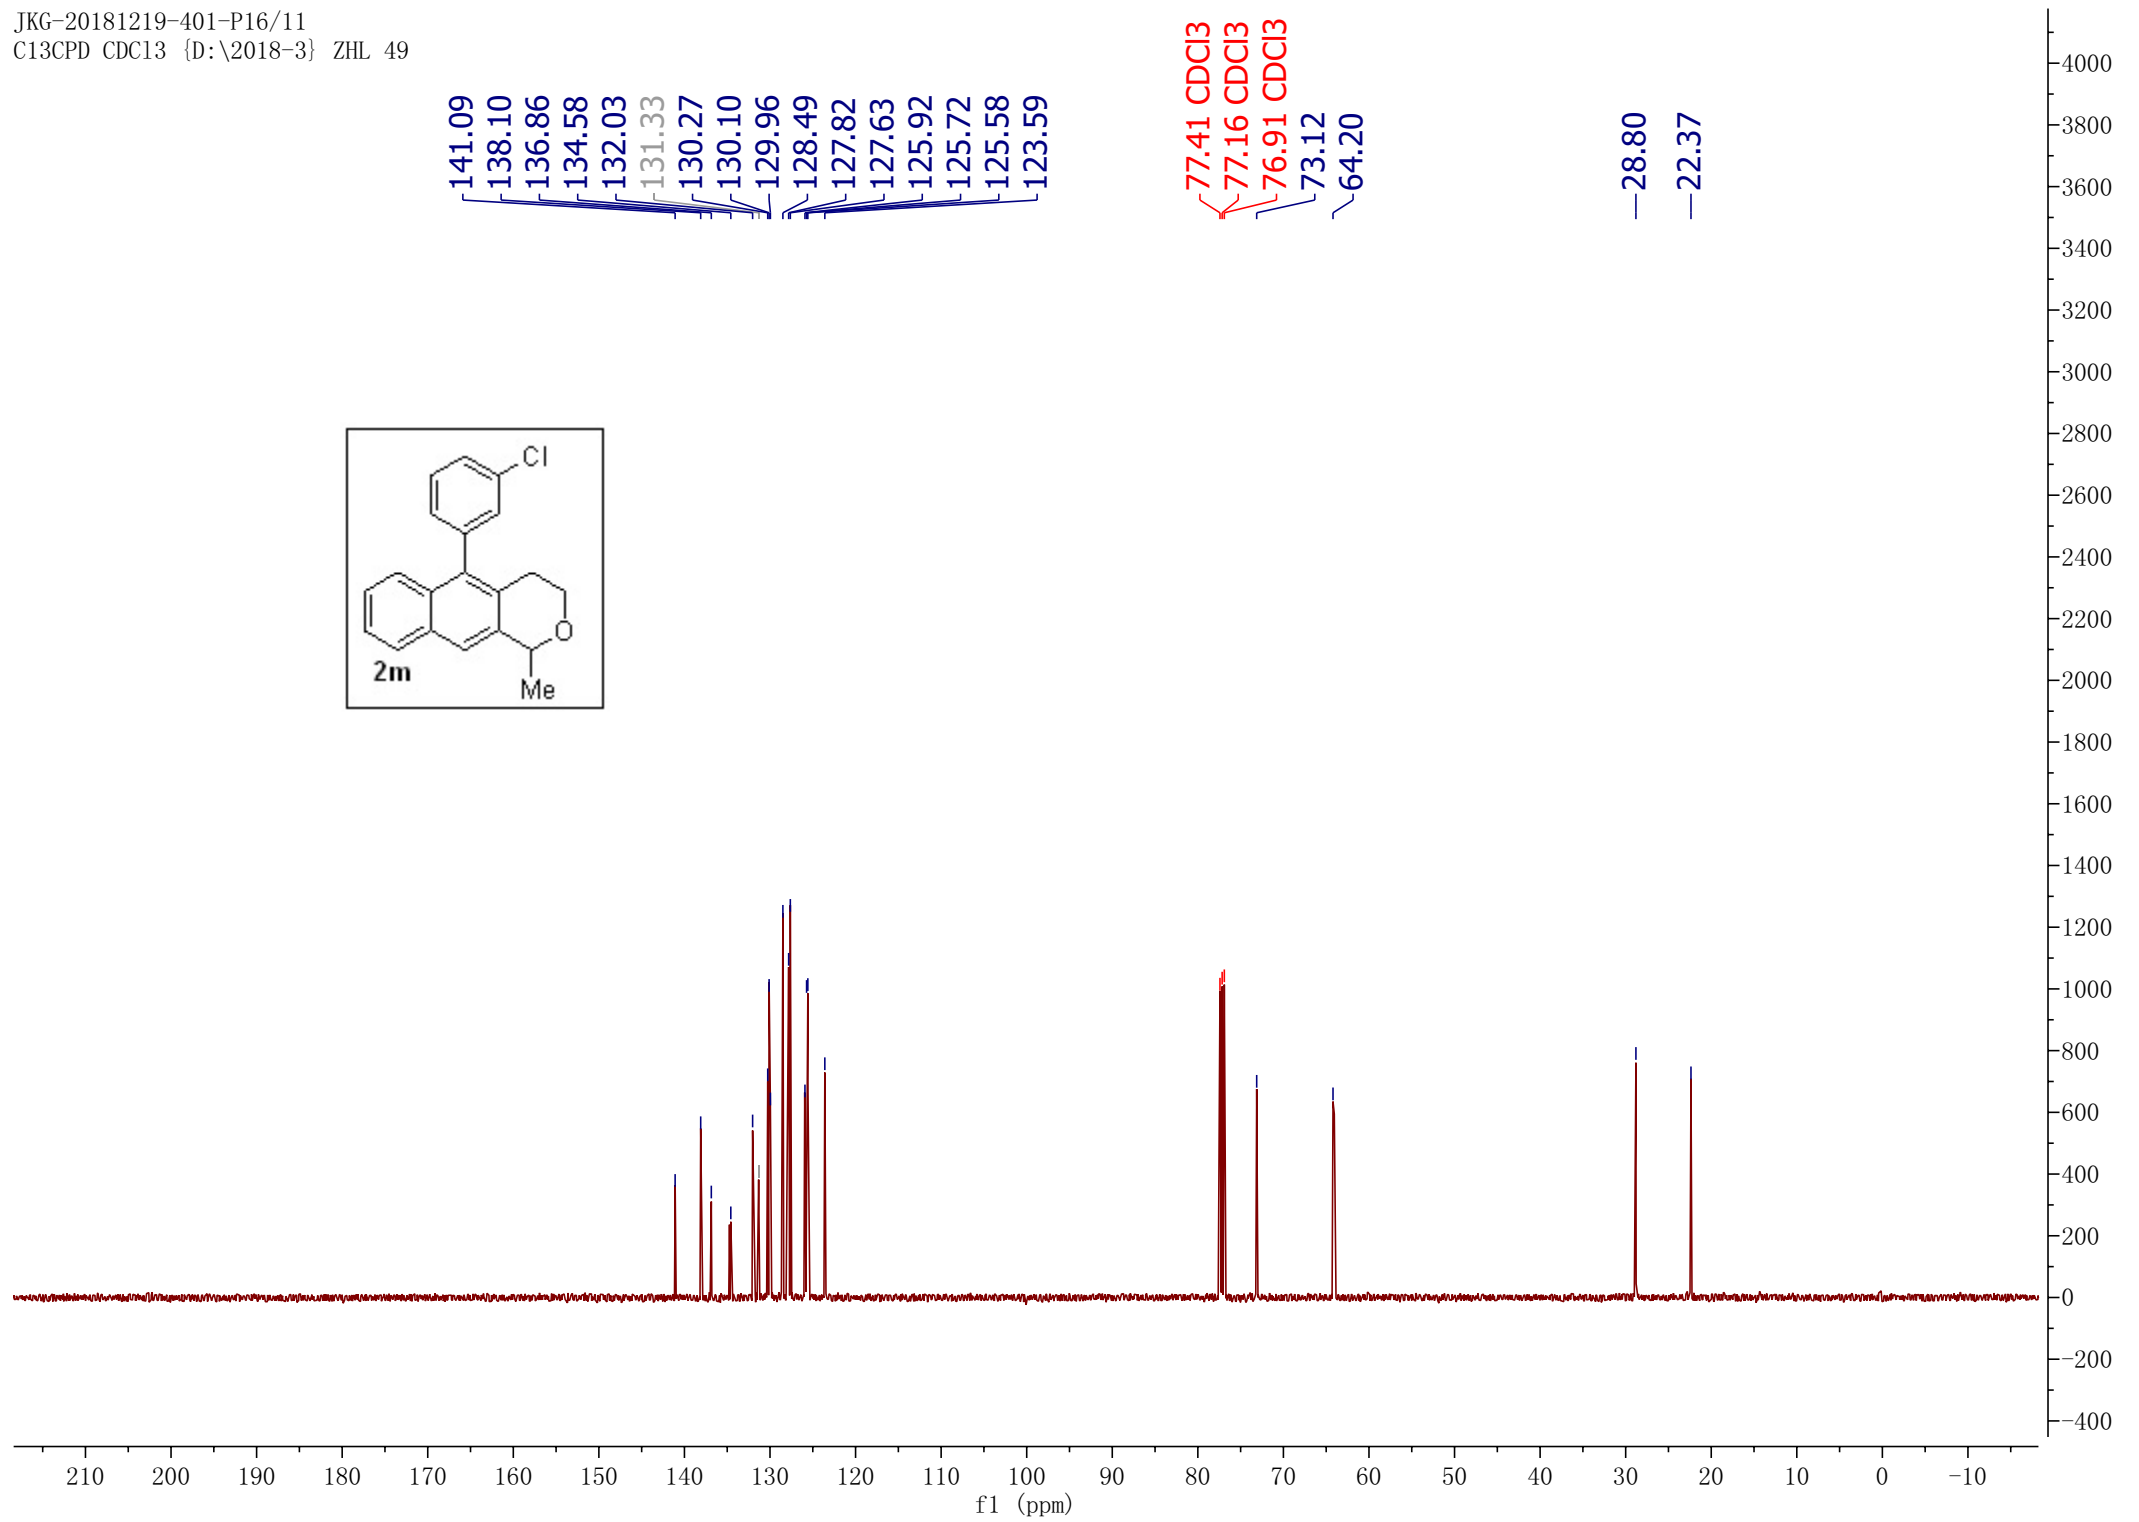

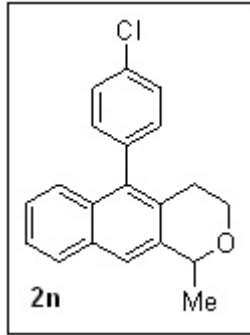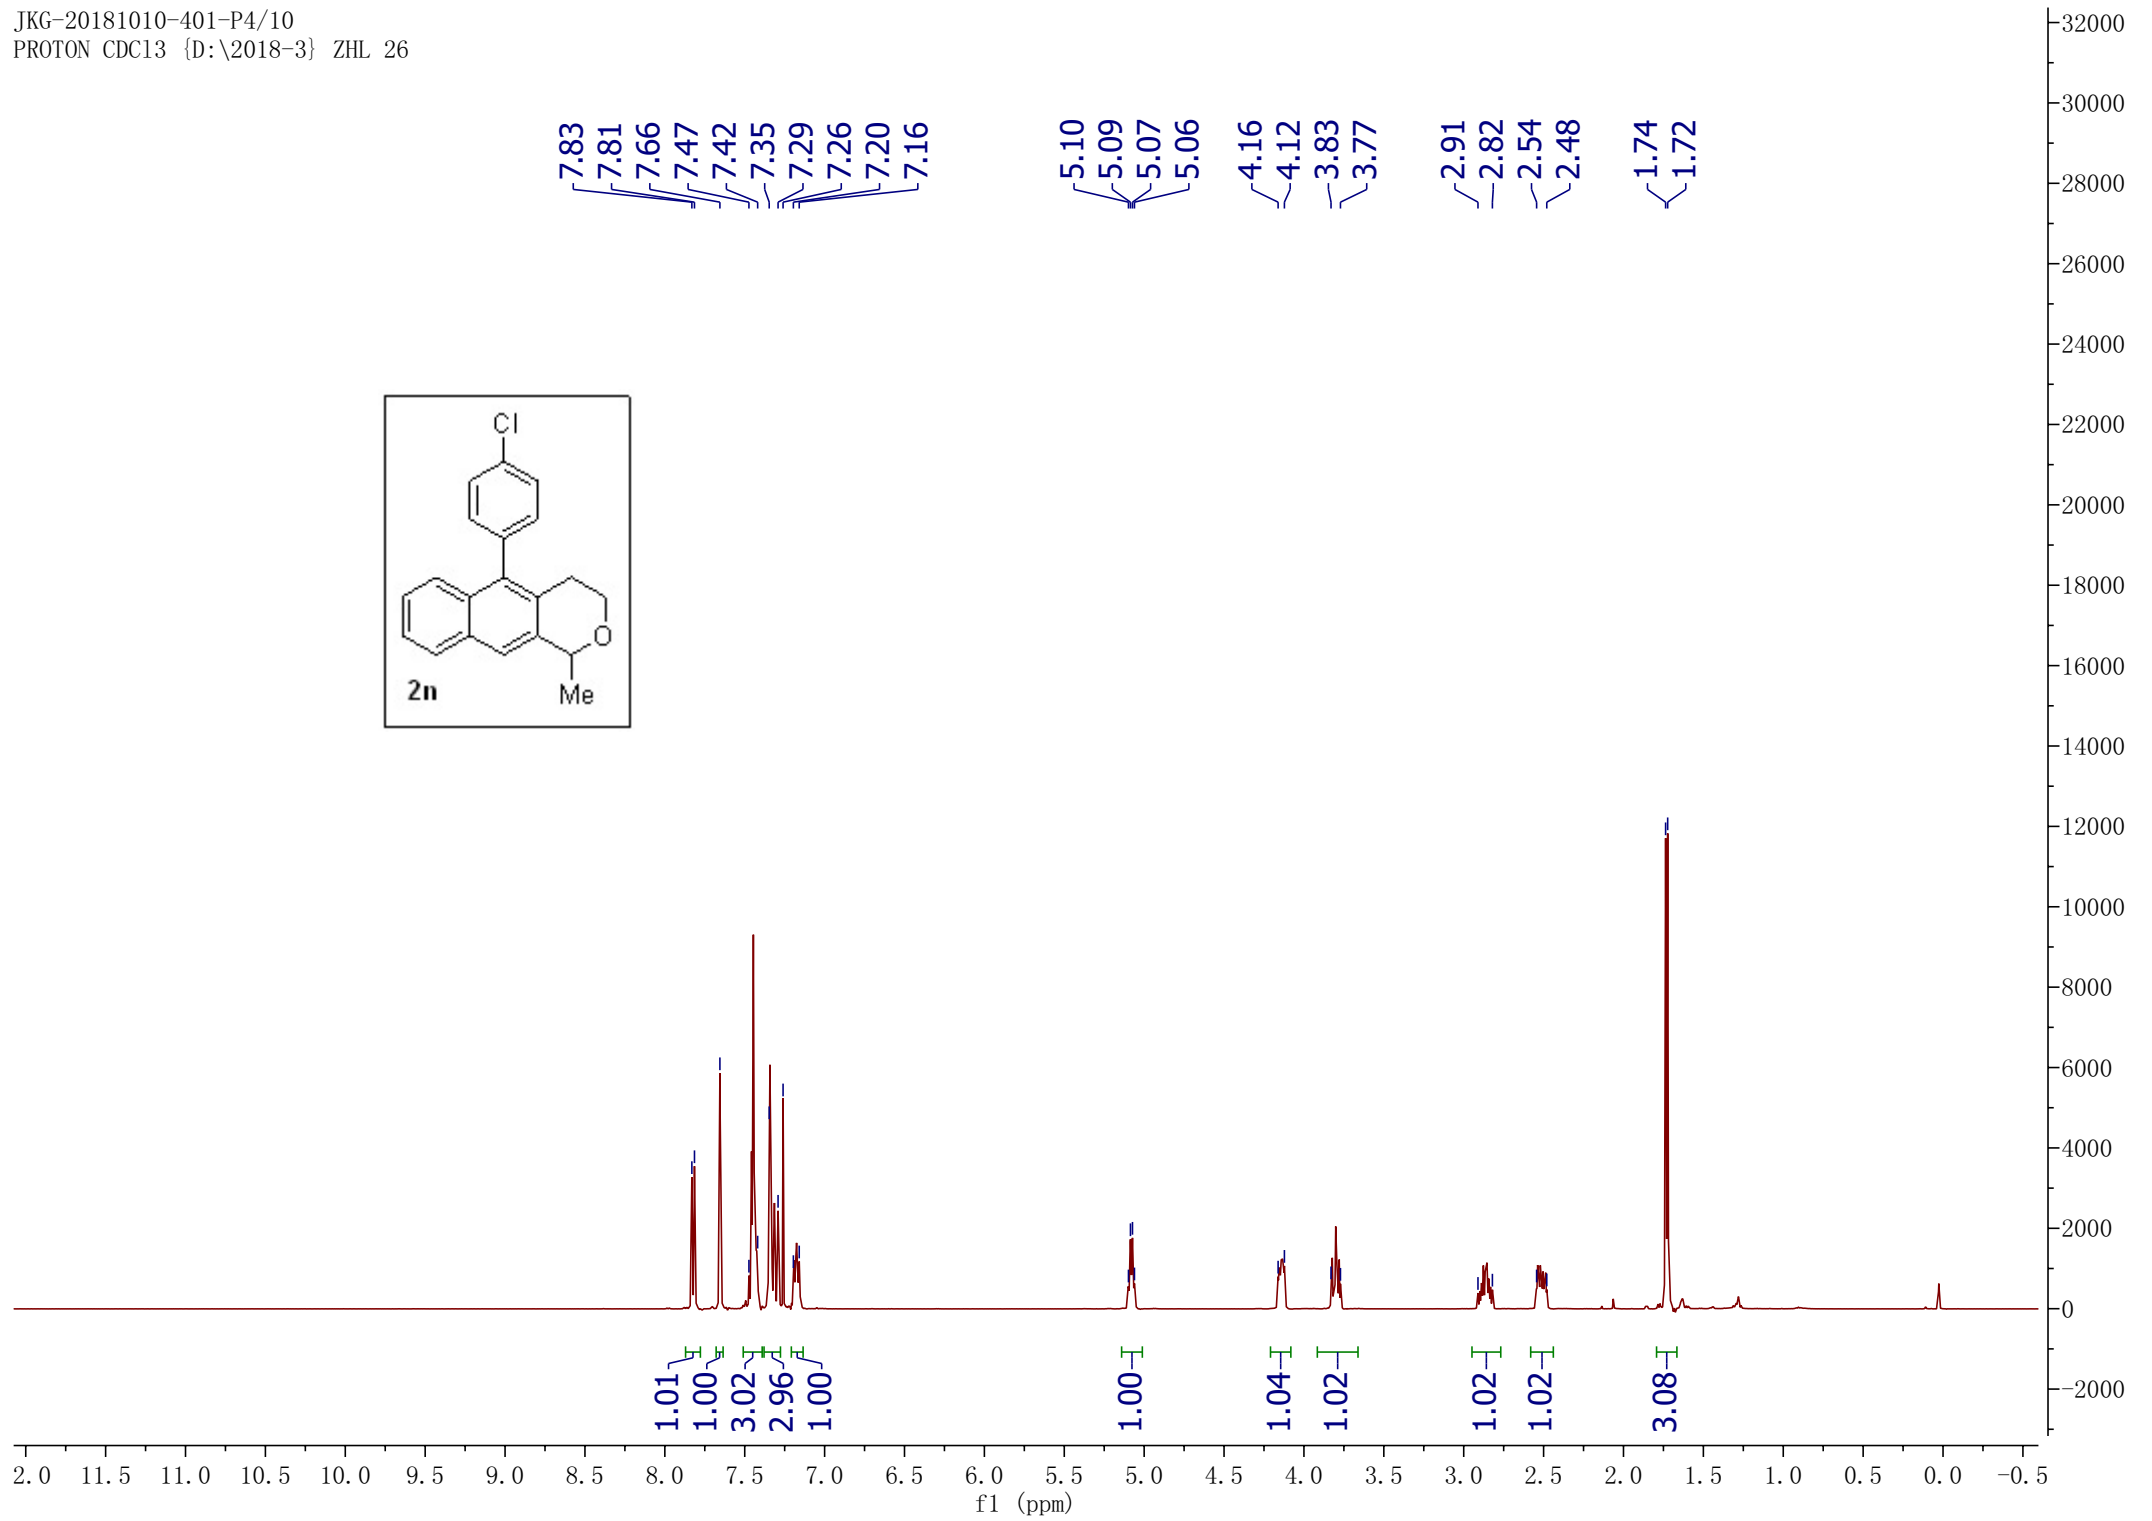

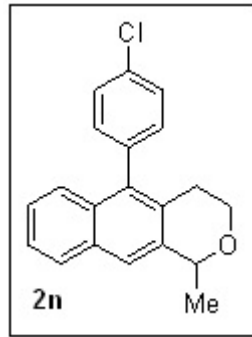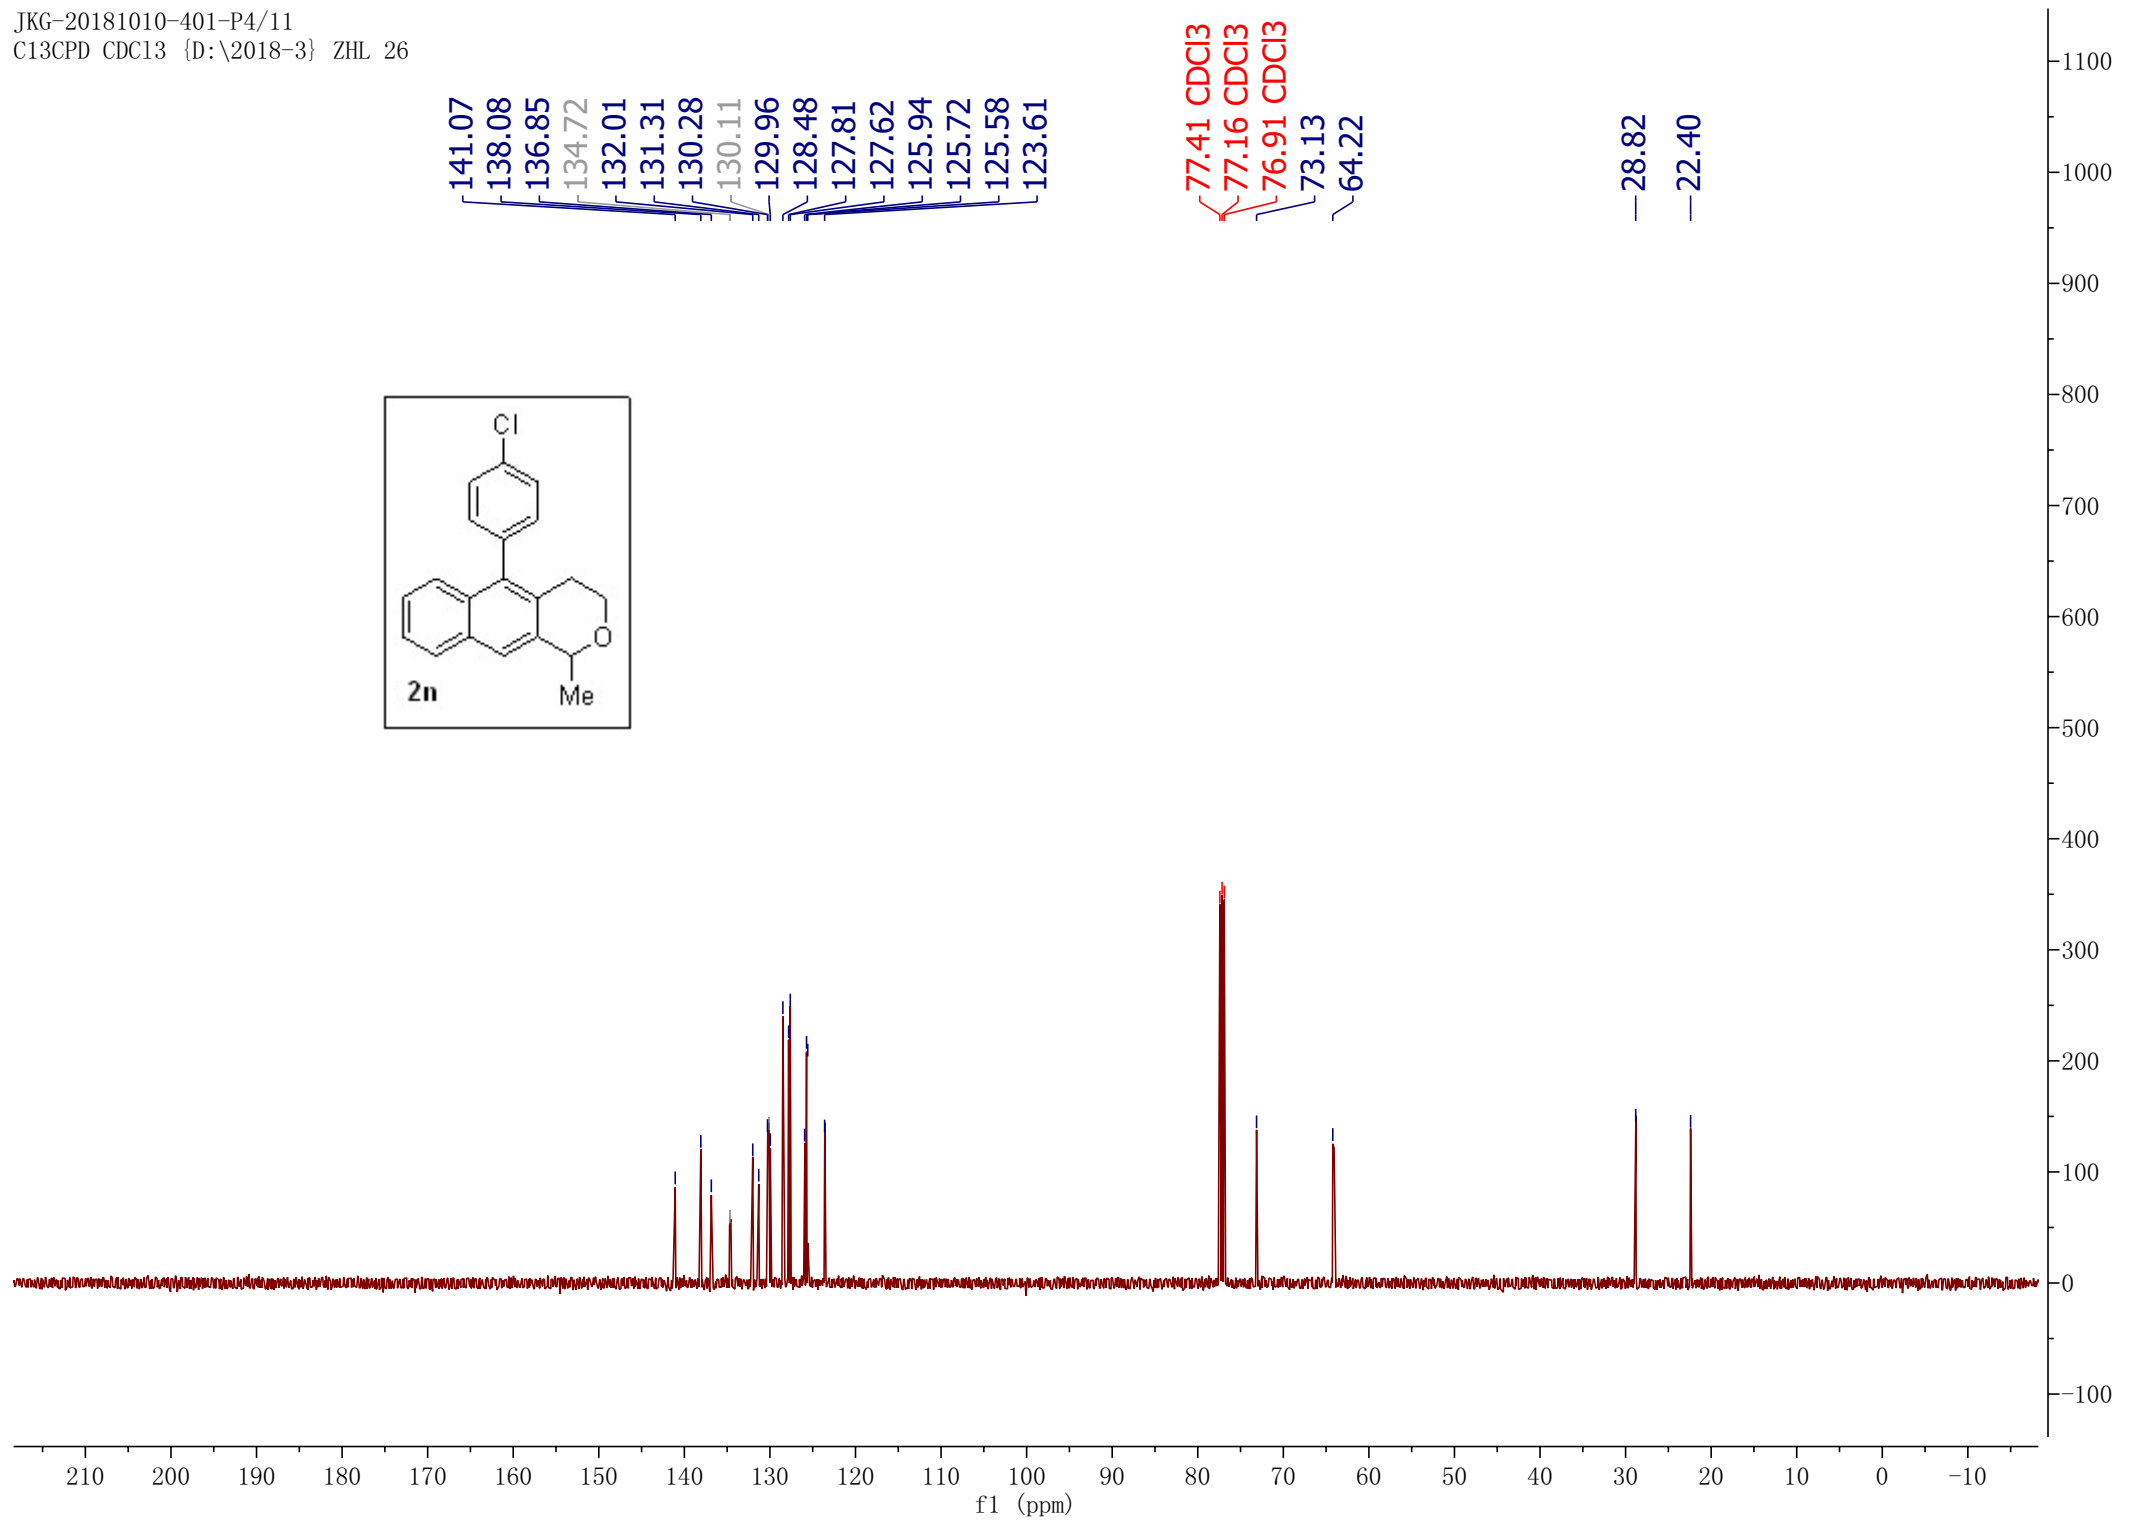

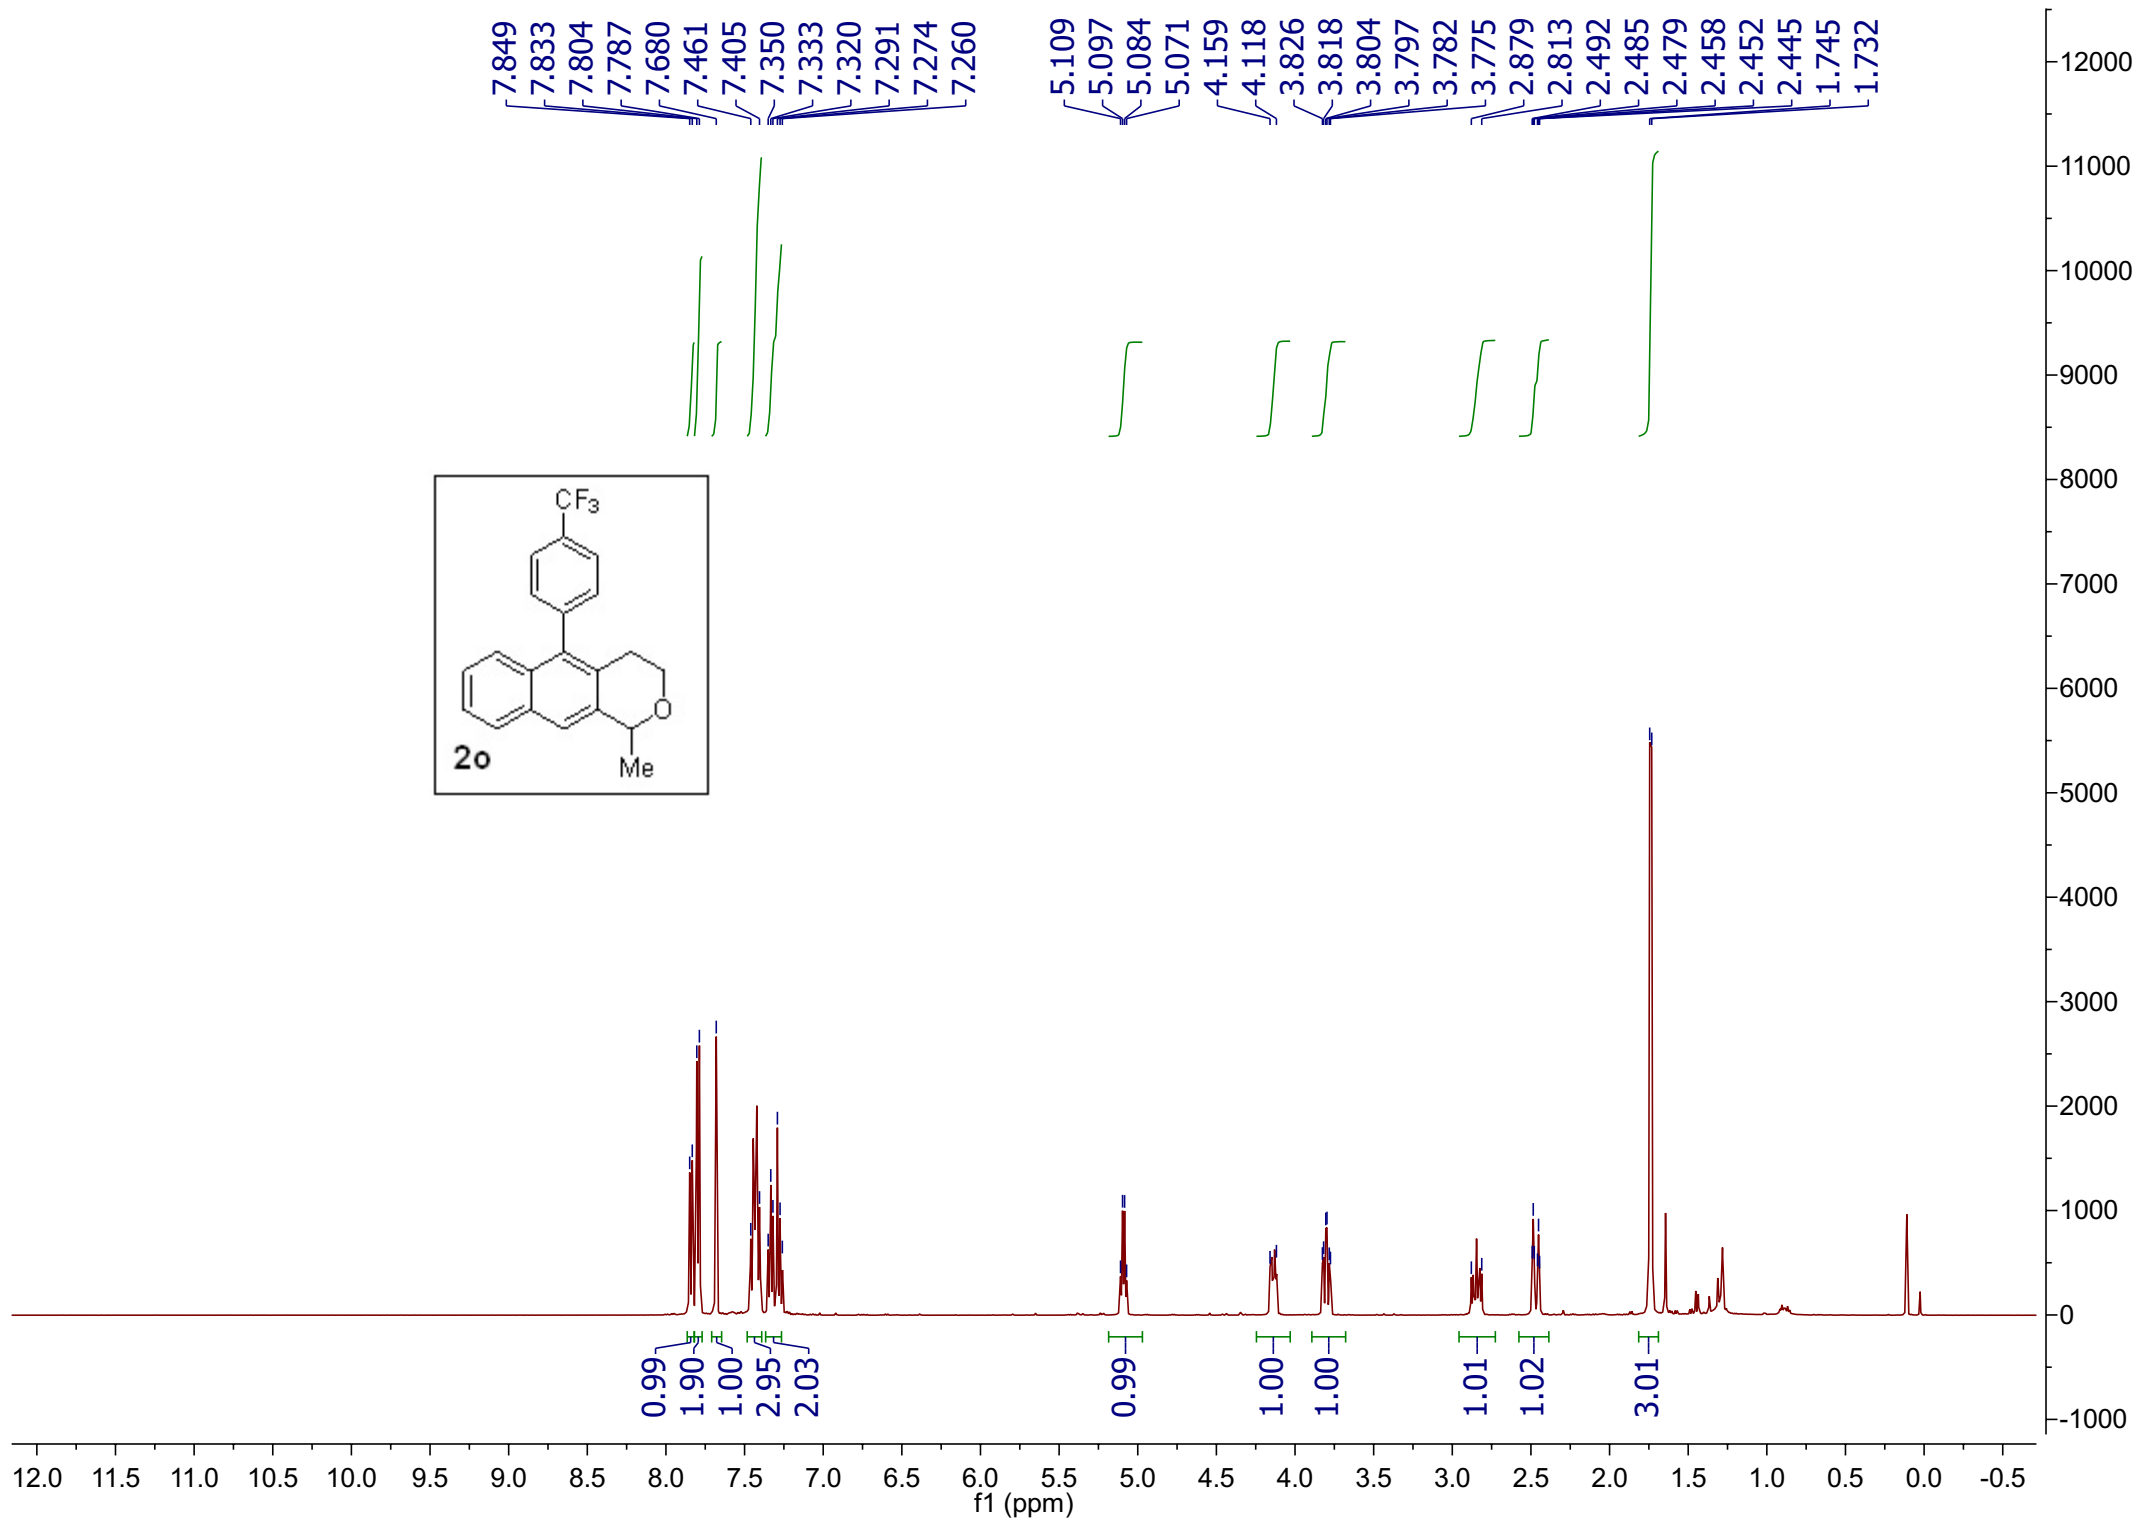

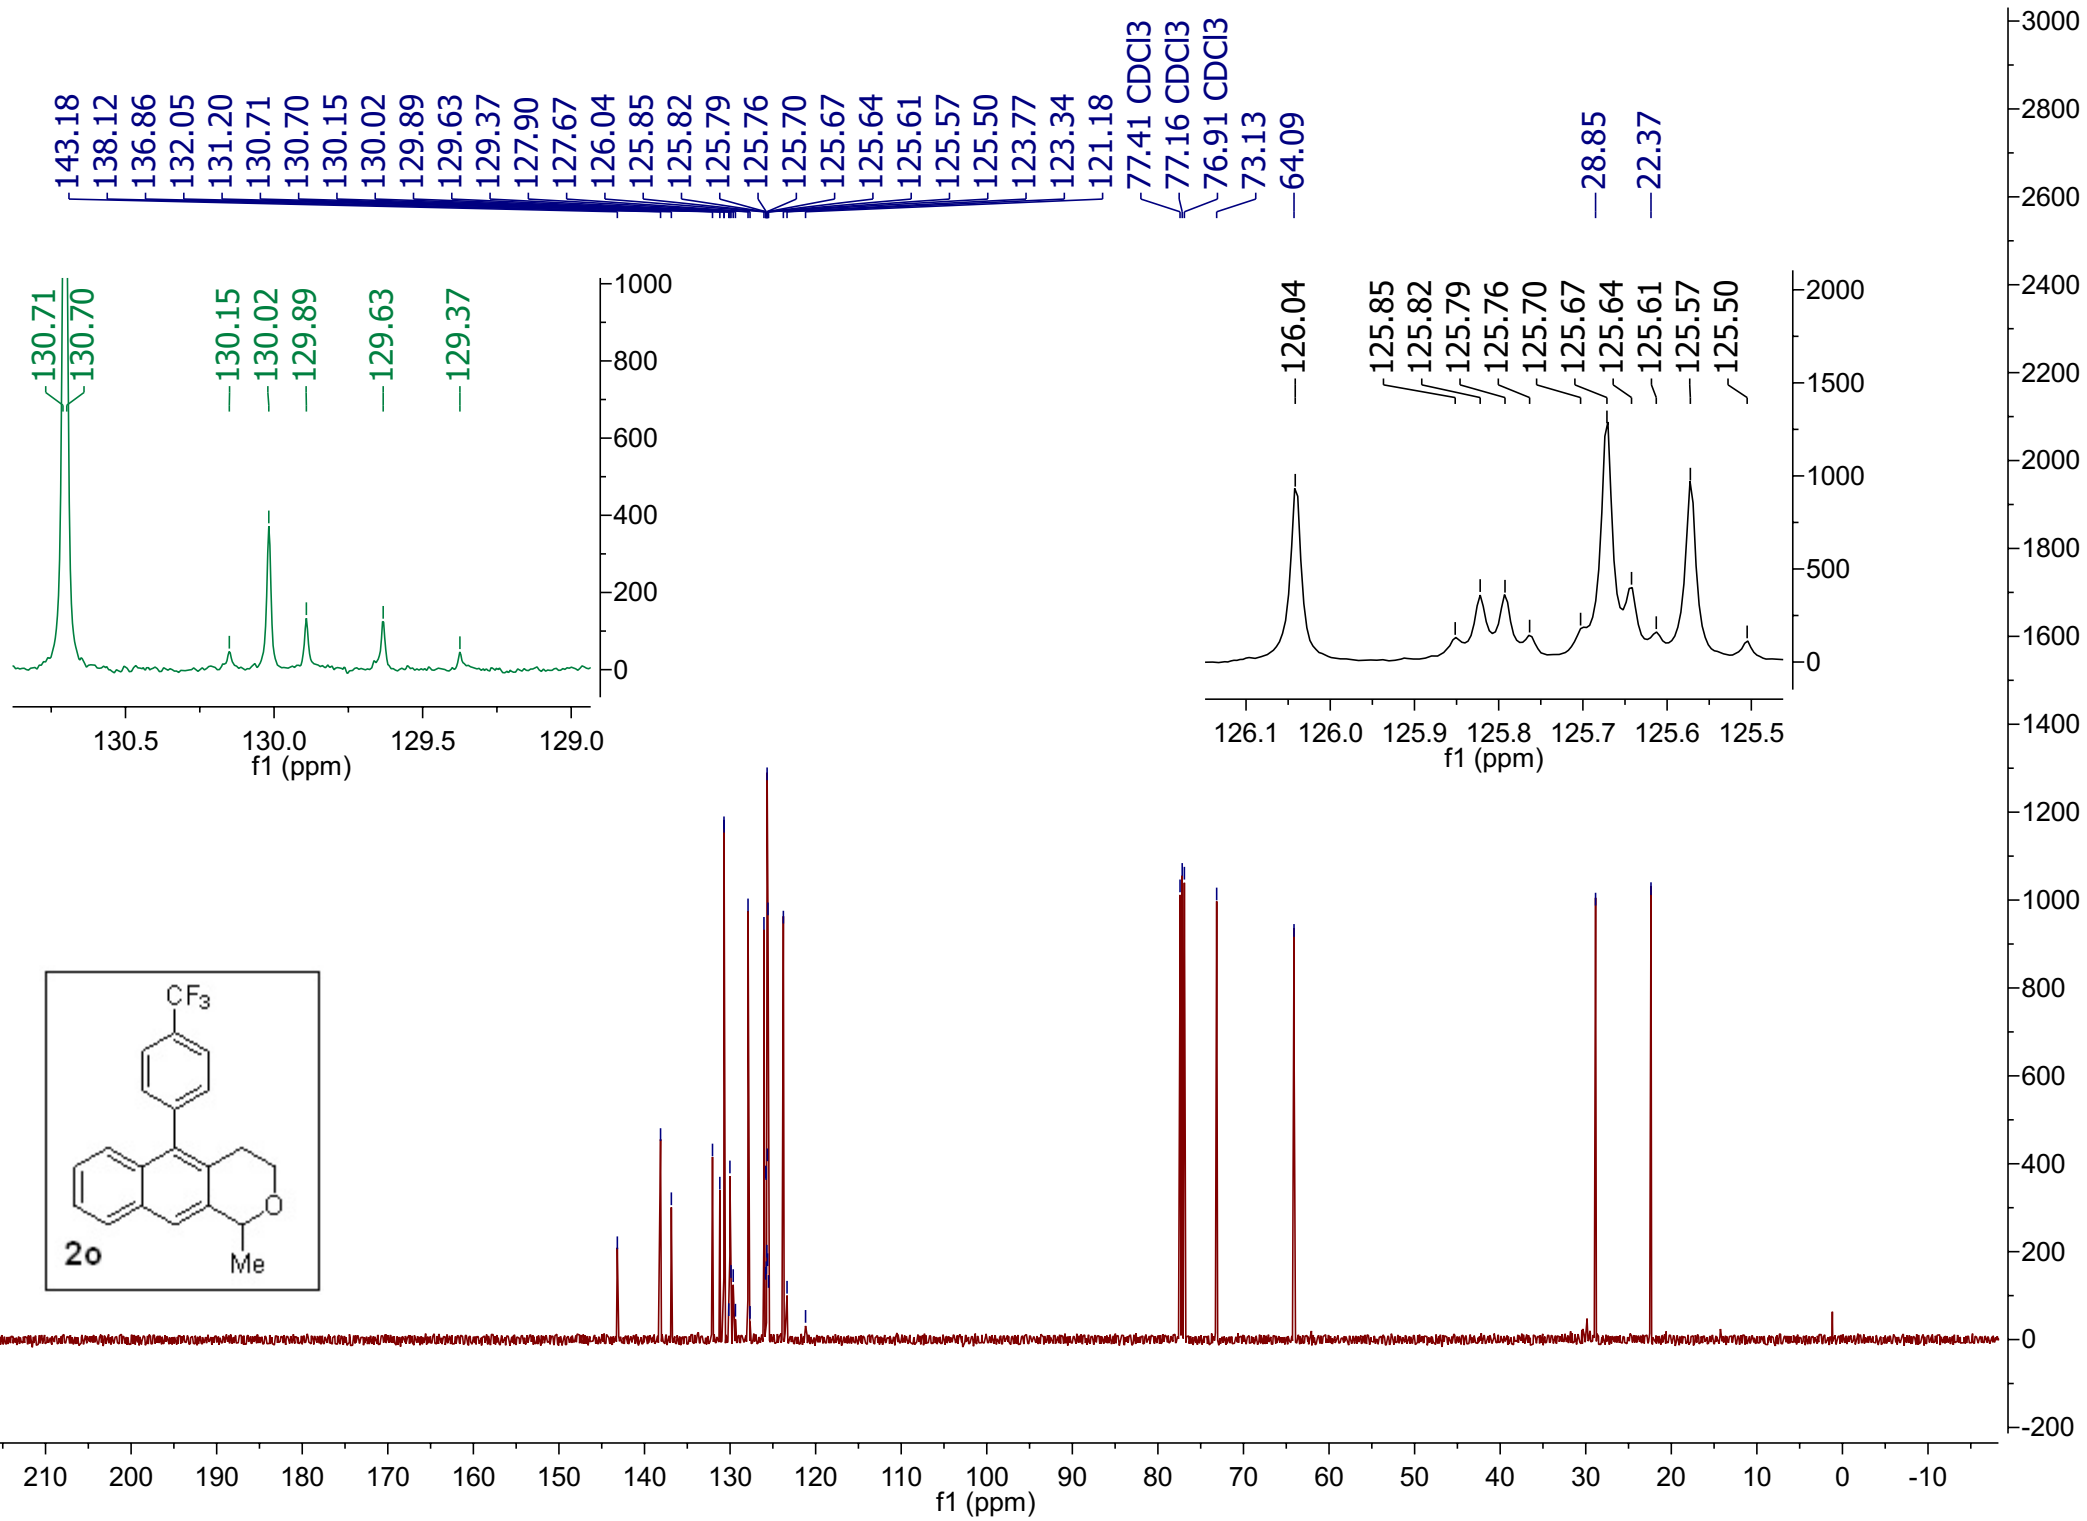

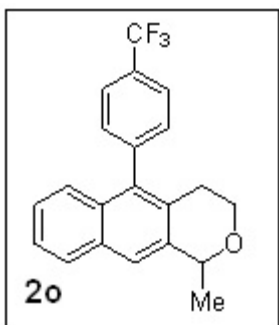

--62.35

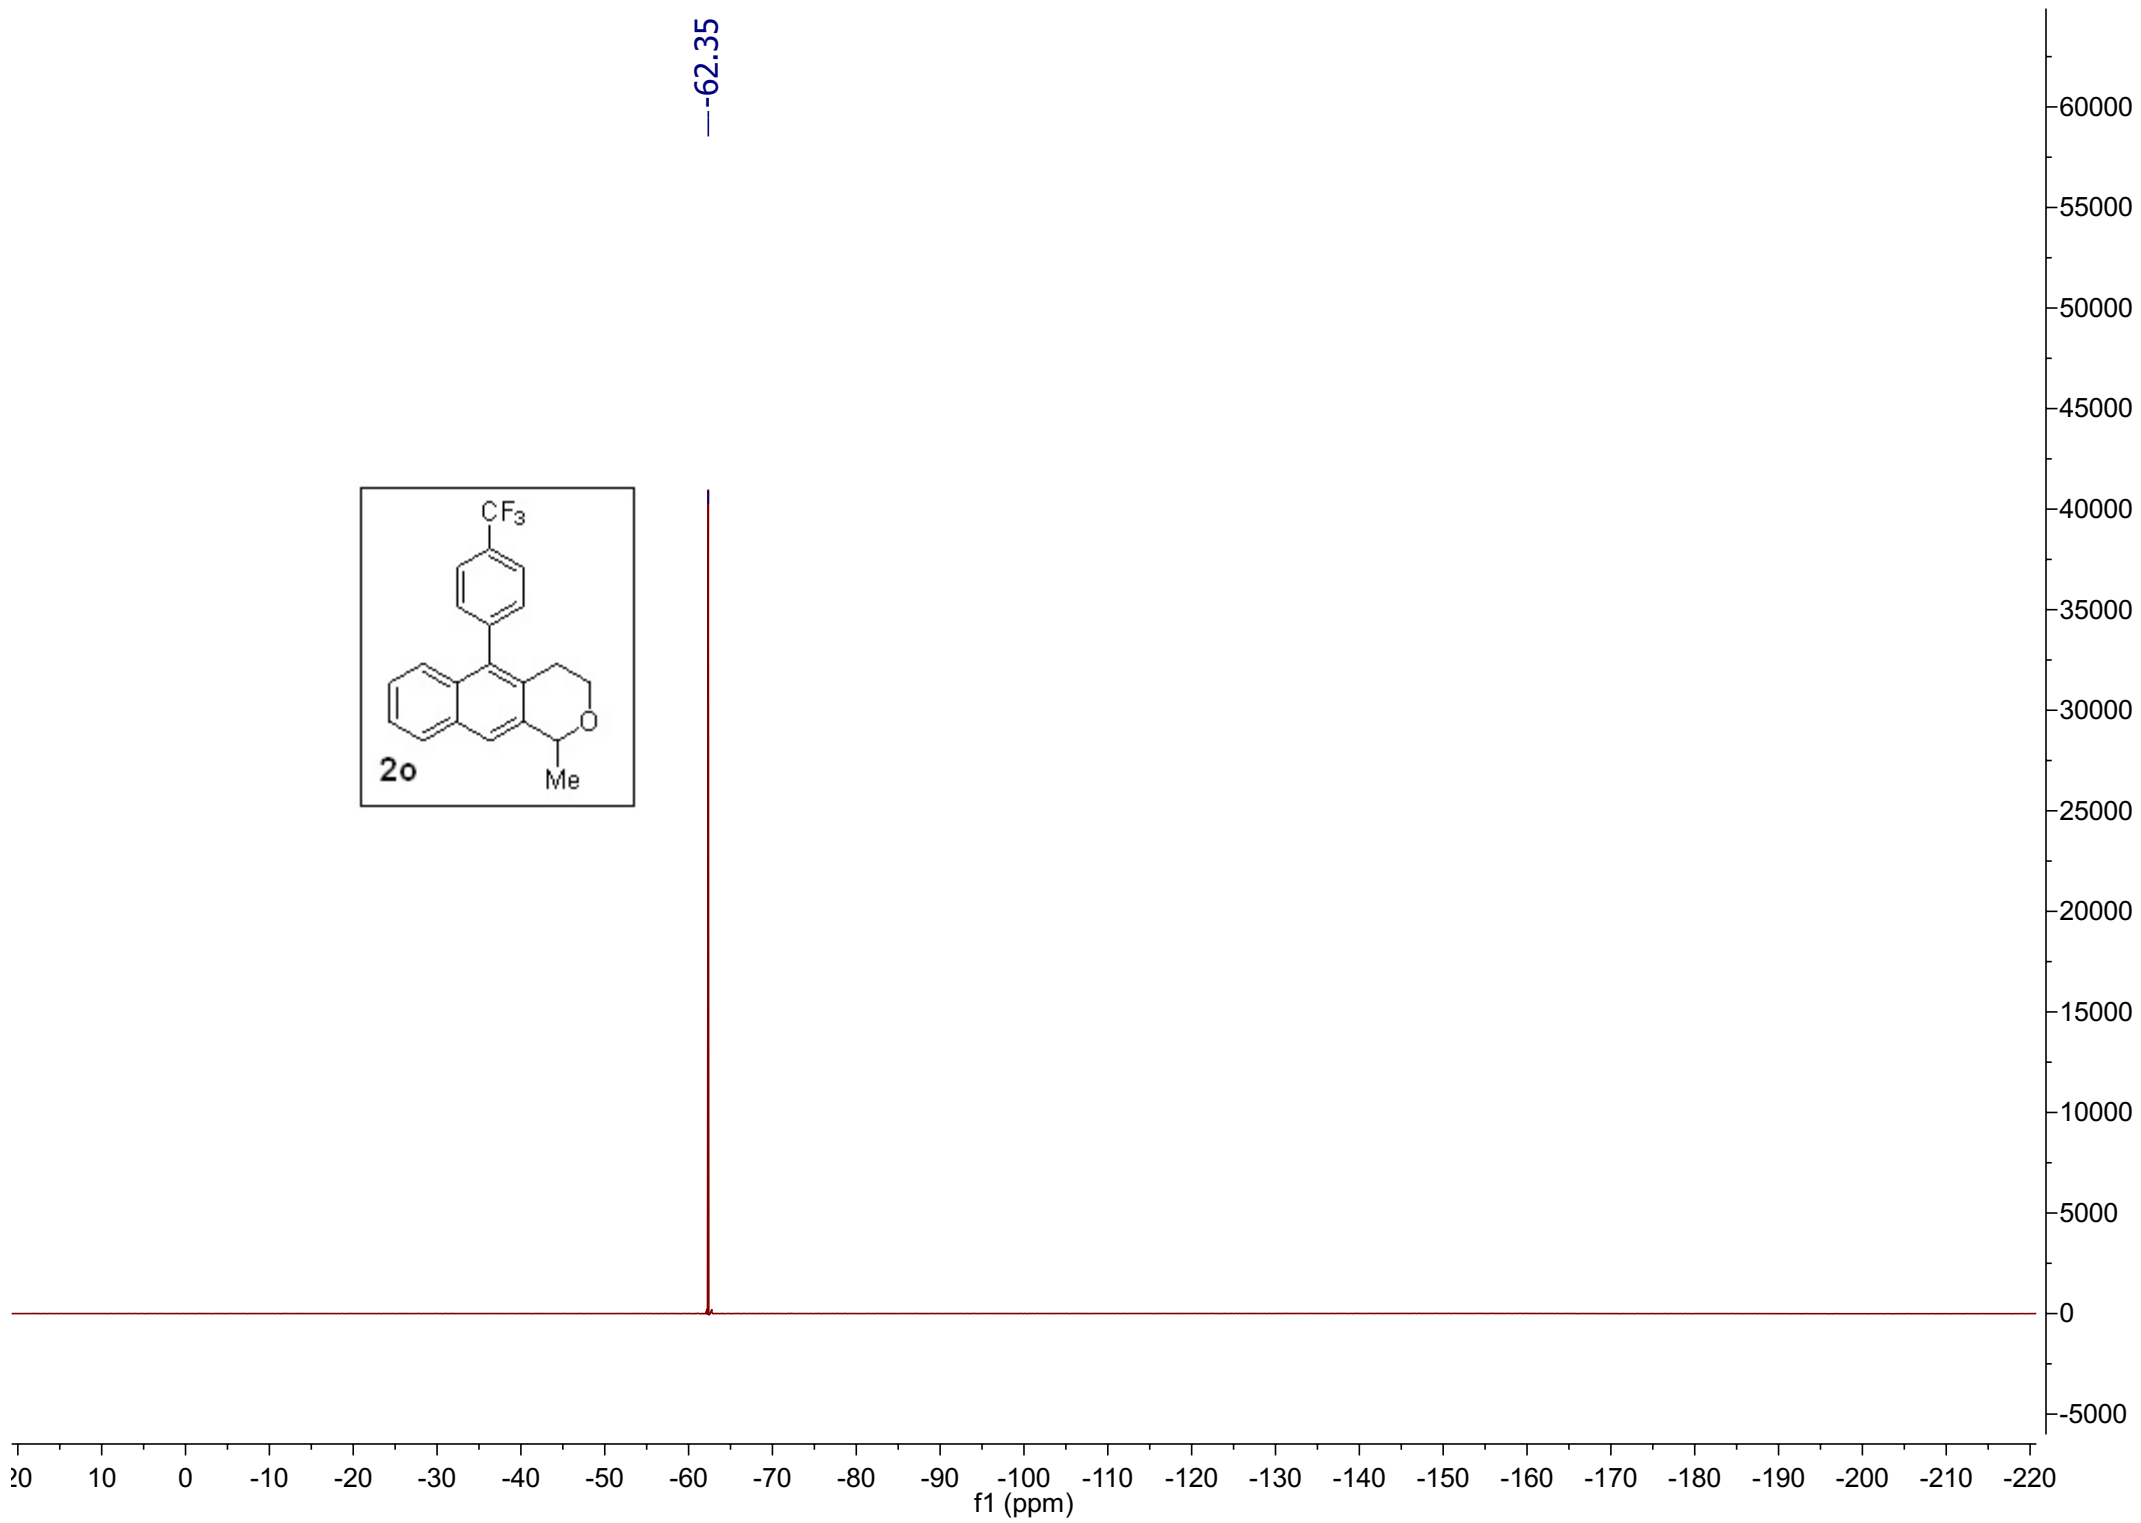



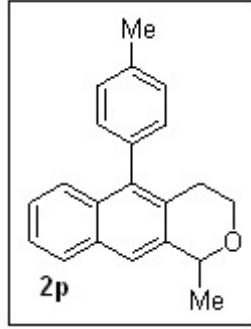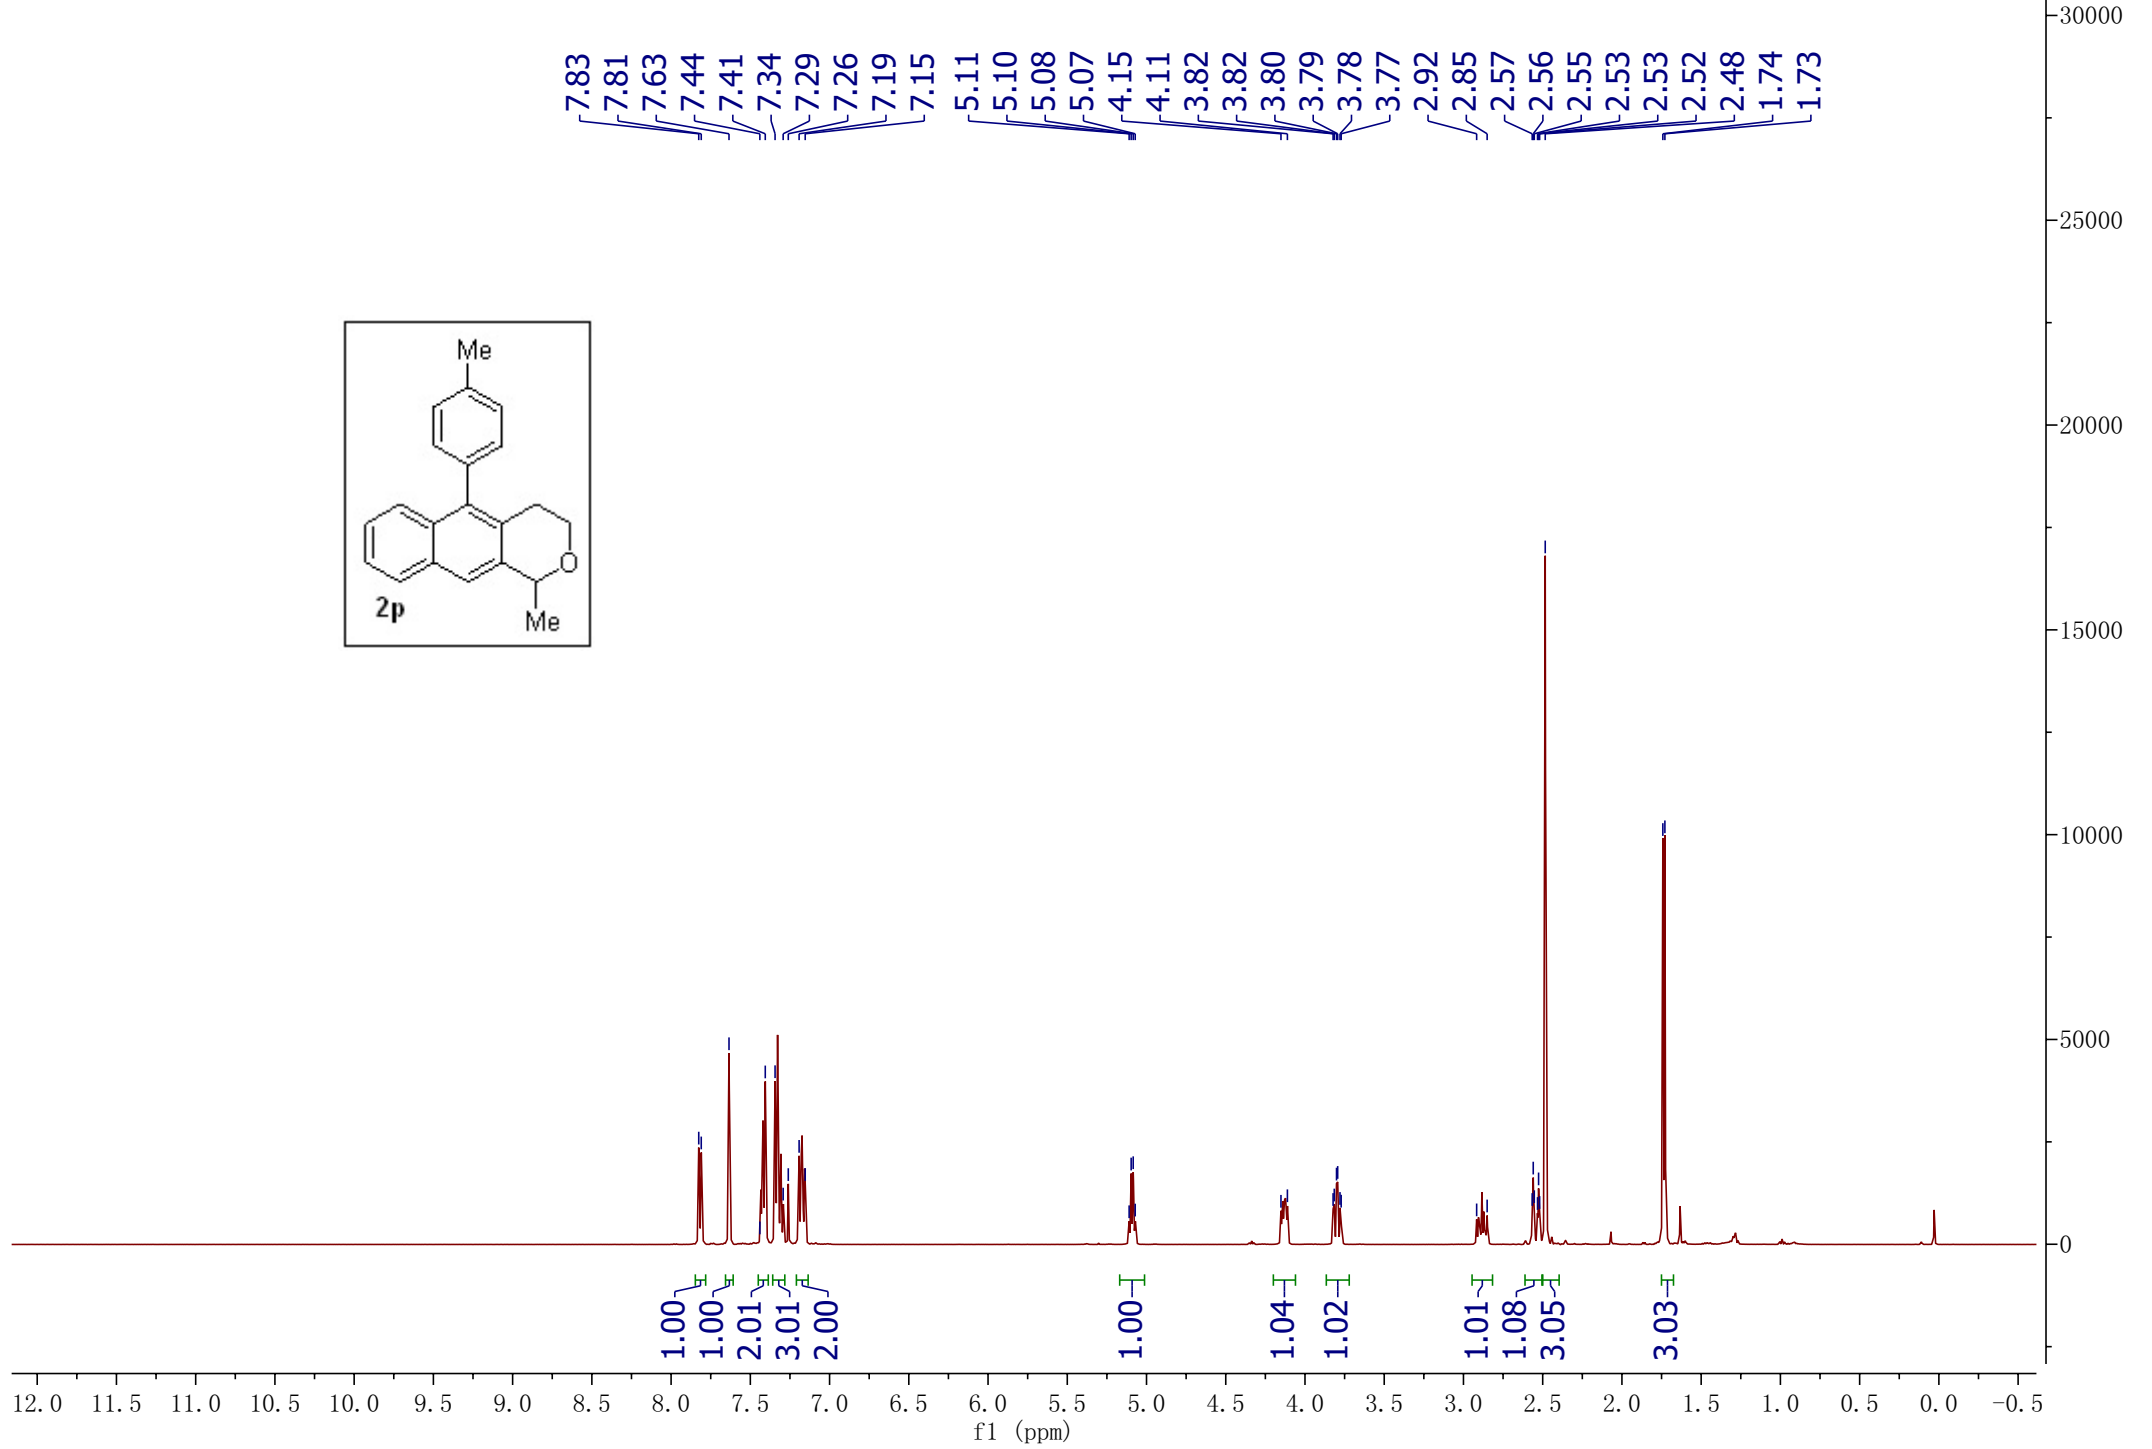

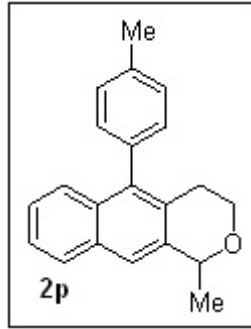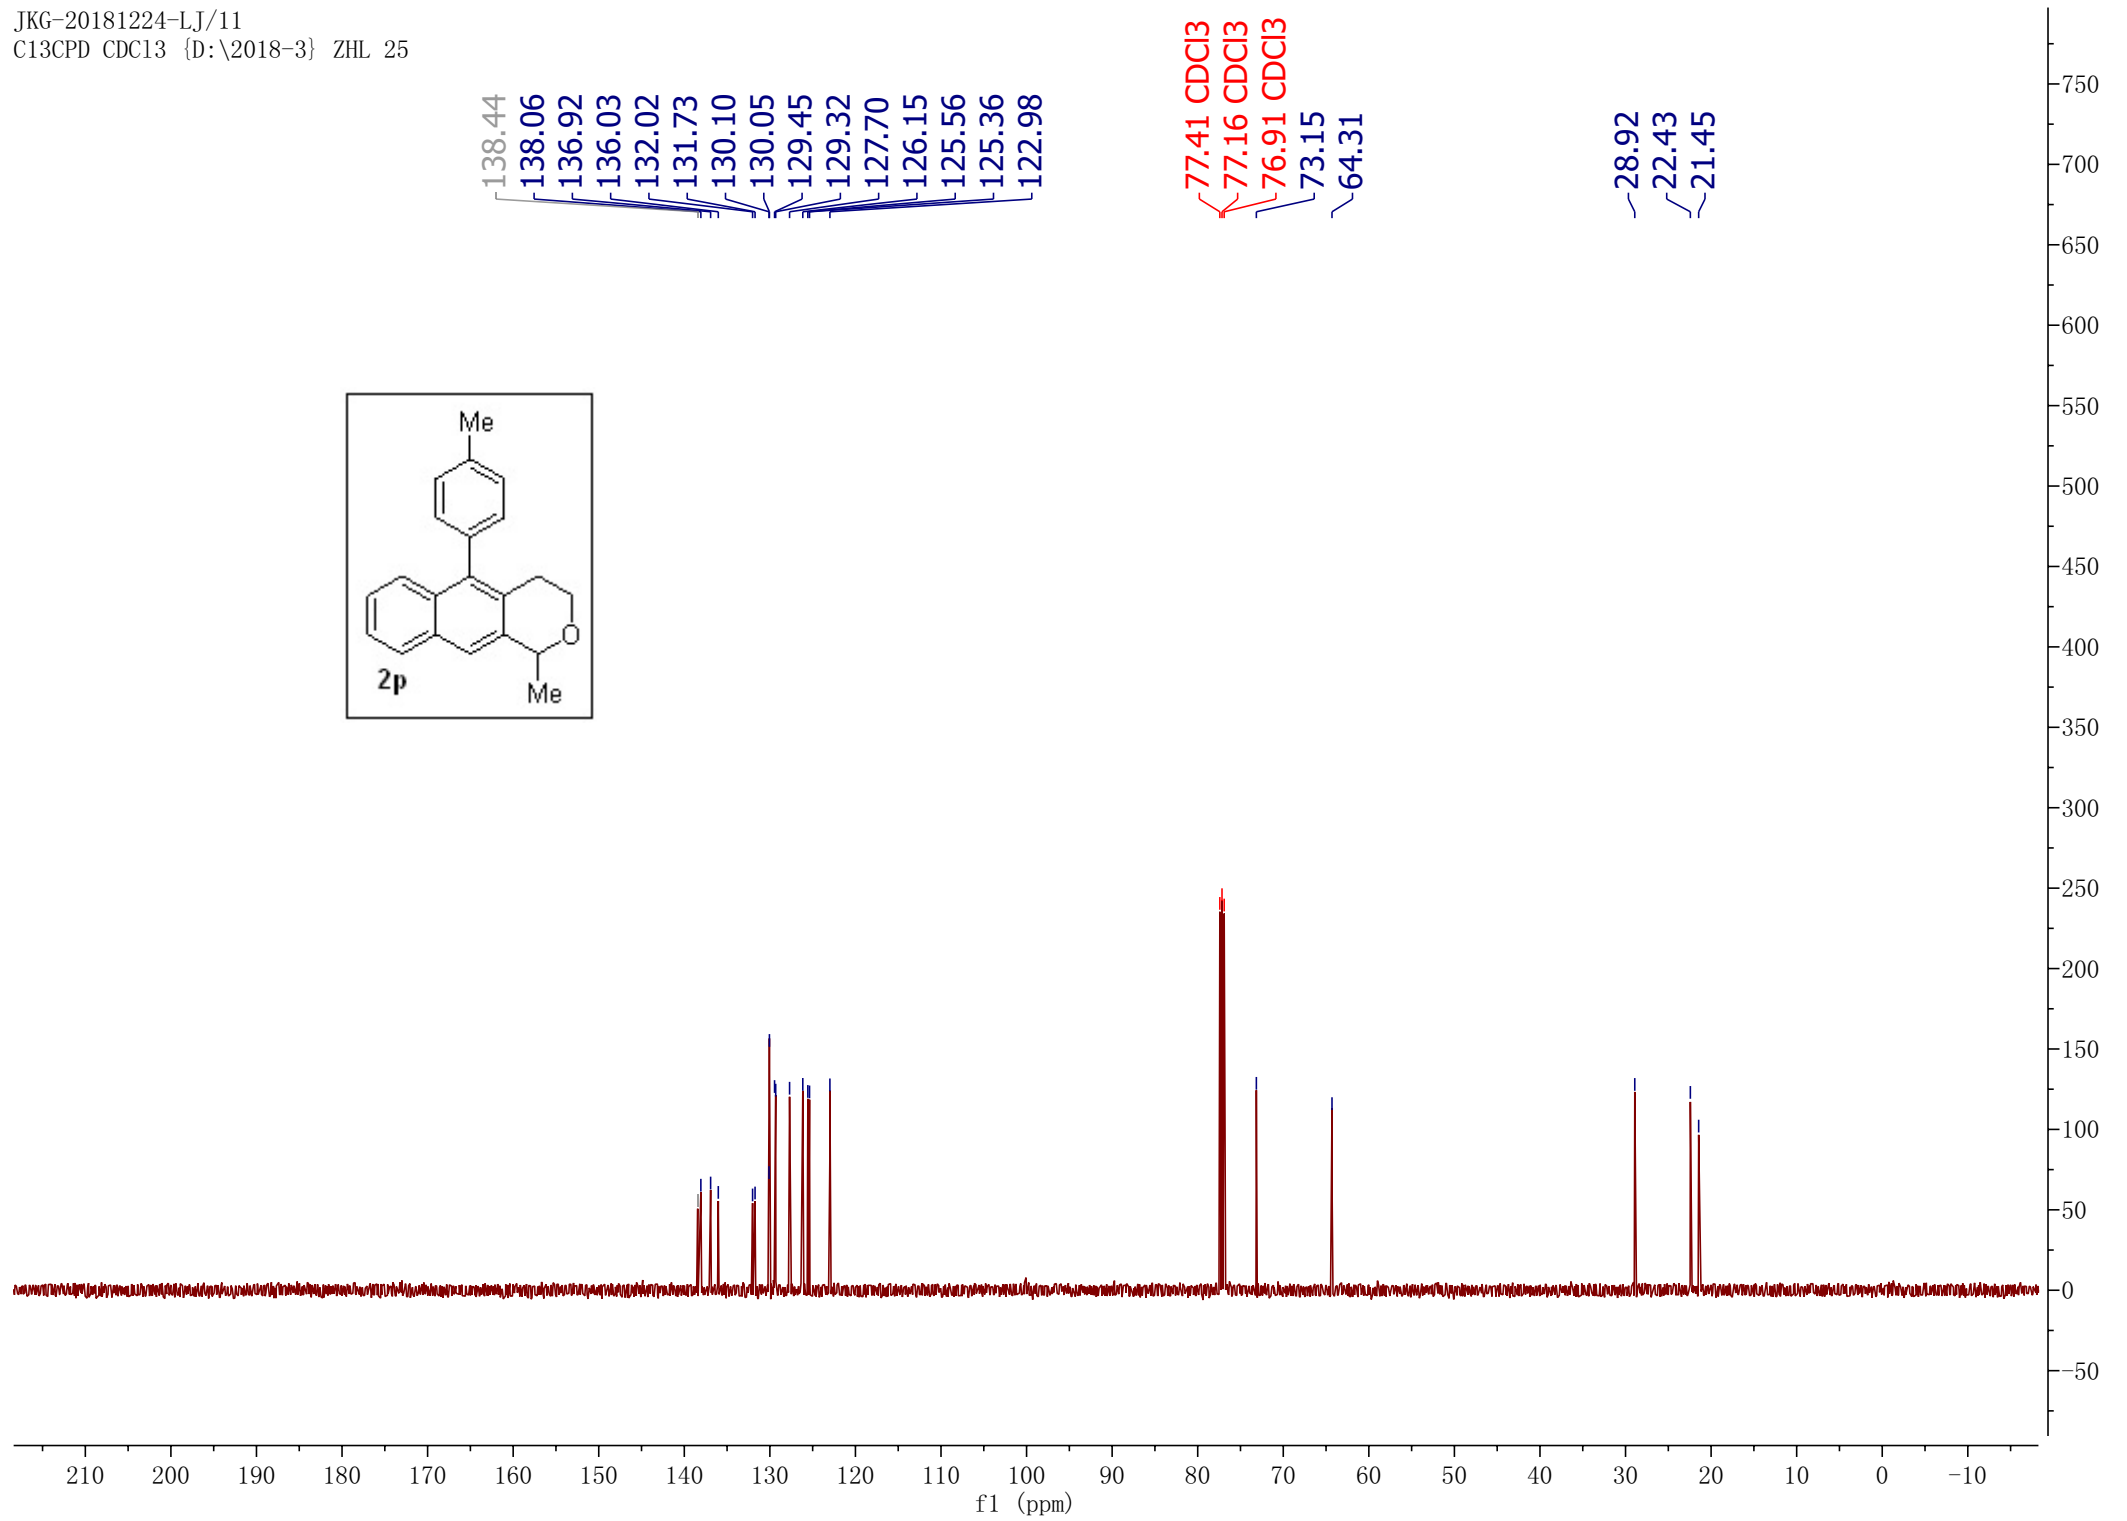

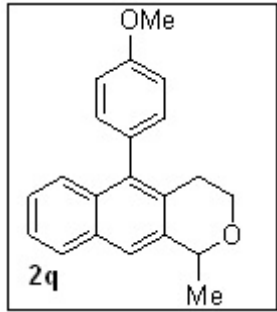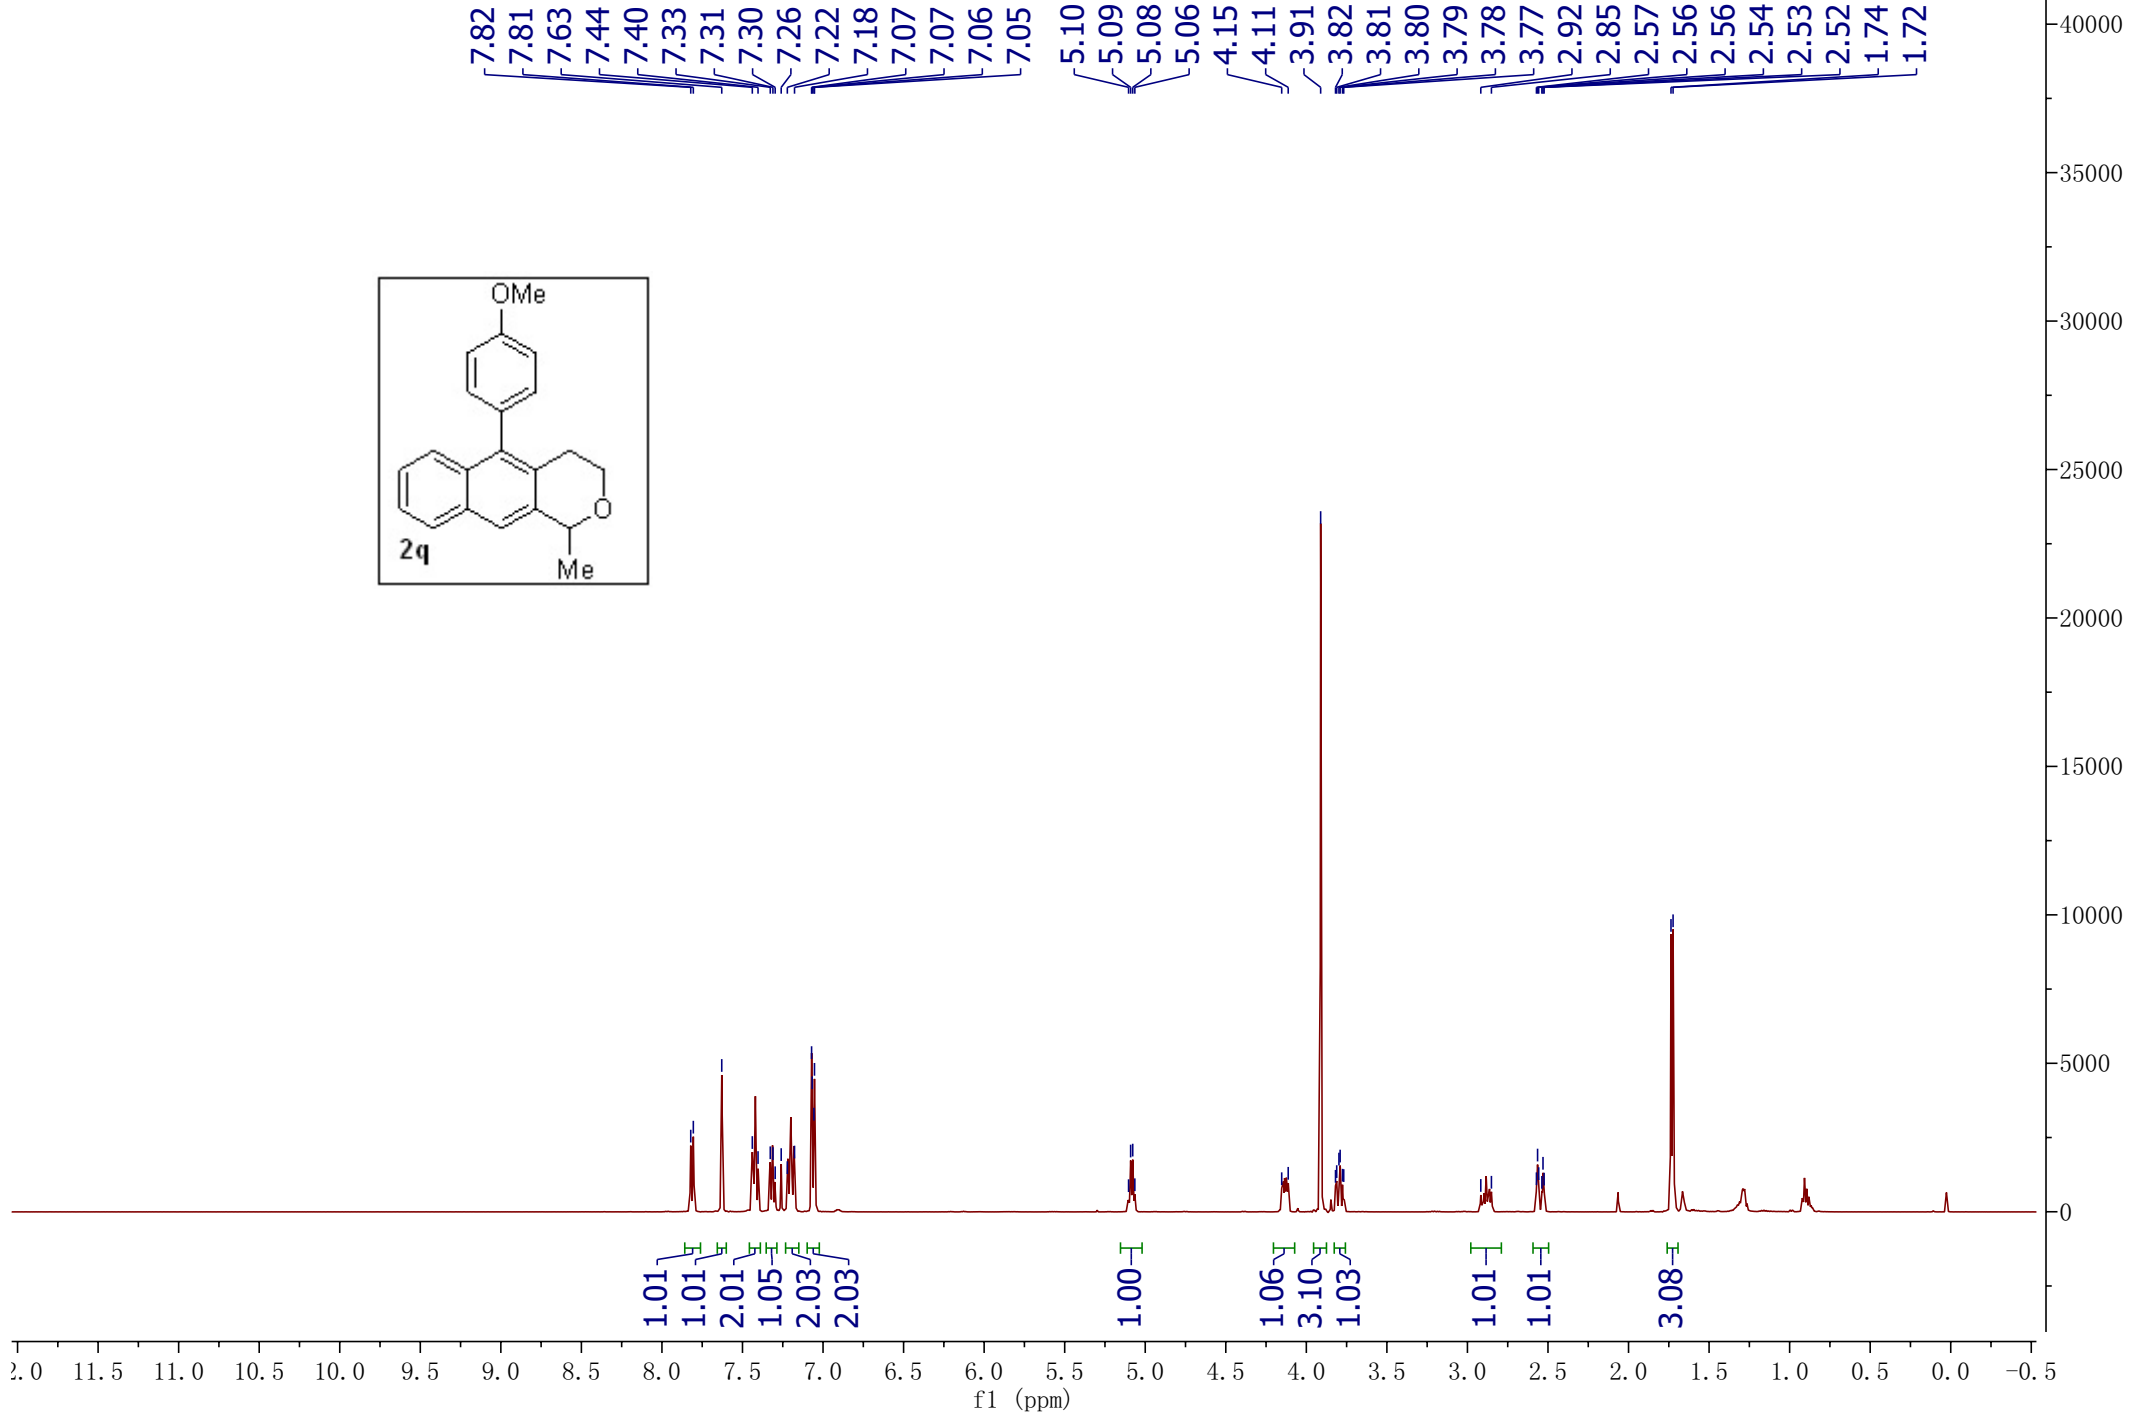

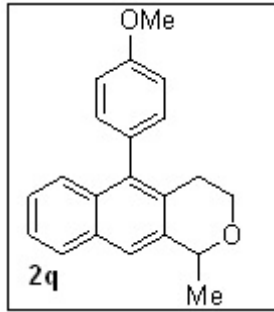

158.88  
138.12  
138.10  
132.05  
131.94  
131.27  
131.24  
131.18  
130.40  
127.71  
126.14  
125.58  
125.36  
123.00  
114.13  
114.08

77.41 CDC13  
77.16 CDC13  
76.91 CDC13  
73.13  
64.31  
55.42

28.96  
22.43

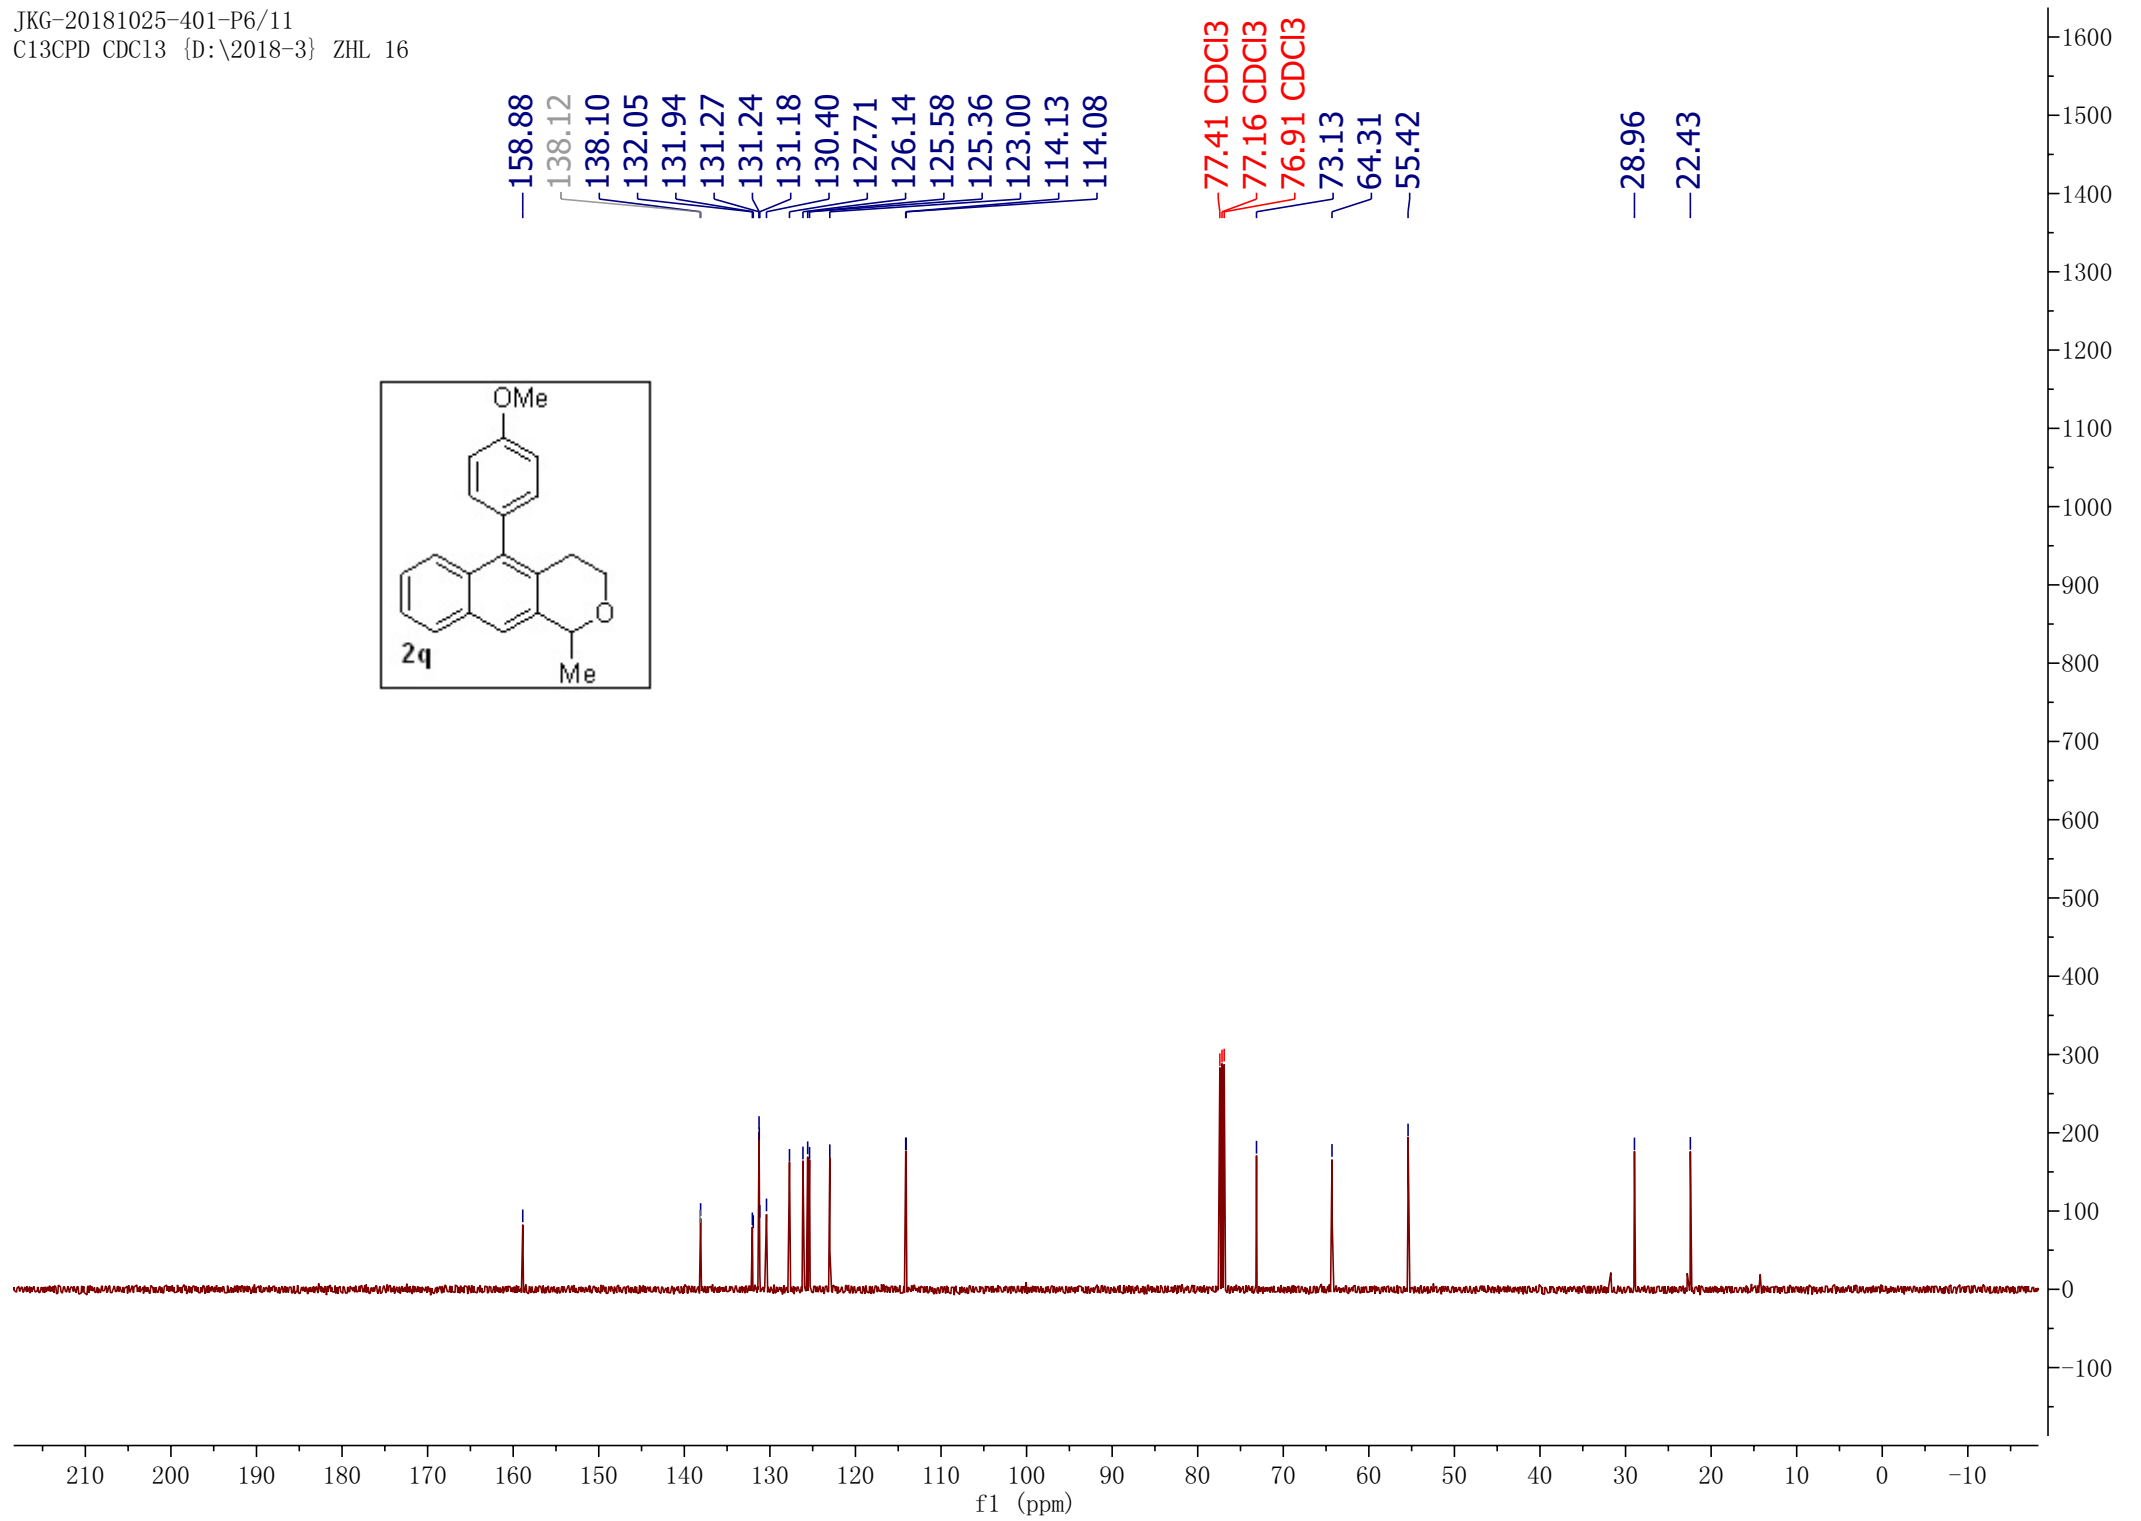

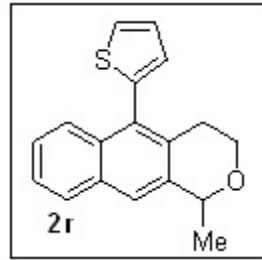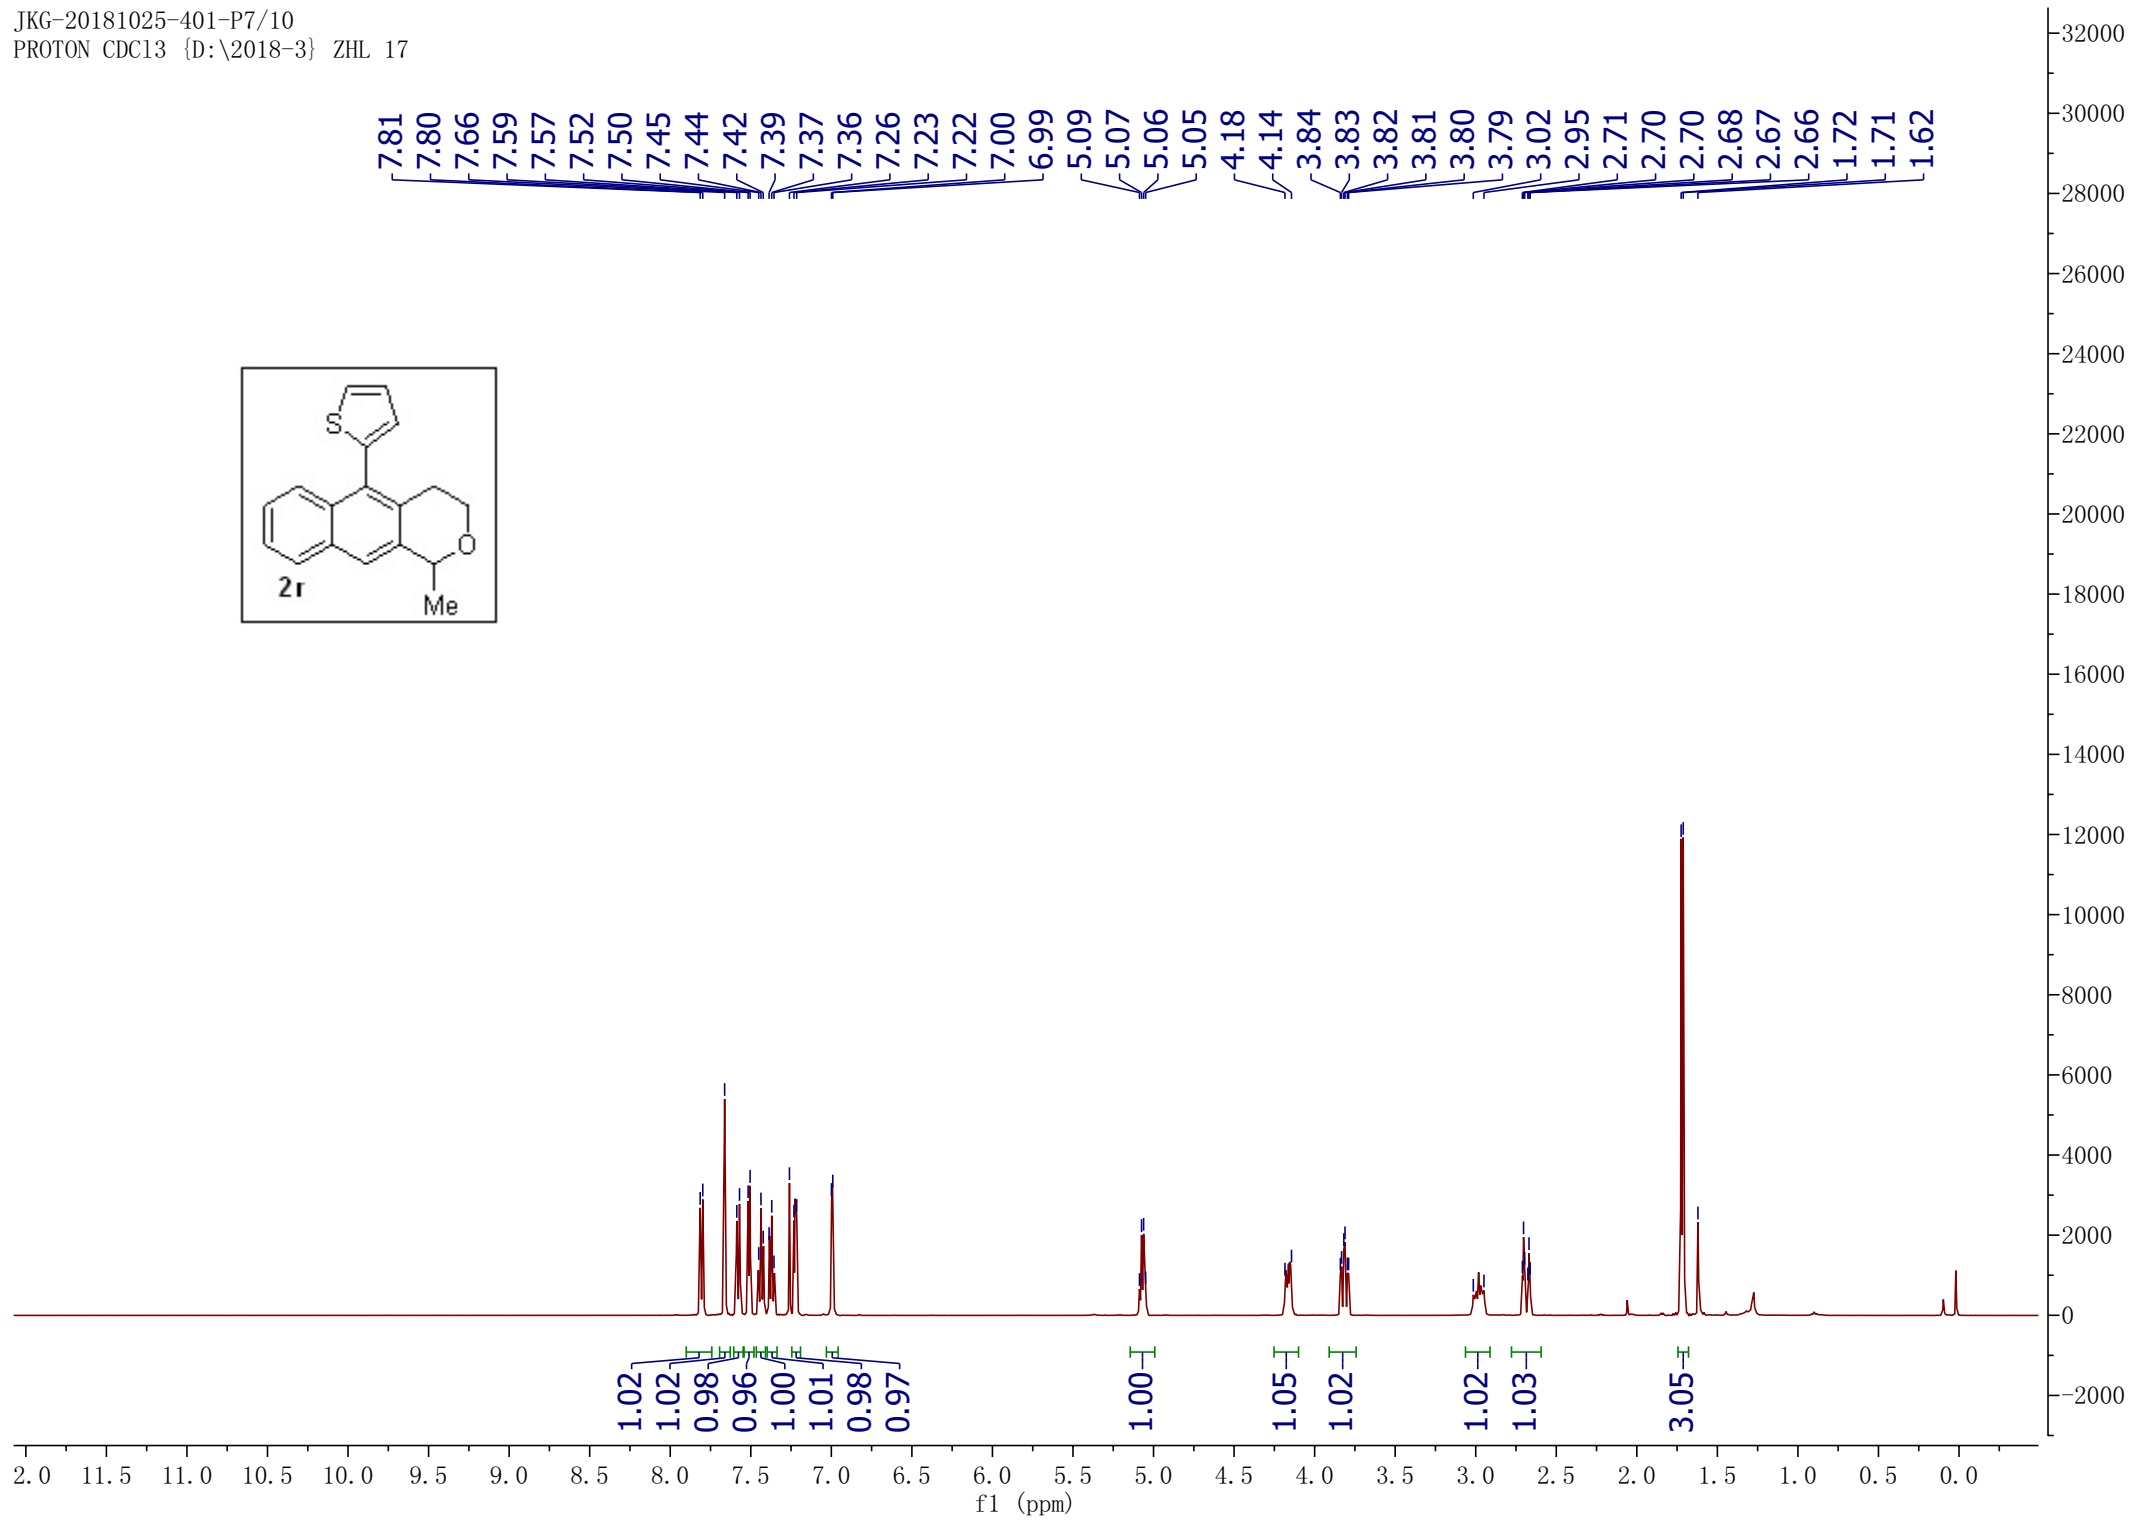

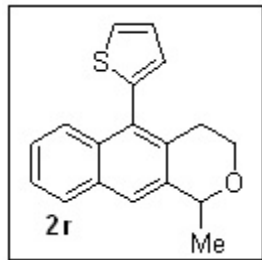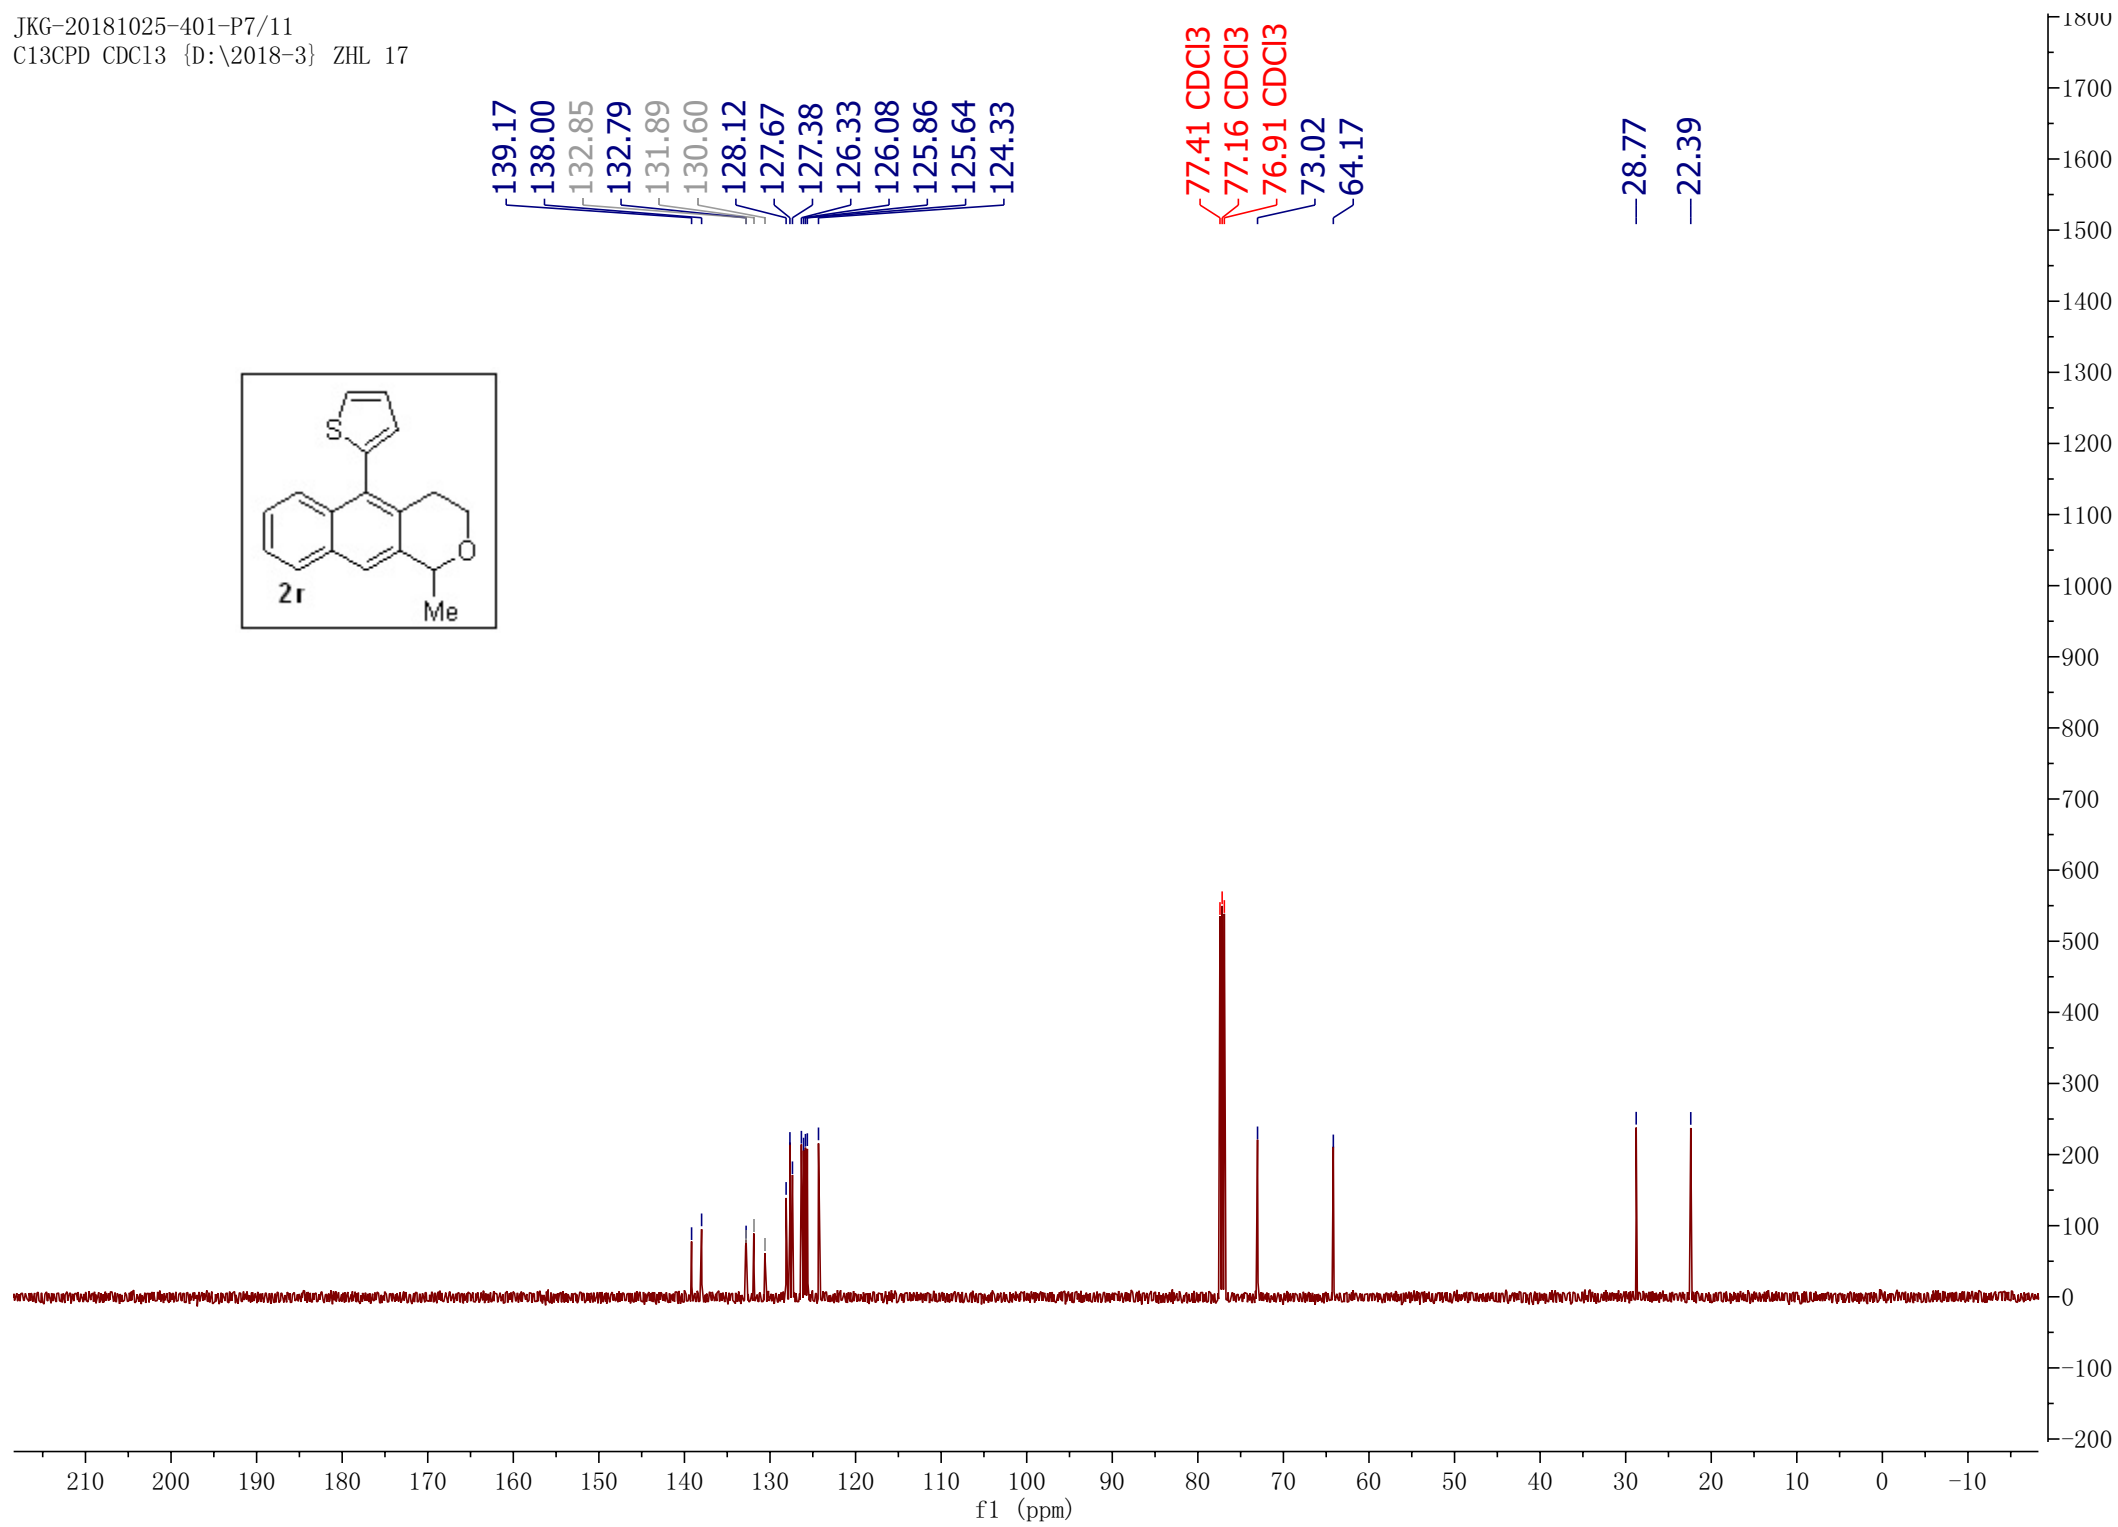

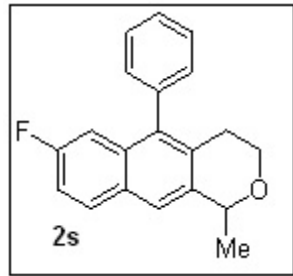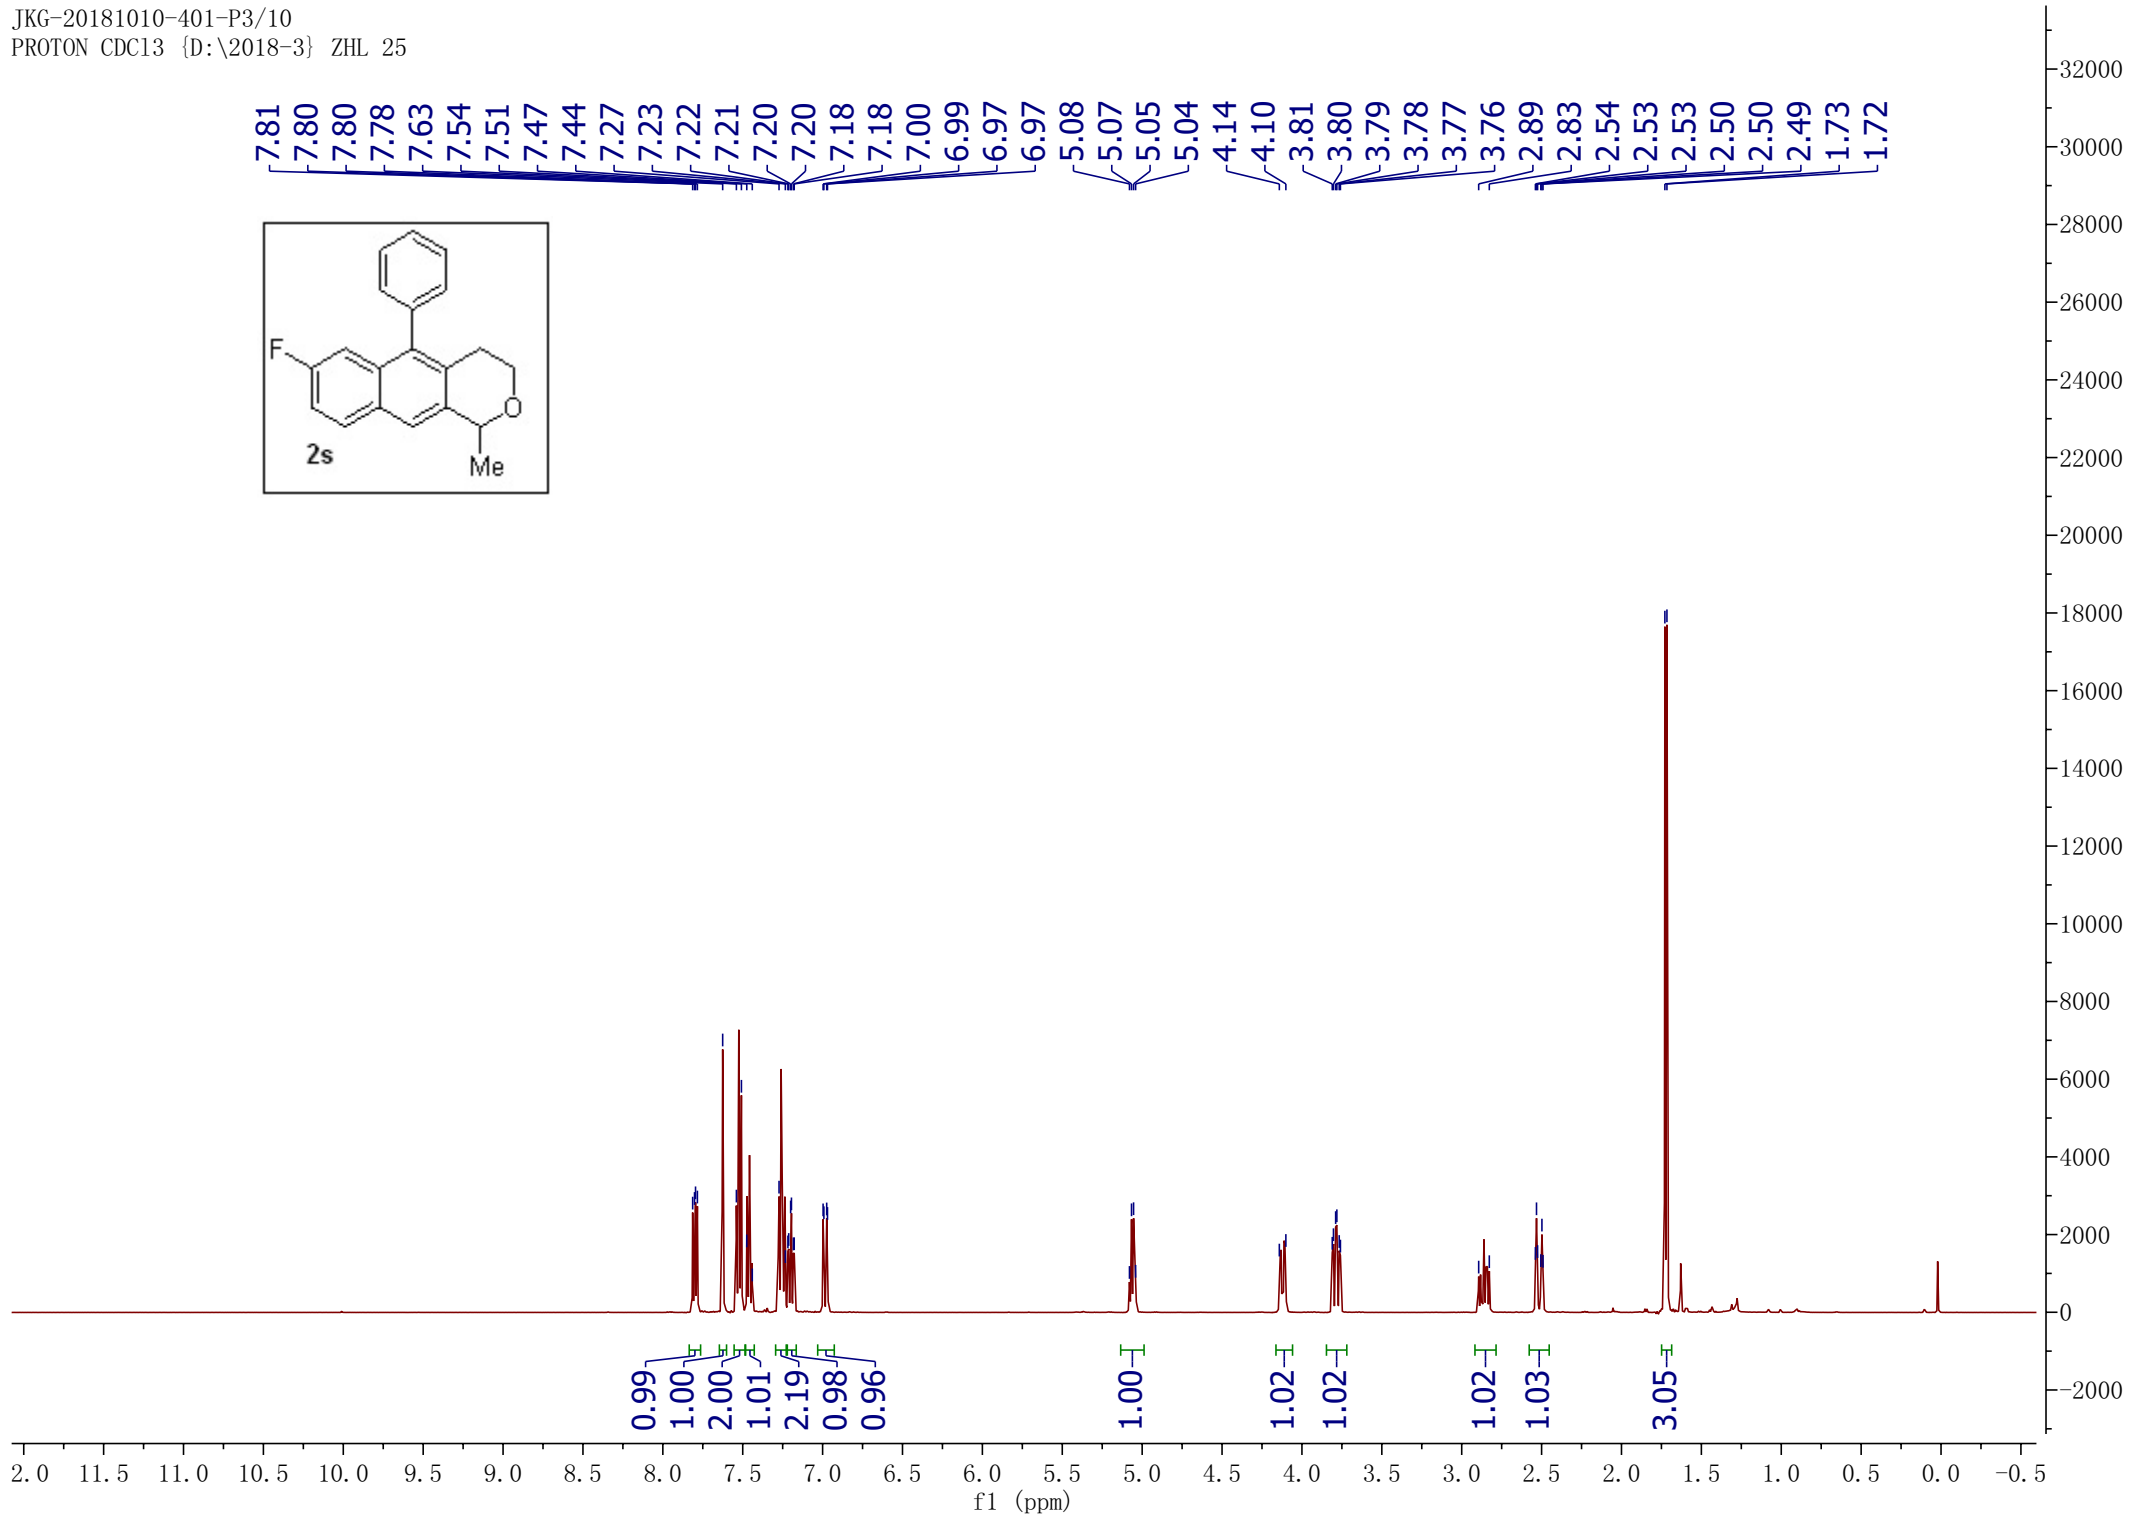

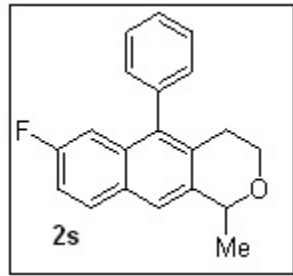

161.62  
159.67  
138.63  
138.02  
137.98  
137.42  
137.40  
132.50  
132.43  
131.20  
130.13  
130.06  
130.02  
129.07  
128.94  
128.82  
127.61  
123.03  
115.98  
115.77  
109.49  
109.31

77.41 CDC13  
77.16 CDC13  
76.91 CDC13  
73.02  
64.17

28.94  
22.35

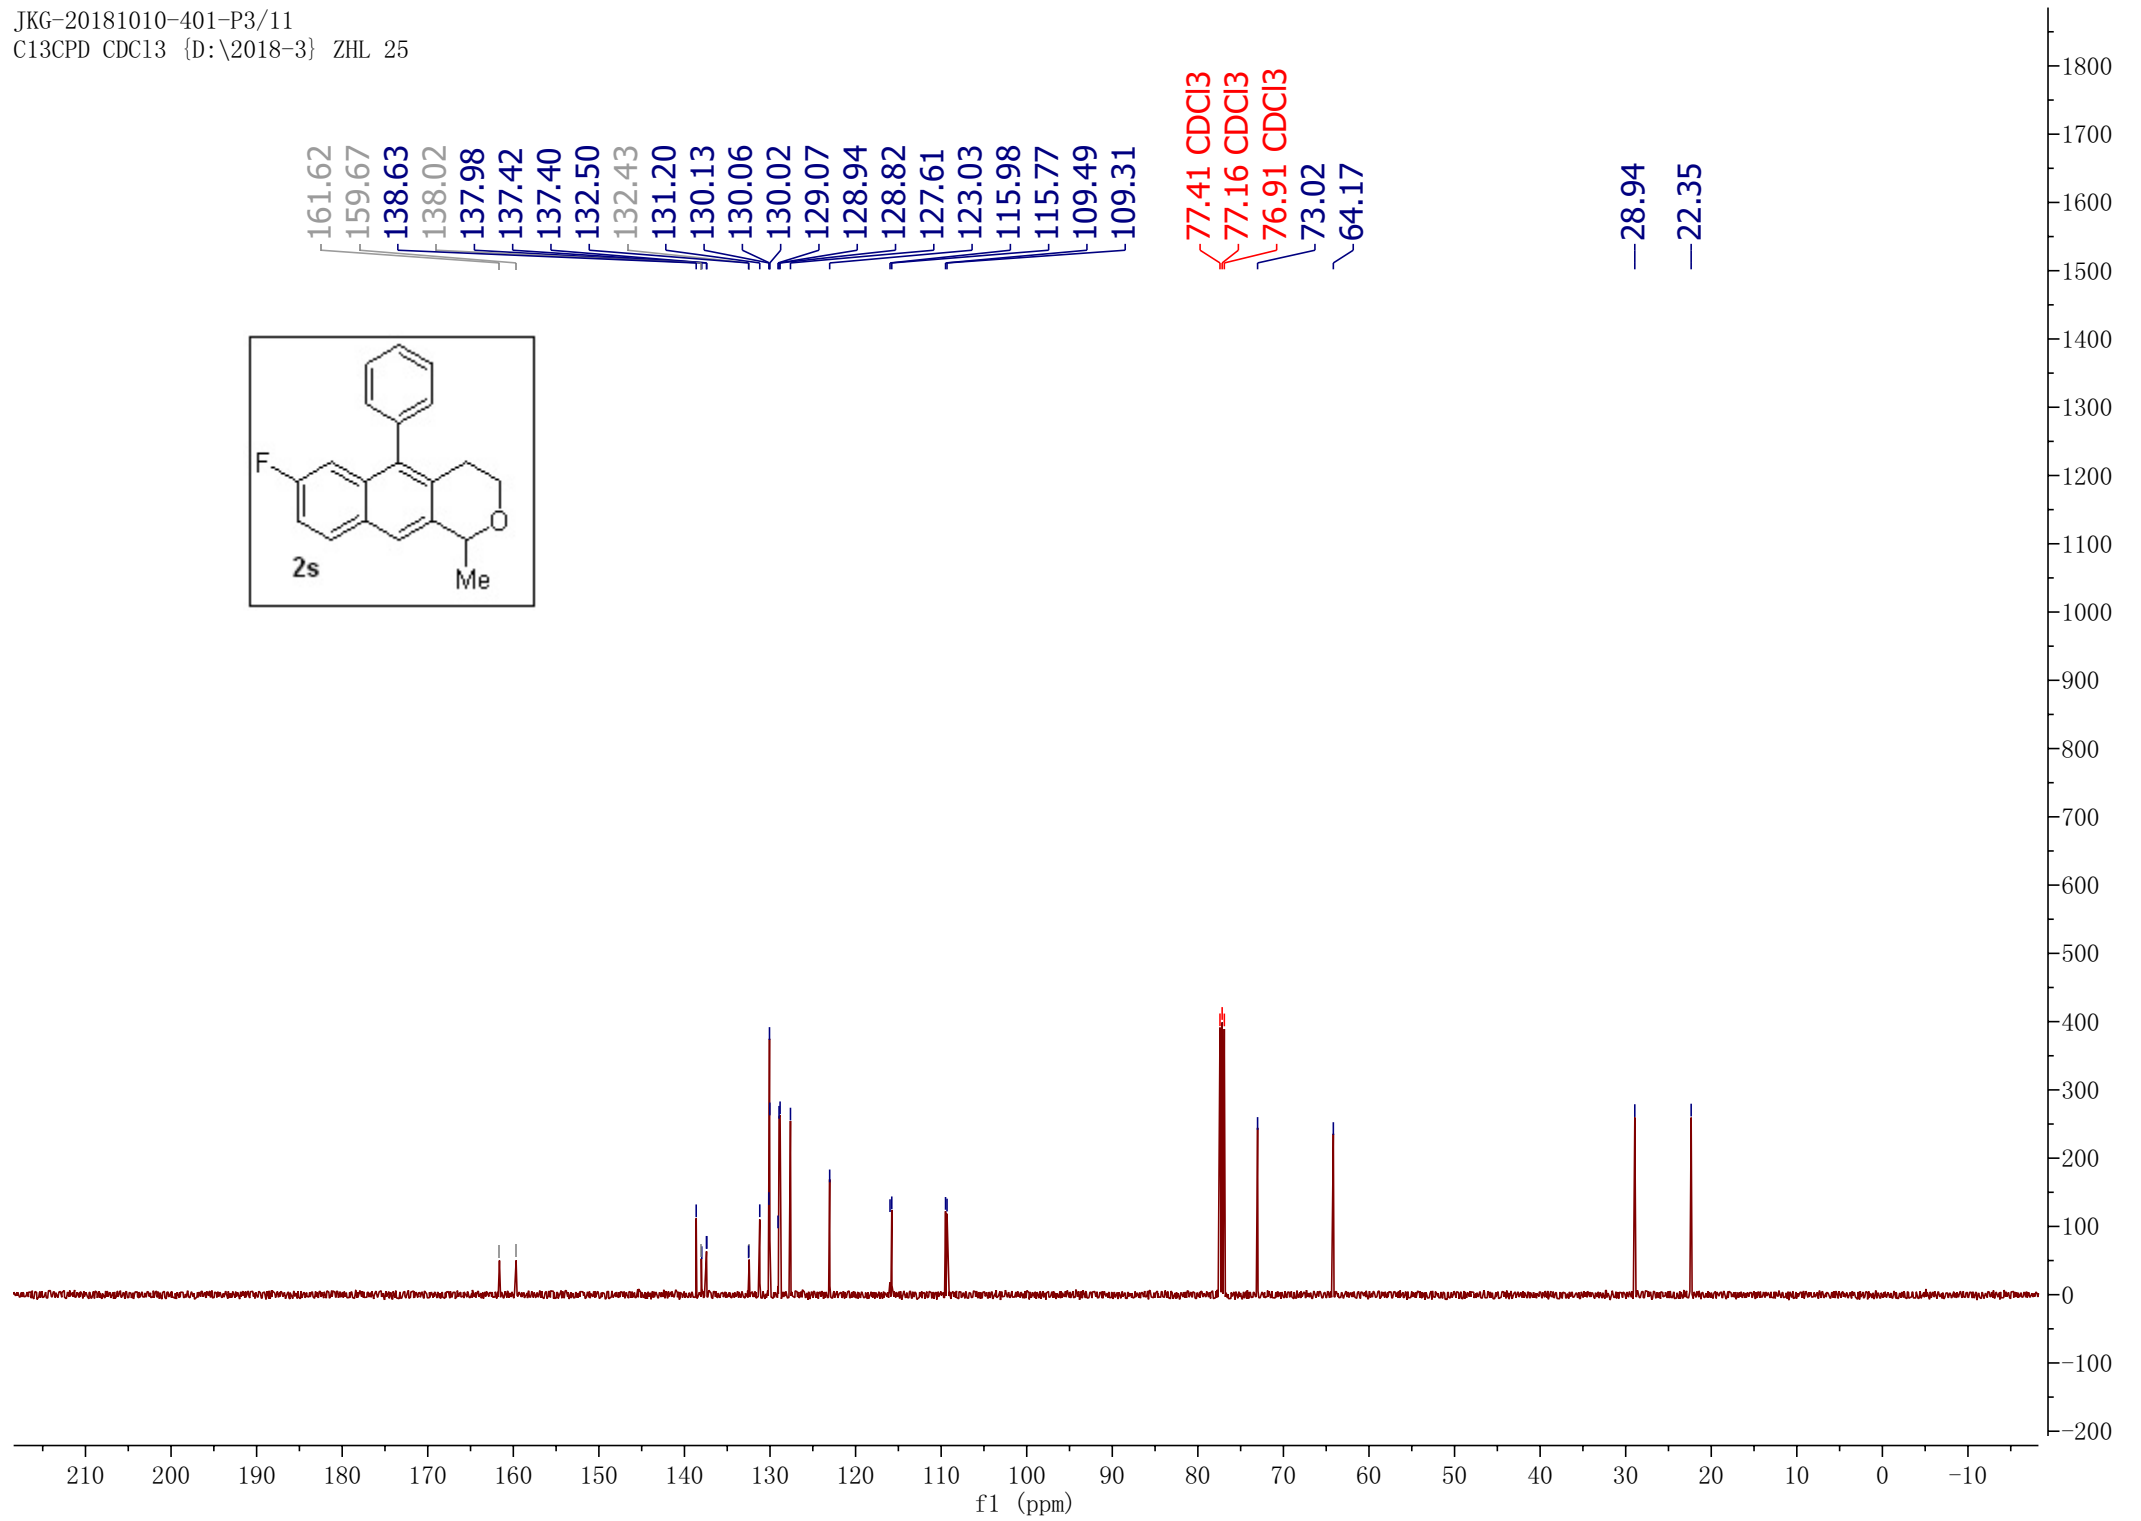



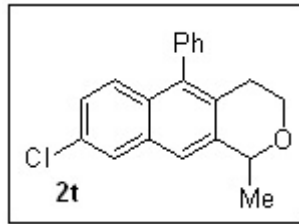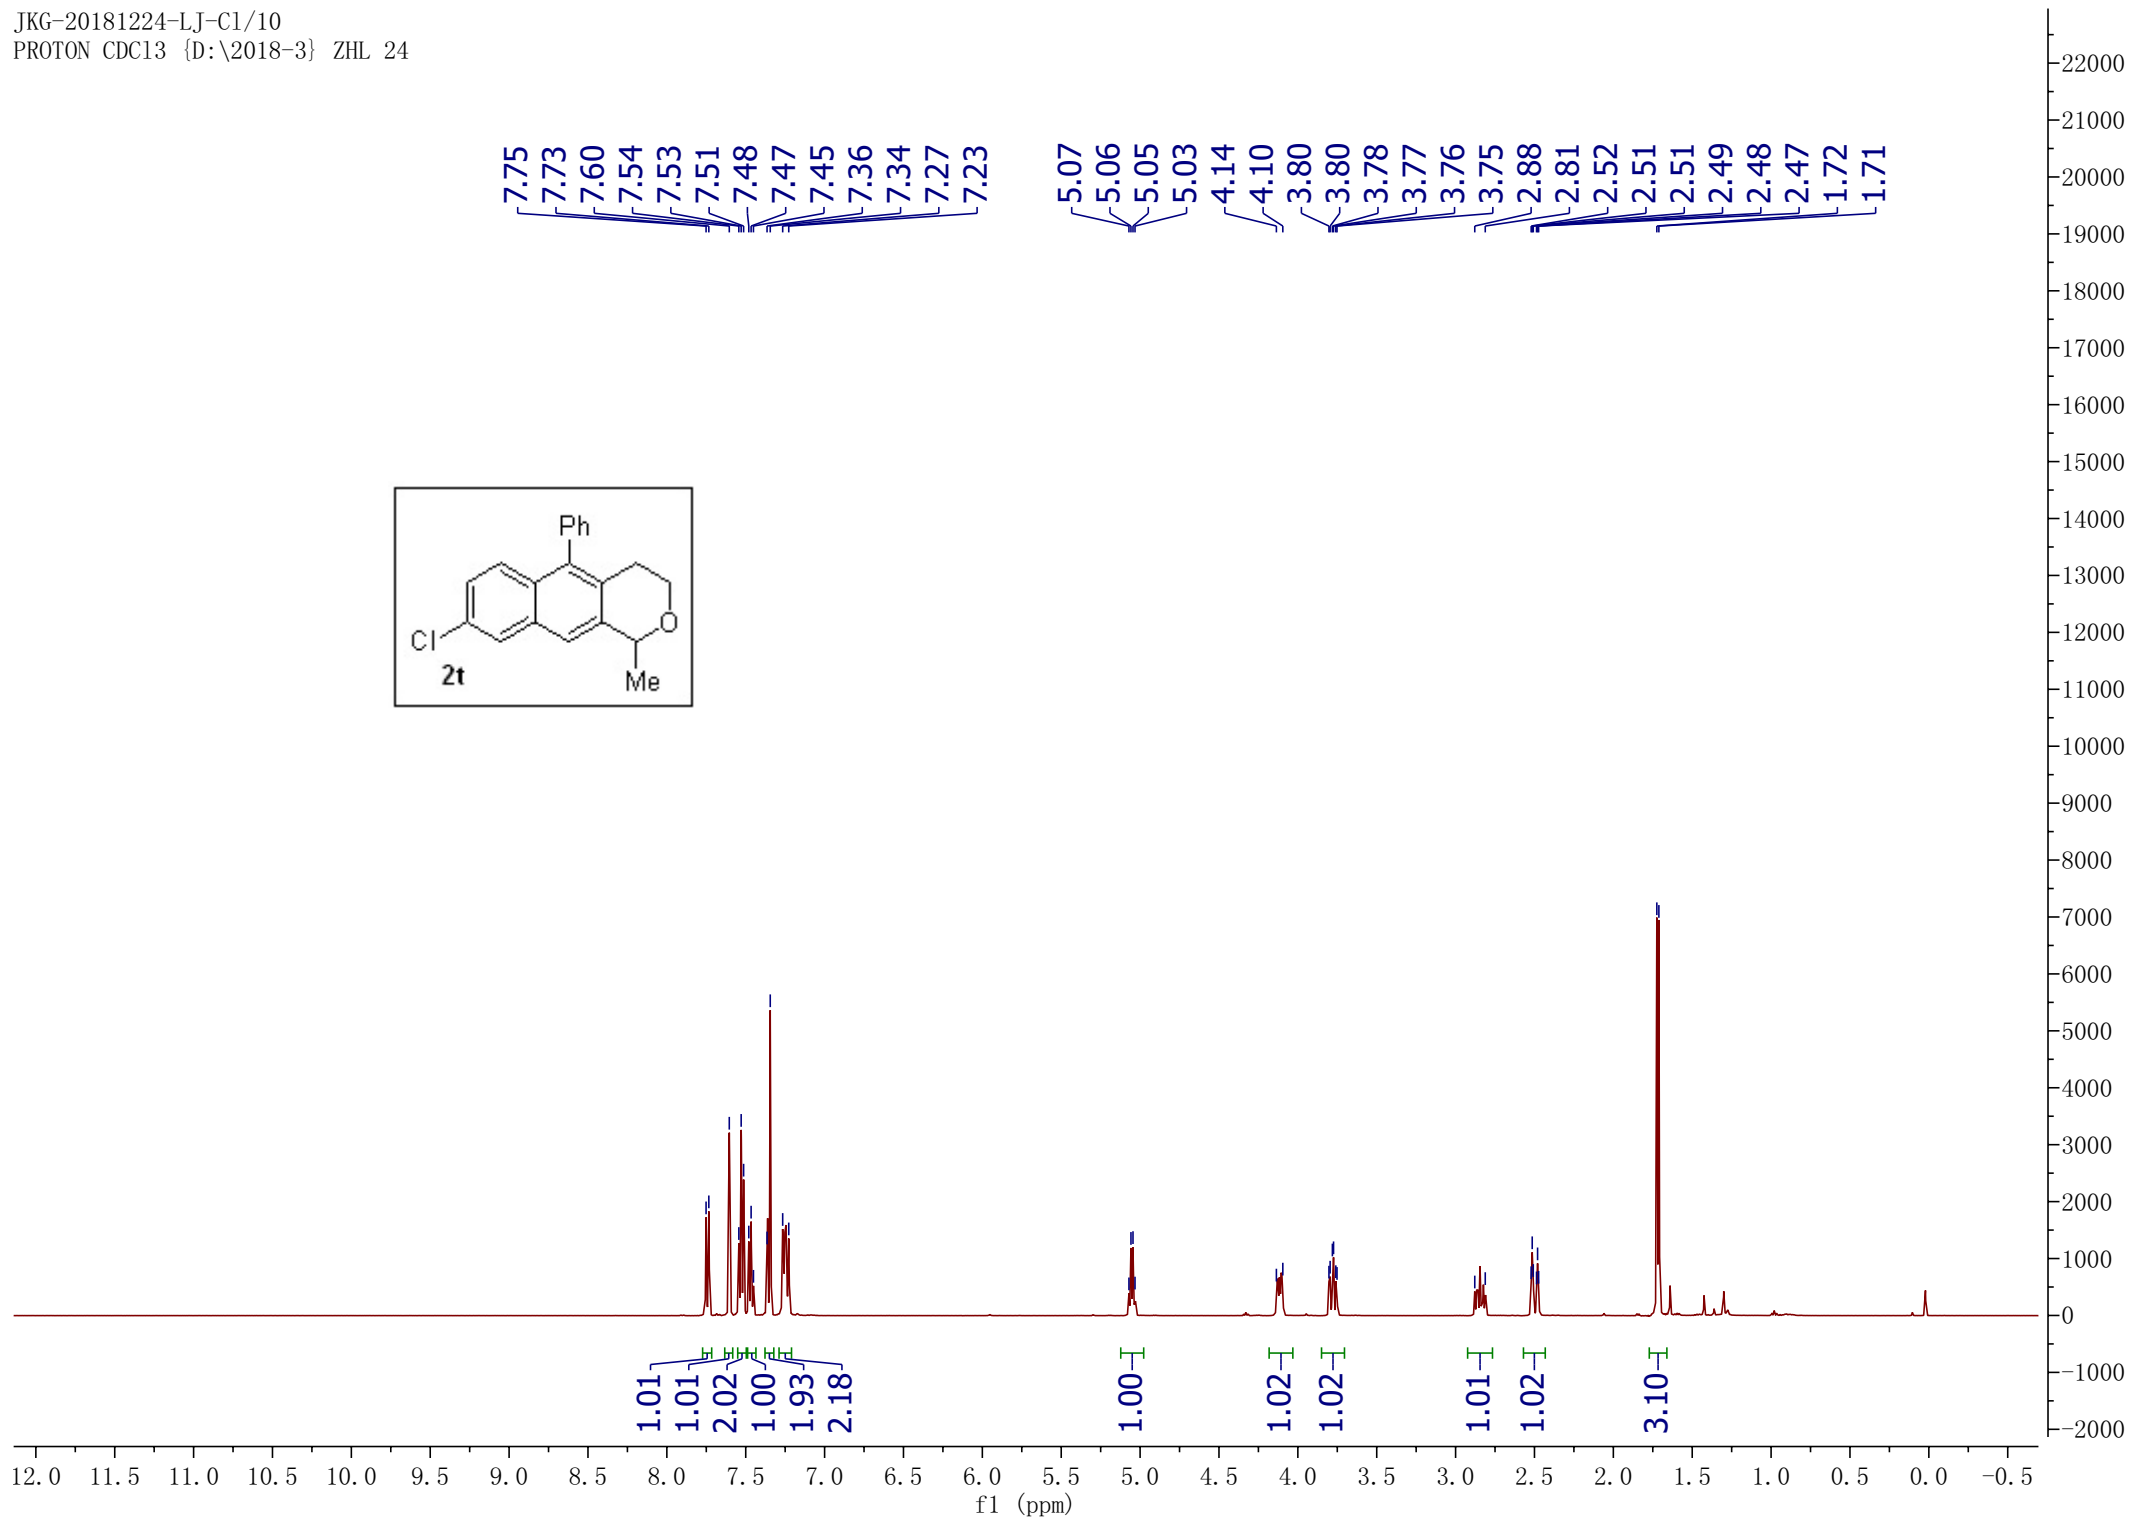



138.46  
138.33  
137.80  
132.26  
131.53  
131.33  
130.24  
130.07  
130.05  
129.35  
128.95  
128.83  
127.66  
126.35  
124.86  
122.98

77.42 CDC13  
77.16 CDC13  
76.91 CDC13  
73.03  
64.13

28.90  
22.30

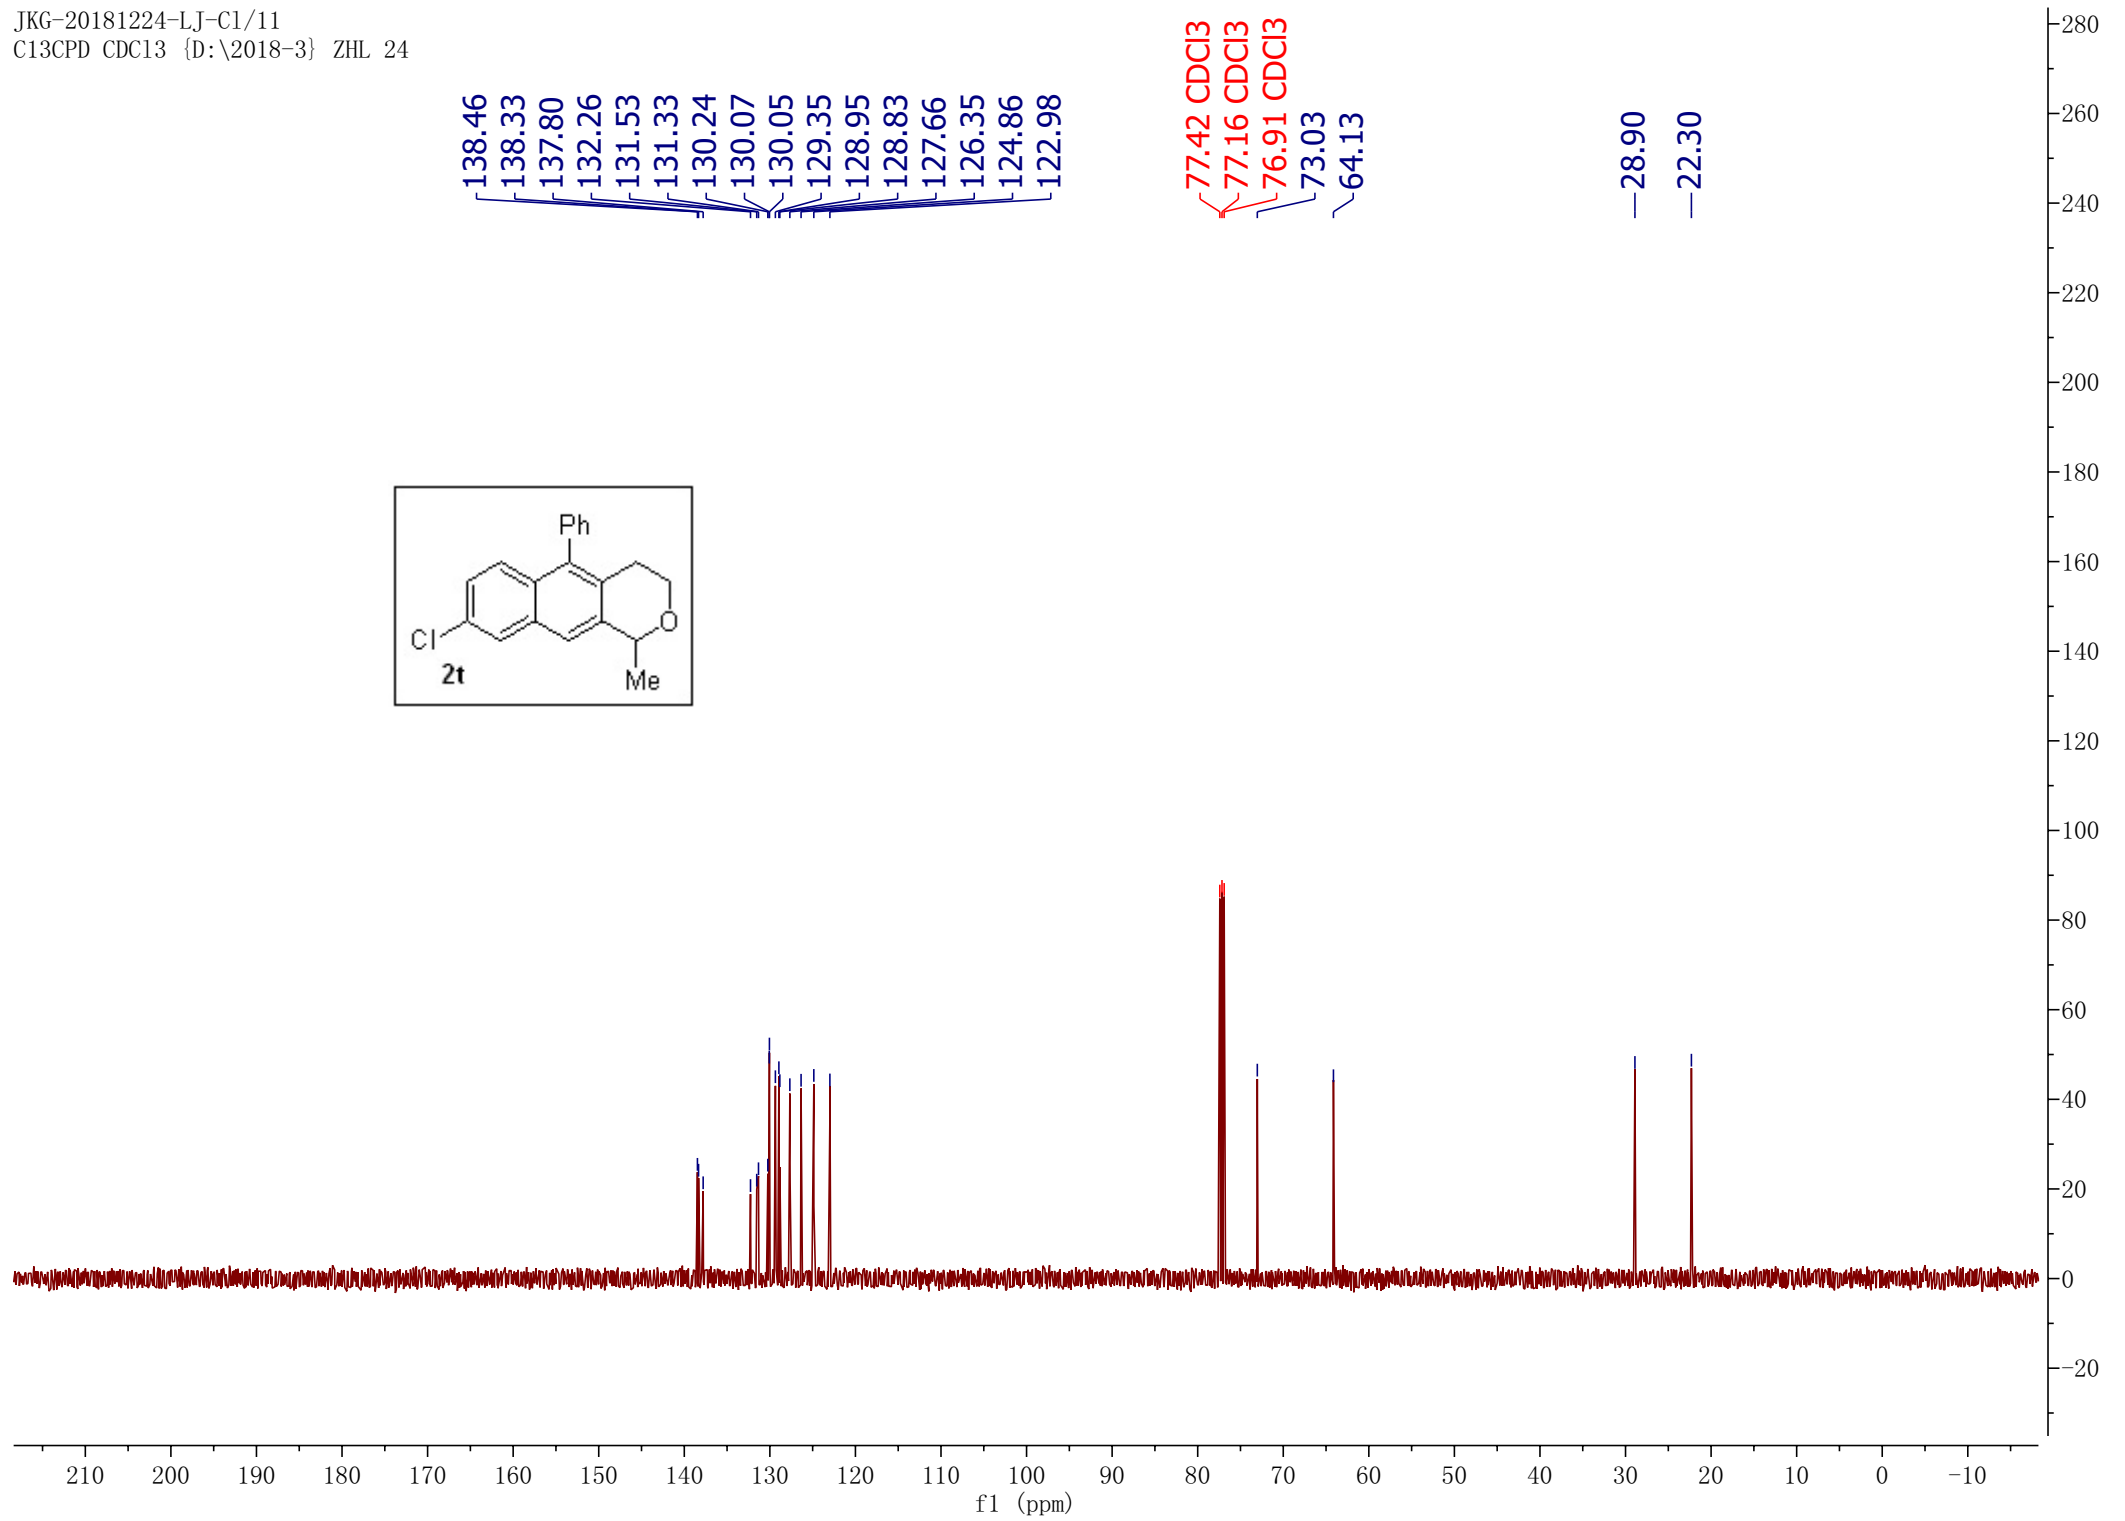

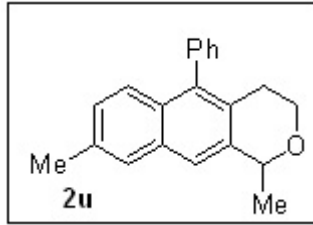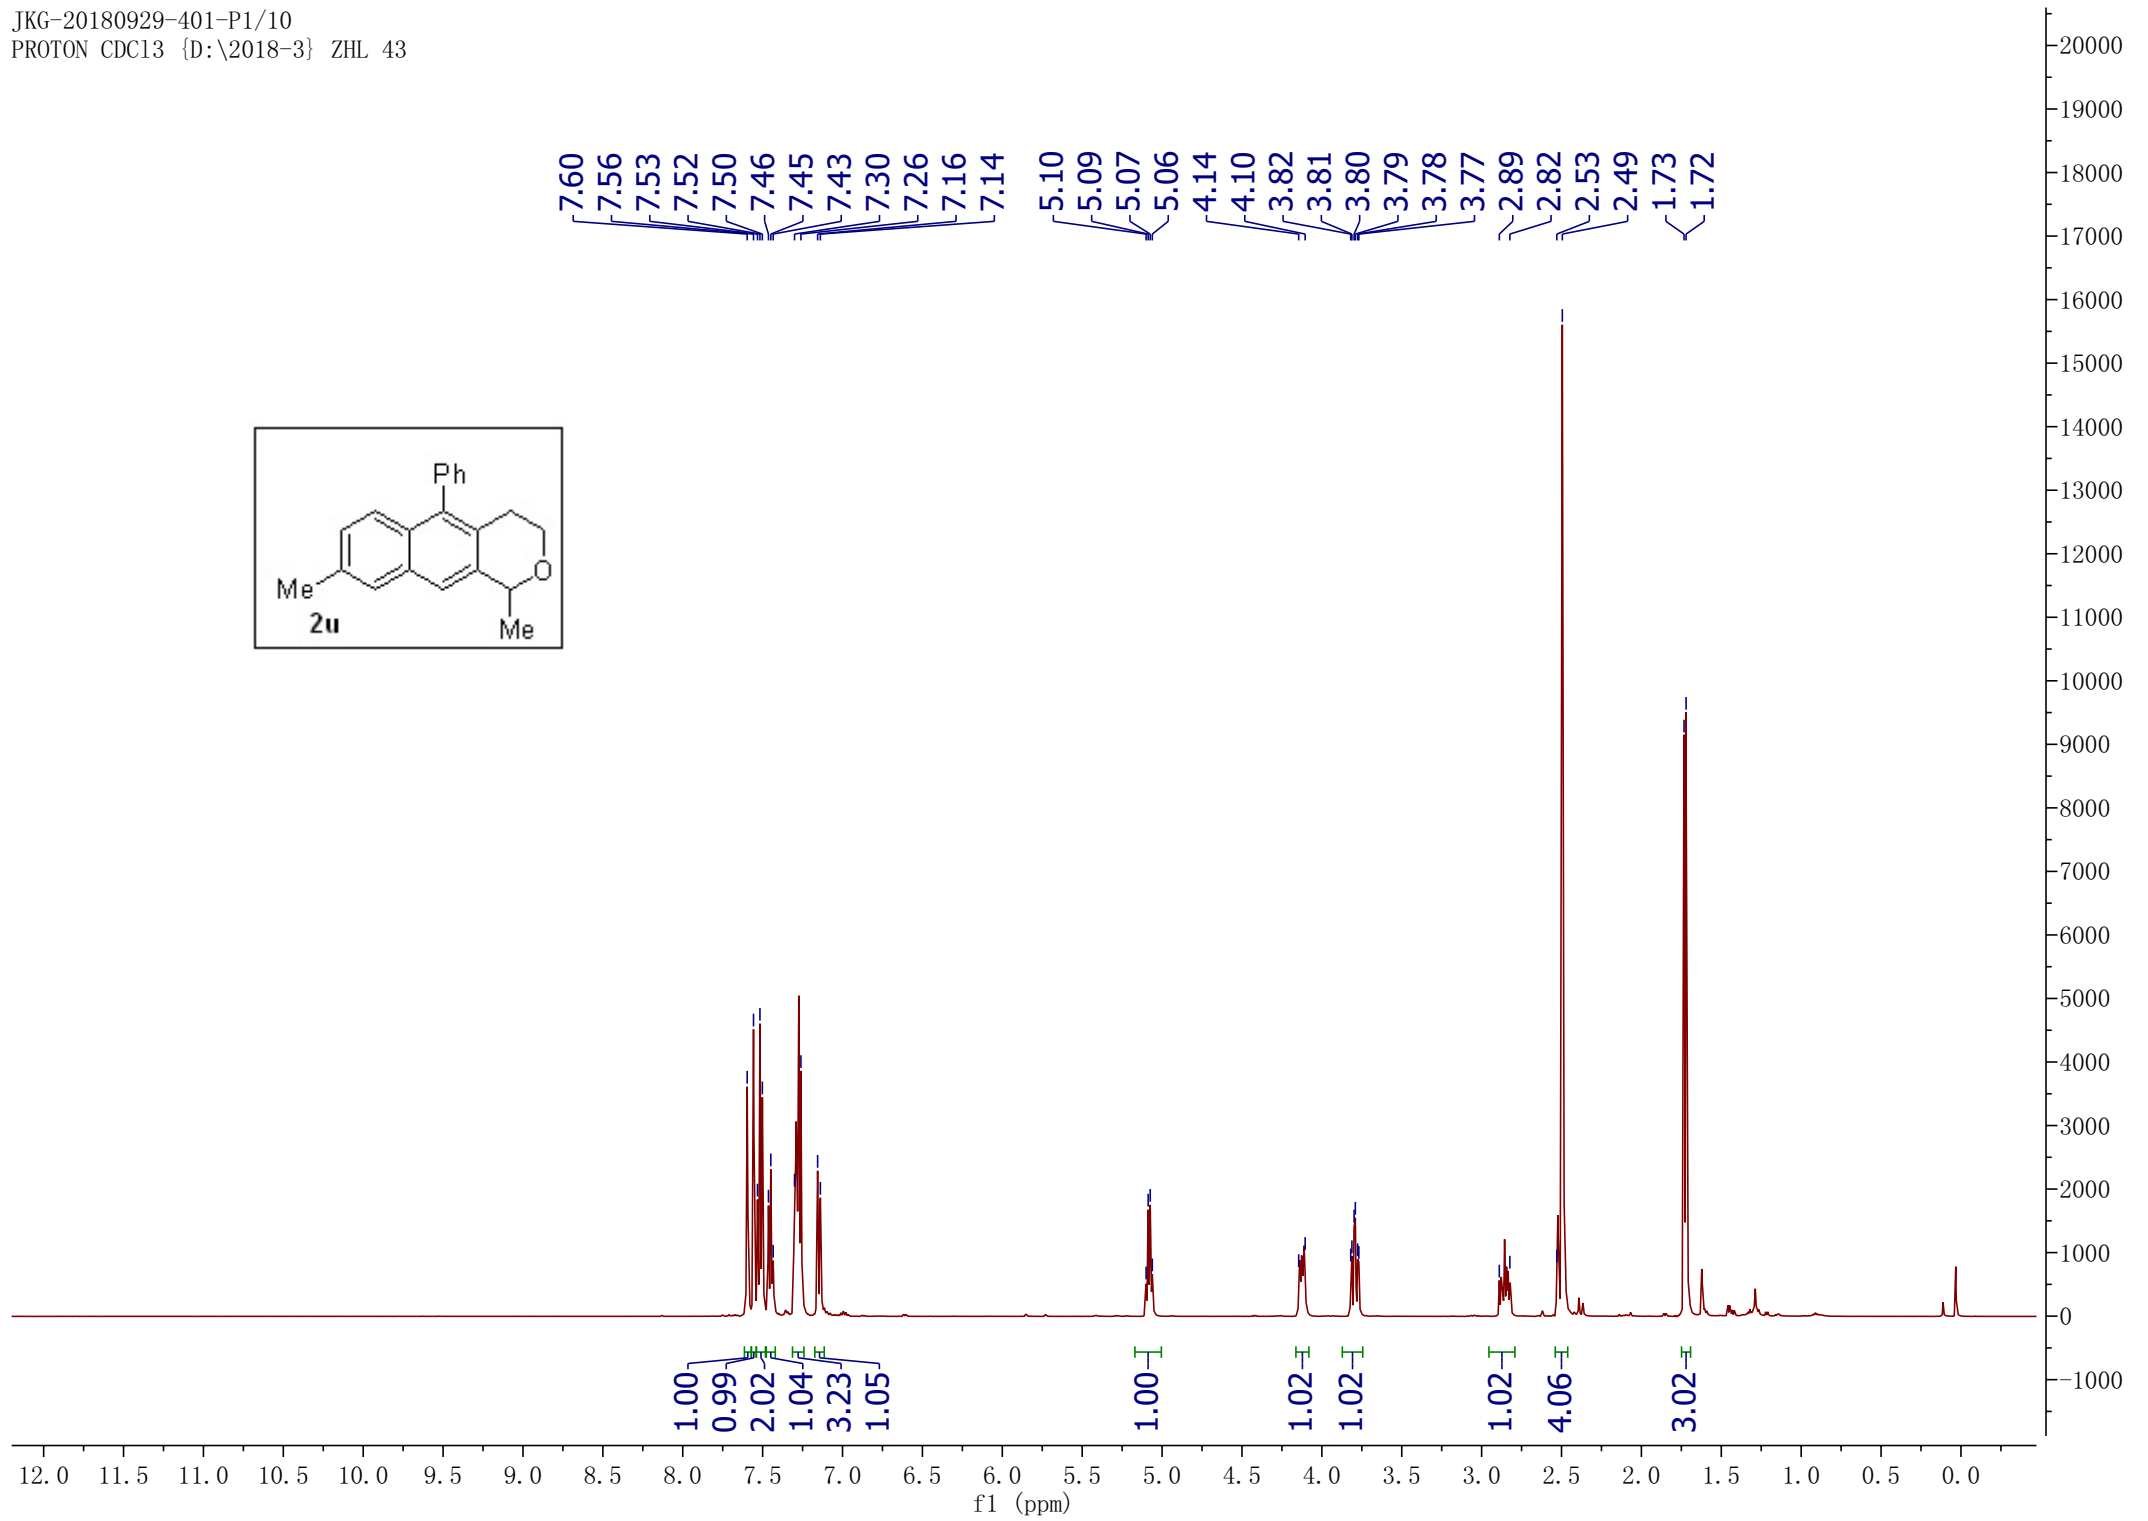

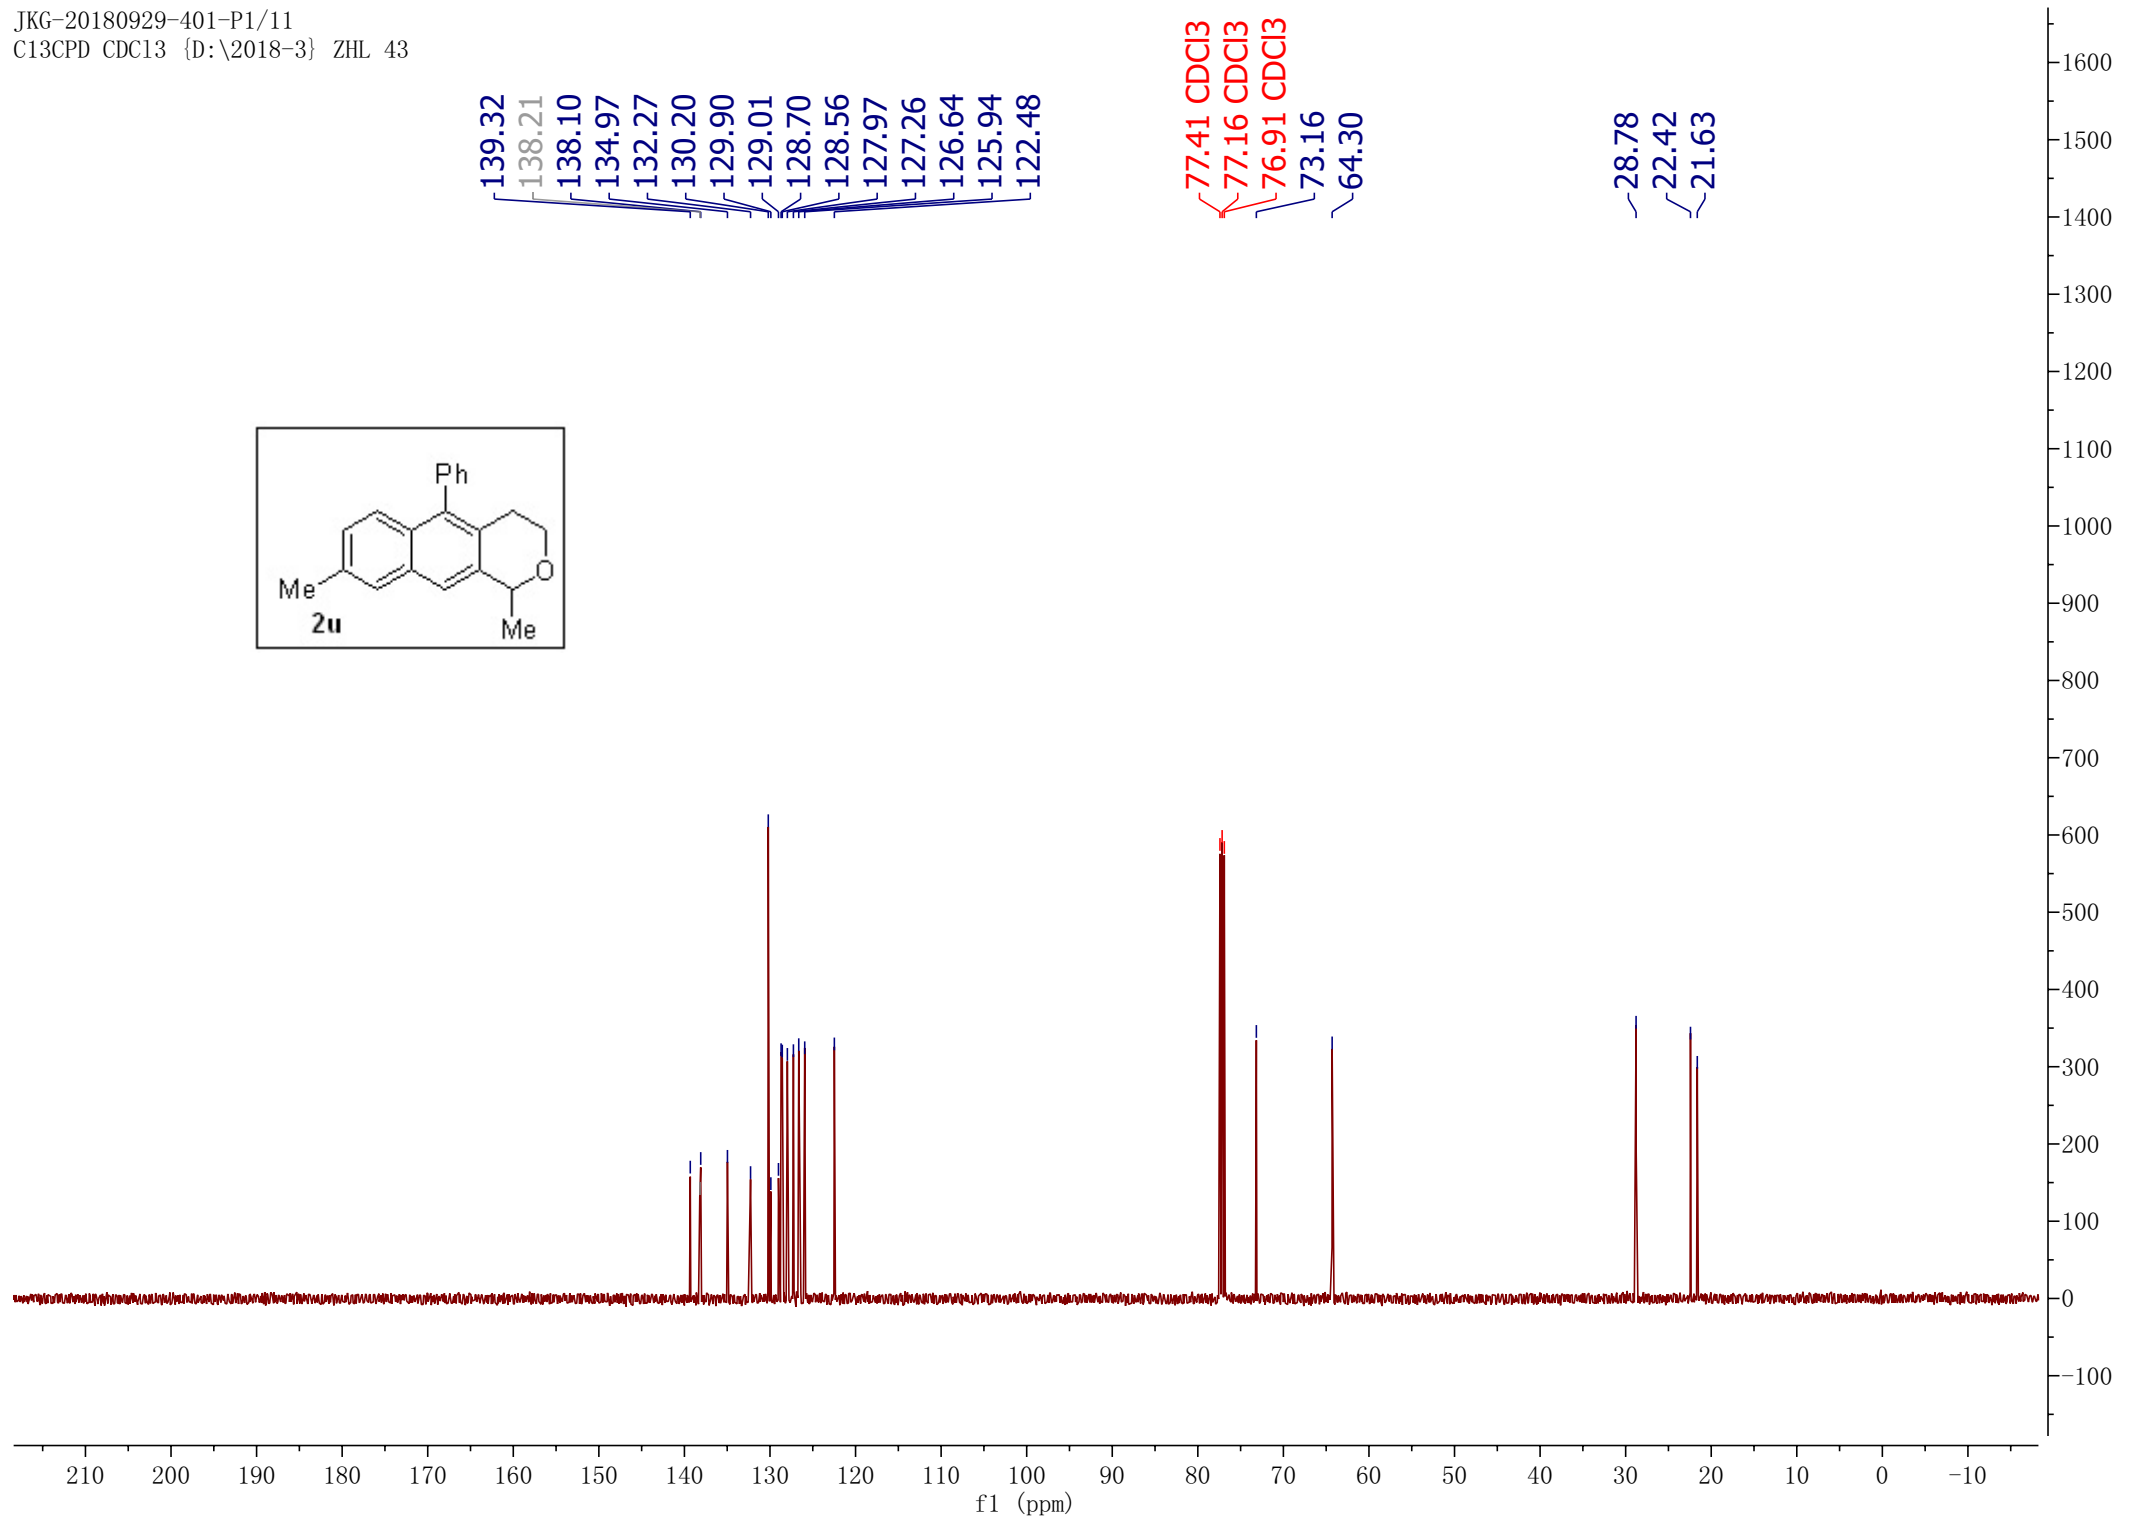

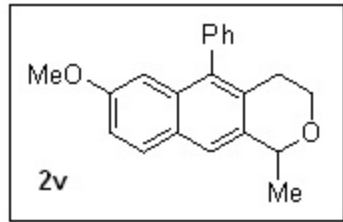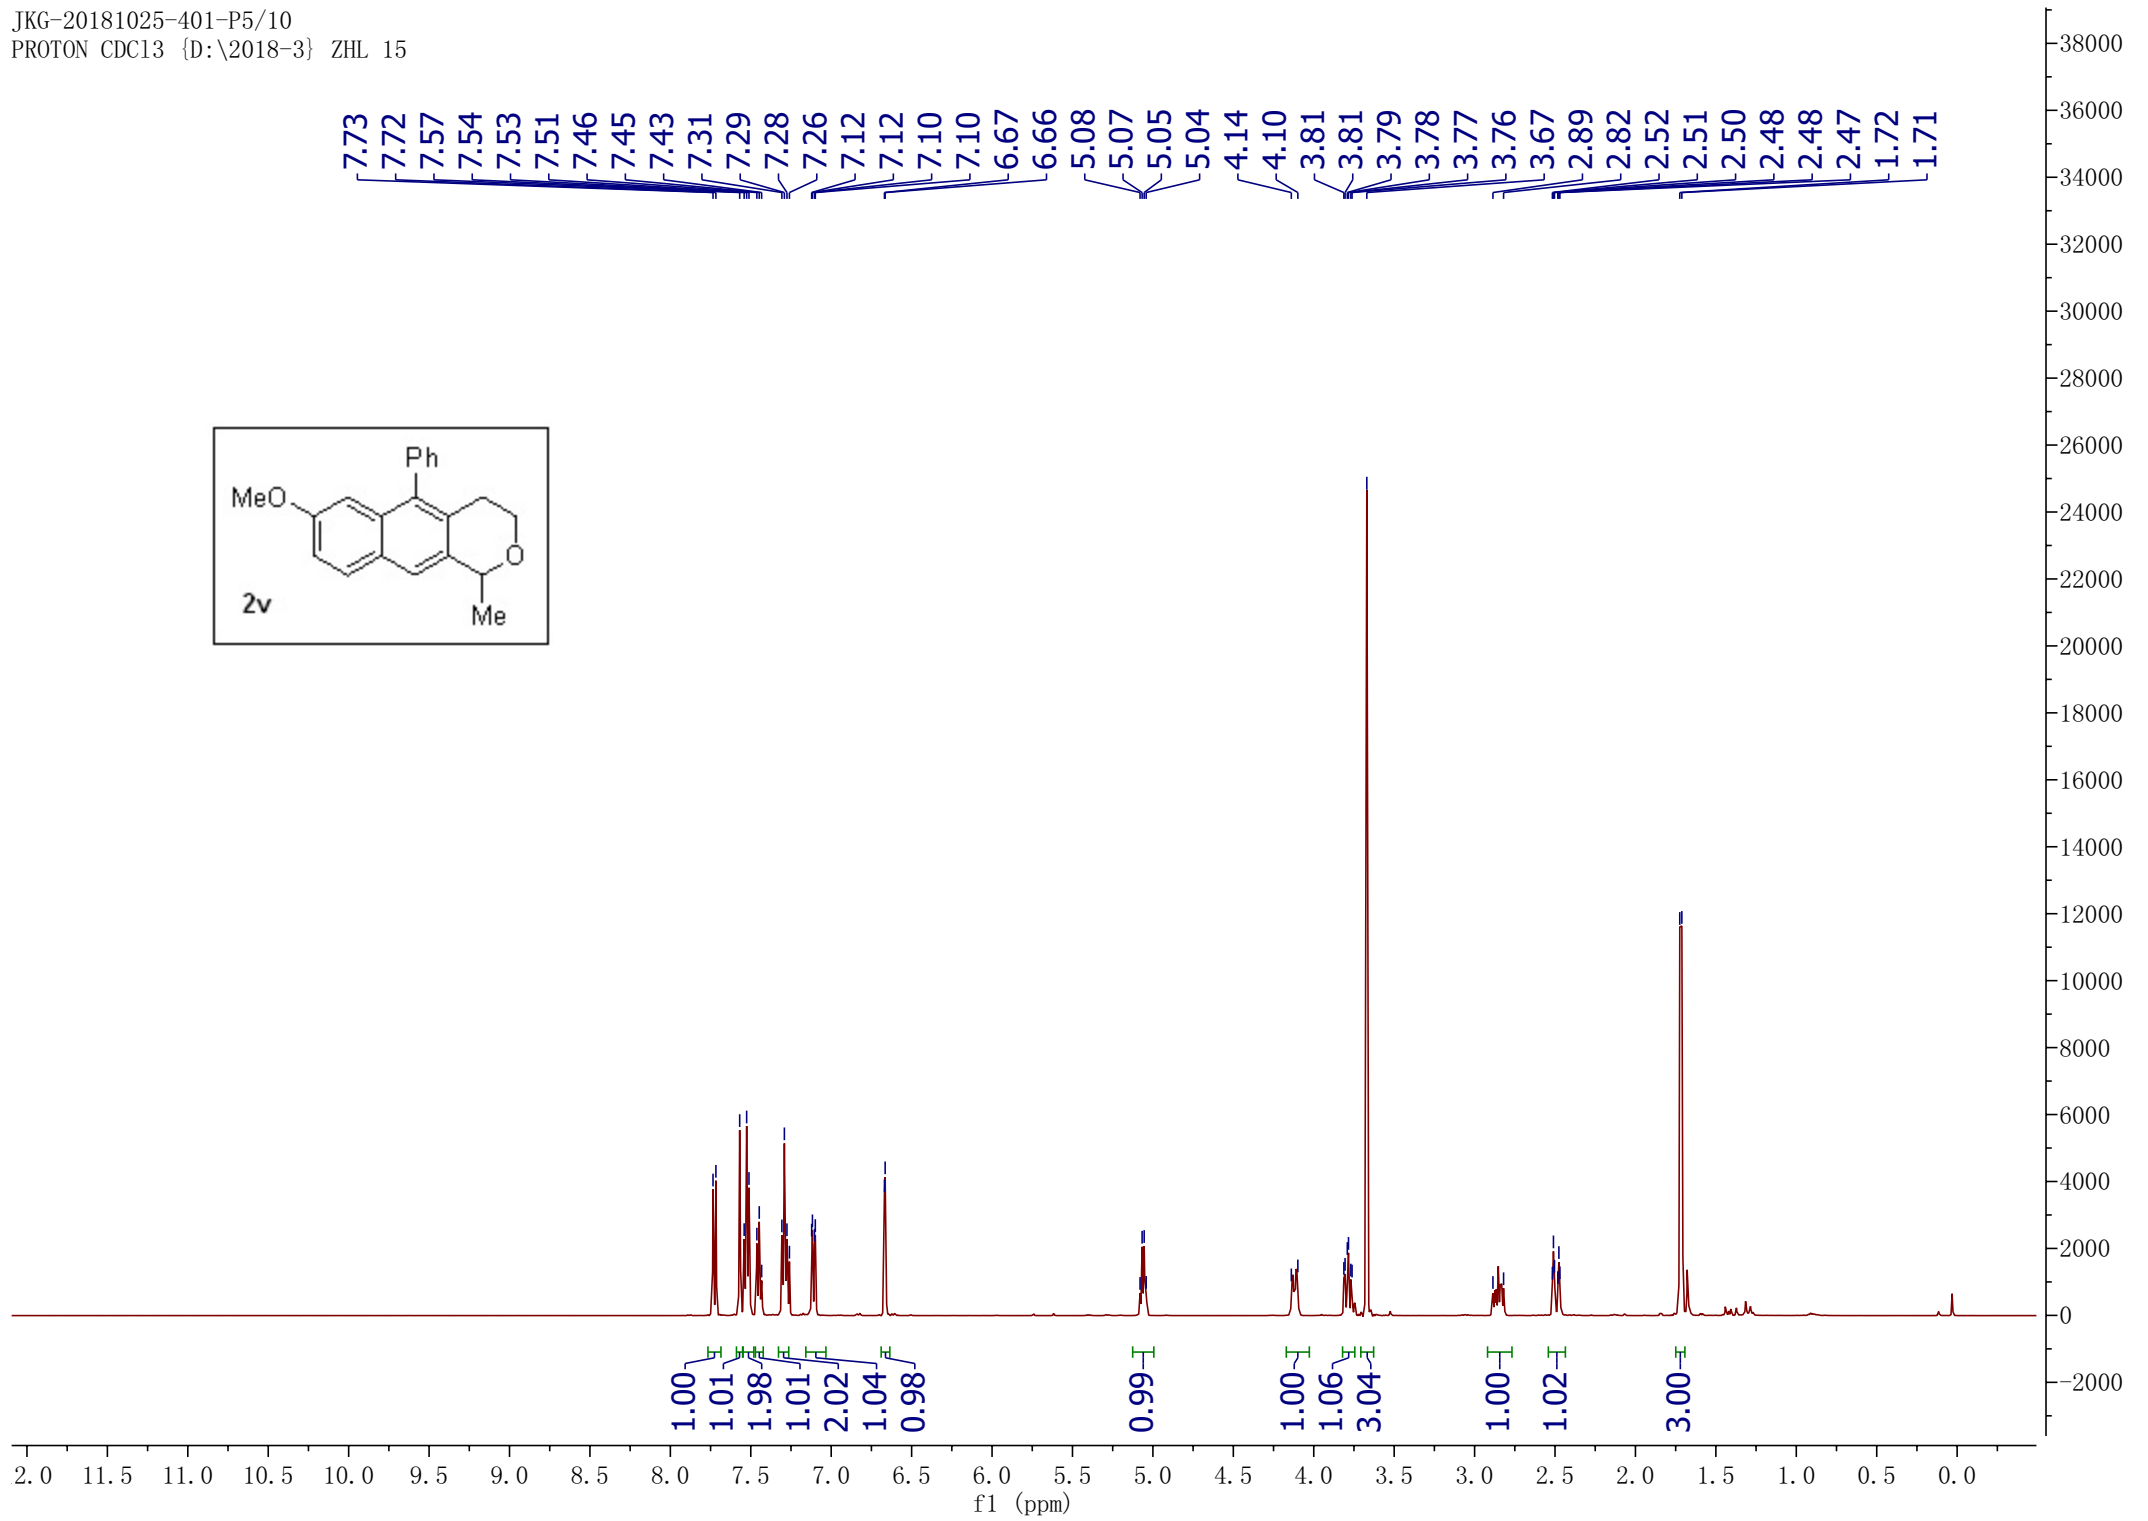

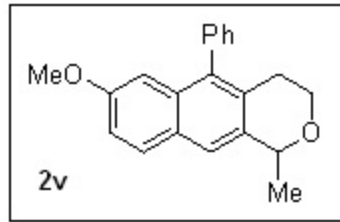

157.45  
139.34  
137.27  
135.74  
132.62  
130.47  
130.15  
130.09  
129.28  
128.87  
128.71  
127.65  
127.32  
122.88  
118.00  
-104.55

77.41 CDC13  
77.16 CDC13  
76.91 CDC13  
73.05  
64.27  
-55.15

-28.99  
-22.39

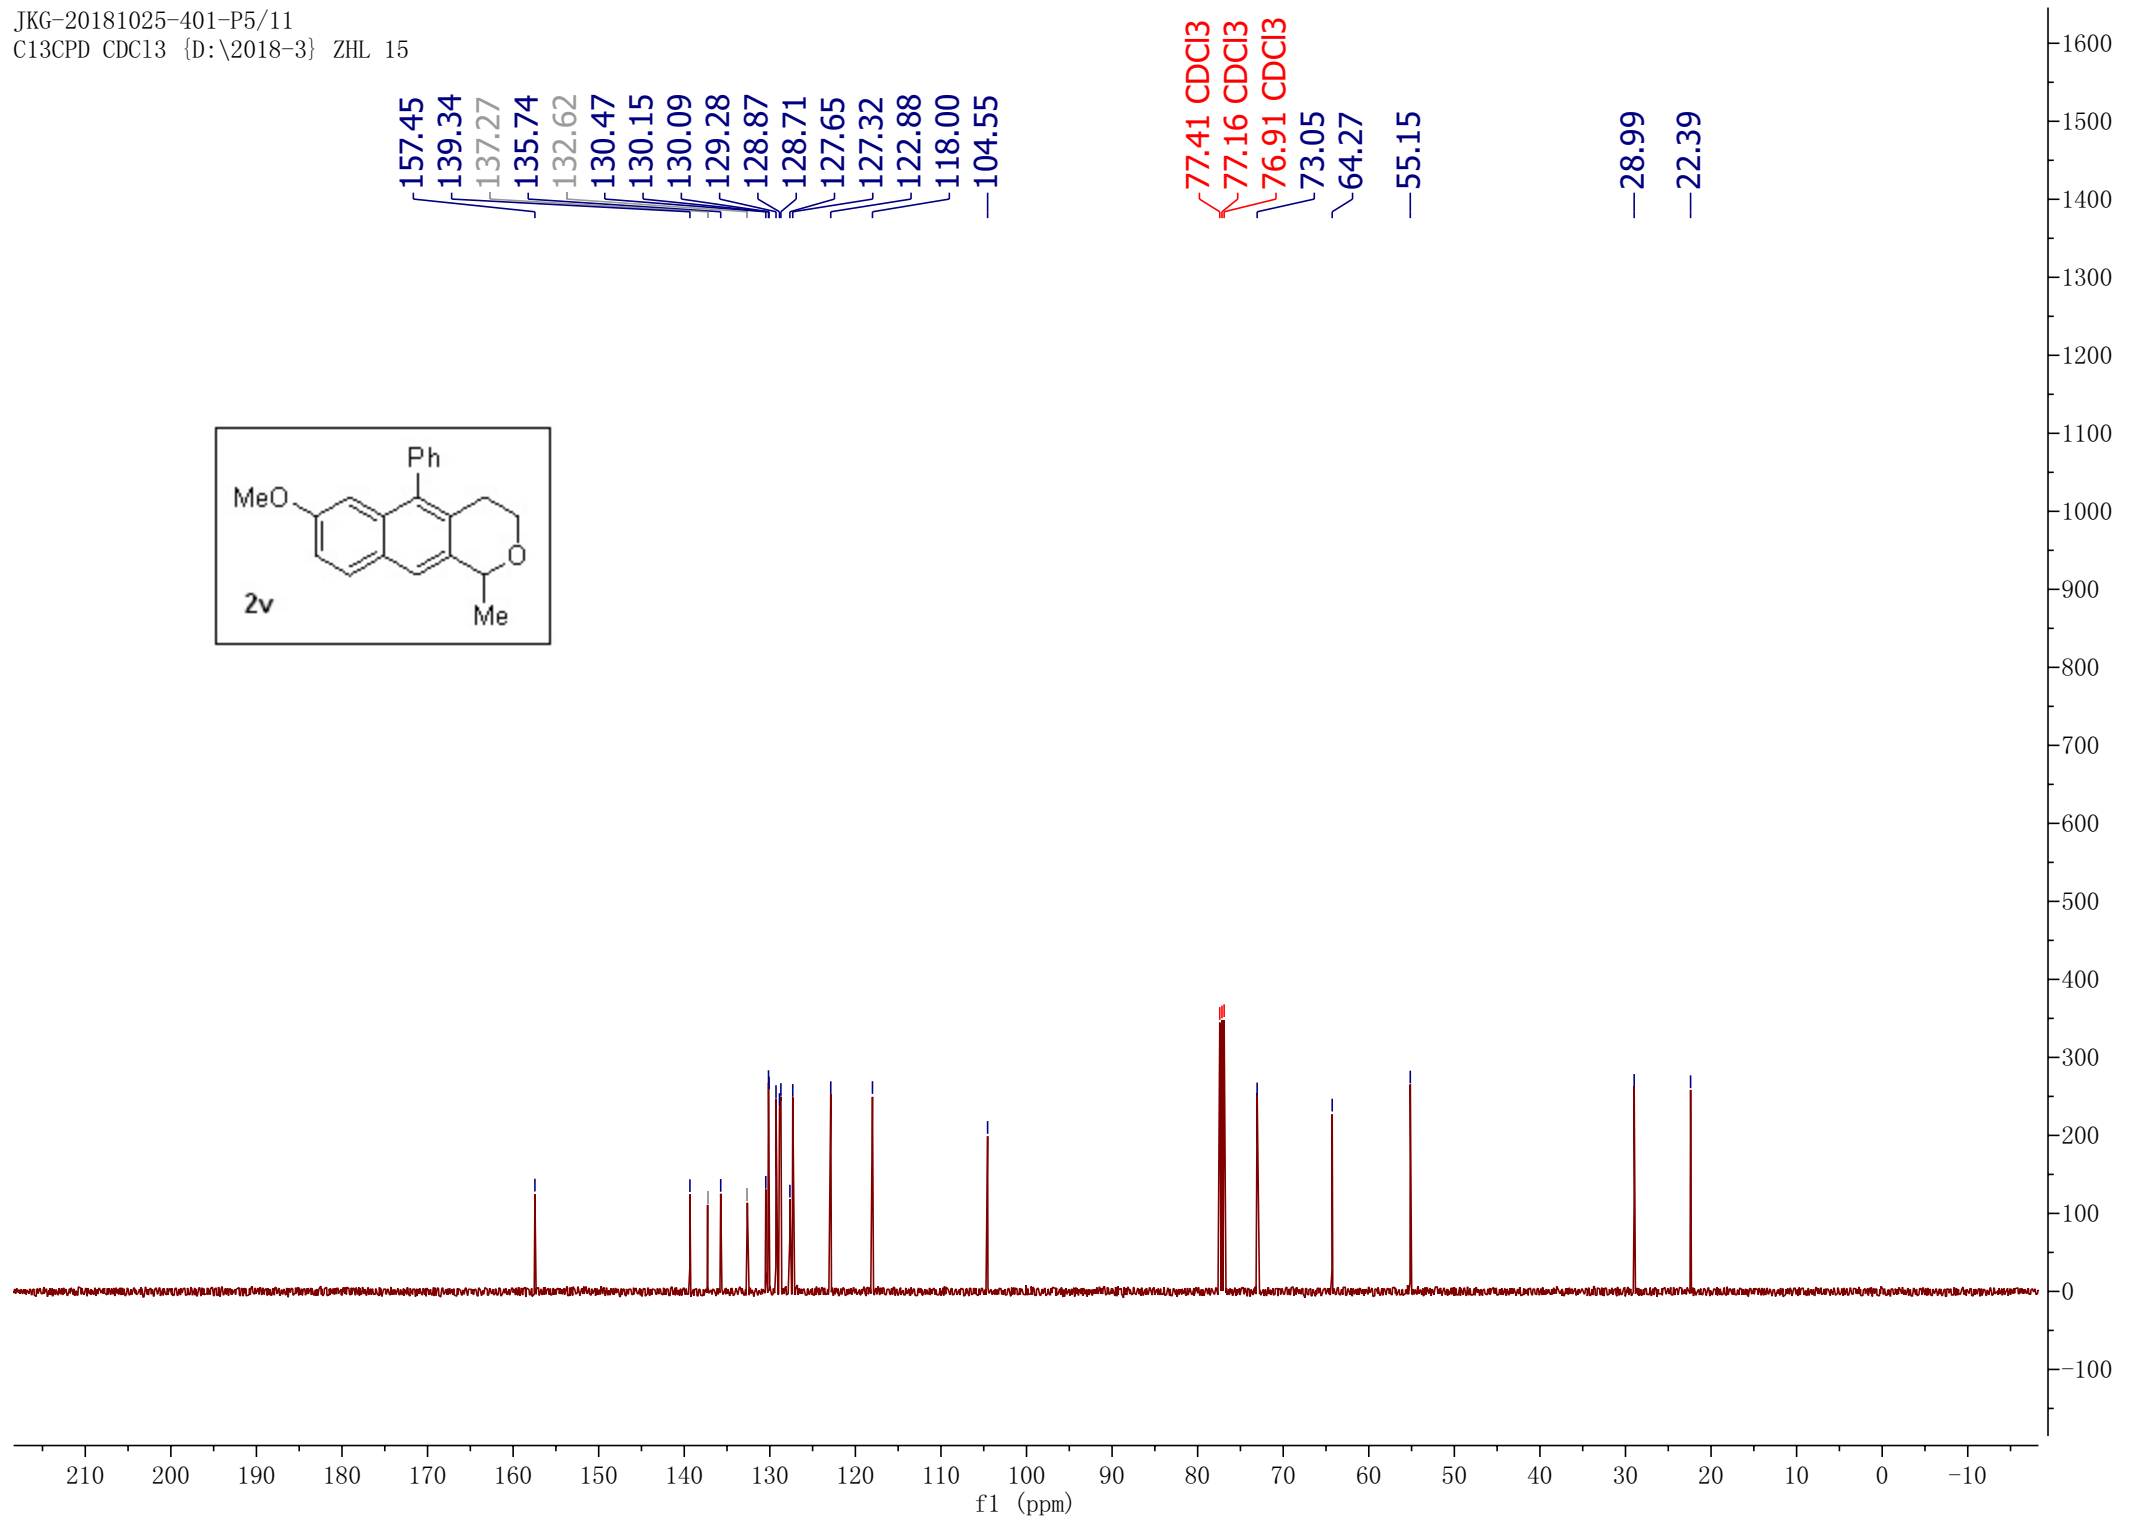

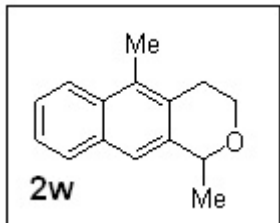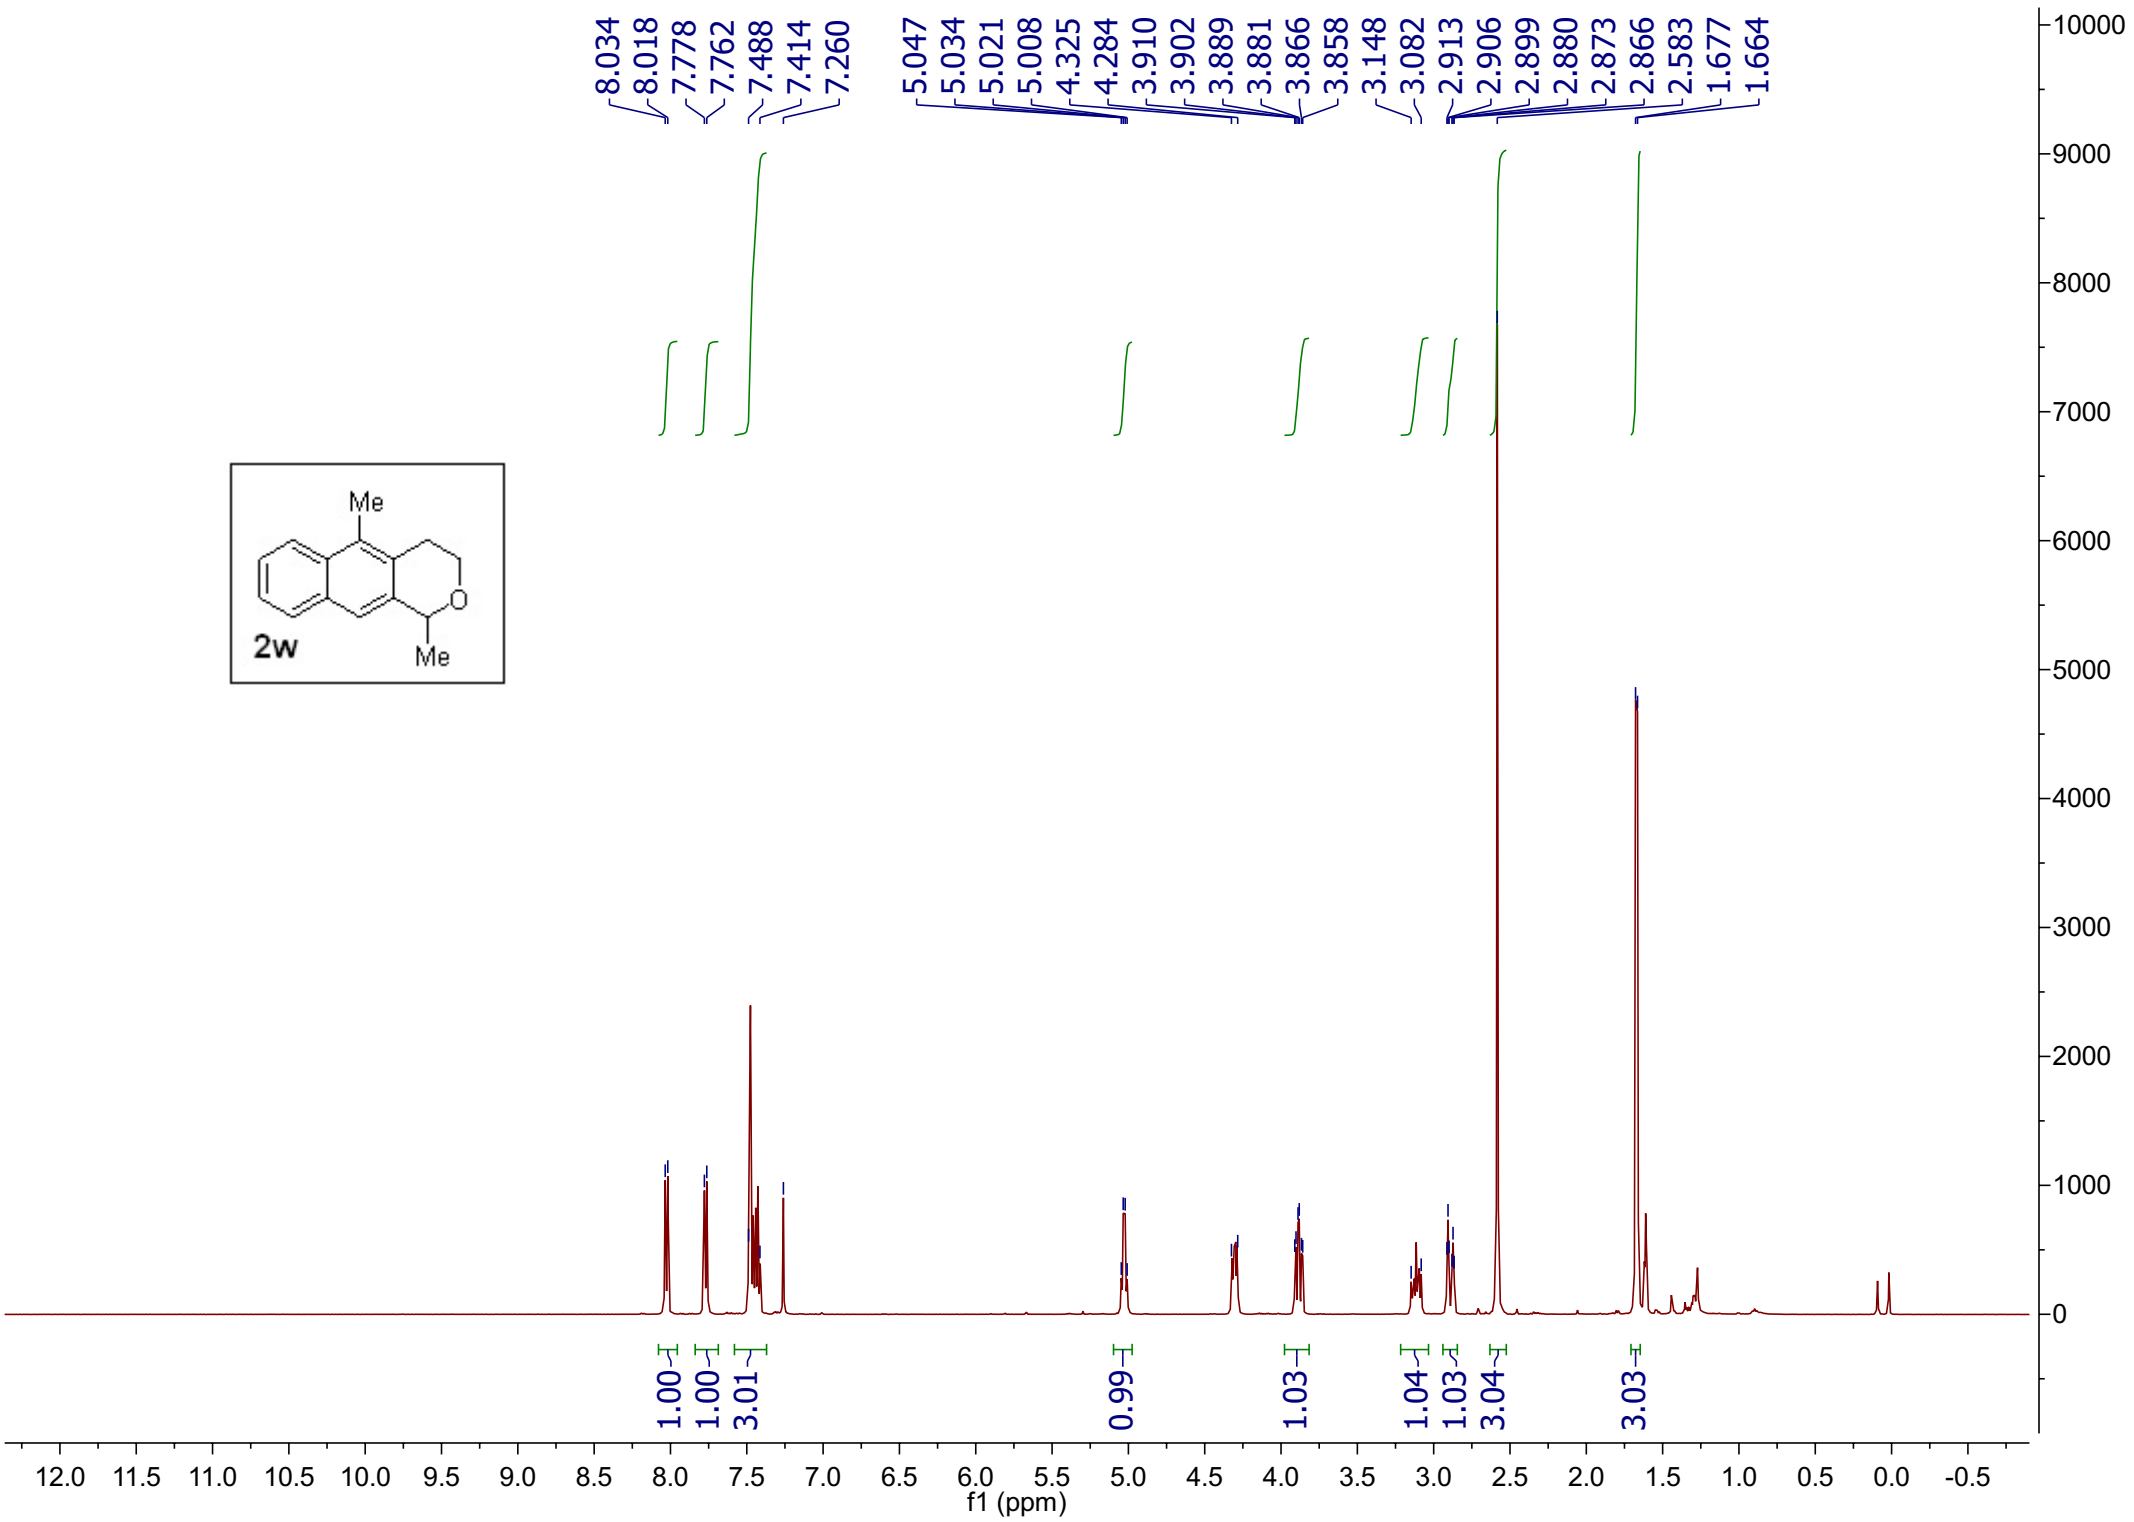

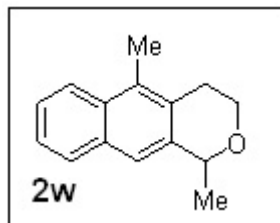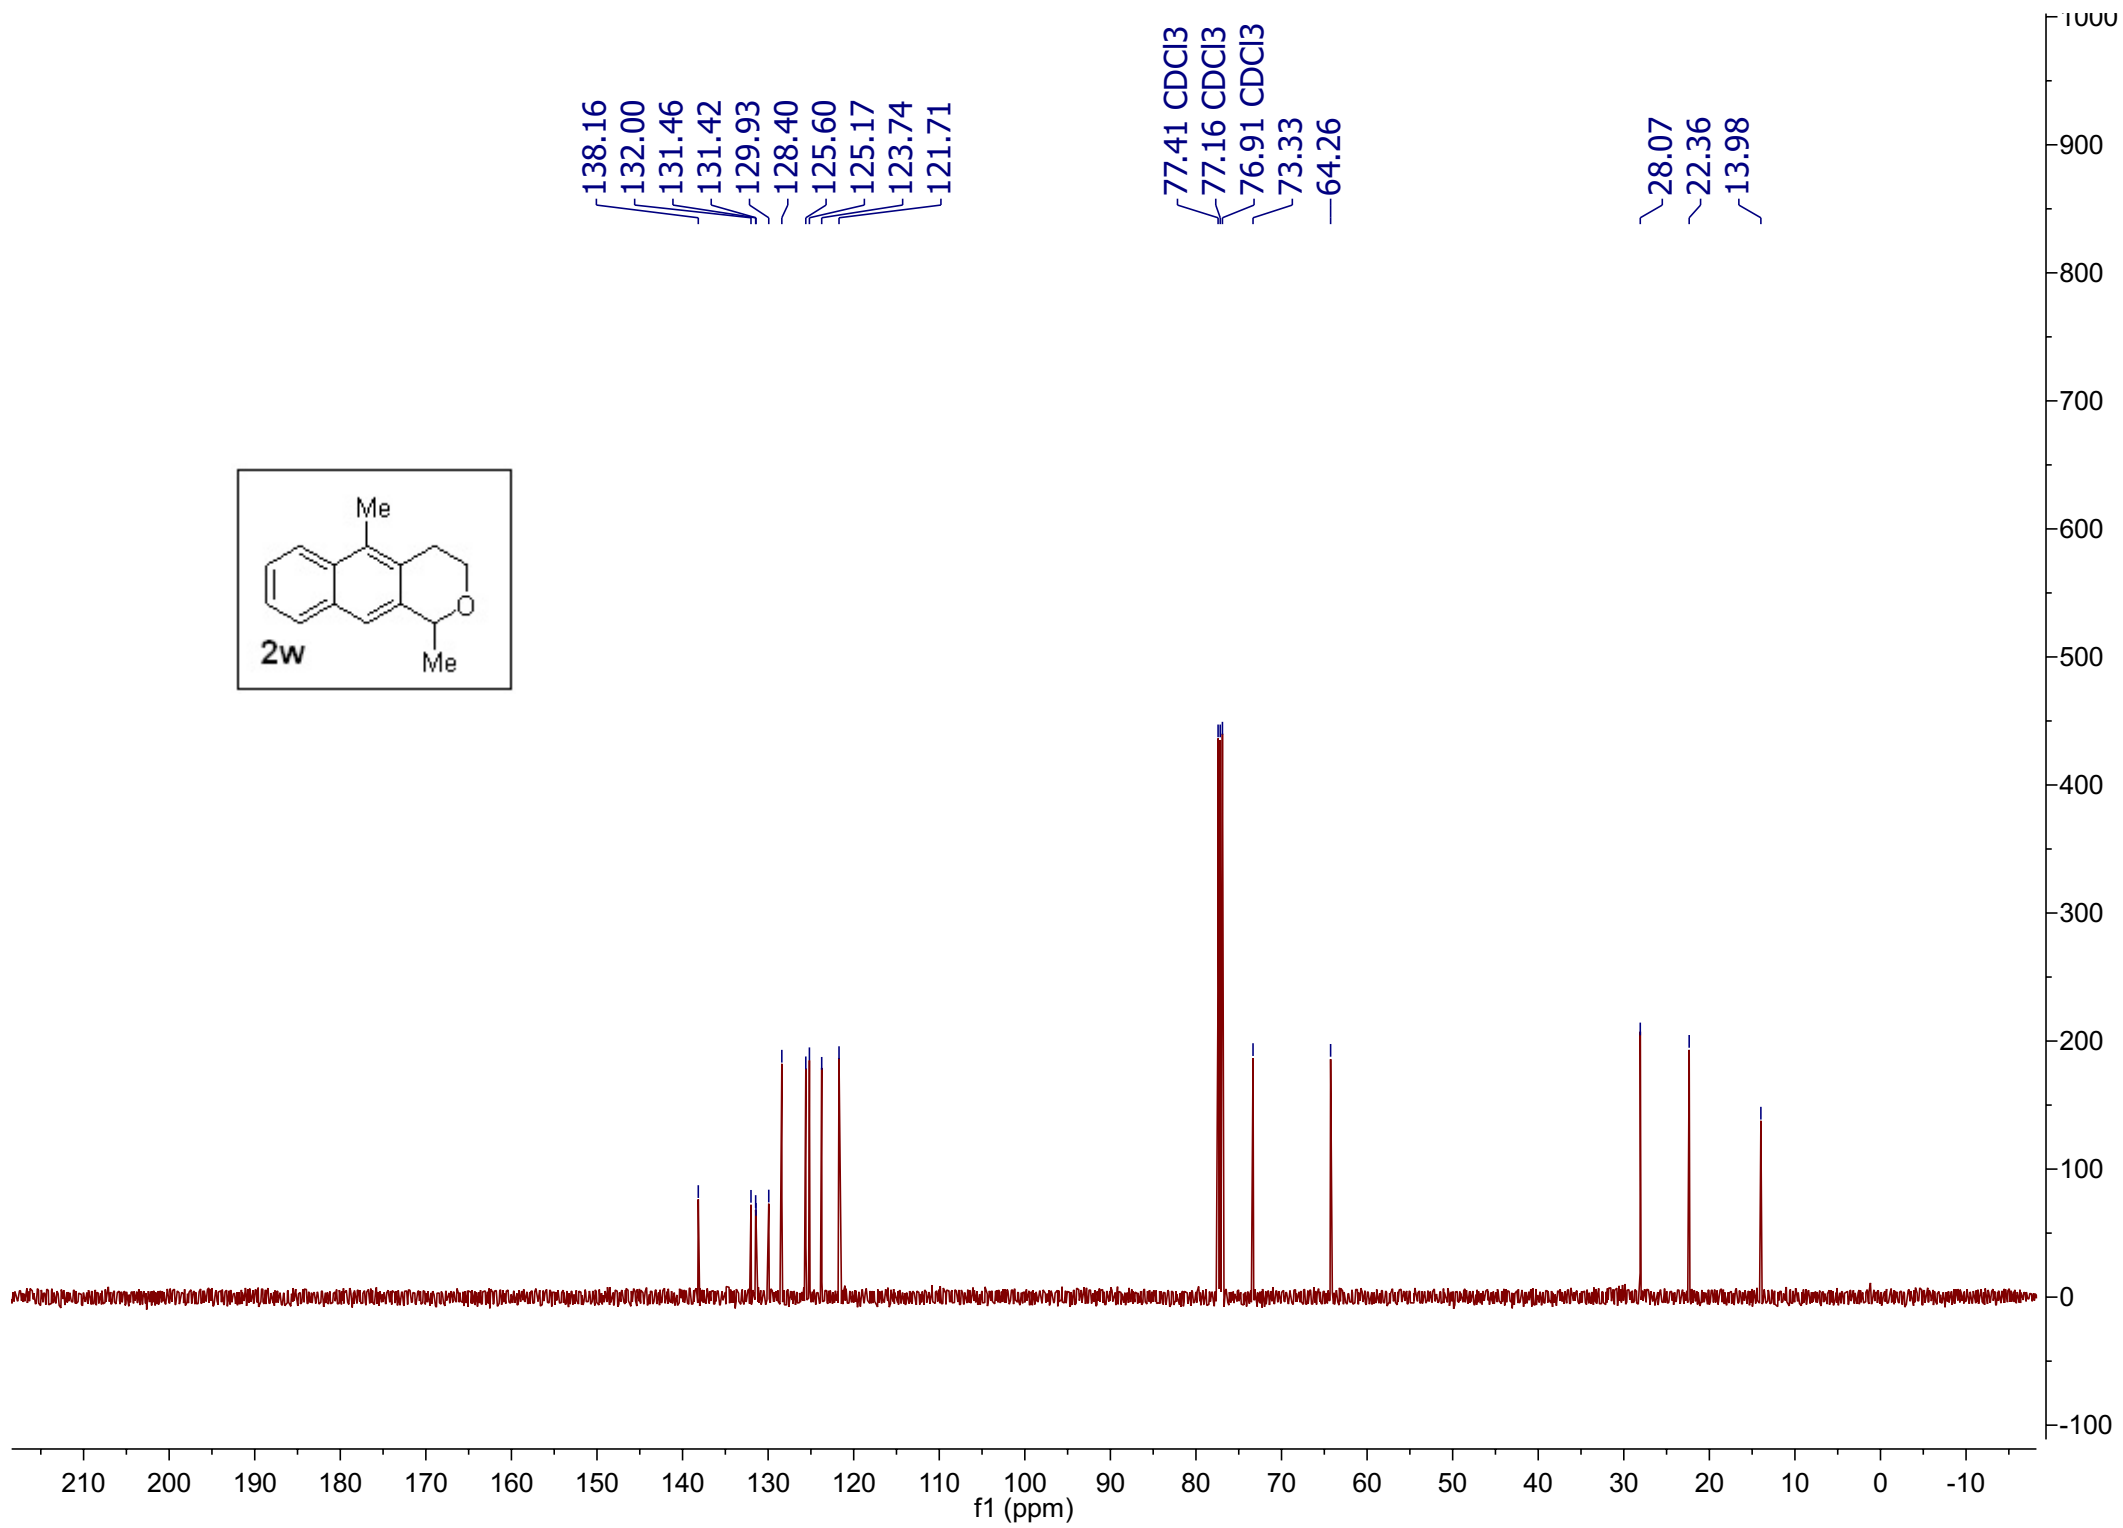



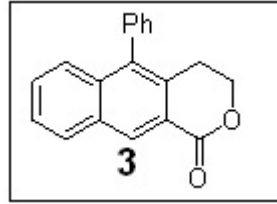

8.78  
8.01  
8.00  
7.55  
7.47  
7.29  
7.29  
7.28

4.49  
4.48  
4.47

2.92  
2.91  
2.90

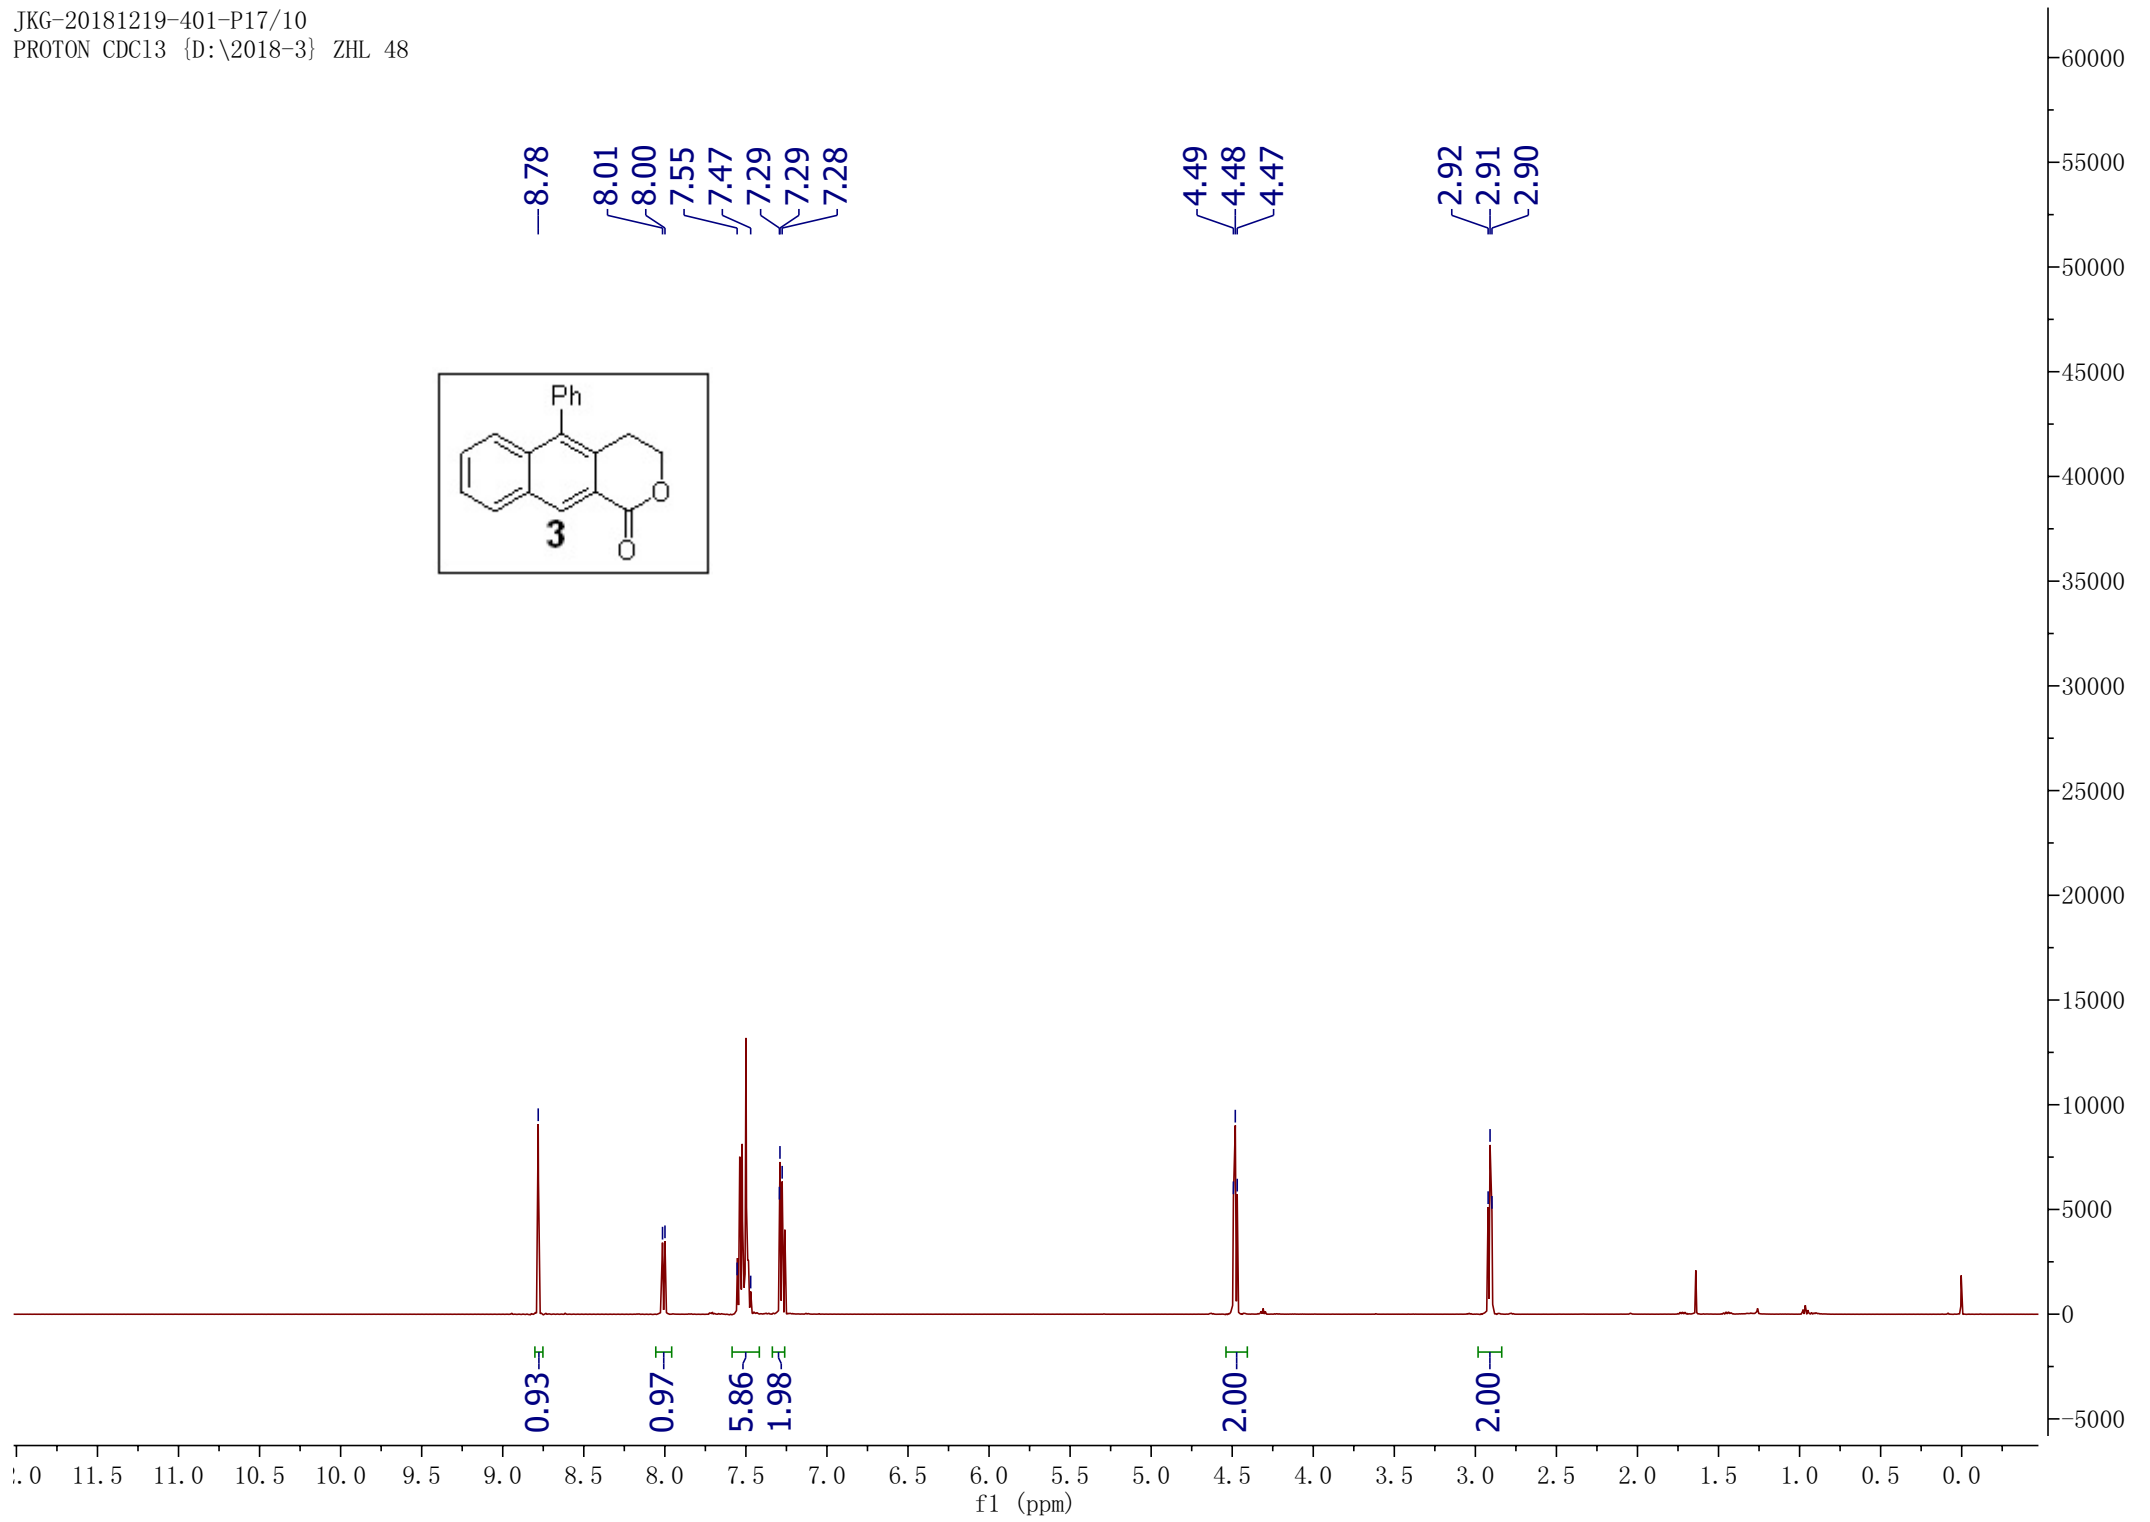

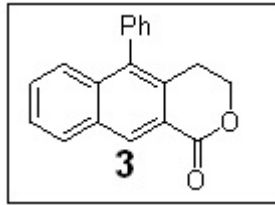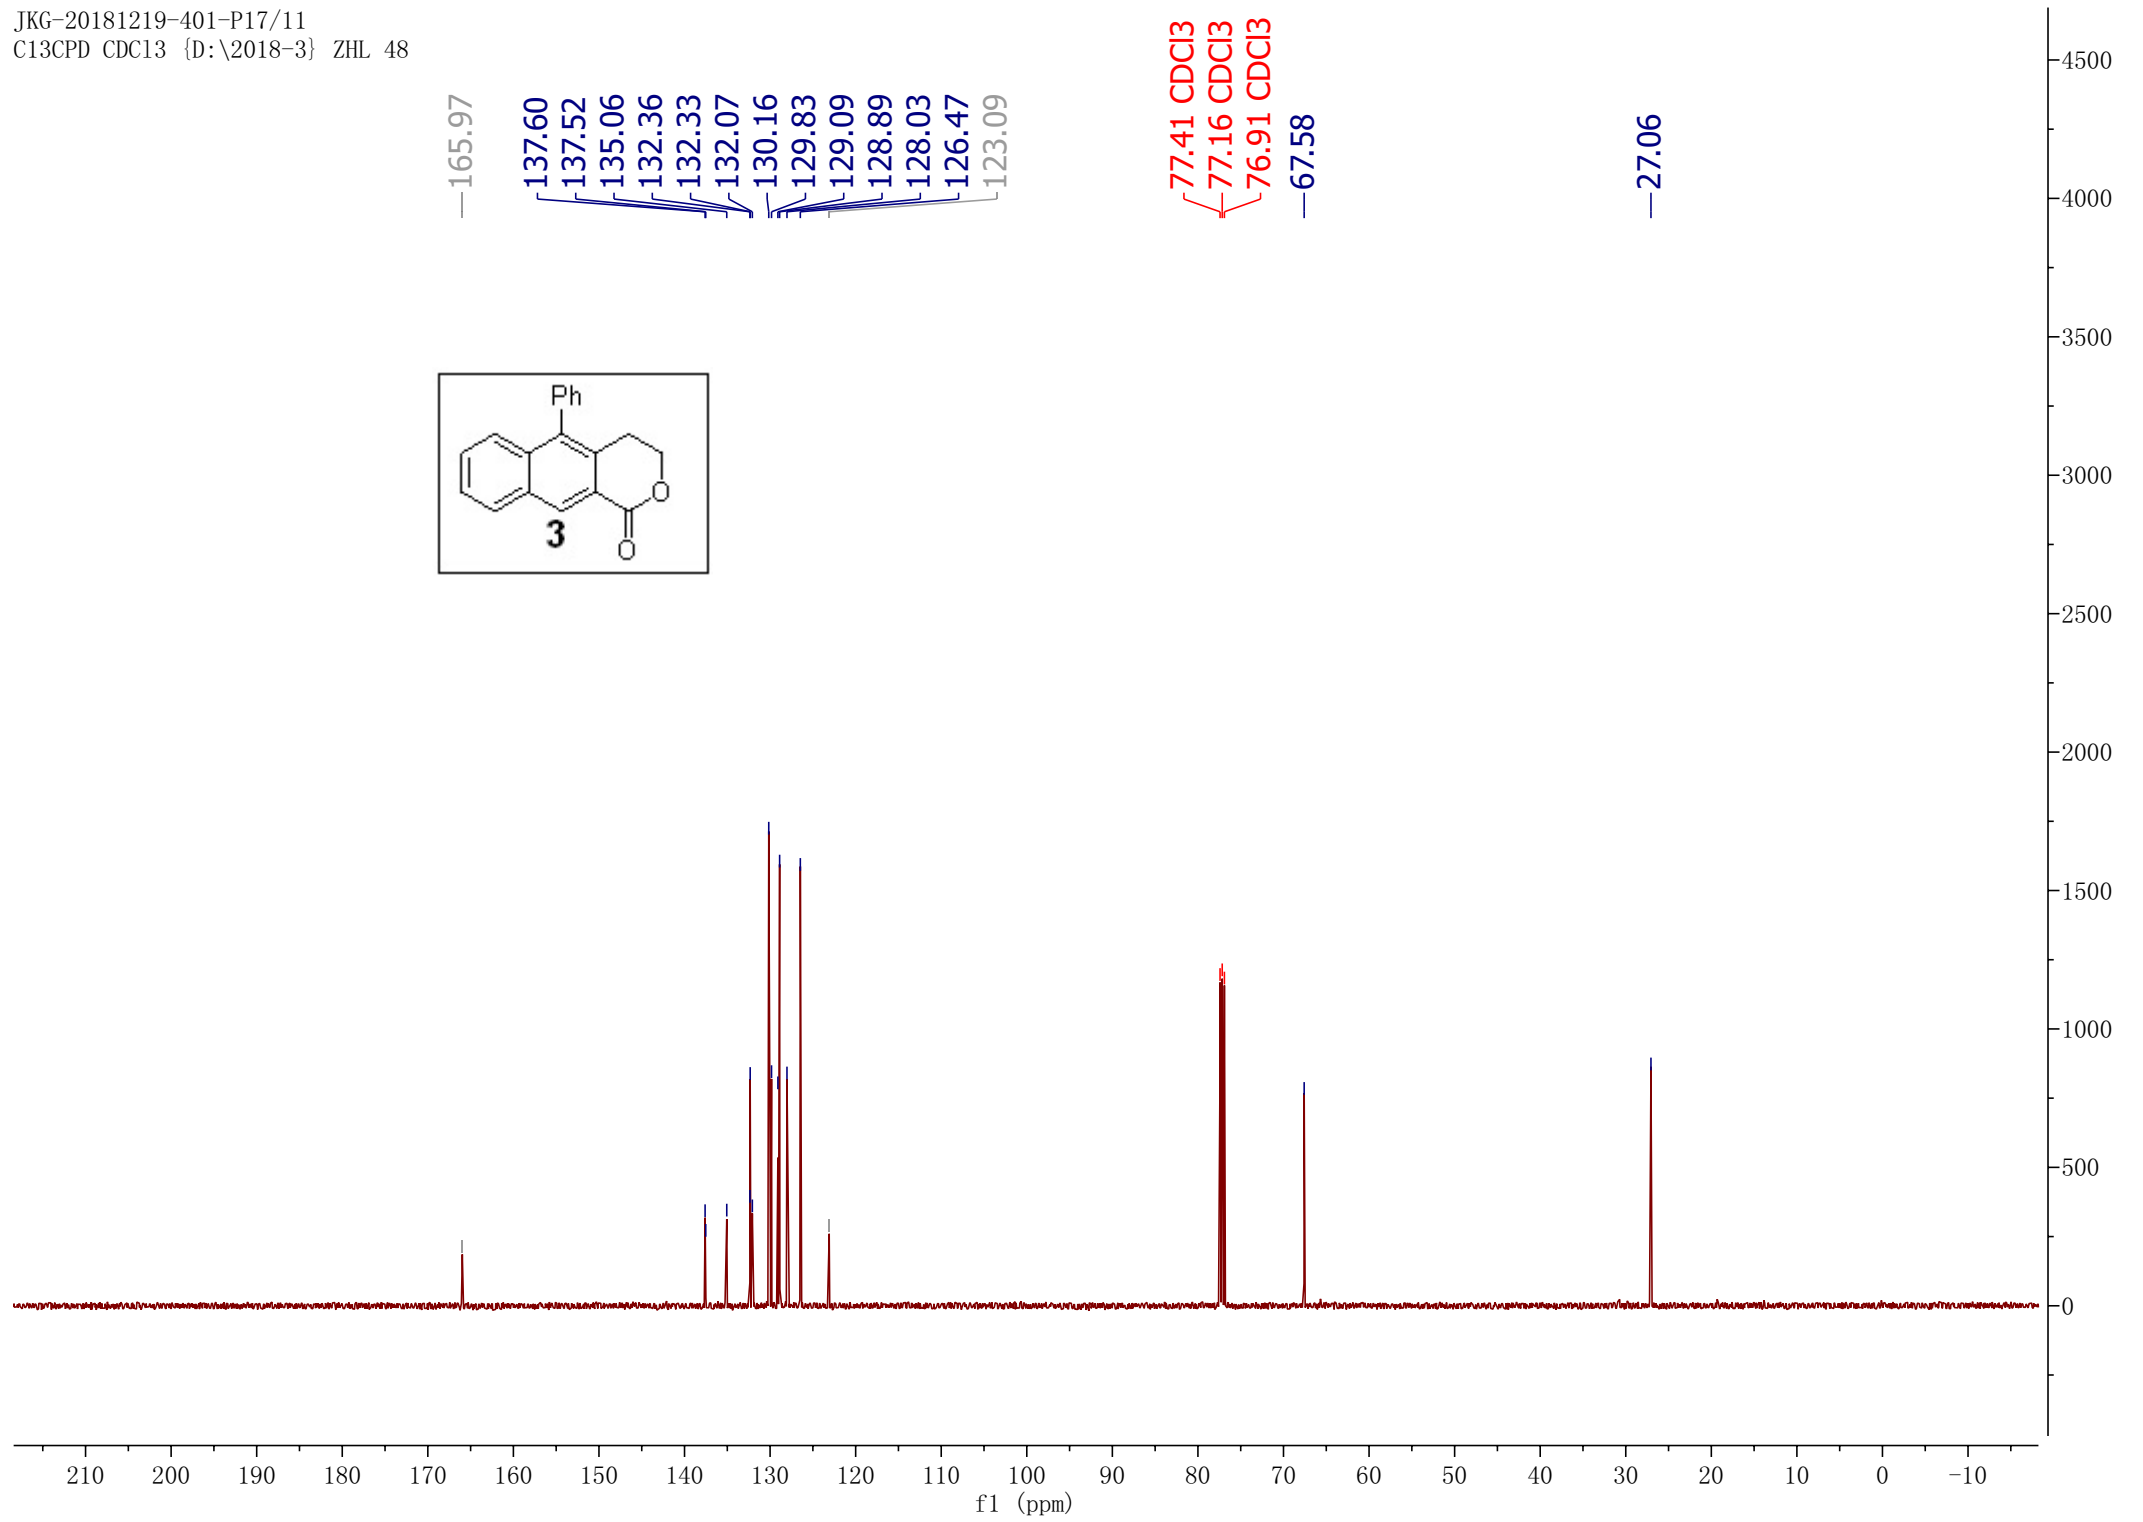

Supplement: d0cc03285a1.pdf [file d0cc03285a1.pdf]
